# Supplementary material
Source: PubMed Central journal article supplement (PMC3137747)

## Supplemental Information

Table S1. Own Data CNVs

| SampleID | Status   | Gender | Chr | Bp_Start  | Bp_End    | Bp_Length | Rs_Start   | Rs_End     | #del_SNPs | Type |
|----------|----------|--------|-----|-----------|-----------|-----------|------------|------------|-----------|------|
| 970557   | Affected | Male   | 1   | 90624121  | 91406022  | 781902    | rs997077   | rs620760   | 134       | 1    |
| 20400    | Affected | Male   | 1   | 233845760 | 234752676 | 906917    | rs10926264 | rs10925158 | 205       | 3    |
| 20459    | Affected | Female | 1   | 233845760 | 234774439 | 928680    | rs10926264 | rs1124907  | 207       | 3    |
| 11084    | Affected | Female | 1   | 233845760 | 234789801 | 944042    | rs10926264 | rs10754577 | 216       | 3    |
| 20475    | Affected | Male   | 1   | 233850983 | 234789801 | 938819    | rs11800419 | rs10754577 | 215       | 3    |
| 60530    | Control  | Female | 1   | 244476735 | 244995641 | 518907    | rs1361409  | rs4926440  | 91        | 3    |
| 970449   | Affected | Female | 1   | 245916096 | 247177330 | 1261235   | rs12402455 | rs6704311  | 142       | 1    |
| con094   | Control  | Female | 1   | 995669    | 1111657   | 115989    | rs3934834  | rs11260549 | 20        | 3    |
| 72345    | Affected | Female | 1   | 9208308   | 9319247   | 110940    | rs10489436 | rs11121374 | 27        | 3    |
| 61675    | Control  | Female | 1   | 39979097  | 40080306  | 101210    | rs580699   | rs230310   | 19        | 3    |
| 62019    | Control  | Female | 1   | 54879395  | 55075307  | 195913    | rs1655524  | rs1544908  | 55        | 3    |
| 60334    | Affected | Male   | 1   | 84784450  | 84906200  | 121751    | rs11164005 | rs11164034 | 27        | 3    |
| 52210    | Control  | Male   | 1   | 90293206  | 90440693  | 147488    | rs12079836 | rs10754298 | 56        | 3    |
| 61170    | Affected | Male   | 1   | 112964565 | 113366167 | 401603    | rs3795820  | rs1728232  | 45        | 3    |
| 62664    | Control  | Female | 1   | 144337336 | 144458820 | 121485    | rs4246521  | rs1284300  | 13        | 1    |
| 62458    | Control  | Male   | 1   | 144337336 | 144458820 | 121485    | rs4246521  | rs1284300  | 13        | 1    |
| 60191    | Control  | Female | 1   | 144337336 | 144458820 | 121485    | rs4246521  | rs1284300  | 13        | 1    |
| 51857    | Affected | Male   | 1   | 144337336 | 144458820 | 121485    | rs4246521  | rs1284300  | 13        | 1    |
| 970476   | Control  | Female | 1   | 144337336 | 144458820 | 121485    | rs4246521  | rs1284300  | 13        | 3    |
| 61725    | Control  | Female | 1   | 145251781 | 145394019 | 142239    | rs945742   | rs4950437  | 29        | 1    |
| 960500   | Affected | Male   | 1   | 150726371 | 150990677 | 264307    | rs1199156  | rs1332506  | 44        | 3    |
| 62565    | Affected | Male   | 1   | 150775186 | 150909784 | 134599    | rs1001149  | rs12096806 | 24        | 3    |
| con020   | Control  | Male   | 1   | 173697478 | 174005626 | 308149    | rs7547439  | rs640692   | 72        | 3    |
| 960434   | Affected | Female | 1   | 174809772 | 175085370 | 275599    | rs10489474 | rs12091765 | 51        | 1    |
| 62943    | Control  | Female | 1   | 180249584 | 180536324 | 286741    | rs4418557  | rs2985431  | 72        | 3    |
| 61651    | Control  | Male   | 1   | 188554336 | 188712876 | 158541    | rs655598   | rs1171050  | 25        | 1    |
| 1337     | Affected | Male   | 1   | 214000083 | 214171814 | 171732    | rs2797227  | rs12071635 | 61        | 1    |

|         |          |        |   |           |           |        |            |            |    |   |
|---------|----------|--------|---|-----------|-----------|--------|------------|------------|----|---|
| 61813   | Affected | Male   | 1 | 214000083 | 214182331 | 182249 | rs2797227  | rs683804   | 64 | 1 |
| 60704   | Control  | Male   | 1 | 215771293 | 215961460 | 190168 | rs1930301  | rs12064774 | 33 | 1 |
| 61011   | Control  | Female | 1 | 229771352 | 229879757 | 108406 | rs12040246 | rs6541281  | 23 | 3 |
| 50645   | Affected | Male   | 1 | 229778112 | 229879757 | 101646 | rs1765782  | rs6541281  | 22 | 3 |
| 20350   | Affected | Male   | 1 | 229813573 | 229917902 | 104330 | rs892356   | rs1934909  | 20 | 3 |
| 50329   | Affected | Male   | 1 | 236719591 | 236840429 | 120839 | rs4659875  | rs2494076  | 52 | 4 |
| 61227   | Affected | Male   | 1 | 236734032 | 236844151 | 110120 | rs7513497  | rs574819   | 52 | 3 |
| 20644   | Affected | Male   | 1 | 243347970 | 243456870 | 108901 | rs4072543  | rs10924127 | 40 | 3 |
| 50334   | Affected | Male   | 1 | 243587205 | 243770613 | 183409 | rs4498839  | rs9919234  | 80 | 1 |
| 60191   | Control  | Female | 1 | 244279145 | 244523837 | 244693 | rs12751188 | rs7516664  | 55 | 1 |
| 60260   | Affected | Male   | 1 | 199297930 | 199348566 | 50637  | rs2297903  | rs2281845  | 36 | 3 |
| 759     | Affected | Male   | 1 | 12783336  | 12836483  | 53148  | rs1736763  | rs11810835 | 11 | 3 |
| 1679    | Affected | Male   | 1 | 12783336  | 12836483  | 53148  | rs1736763  | rs11810835 | 11 | 3 |
| 1973    | Affected | Male   | 1 | 12783336  | 12836483  | 53148  | rs1736763  | rs11810835 | 11 | 3 |
| 51316   | Affected | Male   | 1 | 12783336  | 12836483  | 53148  | rs1736763  | rs11810835 | 11 | 3 |
| 70149   | Affected | Female | 1 | 12783336  | 12836483  | 53148  | rs1736763  | rs11810835 | 11 | 3 |
| 20608   | Affected | Male   | 1 | 12783336  | 12836483  | 53148  | rs1736763  | rs11810835 | 11 | 1 |
| 51961   | Control  | Female | 1 | 12783336  | 12836483  | 53148  | rs1736763  | rs11810835 | 11 | 3 |
| 52328   | Control  | Male   | 1 | 12783336  | 12836483  | 53148  | rs1736763  | rs11810835 | 11 | 3 |
| 980017  | Control  | Male   | 1 | 12783336  | 12836483  | 53148  | rs1736763  | rs11810835 | 11 | 3 |
| 980026  | Control  | Male   | 1 | 12783336  | 12836483  | 53148  | rs1736763  | rs11810835 | 11 | 3 |
| 06D6216 | Control  | Female | 1 | 12783336  | 12836483  | 53148  | rs1736763  | rs11810835 | 11 | 3 |
| 60106   | Control  | Female | 1 | 12783336  | 12836483  | 53148  | rs1736763  | rs11810835 | 11 | 1 |
| 20371   | Affected | Male   | 1 | 202530432 | 202593220 | 62789  | rs11240716 | rs3014614  | 25 | 3 |
| 60775   | Control  | Male   | 1 | 65708082  | 65772622  | 64541  | rs6588147  | rs1022981  | 14 | 1 |
| 52566   | Control  | Female | 1 | 3533353   | 3601752   | 68400  | rs4648538  | rs3765731  | 14 | 3 |
| 62716   | Control  | Female | 1 | 9232333   | 9302280   | 69948  | rs732950   | rs1294046  | 19 | 3 |
| 20601   | Affected | Male   | 1 | 195089653 | 195163711 | 74059  | rs16840607 | rs4915318  | 10 | 1 |
| 20637   | Affected | Female | 1 | 195089653 | 195163711 | 74059  | rs16840607 | rs4915318  | 10 | 1 |
| 30927   | Control  | Female | 1 | 195089653 | 195163711 | 74059  | rs16840607 | rs4915318  | 10 | 3 |
| 61023   | Control  | Female | 1 | 195089653 | 195163711 | 74059  | rs16840607 | rs4915318  | 10 | 3 |
| 61275   | Control  | Male   | 1 | 195089653 | 195163711 | 74059  | rs16840607 | rs4915318  | 10 | 3 |

|         |          |        |   |           |           |         |            |            |     |   |
|---------|----------|--------|---|-----------|-----------|---------|------------|------------|-----|---|
| 71269   | Control  | Female | 1 | 195089653 | 195163711 | 74059   | rs16840607 | rs4915318  | 10  | 3 |
| 52220   | Control  | Female | 1 | 195089653 | 195163711 | 74059   | rs16840607 | rs4915318  | 10  | 1 |
| 60107   | Control  | Female | 1 | 195089653 | 195163711 | 74059   | rs16840607 | rs4915318  | 10  | 1 |
| 61034   | Control  | Female | 1 | 195089653 | 195163711 | 74059   | rs16840607 | rs4915318  | 10  | 1 |
| 72351   | Control  | Female | 1 | 195089653 | 195163711 | 74059   | rs16840607 | rs4915318  | 10  | 1 |
| 980175  | Control  | Male   | 1 | 195089653 | 195163711 | 74059   | rs16840607 | rs4915318  | 10  | 1 |
| 06D6637 | Control  | Female | 1 | 229771352 | 229846734 | 75383   | rs12040246 | rs12084975 | 17  | 3 |
| 20231   | Affected | Male   | 1 | 9243828   | 9319247   | 75420   | rs2268169  | rs11121374 | 20  | 3 |
| 20356   | Affected | Male   | 1 | 9243828   | 9319247   | 75420   | rs2268169  | rs11121374 | 20  | 3 |
| 41651   | Affected | Male   | 1 | 9243828   | 9319247   | 75420   | rs2268169  | rs11121374 | 20  | 3 |
| 62940   | Affected | Male   | 1 | 9243828   | 9319247   | 75420   | rs2268169  | rs11121374 | 20  | 3 |
| 30815   | Control  | Male   | 1 | 9243828   | 9319247   | 75420   | rs2268169  | rs11121374 | 20  | 3 |
| 52436   | Control  | Female | 1 | 9243828   | 9319247   | 75420   | rs2268169  | rs11121374 | 20  | 3 |
| 970402  | Control  | Female | 1 | 9243828   | 9319247   | 75420   | rs2268169  | rs11121374 | 20  | 3 |
| 51644   | Affected | Female | 1 | 2909010   | 2986462   | 77453   | rs6424065  | rs1569419  | 18  | 3 |
| 60234   | Control  | Male   | 1 | 57987244  | 58065209  | 77966   | rs10889070 | rs706411   | 23  | 1 |
| 20529   | Affected | Female | 1 | 9240988   | 9319247   | 78260   | rs3753163  | rs11121374 | 21  | 3 |
| 20686   | Affected | Male   | 1 | 9240988   | 9319247   | 78260   | rs3753163  | rs11121374 | 21  | 3 |
| 20403   | Affected | Female | 1 | 154601735 | 154688278 | 86544   | rs2764406  | rs2477972  | 26  | 3 |
| 60807   | Affected | Male   | 1 | 229791491 | 229879757 | 88267   | rs1612154  | rs6541281  | 21  | 3 |
| 11084   | Affected | Female | 1 | 222403259 | 222494884 | 91626   | rs10916370 | rs4654009  | 12  | 3 |
| 41877   | Affected | Male   | 1 | 211097781 | 211193164 | 95384   | rs1047881  | rs2935214  | 27  | 3 |
| 11223   | Affected | Male   | 2 | 381781    | 4176616   | 3794836 | rs12475610 | rs1983365  | 954 | 3 |
| 20404   | Affected | Male   | 2 | 836164    | 1854799   | 1018636 | rs4533500  | rs4853754  | 209 | 3 |
| 50079   | Affected | Male   | 2 | 6291555   | 6926633   | 635079  | rs6743687  | rs2712029  | 181 | 3 |
| 1793    | Affected | Male   | 2 | 32487194  | 33183461  | 696268  | rs7609320  | rs11124305 | 155 | 3 |
| 51723   | Affected | Female | 2 | 32487194  | 33183461  | 696268  | rs7609320  | rs11124305 | 155 | 3 |
| con045  | Control  | Male   | 2 | 98267182  | 98904001  | 636820  | rs17428262 | rs908672   | 96  | 3 |
| 51358   | Control  | Male   | 2 | 220979372 | 222139227 | 1159856 | rs4553816  | rs3770143  | 252 | 3 |
| 52434   | Affected | Male   | 2 | 19443     | 143302    | 123860  | rs4637157  | rs409572   | 18  | 3 |
| 06D6233 | Control  | Female | 2 | 19443     | 232800    | 213358  | rs4637157  | rs10181051 | 35  | 1 |
| 11223   | Affected | Male   | 2 | 19443     | 373458    | 354016  | rs4637157  | rs4374407  | 51  | 1 |

|         |          |        |   |           |           |        |            |            |    |   |
|---------|----------|--------|---|-----------|-----------|--------|------------|------------|----|---|
| 960454  | Affected | Female | 2 | 75793     | 232800    | 157008 | rs6713375  | rs10181051 | 30 | 1 |
| 52327   | Affected | Female | 2 | 143279    | 356410    | 213132 | rs408209   | rs958877   | 34 | 3 |
| 960039  | Affected | Male   | 2 | 686317    | 904564    | 218248 | rs4517996  | rs4854431  | 41 | 3 |
| 70669   | Control  | Female | 2 | 10529542  | 10768380  | 238839 | rs818169   | rs7422405  | 72 | 3 |
| 61205   | Control  | Female | 2 | 10529542  | 10779639  | 250098 | rs818169   | rs12468286 | 73 | 3 |
| 980654  | Affected | Male   | 2 | 10579817  | 10902815  | 322999 | rs12466300 | rs1734389  | 83 | 3 |
| 60107   | Control  | Female | 2 | 29151876  | 29318933  | 167058 | rs7583117  | rs13391633 | 73 | 3 |
| 960101  | Affected | Male   | 2 | 33068411  | 33178482  | 110072 | rs10181178 | rs218214   | 45 | 1 |
| 52609   | Control  | Female | 2 | 33746267  | 34005364  | 259098 | rs13035680 | rs13414817 | 81 | 1 |
| con045  | Control  | Male   | 2 | 38114628  | 38313434  | 198807 | rs336037   | rs3856501  | 69 | 3 |
| 1826    | Affected | Male   | 2 | 38424759  | 38862453  | 437695 | rs10198323 | rs1056104  | 84 | 3 |
| 61863   | Control  | Female | 2 | 44432402  | 44611058  | 178657 | rs11680553 | rs10495919 | 41 | 1 |
| 70950   | Control  | Female | 2 | 49071420  | 49193234  | 121815 | rs2072486  | rs11891561 | 43 | 1 |
| con084  | Control  | Female | 2 | 50786446  | 50900862  | 114417 | rs1518548  | rs9309203  | 39 | 3 |
| 960224  | Affected | Male   | 2 | 50786446  | 50900862  | 114417 | rs1518548  | rs9309203  | 39 | 3 |
| 20421   | Affected | Male   | 2 | 51002576  | 51250922  | 248347 | rs7423296  | rs10490156 | 53 | 1 |
| 61723   | Affected | Female | 2 | 51024962  | 51255180  | 230219 | rs4971709  | rs964865   | 53 | 1 |
| 51713   | Affected | Male   | 2 | 110186944 | 110292012 | 105069 | rs163667   | rs1154652  | 13 | 3 |
| 51318   | Affected | Male   | 2 | 110186944 | 110292012 | 105069 | rs163667   | rs1154652  | 13 | 3 |
| 41452   | Affected | Male   | 2 | 110186944 | 110292012 | 105069 | rs163667   | rs1154652  | 13 | 3 |
| 62247   | Control  | Male   | 2 | 110214532 | 110339819 | 125288 | rs6716800  | rs13386516 | 14 | 1 |
| 06D6232 | Control  | Male   | 2 | 110214532 | 110339819 | 125288 | rs6716800  | rs13386516 | 14 | 1 |
| 2050    | Affected | Male   | 2 | 110214532 | 110339819 | 125288 | rs6716800  | rs13386516 | 14 | 1 |
| 60995   | Affected | Male   | 2 | 110214532 | 110339819 | 125288 | rs6716800  | rs13386516 | 14 | 1 |
| 70947   | Affected | Male   | 2 | 131198948 | 131668431 | 469484 | rs11680782 | rs1834274  | 60 | 1 |
| 20610   | Affected | Female | 2 | 141791627 | 141933237 | 141611 | rs6712429  | rs7605083  | 40 | 1 |
| 06D6369 | Control  | Male   | 2 | 148806584 | 148918245 | 111662 | rs1453317  | rs1446553  | 20 | 1 |
| 52377   | Control  | Male   | 2 | 160303373 | 160451108 | 147736 | rs4477859  | rs2271383  | 32 | 3 |
| 60805   | Control  | Female | 2 | 160310116 | 160451108 | 140993 | rs5002908  | rs2271383  | 31 | 3 |
| con076  | Control  | Female | 2 | 176852275 | 176957218 | 104944 | rs12151388 | rs2069172  | 14 | 3 |
| 62458   | Control  | Male   | 2 | 180481341 | 180592740 | 111400 | rs9288043  | rs262269   | 22 | 1 |
| 980182  | Affected | Male   | 2 | 183398499 | 183724872 | 326374 | rs11902959 | rs3762477  | 57 | 3 |

|         |          |        |   |           |           |        |            |            |     |   |
|---------|----------|--------|---|-----------|-----------|--------|------------|------------|-----|---|
| con091  | Control  | Male   | 2 | 190701607 | 190970187 | 268581 | rs6718711  | rs11695439 | 51  | 3 |
| 62896   | Control  | Male   | 2 | 217671980 | 217876096 | 204117 | rs13405034 | rs4674141  | 35  | 1 |
| 61703   | Control  | Female | 2 | 232913134 | 233017792 | 104659 | rs1554296  | rs790040   | 19  | 3 |
| 980008  | Affected | Male   | 2 | 237695944 | 238189006 | 493063 | rs10195205 | rs13414926 | 144 | 3 |
| 60995   | Affected | Male   | 2 | 237719636 | 238189006 | 469371 | rs7573090  | rs13414926 | 142 | 3 |
| 50669   | Control  | Male   | 2 | 242565979 | 242692820 | 126842 | rs12987376 | rs12469535 | 17  | 1 |
| con069  | Control  | Male   | 2 | 242565979 | 242692820 | 126842 | rs12987376 | rs12469535 | 17  | 1 |
| 71080   | Control  | Female | 2 | 242565979 | 242692820 | 126842 | rs12987376 | rs12469535 | 17  | 1 |
| 06D6463 | Control  | Female | 2 | 242565979 | 242692820 | 126842 | rs12987376 | rs12469535 | 17  | 1 |
| con075  | Control  | Male   | 2 | 242565979 | 242692820 | 126842 | rs12987376 | rs12469535 | 17  | 1 |
| con005  | Control  | Female | 2 | 242565979 | 242692820 | 126842 | rs12987376 | rs12469535 | 17  | 1 |
| 1493    | Affected | Male   | 2 | 242565979 | 242692820 | 126842 | rs12987376 | rs12469535 | 17  | 1 |
| 11209   | Affected | Male   | 2 | 242565979 | 242692820 | 126842 | rs12987376 | rs12469535 | 17  | 1 |
| 50858   | Affected | Female | 2 | 242565979 | 242692820 | 126842 | rs12987376 | rs12469535 | 17  | 1 |
| 40624   | Affected | Female | 2 | 242565979 | 242692820 | 126842 | rs12987376 | rs12469535 | 17  | 1 |
| 20506   | Affected | Male   | 2 | 242565979 | 242692820 | 126842 | rs12987376 | rs12469535 | 17  | 1 |
| 60343   | Affected | Male   | 2 | 242565979 | 242692820 | 126842 | rs12987376 | rs12469535 | 17  | 1 |
| 61577   | Control  | Male   | 2 | 242565979 | 242692820 | 126842 | rs12987376 | rs12469535 | 17  | 1 |
| 1874    | Affected | Male   | 2 | 242565979 | 242692820 | 126842 | rs12987376 | rs12469535 | 17  | 1 |
| 61283   | Control  | Male   | 2 | 242565979 | 242692820 | 126842 | rs12987376 | rs12469535 | 17  | 1 |
| 51880   | Control  | Female | 2 | 242565979 | 242692820 | 126842 | rs12987376 | rs12469535 | 17  | 1 |
| 50570   | Affected | Male   | 2 | 242565979 | 242692820 | 126842 | rs12987376 | rs12469535 | 17  | 1 |
| 62229   | Control  | Male   | 2 | 242565979 | 242692820 | 126842 | rs12987376 | rs12469535 | 17  | 1 |
| 11372   | Affected | Female | 2 | 242565979 | 242692820 | 126842 | rs12987376 | rs12469535 | 17  | 1 |
| 51223   | Control  | Male   | 2 | 242565979 | 242692820 | 126842 | rs12987376 | rs12469535 | 17  | 1 |
| 60517   | Affected | Male   | 2 | 242565979 | 242692820 | 126842 | rs12987376 | rs12469535 | 17  | 1 |
| 20637   | Affected | Female | 2 | 242565979 | 242692820 | 126842 | rs12987376 | rs12469535 | 17  | 1 |
| 1826    | Affected | Male   | 2 | 242565979 | 242692820 | 126842 | rs12987376 | rs12469535 | 17  | 1 |
| 51913   | Affected | Male   | 2 | 242565979 | 242692820 | 126842 | rs12987376 | rs12469535 | 17  | 1 |
| 50123   | Affected | Male   | 2 | 242565979 | 242692820 | 126842 | rs12987376 | rs12469535 | 17  | 1 |
| 20350   | Affected | Male   | 2 | 242583251 | 242692820 | 109570 | rs4973677  | rs12469535 | 11  | 1 |
| 20601   | Affected | Male   | 2 | 80218805  | 80269145  | 50341  | rs11685504 | rs1530397  | 11  | 1 |

|         |          |        |   |           |           |       |            |            |    |   |
|---------|----------|--------|---|-----------|-----------|-------|------------|------------|----|---|
| 61305   | Control  | Female | 2 | 61068848  | 61121796  | 52949 | rs7564317  | rs2698189  | 13 | 3 |
| 970555  | Affected | Male   | 2 | 212405787 | 212460438 | 54652 | rs16846917 | rs6727114  | 15 | 1 |
| 60106   | Control  | Female | 2 | 55152021  | 55212659  | 60639 | rs2920881  | rs2968800  | 21 | 3 |
| 52049   | Control  | Female | 2 | 105103586 | 105164724 | 61139 | rs3923277  | rs2679851  | 28 | 1 |
| 70038   | Affected | Male   | 2 | 176907092 | 176968345 | 61254 | rs2689951  | rs7604433  | 10 | 1 |
| 71146   | Affected | Female | 2 | 50735657  | 50800548  | 64892 | rs1518551  | rs17501747 | 26 | 1 |
| 1494    | Affected | Female | 2 | 230755889 | 230822375 | 66487 | rs10755048 | rs9989899  | 20 | 3 |
| 60781   | Control  | Male   | 2 | 127426862 | 127493570 | 66709 | rs11887389 | rs934827   | 19 | 3 |
| 60692   | Affected | Female | 2 | 33528008  | 33595788  | 67781 | rs17013001 | rs4670648  | 50 | 3 |
| 60946   | Control  | Male   | 2 | 44360717  | 44432402  | 71686 | rs10194161 | rs11680553 | 13 | 1 |
| 61355   | Affected | Male   | 2 | 84877865  | 84949992  | 72128 | rs1192396  | rs1000919  | 16 | 1 |
| 20603   | Affected | Male   | 2 | 75290690  | 75366176  | 75487 | rs4853122  | rs2192926  | 25 | 1 |
| 20459   | Affected | Female | 2 | 74819098  | 74895392  | 76295 | rs7564471  | rs596064   | 18 | 3 |
| 50889   | Affected | Female | 2 | 33517854  | 33595788  | 77935 | rs604788   | rs4670648  | 53 | 1 |
| 51465   | Affected | Female | 2 | 241272567 | 241353054 | 80488 | rs4676385  | rs11690282 | 18 | 3 |
| 60691   | Affected | Male   | 2 | 241272567 | 241353054 | 80488 | rs4676385  | rs11690282 | 18 | 3 |
| 62426   | Affected | Female | 2 | 241272567 | 241353054 | 80488 | rs4676385  | rs11690282 | 18 | 3 |
| 52188   | Control  | Male   | 2 | 241272567 | 241353054 | 80488 | rs4676385  | rs11690282 | 18 | 3 |
| 06D6444 | Control  | Female | 2 | 241272567 | 241353054 | 80488 | rs4676385  | rs11690282 | 18 | 3 |
| 41199   | Affected | Female | 2 | 197857012 | 197940884 | 83873 | rs12619296 | rs788008   | 11 | 3 |
| 51544   | Affected | Male   | 2 | 230722749 | 230807448 | 84700 | rs4973275  | rs11687292 | 39 | 1 |
| 06D6334 | Control  | Female | 2 | 179853779 | 179941872 | 88094 | rs1907423  | rs7586173  | 43 | 3 |
| 62817   | Control  | Female | 2 | 106468850 | 106556951 | 88102 | rs4362555  | rs11124120 | 17 | 3 |
| 647     | Affected | Male   | 2 | 242565979 | 242656041 | 90063 | rs12987376 | rs6740738  | 16 | 1 |
| 1384    | Affected | Male   | 2 | 242565979 | 242656041 | 90063 | rs12987376 | rs6740738  | 16 | 1 |
| 1653    | Affected | Female | 2 | 242565979 | 242656041 | 90063 | rs12987376 | rs6740738  | 16 | 1 |
| 10972   | Affected | Male   | 2 | 242565979 | 242656041 | 90063 | rs12987376 | rs6740738  | 16 | 1 |
| 11211   | Affected | Male   | 2 | 242565979 | 242656041 | 90063 | rs12987376 | rs6740738  | 16 | 1 |
| 11290   | Affected | Female | 2 | 242565979 | 242656041 | 90063 | rs12987376 | rs6740738  | 16 | 1 |
| 20532   | Affected | Male   | 2 | 242565979 | 242656041 | 90063 | rs12987376 | rs6740738  | 16 | 1 |
| 20600   | Affected | Male   | 2 | 242565979 | 242656041 | 90063 | rs12987376 | rs6740738  | 16 | 1 |
| 20638   | Affected | Male   | 2 | 242565979 | 242656041 | 90063 | rs12987376 | rs6740738  | 16 | 1 |

|         |          |        |   |           |           |       |            |            |    |   |
|---------|----------|--------|---|-----------|-----------|-------|------------|------------|----|---|
| 20653   | Affected | Male   | 2 | 242565979 | 242656041 | 90063 | rs12987376 | rs6740738  | 16 | 1 |
| 51132   | Affected | Male   | 2 | 242565979 | 242656041 | 90063 | rs12987376 | rs6740738  | 16 | 1 |
| 51316   | Affected | Male   | 2 | 242565979 | 242656041 | 90063 | rs12987376 | rs6740738  | 16 | 1 |
| 52368   | Affected | Female | 2 | 242565979 | 242656041 | 90063 | rs12987376 | rs6740738  | 16 | 1 |
| 52572   | Affected | Male   | 2 | 242565979 | 242656041 | 90063 | rs12987376 | rs6740738  | 16 | 1 |
| 52579   | Affected | Female | 2 | 242565979 | 242656041 | 90063 | rs12987376 | rs6740738  | 16 | 1 |
| 60260   | Affected | Male   | 2 | 242565979 | 242656041 | 90063 | rs12987376 | rs6740738  | 16 | 1 |
| 60360   | Affected | Male   | 2 | 242565979 | 242656041 | 90063 | rs12987376 | rs6740738  | 16 | 1 |
| 61040   | Affected | Male   | 2 | 242565979 | 242656041 | 90063 | rs12987376 | rs6740738  | 16 | 1 |
| 61371   | Affected | Male   | 2 | 242565979 | 242656041 | 90063 | rs12987376 | rs6740738  | 16 | 1 |
| 61673   | Affected | Male   | 2 | 242565979 | 242656041 | 90063 | rs12987376 | rs6740738  | 16 | 1 |
| 61741   | Affected | Male   | 2 | 242565979 | 242656041 | 90063 | rs12987376 | rs6740738  | 16 | 1 |
| 61753   | Affected | Male   | 2 | 242565979 | 242656041 | 90063 | rs12987376 | rs6740738  | 16 | 1 |
| 70586   | Affected | Male   | 2 | 242565979 | 242656041 | 90063 | rs12987376 | rs6740738  | 16 | 1 |
| 70595   | Affected | Female | 2 | 242565979 | 242656041 | 90063 | rs12987376 | rs6740738  | 16 | 1 |
| 70856   | Affected | Female | 2 | 242565979 | 242656041 | 90063 | rs12987376 | rs6740738  | 16 | 1 |
| 70947   | Affected | Male   | 2 | 242565979 | 242656041 | 90063 | rs12987376 | rs6740738  | 16 | 1 |
| 51637   | Affected | Female | 2 | 242565979 | 242656041 | 90063 | rs12987376 | rs6740738  | 16 | 0 |
| 981050  | Affected | Male   | 2 | 242565979 | 242656041 | 90063 | rs12987376 | rs6740738  | 16 | 0 |
| 30721   | Control  | Male   | 2 | 242565979 | 242656041 | 90063 | rs12987376 | rs6740738  | 16 | 1 |
| 50943   | Control  | Female | 2 | 242565979 | 242656041 | 90063 | rs12987376 | rs6740738  | 16 | 1 |
| 52210   | Control  | Male   | 2 | 242565979 | 242656041 | 90063 | rs12987376 | rs6740738  | 16 | 1 |
| 52467   | Control  | Female | 2 | 242565979 | 242656041 | 90063 | rs12987376 | rs6740738  | 16 | 1 |
| 60955   | Control  | Male   | 2 | 242565979 | 242656041 | 90063 | rs12987376 | rs6740738  | 16 | 1 |
| 61909   | Control  | Male   | 2 | 242565979 | 242656041 | 90063 | rs12987376 | rs6740738  | 16 | 1 |
| 62570   | Control  | Female | 2 | 242565979 | 242656041 | 90063 | rs12987376 | rs6740738  | 16 | 1 |
| 71214   | Control  | Female | 2 | 242565979 | 242656041 | 90063 | rs12987376 | rs6740738  | 16 | 1 |
| 970406  | Control  | Female | 2 | 242565979 | 242656041 | 90063 | rs12987376 | rs6740738  | 16 | 1 |
| 06D6297 | Control  | Male   | 2 | 242565979 | 242656041 | 90063 | rs12987376 | rs6740738  | 16 | 1 |
| 50164   | Affected | Female | 2 | 60856697  | 60952146  | 95450 | rs11687809 | rs842624   | 20 | 3 |
| 61577   | Control  | Male   | 2 | 60856697  | 60952146  | 95450 | rs11687809 | rs842624   | 20 | 3 |
| 61161   | Affected | Female | 2 | 110243431 | 110339819 | 96389 | rs3789735  | rs13386516 | 12 | 1 |

|         |          |        |   |           |           |         |            |            |     |   |
|---------|----------|--------|---|-----------|-----------|---------|------------|------------|-----|---|
| 30842   | Affected | Male   | 2 | 241272567 | 241371118 | 98552   | rs4676385  | rs2288750  | 20  | 3 |
| 41727   | Affected | Male   | 2 | 241272567 | 241371118 | 98552   | rs4676385  | rs2288750  | 20  | 3 |
| 30814   | Affected | Male   | 3 | 353069    | 1551741   | 1198673 | rs7649544  | rs1000131  | 391 | 3 |
| 60837   | Control  | Male   | 3 | 491255    | 1203607   | 712353  | rs2729076  | rs3772360  | 159 | 3 |
| 20615   | Affected | Female | 3 | 491255    | 1635507   | 1144253 | rs2729076  | rs377914   | 395 | 1 |
| 11377   | Affected | Male   | 3 | 16158866  | 16807832  | 648967  | rs7642249  | rs6442641  | 206 | 3 |
| con020  | Control  | Male   | 3 | 76254922  | 77652511  | 1397590 | rs1400237  | rs1447846  | 298 | 3 |
| 30927   | Control  | Female | 3 | 118667838 | 120755573 | 2087736 | rs1698042  | rs626364   | 434 | 3 |
| 06D6347 | Control  | Female | 3 | 139634661 | 140367414 | 732754  | rs1679153  | rs7626828  | 77  | 3 |
| 41451   | Affected | Female | 3 | 197219312 | 198828573 | 1609262 | rs6797622  | rs9917735  | 262 | 1 |
| 60837   | Control  | Male   | 3 | 135814    | 235896    | 100083  | rs1568086  | rs11721252 | 42  | 3 |
| 71146   | Affected | Female | 3 | 915698    | 1251092   | 335395  | rs2313182  | rs11925058 | 118 | 1 |
| 62246   | Affected | Male   | 3 | 2125400   | 2406546   | 281147  | rs2729005  | rs1604553  | 117 | 1 |
| 60807   | Affected | Male   | 3 | 3827866   | 4258763   | 430898  | rs9850004  | rs13088039 | 126 | 1 |
| 62347   | Control  | Female | 3 | 4140733   | 4317353   | 176621  | rs795302   | rs310712   | 31  | 1 |
| 61333   | Control  | Male   | 3 | 4156750   | 4287735   | 130986  | rs952644   | rs310692   | 21  | 1 |
| 970449  | Affected | Female | 3 | 4156750   | 4303411   | 146662  | rs952644   | rs997828   | 26  | 1 |
| 960039  | Affected | Male   | 3 | 4156750   | 4303411   | 146662  | rs952644   | rs997828   | 26  | 1 |
| 30844   | Affected | Male   | 3 | 4187007   | 4315847   | 128841  | rs1017903  | rs310709   | 24  | 1 |
| 20620   | Affected | Male   | 3 | 9154971   | 9454142   | 299172  | rs2675187  | rs2442825  | 99  | 3 |
| 70492   | Affected | Female | 3 | 11738001  | 11864365  | 126365  | rs11128570 | rs430373   | 33  | 3 |
| con043  | Control  | Female | 3 | 11815903  | 12031308  | 215406  | rs1846206  | rs6776447  | 59  | 3 |
| 61020   | Control  | Female | 3 | 35798283  | 35900876  | 102594  | rs3772397  | rs9869067  | 14  | 3 |
| 52434   | Affected | Male   | 3 | 35798283  | 35900876  | 102594  | rs3772397  | rs9869067  | 14  | 3 |
| 20475   | Affected | Male   | 3 | 35798283  | 35900876  | 102594  | rs3772397  | rs9869067  | 14  | 3 |
| con048  | Control  | Male   | 3 | 35798283  | 35913799  | 115517  | rs3772397  | rs10049409 | 16  | 3 |
| 70597   | Affected | Male   | 3 | 35798283  | 35913799  | 115517  | rs3772397  | rs10049409 | 16  | 3 |
| 61011   | Control  | Female | 3 | 35798283  | 35913799  | 115517  | rs3772397  | rs10049409 | 16  | 3 |
| 06D6852 | Control  | Female | 3 | 35798283  | 35913799  | 115517  | rs3772397  | rs10049409 | 16  | 3 |
| con058  | Control  | Male   | 3 | 63160790  | 63572155  | 411366  | rs4234674  | rs6796563  | 155 | 3 |
| 30889   | Control  | Female | 3 | 146962467 | 147228852 | 266386  | rs16857208 | rs988501   | 60  | 1 |
| 981079  | Control  | Female | 3 | 146962467 | 147235163 | 272697  | rs16857208 | rs16857836 | 61  | 1 |



|        |          |        |   |           |           |        |            |            |    |   |
|--------|----------|--------|---|-----------|-----------|--------|------------|------------|----|---|
| 71400  | Affected | Male   | 3 | 151958110 | 152077375 | 119266 | rs1148369  | rs574445   | 19 | 3 |
| 20401  | Affected | Male   | 3 | 152935130 | 153037439 | 102310 | rs1520132  | rs6440788  | 27 | 1 |
| 71400  | Affected | Male   | 3 | 168700658 | 168806403 | 105746 | rs13060964 | rs9837095  | 14 | 1 |
| 51119  | Affected | Male   | 3 | 178039364 | 178352192 | 312829 | rs9874964  | rs6443429  | 72 | 3 |
| 808    | Affected | Male   | 3 | 198610700 | 198828573 | 217874 | rs7645524  | rs9917735  | 56 | 3 |
| 72345  | Affected | Female | 3 | 2187318   | 2237692   | 50375  | rs2728524  | rs1523314  | 21 | 3 |
| 20643  | Affected | Male   | 3 | 57954807  | 58013383  | 58577  | rs1098018  | rs12634644 | 14 | 3 |
| 61542  | Affected | Male   | 3 | 152997280 | 153056976 | 59697  | rs17204697 | rs10804755 | 13 | 1 |
| 60235  | Affected | Female | 3 | 192522868 | 192582767 | 59900  | rs4677722  | rs389765   | 29 | 3 |
| 62594  | Control  | Male   | 3 | 11846215  | 11907455  | 61241  | rs11551661 | rs9869051  | 21 | 1 |
| 970166 | Affected | Male   | 3 | 152992947 | 153056976 | 64030  | rs6440786  | rs10804755 | 15 | 1 |
| 20686  | Affected | Male   | 3 | 2494703   | 2559376   | 64674  | rs17014863 | rs7649181  | 25 | 1 |
| 71380  | Affected | Male   | 3 | 2494703   | 2559376   | 64674  | rs17014863 | rs7649181  | 25 | 1 |
| con083 | Control  | Female | 3 | 2494703   | 2559376   | 64674  | rs17014863 | rs7649181  | 25 | 1 |
| 11223  | Affected | Male   | 3 | 120211804 | 120284544 | 72741  | rs1369582  | rs16829334 | 14 | 3 |
| 11323  | Affected | Male   | 3 | 120211804 | 120284544 | 72741  | rs1369582  | rs16829334 | 14 | 3 |
| 61362  | Affected | Male   | 3 | 120211804 | 120284544 | 72741  | rs1369582  | rs16829334 | 14 | 3 |
| 61818  | Affected | Male   | 3 | 120211804 | 120284544 | 72741  | rs1369582  | rs16829334 | 14 | 3 |
| 70565  | Affected | Male   | 3 | 120211804 | 120284544 | 72741  | rs1369582  | rs16829334 | 14 | 3 |
| 960224 | Affected | Male   | 3 | 120211804 | 120284544 | 72741  | rs1369582  | rs16829334 | 14 | 3 |
| 61839  | Control  | Male   | 3 | 199219277 | 199298372 | 79096  | rs7648906  | rs9879842  | 11 | 3 |
| 60567  | Affected | Female | 3 | 156948185 | 157029968 | 81784  | rs358742   | rs382534   | 17 | 1 |
| 61357  | Affected | Male   | 3 | 101833435 | 101916282 | 82848  | rs1144125  | rs591728   | 13 | 4 |
| 1973   | Affected | Male   | 3 | 101833435 | 101916282 | 82848  | rs1144125  | rs591728   | 13 | 3 |
| 20404  | Affected | Male   | 3 | 101833435 | 101916282 | 82848  | rs1144125  | rs591728   | 13 | 3 |
| 52040  | Affected | Male   | 3 | 101833435 | 101916282 | 82848  | rs1144125  | rs591728   | 13 | 3 |
| 61138  | Affected | Female | 3 | 101833435 | 101916282 | 82848  | rs1144125  | rs591728   | 13 | 3 |
| 50167  | Affected | Male   | 3 | 43260400  | 43343677  | 83278  | rs1320158  | rs17406718 | 10 | 3 |
| 11168  | Affected | Male   | 3 | 62723037  | 62807270  | 84234  | rs1849473  | rs514606   | 35 | 1 |
| 70856  | Affected | Female | 3 | 152970596 | 153056976 | 86381  | rs11924077 | rs10804755 | 23 | 1 |
| 52579  | Affected | Female | 3 | 152976373 | 153067347 | 90975  | rs6787192  | rs9823831  | 23 | 1 |
| 980042 | Control  | Male   | 3 | 152944075 | 153037439 | 93365  | rs10513418 | rs6440788  | 26 | 1 |

|         |          |        |   |           |           |        |            |            |     |   |
|---------|----------|--------|---|-----------|-----------|--------|------------|------------|-----|---|
| 51516   | Control  | Female | 3 | 120188854 | 120284544 | 95691  | rs1016284  | rs16829334 | 16  | 3 |
| 970516  | Control  | Male   | 3 | 2702523   | 2801568   | 99046  | rs1914009  | rs956764   | 56  | 3 |
| 62291   | Affected | Female | 4 | 7287993   | 7806279   | 518287 | rs1875341  | rs17466860 | 260 | 3 |
| 960150  | Affected | Male   | 4 | 188329837 | 189282611 | 952775 | rs4862782  | rs6553155  | 184 | 1 |
| 30724   | Control  | Male   | 4 | 189124414 | 189766567 | 642154 | rs12644789 | rs723647   | 163 | 3 |
| 60625   | Affected | Female | 4 | 190271285 | 191164126 | 892842 | rs6841266  | rs13120250 | 106 | 1 |
| 10864   | Affected | Female | 4 | 190271285 | 191164126 | 892842 | rs6841266  | rs13120250 | 106 | 1 |
| 62945   | Control  | Female | 4 | 190271285 | 191164126 | 892842 | rs6841266  | rs13120250 | 106 | 1 |
| 51326   | Affected | Female | 4 | 5737825   | 5845805   | 107981 | rs957727   | rs6826372  | 61  | 1 |
| 61498   | Control  | Female | 4 | 9433717   | 9540060   | 106344 | rs11938128 | rs881971   | 44  | 3 |
| 20355   | Affected | Female | 4 | 40672691  | 40914549  | 241859 | rs12511584 | rs6811777  | 64  | 3 |
| 06D6461 | Control  | Male   | 4 | 74039112  | 74258327  | 219216 | rs11733810 | rs10035001 | 28  | 3 |
| 980185  | Control  | Male   | 4 | 75619179  | 75774745  | 155567 | rs1994941  | rs4333264  | 23  | 1 |
| 61307   | Control  | Female | 4 | 107507898 | 107614425 | 106528 | rs2949646  | rs10516535 | 17  | 3 |
| 70631   | Affected | Female | 4 | 110249859 | 110364767 | 114909 | rs4368681  | rs17040097 | 23  | 1 |
| 52531   | Affected | Male   | 4 | 125773305 | 126258785 | 485481 | rs12504009 | rs3956574  | 108 | 1 |
| 20541   | Affected | Male   | 4 | 129993825 | 130147254 | 153430 | rs6847753  | rs2044523  | 25  | 3 |
| 51653   | Affected | Female | 4 | 135125711 | 135396155 | 270445 | rs4446382  | rs6822094  | 34  | 1 |
| 60246   | Affected | Male   | 4 | 135141815 | 135396155 | 254341 | rs2132114  | rs6822094  | 33  | 1 |
| 62818   | Control  | Male   | 4 | 135141815 | 135396155 | 254341 | rs2132114  | rs6822094  | 33  | 1 |
| 60805   | Control  | Female | 4 | 135141815 | 135396155 | 254341 | rs2132114  | rs6822094  | 33  | 1 |
| 51452   | Control  | Male   | 4 | 140709541 | 140816502 | 106962 | rs1026047  | rs8192049  | 44  | 3 |
| 52331   | Affected | Male   | 4 | 157747697 | 158063231 | 315535 | rs939688   | rs10010472 | 54  | 1 |
| 980503  | Affected | Male   | 4 | 162664217 | 162819468 | 155252 | rs13135134 | rs4532194  | 32  | 1 |
| 970879  | Control  | Female | 4 | 165179254 | 165388371 | 209118 | rs4533720  | rs4561891  | 50  | 1 |
| 60895   | Control  | Female | 4 | 169051922 | 169224618 | 172697 | rs9994795  | rs7683178  | 47  | 1 |
| 980654  | Affected | Male   | 4 | 169051922 | 169224618 | 172697 | rs9994795  | rs7683178  | 47  | 1 |
| 20422   | Affected | Female | 4 | 169051922 | 169224618 | 172697 | rs9994795  | rs7683178  | 47  | 1 |
| 62309   | Control  | Male   | 4 | 169051922 | 169224618 | 172697 | rs9994795  | rs7683178  | 47  | 1 |
| 51656   | Control  | Female | 4 | 169051922 | 169224618 | 172697 | rs9994795  | rs7683178  | 47  | 1 |
| 50079   | Affected | Male   | 4 | 169051922 | 169224618 | 172697 | rs9994795  | rs7683178  | 47  | 1 |
| 06D6368 | Control  | Female | 4 | 169051922 | 169298002 | 246081 | rs9994795  | rs4692861  | 60  | 1 |

|         |          |        |   |           |           |        |            |            |     |   |
|---------|----------|--------|---|-----------|-----------|--------|------------|------------|-----|---|
| 52289   | Control  | Female | 4 | 169124671 | 169232743 | 108073 | rs7685473  | rs7694025  | 30  | 3 |
| 70860   | Affected | Male   | 4 | 175712054 | 175847125 | 135072 | rs2877818  | rs1471817  | 41  | 3 |
| 10907   | Affected | Female | 4 | 177243037 | 177348934 | 105898 | rs12641442 | rs4690667  | 14  | 1 |
| 06D6318 | Control  | Male   | 4 | 187566239 | 187766898 | 200660 | rs2167370  | rs11941966 | 57  | 3 |
| 06D6464 | Control  | Male   | 4 | 188927301 | 189222487 | 295187 | rs13148546 | rs11132507 | 56  | 3 |
| 61706   | Affected | Male   | 4 | 156894819 | 156954889 | 60071  | rs6838946  | rs17033585 | 15  | 3 |
| 60816   | Affected | Male   | 4 | 70522949  | 70585964  | 63016  | rs11249452 | rs4694234  | 17  | 1 |
| 51716   | Affected | Male   | 4 | 164154058 | 164232351 | 78294  | rs6536694  | rs11100479 | 15  | 3 |
| 970316  | Affected | Female | 4 | 130080159 | 130159225 | 79067  | rs13149221 | rs172168   | 14  | 1 |
| 61238   | Control  | Male   | 4 | 114955716 | 115035923 | 80208  | rs4446309  | rs7674158  | 20  | 1 |
| 62748   | Control  | Female | 4 | 114955716 | 115035923 | 80208  | rs4446309  | rs7674158  | 20  | 1 |
| 06D6498 | Control  | Female | 4 | 92408613  | 92489733  | 81121  | rs7694618  | rs6841781  | 20  | 3 |
| 785     | Affected | Male   | 4 | 147428854 | 147514578 | 85725  | rs13140054 | rs2679144  | 14  | 3 |
| 990417  | Affected | Male   | 4 | 91895424  | 91983955  | 88532  | rs6833239  | rs6822939  | 20  | 3 |
| 50503   | Affected | Male   | 4 | 87987541  | 88082794  | 95254  | rs13149938 | rs6836128  | 13  | 3 |
| 11116   | Affected | Female | 5 | 10307117  | 11217361  | 910245 | rs2259642  | rs721768   | 253 | 3 |
| 71269   | Control  | Female | 5 | 61453953  | 62068872  | 614920 | rs2910469  | rs16890998 | 75  | 3 |
| 62247   | Control  | Male   | 5 | 109730387 | 110330169 | 599783 | rs17132029 | rs1366331  | 69  | 1 |
| 10540   | Affected | Male   | 5 | 168385055 | 169072475 | 687421 | rs6890327  | rs17736882 | 198 | 3 |
| 70626   | Affected | Male   | 5 | 168397319 | 169057056 | 659738 | rs1059160  | rs2112705  | 183 | 3 |
| 61381   | Control  | Male   | 5 | 80564     | 196534    | 115971 | rs2135917  | rs13436090 | 15  | 3 |
| 60207   | Affected | Male   | 5 | 23425010  | 23920197  | 495188 | rs6861038  | rs1490758  | 76  | 3 |
| 970516  | Control  | Male   | 5 | 34889541  | 34996272  | 106732 | rs4703480  | rs7719119  | 24  | 3 |
| 11404   | Affected | Female | 5 | 36245985  | 36348269  | 102285 | rs6881555  | rs1500218  | 24  | 3 |
| 805     | Affected | Male   | 5 | 38326071  | 38539215  | 213145 | rs2042925  | rs3797161  | 64  | 3 |
| 30806   | Control  | Female | 5 | 58661886  | 58781629  | 119744 | rs35255    | rs1457110  | 51  | 1 |
| 60356   | Affected | Female | 5 | 90009377  | 90254368  | 244992 | rs1033290  | rs3114653  | 58  | 1 |
| 06D6369 | Control  | Male   | 5 | 93574633  | 93898701  | 324069 | rs13163610 | rs6556847  | 54  | 1 |
| 70429   | Control  | Female | 5 | 102188684 | 102461308 | 272625 | rs258247   | rs34813    | 31  | 1 |
| 30624   | Affected | Male   | 5 | 104410795 | 104558803 | 148009 | rs6872400  | rs7709938  | 27  | 1 |
| 61542   | Affected | Male   | 5 | 104410795 | 104562047 | 151253 | rs6872400  | rs974244   | 28  | 1 |
| con056  | Control  | Female | 5 | 104460010 | 104562047 | 102038 | rs10057612 | rs974244   | 17  | 1 |

|        |          |        |   |           |           |        |            |            |    |   |
|--------|----------|--------|---|-----------|-----------|--------|------------|------------|----|---|
| 20226  | Affected | Male   | 5 | 104460010 | 104562047 | 102038 | rs10057612 | rs974244   | 17 | 1 |
| 70552  | Affected | Male   | 5 | 109783199 | 110084156 | 300958 | rs311696   | rs151784   | 31 | 1 |
| 61345  | Control  | Male   | 5 | 157105919 | 157352660 | 246742 | rs6895563  | rs11135023 | 58 | 3 |
| 62688  | Control  | Female | 5 | 177288649 | 177456843 | 168195 | rs4298268  | rs12652932 | 29 | 3 |
| 62688  | Control  | Female | 5 | 177771474 | 177932053 | 160580 | rs11746864 | rs262065   | 61 | 3 |
| 51302  | Control  | Male   | 5 | 180441221 | 180623543 | 182323 | rs13167249 | rs1279912  | 40 | 3 |
| 20229  | Affected | Male   | 5 | 59758639  | 59809368  | 50730  | rs37692    | rs1423473  | 17 | 3 |
| 20346  | Affected | Female | 5 | 59758639  | 59809368  | 50730  | rs37692    | rs1423473  | 17 | 3 |
| 61011  | Control  | Female | 5 | 59758639  | 59809368  | 50730  | rs37692    | rs1423473  | 17 | 3 |
| 11083  | Affected | Male   | 5 | 1395714   | 1448077   | 52364  | rs31489    | rs40184    | 14 | 3 |
| 51672  | Affected | Female | 5 | 104460010 | 104514704 | 54695  | rs10057612 | rs7701212  | 11 | 1 |
| 970232 | Control  | Male   | 5 | 1204161   | 1260527   | 56367  | rs3922757  | rs6554660  | 13 | 4 |
| 50052  | Affected | Male   | 5 | 107276507 | 107333438 | 56932  | rs1433050  | rs6867577  | 29 | 1 |
| 1679   | Affected | Male   | 5 | 104460010 | 104518786 | 58777  | rs10057612 | rs10043572 | 12 | 1 |
| 10540  | Affected | Male   | 5 | 104460010 | 104518786 | 58777  | rs10057612 | rs10043572 | 12 | 1 |
| 20528  | Affected | Male   | 5 | 104460010 | 104518786 | 58777  | rs10057612 | rs10043572 | 12 | 1 |
| 20541  | Affected | Male   | 5 | 104460010 | 104518786 | 58777  | rs10057612 | rs10043572 | 12 | 1 |
| 20614  | Affected | Female | 5 | 104460010 | 104518786 | 58777  | rs10057612 | rs10043572 | 12 | 1 |
| 40006  | Affected | Male   | 5 | 104460010 | 104518786 | 58777  | rs10057612 | rs10043572 | 12 | 1 |
| 52477  | Affected | Male   | 5 | 104460010 | 104518786 | 58777  | rs10057612 | rs10043572 | 12 | 1 |
| 61463  | Affected | Male   | 5 | 104460010 | 104518786 | 58777  | rs10057612 | rs10043572 | 12 | 1 |
| 61642  | Affected | Male   | 5 | 104460010 | 104518786 | 58777  | rs10057612 | rs10043572 | 12 | 1 |
| 70583  | Affected | Female | 5 | 104460010 | 104518786 | 58777  | rs10057612 | rs10043572 | 12 | 1 |
| 960200 | Affected | Male   | 5 | 104460010 | 104518786 | 58777  | rs10057612 | rs10043572 | 12 | 1 |
| 52574  | Control  | Male   | 5 | 104460010 | 104518786 | 58777  | rs10057612 | rs10043572 | 12 | 1 |
| 60946  | Control  | Male   | 5 | 104460010 | 104518786 | 58777  | rs10057612 | rs10043572 | 12 | 1 |
| 62547  | Control  | Female | 5 | 104460010 | 104518786 | 58777  | rs10057612 | rs10043572 | 12 | 1 |
| 62586  | Control  | Male   | 5 | 104460010 | 104518786 | 58777  | rs10057612 | rs10043572 | 12 | 1 |
| con017 | Control  | Male   | 5 | 104460010 | 104518786 | 58777  | rs10057612 | rs10043572 | 12 | 1 |
| 31009  | Control  | Male   | 5 | 110862078 | 110923874 | 61797  | rs2059041  | rs247544   | 14 | 1 |
| 20604  | Affected | Female | 5 | 151269891 | 151337257 | 67367  | rs1465555  | rs426783   | 19 | 3 |
| 20689  | Affected | Female | 5 | 115569462 | 115637451 | 67990  | rs6896019  | rs10071906 | 11 | 1 |

|         |          |        |   |           |           |         |            |            |     |   |
|---------|----------|--------|---|-----------|-----------|---------|------------|------------|-----|---|
| 70435   | Affected | Male   | 5 | 151260601 | 151337257 | 76657   | rs2964607  | rs426783   | 20  | 3 |
| 61647   | Affected | Female | 5 | 90215480  | 90294340  | 78861   | rs6893164  | rs12522571 | 22  | 1 |
| 71266   | Control  | Female | 5 | 33612359  | 33698773  | 86415   | rs3813474  | rs12516835 | 41  | 3 |
| 70591   | Affected | Male   | 5 | 109723958 | 109814957 | 91000   | rs6594447  | rs11748623 | 16  | 1 |
| 61158   | Control  | Female | 5 | 647083    | 738748    | 91666   | rs11739663 | rs386057   | 17  | 3 |
| 51371   | Affected | Male   | 6 | 47748056  | 49783503  | 2035448 | rs869002   | rs189664   | 318 | 3 |
| 62907   | Affected | Male   | 6 | 48429369  | 50454502  | 2025134 | rs6921664  | rs1492612  | 286 | 3 |
| 60714   | Control  | Female | 6 | 80936857  | 81764229  | 827373  | rs6931421  | rs7744074  | 157 | 3 |
| 70869   | Affected | Male   | 6 | 161988422 | 162491345 | 502924  | rs10945764 | rs713054   | 178 | 1 |
| 1502    | Affected | Male   | 6 | 162591329 | 163106351 | 515023  | rs7770626  | rs4709649  | 148 | 3 |
| 06D7007 | Control  | Female | 6 | 17696137  | 17872258  | 176122  | rs942465   | rs1044654  | 27  | 3 |
| 20600   | Affected | Male   | 6 | 32677669  | 32785890  | 108222  | rs477515   | rs9275563  | 60  | 1 |
| 61464   | Control  | Female | 6 | 34836231  | 35001376  | 165146  | rs9462014  | rs2504163  | 20  | 3 |
| 20474   | Affected | Male   | 6 | 38621152  | 39041279  | 420128  | rs2748156  | rs1332012  | 114 | 1 |
| 61873   | Affected | Female | 6 | 39041279  | 39148632  | 107354  | rs1332012  | rs2235868  | 41  | 1 |
| 11139   | Affected | Male   | 6 | 47927523  | 48176833  | 249311  | rs564351   | rs10948397 | 48  | 3 |
| 40580   | Affected | Female | 6 | 66025960  | 66203540  | 177581  | rs536372   | rs12192936 | 38  | 1 |
| 20227   | Affected | Male   | 6 | 66025960  | 66203540  | 177581  | rs536372   | rs12192936 | 38  | 1 |
| 51444   | Affected | Male   | 6 | 82839391  | 82940555  | 101165  | rs7454792  | rs197246   | 24  | 3 |
| 11288   | Affected | Male   | 6 | 82839391  | 82940555  | 101165  | rs7454792  | rs197246   | 24  | 3 |
| 30976   | Control  | Female | 6 | 106683679 | 106930232 | 246554  | rs7761791  | rs3851212  | 57  | 3 |
| 52044   | Affected | Male   | 6 | 119023320 | 119138872 | 115553  | rs13220480 | rs11153771 | 26  | 3 |
| 60886   | Affected | Male   | 6 | 125063391 | 125214187 | 150797  | rs9388359  | rs1409294  | 47  | 3 |
| 41991   | Affected | Male   | 6 | 129410496 | 129555141 | 144646  | rs11154461 | rs9492268  | 25  | 1 |
| 62251   | Control  | Male   | 6 | 131771552 | 131939901 | 168350  | rs9483275  | rs2246012  | 36  | 3 |
| 2089    | Affected | Male   | 6 | 135889916 | 136079920 | 190005  | rs9389295  | rs6930057  | 27  | 3 |
| 1352    | Affected | Male   | 6 | 161600834 | 161734897 | 134064  | rs3823058  | rs12210160 | 38  | 4 |
| 61205   | Control  | Female | 6 | 162379561 | 162611408 | 231848  | rs7738197  | rs11966606 | 90  | 1 |
| 52228   | Control  | Female | 6 | 162403944 | 162611408 | 207465  | rs10046325 | rs11966606 | 78  | 1 |
| 980654  | Affected | Male   | 6 | 162622524 | 162824155 | 201632  | rs9365397  | rs4493732  | 77  | 3 |
| 52213   | Affected | Male   | 6 | 162629938 | 162903833 | 273896  | rs9364646  | rs2846561  | 105 | 1 |
| 62884   | Affected | Male   | 6 | 162633417 | 162834976 | 201560  | rs9458499  | rs9346917  | 76  | 3 |

|         |          |        |   |           |           |        |            |            |     |   |
|---------|----------|--------|---|-----------|-----------|--------|------------|------------|-----|---|
| 62662   | Control  | Female | 6 | 162636531 | 162834976 | 198446 | rs952388   | rs9346917  | 75  | 3 |
| 52262   | Control  | Male   | 6 | 162636531 | 162951722 | 315192 | rs952388   | rs9364667  | 111 | 1 |
| 70056   | Affected | Male   | 6 | 162637688 | 162824155 | 186468 | rs12197815 | rs4493732  | 72  | 3 |
| 70038   | Affected | Male   | 6 | 162637688 | 162829925 | 192238 | rs12197815 | rs4709632  | 73  | 3 |
| 20230   | Affected | Male   | 6 | 162637688 | 162829925 | 192238 | rs12197815 | rs4709632  | 73  | 3 |
| 970778  | Control  | Female | 6 | 162637688 | 162834976 | 197289 | rs12197815 | rs9346917  | 74  | 3 |
| 1249    | Affected | Male   | 6 | 162637688 | 162834976 | 197289 | rs12197815 | rs9346917  | 74  | 3 |
| 11127   | Affected | Male   | 6 | 162637688 | 162834976 | 197289 | rs12197815 | rs9346917  | 74  | 3 |
| 11315   | Affected | Female | 6 | 162637688 | 162834976 | 197289 | rs12197815 | rs9346917  | 74  | 3 |
| 61470   | Affected | Male   | 6 | 162685079 | 162789187 | 104109 | rs6455810  | rs4708959  | 40  | 1 |
| 61272   | Control  | Male   | 6 | 162824155 | 162956501 | 132347 | rs4493732  | rs1893119  | 40  | 1 |
| 06D6760 | Control  | Male   | 6 | 162886421 | 163119757 | 233337 | rs2846463  | rs13202401 | 50  | 3 |
| 71238   | Control  | Female | 6 | 167524137 | 167688151 | 164015 | rs6904892  | rs9457309  | 63  | 3 |
| 61055   | Control  | Male   | 6 | 167534723 | 167690726 | 156004 | rs12665391 | rs2981988  | 62  | 3 |
| 06D6927 | Control  | Female | 6 | 168078929 | 168301695 | 222767 | rs3800533  | rs1809698  | 103 | 3 |
| 980185  | Control  | Male   | 6 | 168078929 | 168319676 | 240748 | rs3800533  | rs9346529  | 109 | 3 |
| 70038   | Affected | Male   | 6 | 168078929 | 168319676 | 240748 | rs3800533  | rs9346529  | 109 | 3 |
| 11357   | Affected | Female | 6 | 168078929 | 168326598 | 247670 | rs3800533  | rs9455975  | 116 | 3 |
| con019  | Control  | Female | 6 | 168078929 | 168334983 | 256055 | rs3800533  | rs9283861  | 117 | 3 |
| 60206   | Affected | Male   | 6 | 168078929 | 168334983 | 256055 | rs3800533  | rs9283861  | 117 | 3 |
| 70177   | Affected | Female | 6 | 168078929 | 168334983 | 256055 | rs3800533  | rs9283861  | 117 | 3 |
| 30803   | Affected | Male   | 6 | 168078929 | 168340091 | 261163 | rs3800533  | rs6918784  | 120 | 3 |
| 61563   | Control  | Male   | 6 | 168078929 | 168340091 | 261163 | rs3800533  | rs6918784  | 120 | 3 |
| 1246    | Affected | Male   | 6 | 168078929 | 168340091 | 261163 | rs3800533  | rs6918784  | 120 | 3 |
| 20654   | Affected | Male   | 6 | 168078929 | 168340091 | 261163 | rs3800533  | rs6918784  | 120 | 3 |
| 60704   | Control  | Male   | 6 | 168078929 | 168340091 | 261163 | rs3800533  | rs6918784  | 120 | 3 |
| 06D6601 | Control  | Male   | 6 | 168078929 | 168342182 | 263254 | rs3800533  | rs2306286  | 121 | 3 |
| 62732   | Affected | Female | 6 | 168078929 | 168342182 | 263254 | rs3800533  | rs2306286  | 121 | 3 |
| 50858   | Affected | Female | 6 | 168078929 | 168342182 | 263254 | rs3800533  | rs2306286  | 121 | 3 |
| 51269   | Affected | Male   | 6 | 168078929 | 168342182 | 263254 | rs3800533  | rs2306286  | 121 | 3 |
| 62309   | Control  | Male   | 6 | 168078929 | 168342182 | 263254 | rs3800533  | rs2306286  | 121 | 3 |
| 61257   | Control  | Male   | 6 | 168078929 | 168342182 | 263254 | rs3800533  | rs2306286  | 121 | 3 |

|        |          |        |   |           |           |        |            |            |     |   |
|--------|----------|--------|---|-----------|-----------|--------|------------|------------|-----|---|
| 20633  | Affected | Male   | 6 | 168078929 | 168342182 | 263254 | rs3800533  | rs2306286  | 121 | 3 |
| 70895  | Affected | Female | 6 | 168078929 | 168342182 | 263254 | rs3800533  | rs2306286  | 121 | 3 |
| 62943  | Control  | Female | 6 | 168078929 | 168342182 | 263254 | rs3800533  | rs2306286  | 121 | 3 |
| 1825   | Affected | Female | 6 | 168078929 | 168342182 | 263254 | rs3800533  | rs2306286  | 121 | 3 |
| 70492  | Affected | Female | 6 | 168086687 | 168319676 | 232990 | rs1132306  | rs9346529  | 108 | 3 |
| 20687  | Affected | Female | 6 | 168086687 | 168340091 | 253405 | rs1132306  | rs6918784  | 119 | 3 |
| 20541  | Affected | Male   | 6 | 168086687 | 168340091 | 253405 | rs1132306  | rs6918784  | 119 | 3 |
| 70053  | Control  | Male   | 6 | 168086687 | 168342182 | 255496 | rs1132306  | rs2306286  | 120 | 3 |
| 980001 | Control  | Male   | 6 | 168086687 | 168342182 | 255496 | rs1132306  | rs2306286  | 120 | 3 |
| 60933  | Control  | Female | 6 | 168086687 | 168342182 | 255496 | rs1132306  | rs2306286  | 120 | 3 |
| 62551  | Control  | Female | 6 | 168086687 | 168342182 | 255496 | rs1132306  | rs2306286  | 120 | 3 |
| 30856  | Control  | Male   | 6 | 168086687 | 168342182 | 255496 | rs1132306  | rs2306286  | 120 | 3 |
| 52546  | Affected | Male   | 6 | 168086687 | 168342182 | 255496 | rs1132306  | rs2306286  | 120 | 3 |
| 60086  | Control  | Female | 6 | 168086687 | 168342182 | 255496 | rs1132306  | rs2306286  | 120 | 3 |
| 30790  | Control  | Male   | 6 | 168091860 | 168293188 | 201329 | rs9364371  | rs13220548 | 93  | 3 |
| 50080  | Affected | Female | 6 | 168091860 | 168340091 | 248232 | rs9364371  | rs6918784  | 118 | 3 |
| 71133  | Affected | Female | 6 | 168091860 | 168342182 | 250323 | rs9364371  | rs2306286  | 119 | 3 |
| 70626  | Affected | Male   | 6 | 168091860 | 168342182 | 250323 | rs9364371  | rs2306286  | 119 | 3 |
| 31008  | Control  | Female | 6 | 168091860 | 168342182 | 250323 | rs9364371  | rs2306286  | 119 | 3 |
| 980172 | Affected | Female | 6 | 168091860 | 168342182 | 250323 | rs9364371  | rs2306286  | 119 | 3 |
| con047 | Control  | Female | 6 | 168122631 | 168342182 | 219552 | rs9346516  | rs2306286  | 116 | 3 |
| con064 | Control  | Female | 6 | 168122631 | 168342182 | 219552 | rs9346516  | rs2306286  | 116 | 3 |
| con070 | Control  | Female | 6 | 168183489 | 168319676 | 136188 | rs2073632  | rs9346529  | 69  | 3 |
| 20600  | Affected | Male   | 6 | 168322151 | 168781519 | 459369 | rs7751205  | rs4708481  | 136 | 3 |
| 61755  | Control  | Male   | 6 | 161853925 | 161904684 | 50760  | rs16892673 | rs6909754  | 32  | 3 |
| 70414  | Control  | Female | 6 | 38398246  | 38450140  | 51895  | rs16890552 | rs4711542  | 14  | 1 |
| 61649  | Control  | Female | 6 | 119104805 | 119157274 | 52470  | rs13214017 | rs12190347 | 21  | 1 |
| 52436  | Control  | Female | 6 | 62683938  | 62740028  | 56091  | rs16900602 | rs1516709  | 16  | 3 |
| 10160  | Affected | Male   | 6 | 161848346 | 161904684 | 56339  | rs508605   | rs6909754  | 36  | 3 |
| 51713  | Affected | Male   | 6 | 10577812  | 10636780  | 58969  | rs645297   | rs560194   | 36  | 1 |
| 61088  | Control  | Male   | 6 | 10577812  | 10636780  | 58969  | rs645297   | rs560194   | 36  | 1 |
| 50079  | Affected | Male   | 6 | 35610180  | 35670618  | 60439  | rs9380516  | rs3798346  | 12  | 3 |

|         |          |        |   |           |           |         |            |            |     |   |
|---------|----------|--------|---|-----------|-----------|---------|------------|------------|-----|---|
| 20371   | Affected | Male   | 6 | 10575681  | 10636780  | 61100   | rs796102   | rs560194   | 38  | 1 |
| 11081   | Affected | Male   | 6 | 162824155 | 162886421 | 62267   | rs4493732  | rs2846463  | 20  | 1 |
| 70746   | Affected | Male   | 6 | 162824155 | 162886421 | 62267   | rs4493732  | rs2846463  | 20  | 1 |
| 51880   | Control  | Female | 6 | 10577812  | 10640172  | 62361   | rs645297   | rs681282   | 37  | 1 |
| 20399   | Affected | Female | 6 | 10572011  | 10636780  | 64770   | rs501436   | rs560194   | 40  | 1 |
| 11357   | Affected | Female | 6 | 169768336 | 169833634 | 65299   | rs12111411 | rs7750758  | 12  | 1 |
| 50960   | Affected | Male   | 6 | 65996954  | 66065824  | 68871   | rs2788907  | rs9354219  | 14  | 1 |
| 62160   | Affected | Female | 6 | 89348510  | 89417599  | 69090   | rs1923416  | rs2756382  | 14  | 3 |
| 62356   | Control  | Male   | 6 | 168588370 | 168660249 | 71880   | rs7741920  | rs2763239  | 23  | 1 |
| 51438   | Affected | Male   | 6 | 2154576   | 2227746   | 73171   | rs234915   | rs12664420 | 16  | 3 |
| 70282   | Control  | Male   | 6 | 162431244 | 162506056 | 74813   | rs9347586  | rs2849576  | 26  | 1 |
| 1352    | Affected | Male   | 6 | 161521152 | 161597624 | 76473   | rs3798923  | rs3757031  | 33  | 3 |
| 72609   | Affected | Male   | 6 | 124313139 | 124391083 | 77945   | rs235667   | rs17086515 | 30  | 1 |
| 61053   | Control  | Male   | 6 | 124313139 | 124391083 | 77945   | rs235667   | rs17086515 | 30  | 1 |
| 980175  | Control  | Male   | 6 | 124313139 | 124391083 | 77945   | rs235667   | rs17086515 | 30  | 1 |
| 51760   | Affected | Male   | 6 | 44971084  | 45054441  | 83358   | rs7754378  | rs2396369  | 18  | 3 |
| 60363   | Control  | Female | 6 | 168229155 | 168316008 | 86854   | rs10455755 | rs4708679  | 48  | 3 |
| 61879   | Affected | Male   | 6 | 31468368  | 31559455  | 91088   | rs2523477  | rs2905747  | 66  | 3 |
| 70597   | Affected | Male   | 6 | 31468368  | 31559455  | 91088   | rs2523477  | rs2905747  | 66  | 3 |
| 70245   | Affected | Male   | 6 | 31468368  | 31559455  | 91088   | rs2523477  | rs2905747  | 66  | 1 |
| 61701   | Control  | Female | 6 | 31468368  | 31559455  | 91088   | rs2523477  | rs2905747  | 66  | 3 |
| 06D6467 | Control  | Female | 6 | 31468368  | 31559455  | 91088   | rs2523477  | rs2905747  | 66  | 3 |
| 20498   | Affected | Male   | 6 | 168224721 | 168316008 | 91288   | rs7753203  | rs4708679  | 49  | 3 |
| 52497   | Control  | Female | 6 | 162852454 | 162951722 | 99269   | rs13194743 | rs9364667  | 31  | 1 |
| 20506   | Affected | Male   | 7 | 38759768  | 39260567  | 500800  | rs3779127  | rs10242061 | 97  | 3 |
| 62807   | Control  | Female | 7 | 87999670  | 89718885  | 1719216 | rs6977770  | rs10240790 | 371 | 3 |
| 62376   | Affected | Male   | 7 | 88186382  | 89722103  | 1535722 | rs1966296  | rs11563921 | 339 | 3 |
| 31077   | Affected | Female | 7 | 88186382  | 89722103  | 1535722 | rs1966296  | rs11563921 | 339 | 3 |
| 06D6334 | Control  | Female | 7 | 88494958  | 89718885  | 1223928 | rs2040524  | rs10240790 | 260 | 3 |
| 970881  | Control  | Female | 7 | 111298102 | 112083170 | 785069  | rs739617   | rs1989835  | 180 | 3 |
| 61025   | Affected | Male   | 7 | 156775368 | 157674626 | 899259  | rs12533310 | rs10244830 | 209 | 3 |
| 51716   | Affected | Male   | 7 | 3899448   | 4055402   | 155955  | rs6971828  | rs17134285 | 36  | 1 |



|         |          |        |   |          |          |        |            |            |     |   |
|---------|----------|--------|---|----------|----------|--------|------------|------------|-----|---|
| 62751   | Affected | Male   | 7 | 5361477  | 5506484  | 145008 | rs4724592  | rs7799622  | 27  | 3 |
| 11378   | Affected | Male   | 7 | 5700983  | 5894482  | 193500 | rs1468996  | rs6463522  | 22  | 3 |
| 30928   | Control  | Male   | 7 | 7006701  | 7234956  | 228256 | rs4074751  | rs10259085 | 56  | 3 |
| 06D6469 | Control  | Female | 7 | 8151486  | 8480452  | 328967 | rs2110332  | rs1029523  | 112 | 3 |
| 960455  | Affected | Female | 7 | 15091272 | 15384424 | 293153 | rs17168654 | rs4256491  | 74  | 3 |
| 50820   | Affected | Male   | 7 | 16135027 | 16363877 | 228851 | rs10269890 | rs2178598  | 53  | 1 |
| 60468   | Affected | Male   | 7 | 17047682 | 17396529 | 348848 | rs518136   | rs7777586  | 72  | 3 |
| 60616   | Affected | Male   | 7 | 20517504 | 20619778 | 102275 | rs1012869  | rs12666732 | 36  | 1 |
| 61558   | Affected | Male   | 7 | 26136637 | 26301955 | 165319 | rs2057761  | rs12538280 | 22  | 3 |
| 06D6206 | Control  | Female | 7 | 40269809 | 40510036 | 240228 | rs6952552  | rs6947887  | 30  | 1 |
| 20370   | Affected | Female | 7 | 40269809 | 40510036 | 240228 | rs6952552  | rs6947887  | 30  | 1 |
| 980201  | Affected | Male   | 7 | 40269809 | 40510036 | 240228 | rs6952552  | rs6947887  | 30  | 1 |
| 52233   | Affected | Male   | 7 | 57212608 | 57643772 | 431165 | rs13240443 | rs7801211  | 62  | 3 |
| con079  | Control  | Male   | 7 | 64316996 | 64593616 | 276621 | rs2900856  | rs10274919 | 29  | 1 |
| con076  | Control  | Female | 7 | 64316996 | 64593616 | 276621 | rs2900856  | rs10274919 | 29  | 1 |
| 52531   | Affected | Male   | 7 | 64316996 | 64593616 | 276621 | rs2900856  | rs10274919 | 29  | 1 |
| 61651   | Control  | Male   | 7 | 64316996 | 64593616 | 276621 | rs2900856  | rs10274919 | 29  | 1 |
| 70109   | Affected | Male   | 7 | 64316996 | 64593616 | 276621 | rs2900856  | rs10274919 | 29  | 1 |
| con086  | Control  | Female | 7 | 64316996 | 64593616 | 276621 | rs2900856  | rs10274919 | 29  | 1 |
| 70049   | Affected | Male   | 7 | 64316996 | 64593616 | 276621 | rs2900856  | rs10274919 | 29  | 1 |
| 51880   | Control  | Female | 7 | 64316996 | 64593616 | 276621 | rs2900856  | rs10274919 | 29  | 1 |
| 20506   | Affected | Male   | 7 | 64316996 | 64593616 | 276621 | rs2900856  | rs10274919 | 29  | 1 |
| 20064   | Affected | Male   | 7 | 64316996 | 64593616 | 276621 | rs2900856  | rs10274919 | 29  | 1 |
| 61152   | Control  | Female | 7 | 64316996 | 64593616 | 276621 | rs2900856  | rs10274919 | 29  | 1 |
| 40207   | Affected | Male   | 7 | 64316996 | 64593616 | 276621 | rs2900856  | rs10274919 | 29  | 1 |
| 20526   | Affected | Male   | 7 | 64316996 | 64593616 | 276621 | rs2900856  | rs10274919 | 29  | 1 |
| 51653   | Affected | Female | 7 | 64316996 | 64593616 | 276621 | rs2900856  | rs10274919 | 29  | 1 |
| 60222   | Control  | Female | 7 | 64316996 | 64593616 | 276621 | rs2900856  | rs10274919 | 29  | 3 |
| 50083   | Affected | Male   | 7 | 64316996 | 64593616 | 276621 | rs2900856  | rs10274919 | 29  | 3 |
| 51223   | Control  | Male   | 7 | 64357740 | 64532789 | 175050 | rs13229781 | rs13234392 | 21  | 3 |
| 30891   | Control  | Male   | 7 | 70287481 | 70396256 | 108776 | rs1796089  | rs4719106  | 40  | 1 |
| 51656   | Control  | Female | 7 | 80110504 | 80326004 | 215501 | rs1527479  | rs10954378 | 48  | 3 |

|         |          |        |   |           |           |        |            |            |     |   |
|---------|----------|--------|---|-----------|-----------|--------|------------|------------|-----|---|
| 06D6334 | Control  | Female | 7 | 87988734  | 88211532  | 222799 | rs916654   | rs2519910  | 43  | 3 |
| 06D6334 | Control  | Female | 7 | 88235577  | 88485794  | 250218 | rs7801611  | rs6944177  | 63  | 4 |
| con026  | Control  | Male   | 7 | 88485794  | 88924574  | 438781 | rs6944177  | rs2373919  | 116 | 1 |
| 70504   | Control  | Female | 7 | 89395484  | 89547717  | 152234 | rs7801279  | rs10952990 | 45  | 1 |
| 06D6612 | Control  | Female | 7 | 93625349  | 93819975  | 194627 | rs7357193  | rs10464587 | 24  | 1 |
| 61753   | Affected | Male   | 7 | 93625349  | 93819975  | 194627 | rs7357193  | rs10464587 | 24  | 1 |
| 06D6708 | Control  | Male   | 7 | 93685640  | 93819975  | 134336 | rs10277051 | rs10464587 | 22  | 1 |
| 61572   | Control  | Male   | 7 | 100715342 | 100895793 | 180452 | rs4727484  | rs10276579 | 30  | 3 |
| 73054   | Control  | Female | 7 | 100715342 | 100914175 | 198834 | rs4727484  | rs13232646 | 35  | 3 |
| 11515   | Affected | Male   | 7 | 100747270 | 100868518 | 121249 | rs4729686  | rs4727494  | 24  | 3 |
| 62930   | Affected | Male   | 7 | 100747270 | 100868518 | 121249 | rs4729686  | rs4727494  | 24  | 3 |
| con088  | Control  | Female | 7 | 100747270 | 100914175 | 166906 | rs4729686  | rs13232646 | 33  | 3 |
| 60837   | Control  | Male   | 7 | 100747270 | 100914175 | 166906 | rs4729686  | rs13232646 | 33  | 3 |
| 62229   | Control  | Male   | 7 | 100747270 | 100914175 | 166906 | rs4729686  | rs13232646 | 33  | 3 |
| 11233   | Affected | Male   | 7 | 100747270 | 100914175 | 166906 | rs4729686  | rs13232646 | 33  | 3 |
| 20458   | Affected | Male   | 7 | 100747270 | 100926144 | 178875 | rs4729686  | rs885501   | 36  | 3 |
| 61748   | Affected | Male   | 7 | 100755083 | 100914175 | 159093 | rs7799285  | rs13232646 | 32  | 3 |
| 10734   | Affected | Male   | 7 | 100755083 | 100914175 | 159093 | rs7799285  | rs13232646 | 32  | 3 |
| 970778  | Control  | Female | 7 | 100755083 | 100914175 | 159093 | rs7799285  | rs13232646 | 32  | 3 |
| 51857   | Affected | Male   | 7 | 100755083 | 100914175 | 159093 | rs7799285  | rs13232646 | 32  | 3 |
| 970806  | Control  | Female | 7 | 100755083 | 100914175 | 159093 | rs7799285  | rs13232646 | 32  | 3 |
| 11404   | Affected | Female | 7 | 100755083 | 100914175 | 159093 | rs7799285  | rs13232646 | 32  | 3 |
| 50585   | Control  | Male   | 7 | 100755083 | 100914175 | 159093 | rs7799285  | rs13232646 | 32  | 3 |
| 51729   | Affected | Male   | 7 | 100755083 | 100914175 | 159093 | rs7799285  | rs13232646 | 32  | 3 |
| 52184   | Affected | Male   | 7 | 100782577 | 100914175 | 131599 | rs4727485  | rs13232646 | 27  | 3 |
| 50953   | Control  | Female | 7 | 100810906 | 100914175 | 103270 | rs10254516 | rs13232646 | 22  | 3 |
| 20478   | Affected | Female | 7 | 103900953 | 104134190 | 233238 | rs6465992  | rs6952413  | 79  | 3 |
| 30724   | Control  | Male   | 7 | 110810558 | 111034187 | 223630 | rs17158544 | rs2613611  | 25  | 1 |
| 61548   | Affected | Male   | 7 | 110810558 | 111065681 | 255124 | rs17158544 | rs11978935 | 26  | 1 |
| 61136   | Affected | Male   | 7 | 110866148 | 110987007 | 120860 | rs38752    | rs12705779 | 14  | 1 |
| 30856   | Control  | Male   | 7 | 110900089 | 111017480 | 117392 | rs12671676 | rs2613596  | 14  | 1 |
| 970806  | Control  | Female | 7 | 110944768 | 111138748 | 193981 | rs2613589  | rs10487331 | 32  | 1 |

|         |          |        |   |           |           |        |            |            |    |   |
|---------|----------|--------|---|-----------|-----------|--------|------------|------------|----|---|
| 70856   | Affected | Female | 7 | 111015409 | 111116572 | 101164 | rs17158652 | rs10236334 | 20 | 1 |
| 960120  | Affected | Female | 7 | 111015409 | 111116572 | 101164 | rs17158652 | rs10236334 | 20 | 1 |
| 52180   | Affected | Male   | 7 | 120751201 | 120947500 | 196300 | rs3757552  | rs1881374  | 25 | 3 |
| 06D6442 | Control  | Female | 7 | 124235477 | 124361763 | 126287 | rs2896359  | rs10264288 | 28 | 1 |
| 50167   | Affected | Male   | 7 | 133137377 | 133270514 | 133138 | rs10488174 | rs4731986  | 18 | 1 |
| 70895   | Affected | Female | 7 | 133397304 | 133501403 | 104100 | rs4731997  | rs728579   | 18 | 1 |
| 970251  | Control  | Male   | 7 | 136653944 | 136971345 | 317402 | rs322335   | rs3778789  | 62 | 3 |
| 61420   | Control  | Male   | 7 | 136653944 | 136987112 | 333169 | rs322335   | rs10273400 | 65 | 3 |
| 71427   | Affected | Female | 7 | 143206916 | 143505123 | 298208 | rs11768025 | rs10487624 | 54 | 3 |
| 61055   | Control  | Male   | 7 | 143705862 | 143810267 | 104406 | rs720475   | rs10255314 | 29 | 3 |
| 62732   | Affected | Female | 7 | 145884986 | 146314832 | 429847 | rs9640471  | rs4368897  | 85 | 1 |
| 11085   | Affected | Female | 7 | 146193286 | 146359185 | 165900 | rs7811958  | rs1524347  | 39 | 1 |
| 61336   | Affected | Female | 7 | 152961994 | 153239054 | 277061 | rs4595033  | rs12673076 | 32 | 3 |
| 70092   | Affected | Male   | 7 | 152961994 | 153239054 | 277061 | rs4595033  | rs12673076 | 32 | 3 |
| 06D6906 | Control  | Female | 7 | 152961994 | 153239054 | 277061 | rs4595033  | rs12673076 | 32 | 3 |
| 52566   | Control  | Female | 7 | 38285115  | 38337999  | 52885  | rs7782269  | rs2534575  | 44 | 1 |
| 10997   | Affected | Male   | 7 | 3656098   | 3710081   | 53984  | rs2614956  | rs10256504 | 25 | 1 |
| 62228   | Affected | Male   | 7 | 146168694 | 146222821 | 54128  | rs11984177 | rs10216156 | 25 | 1 |
| 60807   | Affected | Male   | 7 | 110509036 | 110563273 | 54238  | rs214897   | rs12705757 | 10 | 1 |
| 52499   | Affected | Male   | 7 | 38254795  | 38309522  | 54728  | rs2240825  | rs2392545  | 19 | 1 |
| con072  | Control  | Male   | 7 | 38254795  | 38309610  | 54816  | rs2240825  | rs2392546  | 20 | 1 |
| 52030   | Control  | Female | 7 | 38285115  | 38340056  | 54942  | rs7782269  | rs2534578  | 45 | 1 |
| 70368   | Affected | Male   | 7 | 38285115  | 38341222  | 56108  | rs7782269  | rs2240853  | 46 | 1 |
| 52499   | Affected | Male   | 7 | 11314044  | 11370519  | 56476  | rs2189344  | rs10257877 | 20 | 3 |
| 51368   | Affected | Male   | 7 | 17914612  | 17974835  | 60224  | rs17138418 | rs4470902  | 15 | 3 |
| 52338   | Affected | Male   | 7 | 88459393  | 88521153  | 61761  | rs10486891 | rs967579   | 14 | 3 |
| 40006   | Affected | Male   | 7 | 38285115  | 38346971  | 61857  | rs7782269  | rs733905   | 47 | 1 |
| 60886   | Affected | Male   | 7 | 38285115  | 38346971  | 61857  | rs7782269  | rs733905   | 47 | 1 |
| 60332   | Control  | Female | 7 | 157427075 | 157495433 | 68359  | rs920023   | rs1001099  | 26 | 3 |
| 31030   | Affected | Male   | 7 | 110563273 | 110645504 | 82232  | rs12705757 | rs214467   | 20 | 1 |
| 70071   | Affected | Female | 7 | 119885540 | 119967907 | 82368  | rs7809257  | rs10488302 | 16 | 1 |
| 52323   | Control  | Female | 7 | 38254795  | 38341222  | 86428  | rs2240825  | rs2240853  | 47 | 1 |

|         |          |        |   |           |           |        |            |            |     |   |
|---------|----------|--------|---|-----------|-----------|--------|------------|------------|-----|---|
| 72280   | Affected | Female | 7 | 111027549 | 111116572 | 89024  | rs11979526 | rs10236334 | 16  | 1 |
| 30804   | Control  | Female | 7 | 110944768 | 111034187 | 89420  | rs2613589  | rs2613611  | 17  | 1 |
| 980182  | Affected | Male   | 7 | 157223935 | 157317812 | 93878  | rs867923   | rs9654707  | 25  | 3 |
| 52519   | Affected | Female | 7 | 136654649 | 136753038 | 98390  | rs322334   | rs1647189  | 22  | 3 |
| 50164   | Affected | Female | 7 | 117704955 | 117804083 | 99129  | rs41923    | rs2189127  | 24  | 1 |
| 71208   | Affected | Male   | 7 | 117704955 | 117804083 | 99129  | rs41923    | rs2189127  | 24  | 1 |
| 70414   | Control  | Female | 7 | 117704955 | 117804083 | 99129  | rs41923    | rs2189127  | 24  | 1 |
| 71128   | Control  | Female | 8 | 1764978   | 2309171   | 544194 | rs17064297 | rs17063040 | 258 | 3 |
| 60924   | Control  | Female | 8 | 138771563 | 139340184 | 568622 | rs4389979  | rs16908717 | 192 | 3 |
| 70790   | Affected | Male   | 8 | 1016907   | 1388391   | 371485 | rs2123055  | rs7015452  | 120 | 3 |
| 61356   | Control  | Male   | 8 | 1258400   | 1413906   | 155507 | rs6558446  | rs1468415  | 41  | 1 |
| 20528   | Affected | Male   | 8 | 1776764   | 1965522   | 188759 | rs11136430 | rs4876252  | 104 | 3 |
| 51379   | Affected | Male   | 8 | 1776764   | 1975127   | 198364 | rs11136430 | rs7006192  | 105 | 3 |
| 51379   | Affected | Male   | 8 | 2022084   | 2133623   | 111540 | rs10102743 | rs317223   | 95  | 3 |
| 20528   | Affected | Male   | 8 | 2022084   | 2133623   | 111540 | rs10102743 | rs317223   | 95  | 3 |
| 31120   | Affected | Male   | 8 | 4297110   | 4433352   | 136243 | rs13278525 | rs2617078  | 88  | 1 |
| 52030   | Control  | Female | 8 | 6116236   | 6279881   | 163646 | rs4841788  | rs6559162  | 64  | 3 |
| 1780    | Affected | Female | 8 | 6116236   | 6283958   | 167723 | rs4841788  | rs2442513  | 65  | 3 |
| 06D6215 | Control  | Male   | 8 | 6116236   | 6283958   | 167723 | rs4841788  | rs2442513  | 65  | 3 |
| 61257   | Control  | Male   | 8 | 6116236   | 6283958   | 167723 | rs4841788  | rs2442513  | 65  | 3 |
| con023  | Control  | Female | 8 | 6136538   | 6324795   | 188258 | rs11137000 | rs17540702 | 76  | 1 |
| 52338   | Affected | Male   | 8 | 8135489   | 8265440   | 129952 | rs2955587  | rs2976972  | 39  | 1 |
| 980131  | Control  | Male   | 8 | 8135489   | 8285468   | 149980 | rs2955587  | rs6601694  | 48  | 1 |
| 52546   | Affected | Male   | 8 | 8135489   | 8285468   | 149980 | rs2955587  | rs6601694  | 48  | 1 |
| 41616   | Affected | Male   | 8 | 14023660  | 14164733  | 141074 | rs17118702 | rs12541432 | 46  | 3 |
| 1223    | Affected | Female | 8 | 18871240  | 19354225  | 482986 | rs17127550 | rs12677088 | 186 | 1 |
| 61004   | Affected | Male   | 8 | 20107092  | 20598973  | 491882 | rs10088108 | rs2597389  | 154 | 3 |
| 61107   | Affected | Male   | 8 | 53518462  | 53690757  | 172296 | rs6990326  | rs4637853  | 45  | 3 |
| 50851   | Affected | Male   | 8 | 54655376  | 54864364  | 208989 | rs1551910  | rs4737753  | 30  | 1 |
| 52192   | Control  | Male   | 8 | 56874267  | 57026041  | 151775 | rs10109493 | rs16922470 | 33  | 3 |
| 70210   | Control  | Male   | 8 | 56885245  | 57036571  | 151327 | rs16922271 | rs2719267  | 37  | 3 |
| 51127   | Affected | Male   | 8 | 56920362  | 57038773  | 118412 | rs12155521 | rs907424   | 37  | 3 |

|         |          |        |   |           |           |        |            |            |     |   |
|---------|----------|--------|---|-----------|-----------|--------|------------|------------|-----|---|
| 30844   | Affected | Male   | 8 | 57496635  | 57623780  | 127146 | rs17760660 | rs2610027  | 28  | 3 |
| 970786  | Control  | Male   | 8 | 73251347  | 73681616  | 430270 | rs7017623  | rs7009604  | 103 | 3 |
| 51358   | Control  | Male   | 8 | 82452393  | 82575548  | 123156 | rs1450790  | rs1304403  | 23  | 1 |
| 62749   | Control  | Female | 8 | 82582067  | 82693196  | 111130 | rs1485999  | rs2955026  | 26  | 3 |
| 70492   | Affected | Female | 8 | 87256166  | 87403084  | 146919 | rs6470428  | rs7017719  | 25  | 3 |
| 30724   | Control  | Male   | 8 | 87270243  | 87403084  | 132842 | rs7815102  | rs7017719  | 23  | 3 |
| 06D6761 | Control  | Female | 8 | 87902827  | 88144314  | 241488 | rs10808349 | rs2974278  | 55  | 3 |
| 30889   | Control  | Female | 8 | 89120413  | 89247103  | 126691 | rs2664370  | rs2681300  | 29  | 3 |
| 20354   | Affected | Male   | 8 | 95193232  | 95385432  | 192201 | rs4421324  | rs2515137  | 60  | 3 |
| 51619   | Control  | Male   | 8 | 105380250 | 105551651 | 171402 | rs2511628  | rs3750187  | 64  | 3 |
| 61278   | Control  | Female | 8 | 109374453 | 109484302 | 109850 | rs6469170  | rs2023106  | 14  | 1 |
| 70597   | Affected | Male   | 8 | 120787622 | 121005702 | 218081 | rs6989251  | rs6469877  | 36  | 3 |
| 70590   | Affected | Male   | 8 | 134656368 | 134935134 | 278767 | rs1554324  | rs7845379  | 121 | 3 |
| 61938   | Control  | Male   | 8 | 135585139 | 135726935 | 141797 | rs894357   | rs17699546 | 66  | 1 |
| con013  | Control  | Female | 8 | 145064091 | 145223898 | 159808 | rs6558406  | rs2070688  | 16  | 3 |
| 10923   | Affected | Male   | 8 | 95744548  | 95798679  | 54132  | rs1895874  | rs9643347  | 15  | 3 |
| 06D6637 | Control  | Female | 8 | 82939617  | 83001525  | 61909  | rs1451994  | rs11779650 | 13  | 3 |
| 11082   | Affected | Female | 8 | 17602799  | 17665222  | 62424  | rs374386   | rs451322   | 30  | 1 |
| 11291   | Affected | Male   | 8 | 17602799  | 17665222  | 62424  | rs374386   | rs451322   | 30  | 1 |
| 70271   | Affected | Male   | 8 | 87256166  | 87319087  | 62922  | rs6470428  | rs4406372  | 18  | 3 |
| 11303   | Affected | Male   | 8 | 15917140  | 15980161  | 63022  | rs2898430  | rs10099900 | 24  | 3 |
| 41877   | Affected | Male   | 8 | 15917140  | 15980161  | 63022  | rs2898430  | rs10099900 | 24  | 3 |
| 61148   | Affected | Male   | 8 | 15917140  | 15980161  | 63022  | rs2898430  | rs10099900 | 24  | 3 |
| 61107   | Affected | Male   | 8 | 53986757  | 54054751  | 67995  | rs10504150 | rs2555186  | 19  | 3 |
| 20602   | Affected | Male   | 8 | 4600608   | 4671975   | 71368  | rs4875115  | rs1379323  | 118 | 1 |
| 1827    | Affected | Male   | 8 | 15994142  | 16065839  | 71698  | rs13280294 | rs351572   | 19  | 1 |
| 10540   | Affected | Male   | 8 | 15994142  | 16065839  | 71698  | rs13280294 | rs351572   | 19  | 1 |
| 20400   | Affected | Male   | 8 | 15994142  | 16065839  | 71698  | rs13280294 | rs351572   | 19  | 1 |
| 52040   | Affected | Male   | 8 | 15994142  | 16065839  | 71698  | rs13280294 | rs351572   | 19  | 1 |
| 60887   | Affected | Female | 8 | 15994142  | 16065839  | 71698  | rs13280294 | rs351572   | 19  | 1 |
| 61025   | Affected | Male   | 8 | 15994142  | 16065839  | 71698  | rs13280294 | rs351572   | 19  | 1 |
| 61576   | Affected | Female | 8 | 15994142  | 16065839  | 71698  | rs13280294 | rs351572   | 19  | 1 |

|        |          |        |   |           |           |        |            |            |     |   |
|--------|----------|--------|---|-----------|-----------|--------|------------|------------|-----|---|
| 71380  | Affected | Male   | 8 | 15994142  | 16065839  | 71698  | rs13280294 | rs351572   | 19  | 1 |
| 960455 | Affected | Female | 8 | 15994142  | 16065839  | 71698  | rs13280294 | rs351572   | 19  | 1 |
| 60625  | Affected | Female | 8 | 15994142  | 16065839  | 71698  | rs13280294 | rs351572   | 19  | 0 |
| 51961  | Control  | Female | 8 | 15994142  | 16065839  | 71698  | rs13280294 | rs351572   | 19  | 1 |
| 62547  | Control  | Female | 8 | 15994142  | 16065839  | 71698  | rs13280294 | rs351572   | 19  | 1 |
| 62825  | Control  | Female | 8 | 15994142  | 16065839  | 71698  | rs13280294 | rs351572   | 19  | 1 |
| 71101  | Control  | Male   | 8 | 15994142  | 16065839  | 71698  | rs13280294 | rs351572   | 19  | 1 |
| 73333  | Control  | Female | 8 | 15994142  | 16065839  | 71698  | rs13280294 | rs351572   | 19  | 1 |
| con094 | Control  | Female | 8 | 384980    | 458609    | 73630  | rs17738097 | rs2121885  | 54  | 3 |
| 42018  | Affected | Male   | 8 | 56963551  | 57038773  | 75223  | rs333616   | rs907424   | 27  | 3 |
| con075 | Control  | Male   | 8 | 15994142  | 16073863  | 79722  | rs13280294 | rs13251251 | 21  | 1 |
| 60518  | Control  | Male   | 8 | 121556228 | 121640447 | 84220  | rs12386936 | rs4297067  | 13  | 3 |
| con023 | Control  | Female | 8 | 109374453 | 109466087 | 91635  | rs6469170  | rs10108399 | 10  | 1 |
| 1477   | Affected | Male   | 8 | 56920362  | 57013973  | 93612  | rs12155521 | rs1126327  | 27  | 3 |
| 41877  | Affected | Male   | 8 | 27365256  | 27460271  | 95016  | rs1106359  | rs2565050  | 38  | 3 |
| 60400  | Affected | Male   | 8 | 3664116   | 3760537   | 96422  | rs9693433  | rs2688324  | 67  | 1 |
| 70798  | Control  | Male   | 9 | 194201    | 388673    | 194473 | rs10964134 | rs12346176 | 124 | 3 |
| 61151  | Control  | Male   | 9 | 194201    | 439798    | 245598 | rs10964134 | rs10491684 | 149 | 3 |
| 1227   | Affected | Female | 9 | 194201    | 439798    | 245598 | rs10964134 | rs10491684 | 149 | 3 |
| 61159  | Affected | Male   | 9 | 205269    | 388673    | 183405 | rs636922   | rs12346176 | 116 | 3 |
| 71400  | Affected | Male   | 9 | 260321    | 490979    | 230659 | rs17720310 | rs10118798 | 122 | 3 |
| 759    | Affected | Male   | 9 | 396117    | 794436    | 398320 | rs1475508  | rs4742419  | 214 | 3 |
| 970778 | Control  | Female | 9 | 411860    | 794436    | 382577 | rs2297080  | rs4742419  | 208 | 3 |
| 51335  | Control  | Female | 9 | 5088223   | 5208524   | 120302 | rs3780373  | rs7853049  | 17  | 3 |
| 30889  | Control  | Female | 9 | 6534734   | 6849189   | 314456 | rs3902970  | rs10975859 | 79  | 3 |
| 11375  | Affected | Male   | 9 | 6557841   | 7007391   | 449551 | rs7870809  | rs7853037  | 134 | 3 |
| 61576  | Affected | Female | 9 | 6685397   | 6902767   | 217371 | rs1094038  | rs10815480 | 55  | 3 |
| 50334  | Affected | Male   | 9 | 9719134   | 9822245   | 103112 | rs10816169 | rs2761763  | 53  | 1 |
| 70028  | Affected | Male   | 9 | 15987006  | 16108758  | 121753 | rs2987036  | rs7873155  | 50  | 1 |
| 51326  | Affected | Female | 9 | 16987947  | 17102482  | 114536 | rs442438   | rs263622   | 29  | 1 |
| 52168  | Affected | Male   | 9 | 19074444  | 19199546  | 125103 | rs10963949 | rs433305   | 33  | 1 |
| 970910 | Control  | Female | 9 | 19271099  | 19484098  | 213000 | rs10757048 | rs10964182 | 45  | 3 |

|        |          |        |   |           |           |        |            |            |    |   |
|--------|----------|--------|---|-----------|-----------|--------|------------|------------|----|---|
| 20350  | Affected | Male   | 9 | 19284073  | 19523872  | 239800 | rs4468024  | rs2383100  | 54 | 3 |
| 20644  | Affected | Male   | 9 | 20690838  | 20887266  | 196429 | rs10964665 | rs11531714 | 64 | 1 |
| 61496  | Control  | Female | 9 | 21438448  | 21556730  | 118283 | rs7864960  | rs7865428  | 37 | 3 |
| 60105  | Affected | Male   | 9 | 28188623  | 28332179  | 143557 | rs991849   | rs1331885  | 61 | 1 |
| con023 | Control  | Female | 9 | 28188623  | 28332179  | 143557 | rs991849   | rs1331885  | 61 | 1 |
| 2049   | Affected | Male   | 9 | 28188623  | 28332179  | 143557 | rs991849   | rs1331885  | 61 | 1 |
| 1827   | Affected | Male   | 9 | 28188623  | 28332179  | 143557 | rs991849   | rs1331885  | 61 | 1 |
| 70026  | Affected | Female | 9 | 28572398  | 28707480  | 135083 | rs1996774  | rs6476091  | 33 | 1 |
| 20347  | Affected | Male   | 9 | 28585171  | 28751593  | 166423 | rs1521730  | rs321728   | 40 | 1 |
| 30857  | Affected | Male   | 9 | 28634923  | 28751593  | 116671 | rs10511830 | rs321728   | 28 | 1 |
| 10973  | Affected | Male   | 9 | 33318812  | 33608936  | 290125 | rs2292243  | rs855514   | 54 | 3 |
| 61291  | Affected | Male   | 9 | 70764577  | 71032843  | 268267 | rs10114872 | rs2309428  | 60 | 3 |
| 11373  | Affected | Male   | 9 | 70764577  | 71032843  | 268267 | rs10114872 | rs2309428  | 60 | 3 |
| 52571  | Control  | Female | 9 | 88793103  | 89017482  | 224380 | rs10120212 | rs432005   | 50 | 1 |
| 72609  | Affected | Male   | 9 | 89760155  | 90145367  | 385213 | rs472627   | rs12348836 | 93 | 3 |
| 1793   | Affected | Male   | 9 | 102342854 | 102492148 | 149295 | rs10465148 | rs16919333 | 41 | 3 |
| 62463  | Control  | Female | 9 | 110465741 | 110653174 | 187434 | rs4403487  | rs10448264 | 66 | 1 |
| 51326  | Affected | Female | 9 | 118051212 | 118410500 | 359289 | rs10983088 | rs2416564  | 89 | 3 |
| 70210  | Control  | Male   | 9 | 134588424 | 134728634 | 140211 | rs306530   | rs2526004  | 40 | 3 |
| 20346  | Affected | Female | 9 | 136718799 | 136883130 | 164332 | rs10776897 | rs3128570  | 72 | 3 |
| 20081  | Affected | Male   | 9 | 138155232 | 138264677 | 109446 | rs1747839  | rs7032944  | 21 | 3 |
| con013 | Control  | Female | 9 | 138606913 | 138727787 | 120875 | rs4880055  | rs11793385 | 26 | 3 |
| 62751  | Affected | Male   | 9 | 138619531 | 138907274 | 287744 | rs7045617  | rs2811761  | 48 | 3 |
| 52323  | Control  | Female | 9 | 131088774 | 131139212 | 50439  | rs7029664  | rs2026995  | 23 | 3 |
| 70402  | Control  | Male   | 9 | 28388225  | 28445146  | 56922  | rs10968560 | rs16913128 | 33 | 1 |
| 61477  | Affected | Male   | 9 | 138374138 | 138437690 | 63553  | rs11145922 | rs1130635  | 13 | 3 |
| 61308  | Affected | Male   | 9 | 15287028  | 15352057  | 65030  | rs3905248  | rs1942476  | 26 | 1 |
| 11323  | Affected | Male   | 9 | 19458614  | 19523872  | 65259  | rs7021669  | rs2383100  | 22 | 3 |
| 61670  | Affected | Male   | 9 | 1905483   | 1972607   | 67125  | rs4551422  | rs7027936  | 18 | 1 |
| 1737   | Affected | Male   | 9 | 15865162  | 15933931  | 68770  | rs2794632  | rs10810488 | 21 | 1 |
| 60360  | Affected | Male   | 9 | 10423023  | 10491953  | 68931  | rs669484   | rs2181156  | 20 | 1 |
| 62547  | Control  | Female | 9 | 194201    | 263160    | 68960  | rs10964134 | rs540909   | 54 | 3 |

|         |          |        |    |           |           |         |            |            |     |   |
|---------|----------|--------|----|-----------|-----------|---------|------------|------------|-----|---|
| 51563   | Affected | Male   | 9  | 132404905 | 132476485 | 71581   | rs944605   | rs12351309 | 17  | 3 |
| 61070   | Affected | Male   | 9  | 132404905 | 132476485 | 71581   | rs944605   | rs12351309 | 17  | 3 |
| 980001  | Control  | Male   | 9  | 132404905 | 132476485 | 71581   | rs944605   | rs12351309 | 17  | 3 |
| 62612   | Control  | Male   | 9  | 28519410  | 28591613  | 72204   | rs12551829 | rs16913380 | 25  | 1 |
| 1318    | Affected | Female | 9  | 15287028  | 15360575  | 73548   | rs3905248  | rs1105191  | 27  | 1 |
| 970858  | Control  | Female | 9  | 77568615  | 77645475  | 76861   | rs7848931  | rs11144641 | 18  | 3 |
| 970806  | Control  | Female | 9  | 9782326   | 9859714   | 77389   | rs12684906 | rs10978049 | 39  | 1 |
| 51208   | Affected | Male   | 9  | 194201    | 279061    | 84861   | rs10964134 | rs6476030  | 62  | 3 |
| 52506   | Control  | Female | 9  | 32245125  | 32331611  | 86487   | rs10970869 | rs10970932 | 26  | 1 |
| 51223   | Control  | Male   | 9  | 17524866  | 17623232  | 98367   | rs2593375  | rs2208496  | 39  | 3 |
| 61060   | Control  | Female | 10 | 3862876   | 4519263   | 656388  | rs10904103 | rs1079110  | 184 | 3 |
| 61642   | Affected | Male   | 10 | 36323016  | 37702921  | 1379906 | rs10508823 | rs1938421  | 228 | 3 |
| 71214   | Control  | Female | 10 | 47013328  | 51492912  | 4479585 | rs11259779 | rs3964873  | 608 | 1 |
| 62720   | Control  | Female | 10 | 1125248   | 1270409   | 145162  | rs4880474  | rs4880802  | 51  | 3 |
| 62443   | Control  | Female | 10 | 5120610   | 5383936   | 263327  | rs1937905  | rs10752011 | 83  | 1 |
| 61060   | Control  | Female | 10 | 5124416   | 5329074   | 204659  | rs11252934 | rs1344354  | 58  | 3 |
| 51875   | Affected | Male   | 10 | 27609527  | 27915012  | 305486  | rs2483499  | rs1494209  | 68  | 3 |
| 71334   | Affected | Male   | 10 | 27652366  | 27816417  | 164052  | rs237605   | rs2505331  | 42  | 1 |
| 51875   | Affected | Male   | 10 | 28300157  | 28502418  | 202262  | rs4405206  | rs4309056  | 58  | 3 |
| 51574   | Control  | Female | 10 | 44530696  | 44679489  | 148794  | rs7097094  | rs6593445  | 25  | 3 |
| con072  | Control  | Male   | 10 | 44530696  | 44679489  | 148794  | rs7097094  | rs6593445  | 25  | 3 |
| 70433   | Control  | Female | 10 | 44530696  | 44679489  | 148794  | rs7097094  | rs6593445  | 25  | 3 |
| 60974   | Control  | Female | 10 | 44530696  | 44679489  | 148794  | rs7097094  | rs6593445  | 25  | 3 |
| 60946   | Control  | Male   | 10 | 44530696  | 44679489  | 148794  | rs7097094  | rs6593445  | 25  | 3 |
| 805     | Affected | Male   | 10 | 44530696  | 44679489  | 148794  | rs7097094  | rs6593445  | 25  | 3 |
| 11404   | Affected | Female | 10 | 44530696  | 44679489  | 148794  | rs7097094  | rs6593445  | 25  | 3 |
| 70969   | Control  | Female | 10 | 44550157  | 44679489  | 129333  | rs960442   | rs6593445  | 23  | 3 |
| 41616   | Affected | Male   | 10 | 44550157  | 44679489  | 129333  | rs960442   | rs6593445  | 23  | 3 |
| 970488  | Control  | Female | 10 | 44568949  | 44679489  | 110541  | rs1749328  | rs6593445  | 22  | 3 |
| 61687   | Affected | Male   | 10 | 44568949  | 44679489  | 110541  | rs1749328  | rs6593445  | 22  | 3 |
| 06D6268 | Control  | Female | 10 | 44568949  | 44679489  | 110541  | rs1749328  | rs6593445  | 22  | 3 |
| 62332   | Control  | Female | 10 | 44568949  | 44679489  | 110541  | rs1749328  | rs6593445  | 22  | 3 |



|         |          |        |    |          |          |        |            |           |    |   |
|---------|----------|--------|----|----------|----------|--------|------------|-----------|----|---|
| 06D6373 | Control  | Female | 10 | 44568949 | 44679489 | 110541 | rs1749328  | rs6593445 | 22 | 3 |
| 60356   | Affected | Female | 10 | 44568949 | 44679489 | 110541 | rs1749328  | rs6593445 | 22 | 3 |
| 960252  | Affected | Female | 10 | 44568949 | 44679489 | 110541 | rs1749328  | rs6593445 | 22 | 3 |
| 62663   | Control  | Female | 10 | 44568949 | 44679489 | 110541 | rs1749328  | rs6593445 | 22 | 3 |
| 06D6475 | Control  | Male   | 10 | 44568949 | 44679489 | 110541 | rs1749328  | rs6593445 | 22 | 3 |
| 20347   | Affected | Male   | 10 | 44568949 | 44679489 | 110541 | rs1749328  | rs6593445 | 22 | 3 |
| con029  | Control  | Male   | 10 | 44568949 | 44679489 | 110541 | rs1749328  | rs6593445 | 22 | 3 |
| 50495   | Affected | Male   | 10 | 44568949 | 44679489 | 110541 | rs1749328  | rs6593445 | 22 | 3 |
| 2050    | Affected | Male   | 10 | 44568949 | 44679489 | 110541 | rs1749328  | rs6593445 | 22 | 3 |
| 30921   | Affected | Male   | 10 | 44568949 | 44679489 | 110541 | rs1749328  | rs6593445 | 22 | 3 |
| 60983   | Affected | Male   | 10 | 44568949 | 44679489 | 110541 | rs1749328  | rs6593445 | 22 | 3 |
| 06D6442 | Control  | Female | 10 | 47013328 | 47122505 | 109178 | rs11259779 | rs7071918 | 19 | 1 |
| 20602   | Affected | Male   | 10 | 47013328 | 47122505 | 109178 | rs11259779 | rs7071918 | 19 | 1 |
| 50979   | Affected | Male   | 10 | 47013328 | 47122505 | 109178 | rs11259779 | rs7071918 | 19 | 1 |
| 61670   | Affected | Male   | 10 | 47013328 | 47122505 | 109178 | rs11259779 | rs7071918 | 19 | 3 |
| 20403   | Affected | Female | 10 | 47013328 | 47122505 | 109178 | rs11259779 | rs7071918 | 19 | 3 |
| 60821   | Control  | Male   | 10 | 47013328 | 47122505 | 109178 | rs11259779 | rs7071918 | 19 | 3 |
| con001  | Control  | Male   | 10 | 47013328 | 47157807 | 144480 | rs11259779 | rs7076022 | 27 | 3 |
| 40313   | Control  | Male   | 10 | 47013328 | 47157807 | 144480 | rs11259779 | rs7076022 | 27 | 3 |
| 980319  | Affected | Male   | 10 | 47013328 | 47173619 | 160292 | rs11259779 | rs4128664 | 35 | 1 |
| 60207   | Affected | Male   | 10 | 47013328 | 47173619 | 160292 | rs11259779 | rs4128664 | 35 | 1 |
| 61784   | Affected | Male   | 10 | 47013328 | 47173619 | 160292 | rs11259779 | rs4128664 | 35 | 1 |
| 52175   | Control  | Female | 10 | 47013328 | 47173619 | 160292 | rs11259779 | rs4128664 | 35 | 1 |
| 51986   | Control  | Male   | 10 | 47013328 | 47173619 | 160292 | rs11259779 | rs4128664 | 35 | 1 |
| con067  | Control  | Male   | 10 | 47013328 | 47173619 | 160292 | rs11259779 | rs4128664 | 35 | 3 |
| 70402   | Control  | Male   | 10 | 47013328 | 47173619 | 160292 | rs11259779 | rs4128664 | 35 | 3 |
| 06D6440 | Control  | Male   | 10 | 47013328 | 47173619 | 160292 | rs11259779 | rs4128664 | 35 | 3 |
| 51349   | Affected | Female | 10 | 47013328 | 47173619 | 160292 | rs11259779 | rs4128664 | 35 | 3 |
| 981079  | Control  | Female | 10 | 47013328 | 47173619 | 160292 | rs11259779 | rs4128664 | 35 | 3 |
| con095  | Control  | Female | 10 | 47013328 | 47173619 | 160292 | rs11259779 | rs4128664 | 35 | 3 |
| 990265  | Affected | Female | 10 | 47013328 | 47173619 | 160292 | rs11259779 | rs4128664 | 35 | 3 |
| 70510   | Affected | Female | 10 | 47013328 | 47173619 | 160292 | rs11259779 | rs4128664 | 35 | 3 |

|         |          |        |    |          |          |        |            |           |    |   |
|---------|----------|--------|----|----------|----------|--------|------------|-----------|----|---|
| 52377   | Control  | Male   | 10 | 47013328 | 47173619 | 160292 | rs11259779 | rs4128664 | 35 | 3 |
| 970581  | Affected | Female | 10 | 47013328 | 47173619 | 160292 | rs11259779 | rs4128664 | 35 | 3 |
| 51716   | Affected | Male   | 10 | 47013328 | 47173619 | 160292 | rs11259779 | rs4128664 | 35 | 3 |
| 71266   | Control  | Female | 10 | 47013328 | 47173619 | 160292 | rs11259779 | rs4128664 | 35 | 3 |
| 61911   | Control  | Male   | 10 | 47013328 | 47173619 | 160292 | rs11259779 | rs4128664 | 35 | 3 |
| 52419   | Control  | Male   | 10 | 47013328 | 47173619 | 160292 | rs11259779 | rs4128664 | 35 | 3 |
| 61619   | Control  | Male   | 10 | 47013328 | 47173619 | 160292 | rs11259779 | rs4128664 | 35 | 3 |
| 61070   | Affected | Male   | 10 | 47013328 | 47173619 | 160292 | rs11259779 | rs4128664 | 35 | 3 |
| 51619   | Control  | Male   | 10 | 47013328 | 47173619 | 160292 | rs11259779 | rs4128664 | 35 | 3 |
| 61544   | Control  | Male   | 10 | 47013328 | 47173619 | 160292 | rs11259779 | rs4128664 | 35 | 3 |
| con020  | Control  | Male   | 10 | 47013328 | 47173619 | 160292 | rs11259779 | rs4128664 | 35 | 3 |
| 11357   | Affected | Female | 10 | 47013328 | 47173619 | 160292 | rs11259779 | rs4128664 | 35 | 3 |
| 980177  | Affected | Male   | 10 | 47013328 | 47173619 | 160292 | rs11259779 | rs4128664 | 35 | 3 |
| 71417   | Affected | Male   | 10 | 47013328 | 47173619 | 160292 | rs11259779 | rs4128664 | 35 | 3 |
| 60468   | Affected | Male   | 10 | 47013328 | 47173619 | 160292 | rs11259779 | rs4128664 | 35 | 3 |
| 06D6498 | Control  | Female | 10 | 47013328 | 47173619 | 160292 | rs11259779 | rs4128664 | 35 | 3 |
| 61241   | Control  | Male   | 10 | 47013328 | 47173619 | 160292 | rs11259779 | rs4128664 | 35 | 3 |
| con042  | Control  | Male   | 10 | 47013328 | 47173619 | 160292 | rs11259779 | rs4128664 | 35 | 3 |
| 50329   | Affected | Male   | 10 | 47013328 | 47173619 | 160292 | rs11259779 | rs4128664 | 35 | 3 |
| 06D6529 | Control  | Male   | 10 | 47013328 | 47173619 | 160292 | rs11259779 | rs4128664 | 35 | 3 |
| 970557  | Affected | Male   | 10 | 47013328 | 47173619 | 160292 | rs11259779 | rs4128664 | 35 | 3 |
| 11359   | Affected | Male   | 10 | 47013328 | 47173619 | 160292 | rs11259779 | rs4128664 | 35 | 3 |
| 61568   | Control  | Female | 10 | 47013328 | 47173619 | 160292 | rs11259779 | rs4128664 | 35 | 3 |
| con006  | Control  | Female | 10 | 47013328 | 47173619 | 160292 | rs11259779 | rs4128664 | 35 | 3 |
| 62522   | Control  | Male   | 10 | 47013328 | 47173619 | 160292 | rs11259779 | rs4128664 | 35 | 3 |
| 970916  | Control  | Female | 10 | 47013328 | 47173619 | 160292 | rs11259779 | rs4128664 | 35 | 3 |
| 1247    | Affected | Male   | 10 | 47013328 | 47173619 | 160292 | rs11259779 | rs4128664 | 35 | 3 |
| 06D6467 | Control  | Female | 10 | 47013328 | 47173619 | 160292 | rs11259779 | rs4128664 | 35 | 3 |
| 70208   | Affected | Male   | 10 | 47013328 | 47173619 | 160292 | rs11259779 | rs4128664 | 35 | 3 |
| 60616   | Affected | Male   | 10 | 47013328 | 47173619 | 160292 | rs11259779 | rs4128664 | 35 | 3 |
| 60334   | Affected | Male   | 10 | 47013328 | 47173619 | 160292 | rs11259779 | rs4128664 | 35 | 3 |
| 50010   | Affected | Male   | 10 | 47013328 | 47173619 | 160292 | rs11259779 | rs4128664 | 35 | 3 |

|         |          |        |    |          |          |        |            |           |    |   |
|---------|----------|--------|----|----------|----------|--------|------------|-----------|----|---|
| 970910  | Control  | Female | 10 | 47013328 | 47173619 | 160292 | rs11259779 | rs4128664 | 35 | 3 |
| 51335   | Control  | Female | 10 | 47013328 | 47173619 | 160292 | rs11259779 | rs4128664 | 35 | 3 |
| con069  | Control  | Male   | 10 | 47013328 | 47173619 | 160292 | rs11259779 | rs4128664 | 35 | 3 |
| 11327   | Affected | Female | 10 | 47013328 | 47173619 | 160292 | rs11259779 | rs4128664 | 35 | 3 |
| 62003   | Control  | Female | 10 | 47013328 | 47173619 | 160292 | rs11259779 | rs4128664 | 35 | 3 |
| 60543   | Control  | Male   | 10 | 47013328 | 47173619 | 160292 | rs11259779 | rs4128664 | 35 | 3 |
| 70111   | Affected | Male   | 10 | 47013328 | 47173619 | 160292 | rs11259779 | rs4128664 | 35 | 3 |
| 61107   | Affected | Male   | 10 | 47013328 | 47173619 | 160292 | rs11259779 | rs4128664 | 35 | 3 |
| 30928   | Control  | Male   | 10 | 47013328 | 47173619 | 160292 | rs11259779 | rs4128664 | 35 | 3 |
| 71101   | Control  | Male   | 10 | 47013328 | 47173619 | 160292 | rs11259779 | rs4128664 | 35 | 3 |
| 71133   | Affected | Female | 10 | 47013328 | 47173619 | 160292 | rs11259779 | rs4128664 | 35 | 3 |
| 51656   | Control  | Female | 10 | 47013328 | 47173619 | 160292 | rs11259779 | rs4128664 | 35 | 3 |
| 30815   | Control  | Male   | 10 | 47013328 | 47173619 | 160292 | rs11259779 | rs4128664 | 35 | 3 |
| 52180   | Affected | Male   | 10 | 47013328 | 47173619 | 160292 | rs11259779 | rs4128664 | 35 | 3 |
| 62888   | Control  | Male   | 10 | 47013328 | 47173619 | 160292 | rs11259779 | rs4128664 | 35 | 3 |
| 70069   | Affected | Male   | 10 | 47013328 | 47173619 | 160292 | rs11259779 | rs4128664 | 35 | 3 |
| 647     | Affected | Male   | 10 | 47013328 | 47173619 | 160292 | rs11259779 | rs4128664 | 35 | 3 |
| 60530   | Control  | Female | 10 | 47013328 | 47173619 | 160292 | rs11259779 | rs4128664 | 35 | 3 |
| 20226   | Affected | Male   | 10 | 47013328 | 47173619 | 160292 | rs11259779 | rs4128664 | 35 | 3 |
| 71400   | Affected | Male   | 10 | 47013328 | 47173619 | 160292 | rs11259779 | rs4128664 | 35 | 3 |
| 10594   | Affected | Female | 10 | 47013328 | 47173619 | 160292 | rs11259779 | rs4128664 | 35 | 3 |
| 20353   | Affected | Female | 10 | 47013328 | 47173619 | 160292 | rs11259779 | rs4128664 | 35 | 3 |
| 10540   | Affected | Male   | 10 | 47013328 | 47173619 | 160292 | rs11259779 | rs4128664 | 35 | 3 |
| 60809   | Affected | Male   | 10 | 47013328 | 47173619 | 160292 | rs11259779 | rs4128664 | 35 | 3 |
| 06D6612 | Control  | Female | 10 | 47013328 | 47173619 | 160292 | rs11259779 | rs4128664 | 35 | 3 |
| 70860   | Affected | Male   | 10 | 47013328 | 47173619 | 160292 | rs11259779 | rs4128664 | 35 | 3 |
| 51633   | Affected | Male   | 10 | 47013328 | 47173619 | 160292 | rs11259779 | rs4128664 | 35 | 3 |
| 40239   | Affected | Male   | 10 | 47013328 | 47173619 | 160292 | rs11259779 | rs4128664 | 35 | 3 |
| 61464   | Control  | Female | 10 | 47013328 | 47173619 | 160292 | rs11259779 | rs4128664 | 35 | 3 |
| 70149   | Affected | Female | 10 | 47013328 | 47173619 | 160292 | rs11259779 | rs4128664 | 35 | 3 |
| 71238   | Control  | Female | 10 | 47013328 | 47173619 | 160292 | rs11259779 | rs4128664 | 35 | 3 |
| 62547   | Control  | Female | 10 | 47013328 | 47173619 | 160292 | rs11259779 | rs4128664 | 35 | 3 |

|         |          |        |    |          |          |        |            |           |    |   |
|---------|----------|--------|----|----------|----------|--------|------------|-----------|----|---|
| 62619   | Control  | Male   | 10 | 47013328 | 47173619 | 160292 | rs11259779 | rs4128664 | 35 | 3 |
| 30889   | Control  | Female | 10 | 47013328 | 47173619 | 160292 | rs11259779 | rs4128664 | 35 | 3 |
| 20230   | Affected | Male   | 10 | 47013328 | 47173619 | 160292 | rs11259779 | rs4128664 | 35 | 3 |
| 06D6473 | Control  | Male   | 10 | 47013328 | 47173619 | 160292 | rs11259779 | rs4128664 | 35 | 3 |
| con007  | Control  | Female | 10 | 47013328 | 47173619 | 160292 | rs11259779 | rs4128664 | 35 | 3 |
| 06D6367 | Control  | Male   | 10 | 47013328 | 47173619 | 160292 | rs11259779 | rs4128664 | 35 | 3 |
| 52477   | Affected | Male   | 10 | 47013328 | 47173619 | 160292 | rs11259779 | rs4128664 | 35 | 3 |
| 11203   | Affected | Male   | 10 | 47013328 | 47173619 | 160292 | rs11259779 | rs4128664 | 35 | 3 |
| 62019   | Control  | Female | 10 | 47013328 | 47173619 | 160292 | rs11259779 | rs4128664 | 35 | 3 |
| 60205   | Affected | Male   | 10 | 47013328 | 47173619 | 160292 | rs11259779 | rs4128664 | 35 | 3 |
| 71064   | Affected | Male   | 10 | 47013328 | 47173619 | 160292 | rs11259779 | rs4128664 | 35 | 3 |
| 70504   | Control  | Female | 10 | 47013328 | 47173619 | 160292 | rs11259779 | rs4128664 | 35 | 3 |
| 40006   | Affected | Male   | 10 | 47013328 | 47173619 | 160292 | rs11259779 | rs4128664 | 35 | 3 |
| 50638   | Affected | Male   | 10 | 47013328 | 47173619 | 160292 | rs11259779 | rs4128664 | 35 | 3 |
| 833     | Affected | Male   | 10 | 47013328 | 47173619 | 160292 | rs11259779 | rs4128664 | 35 | 3 |
| 70269   | Affected | Female | 10 | 47013328 | 47173619 | 160292 | rs11259779 | rs4128664 | 35 | 3 |
| 51857   | Affected | Male   | 10 | 47013328 | 47173619 | 160292 | rs11259779 | rs4128664 | 35 | 3 |
| 71326   | Control  | Male   | 10 | 47013328 | 47173619 | 160292 | rs11259779 | rs4128664 | 35 | 3 |
| 50079   | Affected | Male   | 10 | 47013328 | 47173619 | 160292 | rs11259779 | rs4128664 | 35 | 3 |
| 50080   | Affected | Female | 10 | 47013328 | 47173619 | 160292 | rs11259779 | rs4128664 | 35 | 3 |
| 11139   | Affected | Male   | 10 | 47013328 | 47173619 | 160292 | rs11259779 | rs4128664 | 35 | 3 |
| 50214   | Affected | Male   | 10 | 47013328 | 47173619 | 160292 | rs11259779 | rs4128664 | 35 | 3 |
| 1827    | Affected | Male   | 10 | 47013328 | 47173619 | 160292 | rs11259779 | rs4128664 | 35 | 3 |
| 20633   | Affected | Male   | 10 | 47013328 | 47173619 | 160292 | rs11259779 | rs4128664 | 35 | 3 |
| 11289   | Affected | Female | 10 | 47013328 | 47173619 | 160292 | rs11259779 | rs4128664 | 35 | 3 |
| 52398   | Control  | Male   | 10 | 47013328 | 47173619 | 160292 | rs11259779 | rs4128664 | 35 | 3 |
| 1227    | Affected | Female | 10 | 47013328 | 47173619 | 160292 | rs11259779 | rs4128664 | 35 | 3 |
| 20475   | Affected | Male   | 10 | 47013328 | 47173619 | 160292 | rs11259779 | rs4128664 | 35 | 3 |
| 52327   | Affected | Female | 10 | 47013328 | 47173619 | 160292 | rs11259779 | rs4128664 | 35 | 3 |
| 60204   | Affected | Male   | 10 | 47013328 | 47173619 | 160292 | rs11259779 | rs4128664 | 35 | 3 |
| 60972   | Affected | Male   | 10 | 47013328 | 47173619 | 160292 | rs11259779 | rs4128664 | 35 | 3 |
| 60840   | Affected | Male   | 10 | 47013328 | 47173619 | 160292 | rs11259779 | rs4128664 | 35 | 3 |

|         |          |        |    |           |           |        |            |            |    |   |
|---------|----------|--------|----|-----------|-----------|--------|------------|------------|----|---|
| 51760   | Affected | Male   | 10 | 47013328  | 47173619  | 160292 | rs11259779 | rs4128664  | 35 | 3 |
| 20620   | Affected | Male   | 10 | 47013328  | 47173619  | 160292 | rs11259779 | rs4128664  | 35 | 3 |
| 60625   | Affected | Female | 10 | 47058066  | 47173619  | 115554 | rs17835817 | rs4128664  | 34 | 3 |
| 61641   | Affected | Female | 10 | 47058066  | 47173619  | 115554 | rs17835817 | rs4128664  | 34 | 3 |
| 11156   | Affected | Male   | 10 | 47058066  | 47173619  | 115554 | rs17835817 | rs4128664  | 34 | 3 |
| 70856   | Affected | Female | 10 | 47058066  | 47173619  | 115554 | rs17835817 | rs4128664  | 34 | 3 |
| 61291   | Affected | Male   | 10 | 47058066  | 47173619  | 115554 | rs17835817 | rs4128664  | 34 | 3 |
| 61057   | Control  | Male   | 10 | 47058066  | 47173619  | 115554 | rs17835817 | rs4128664  | 34 | 3 |
| 70746   | Affected | Male   | 10 | 47058066  | 47173619  | 115554 | rs17835817 | rs4128664  | 34 | 3 |
| 61389   | Affected | Male   | 10 | 47058066  | 47173619  | 115554 | rs17835817 | rs4128664  | 34 | 3 |
| 20479   | Affected | Female | 10 | 47058066  | 47173619  | 115554 | rs17835817 | rs4128664  | 34 | 3 |
| 06D6841 | Control  | Female | 10 | 57834323  | 57977755  | 143433 | rs10825792 | rs10509049 | 18 | 1 |
| 62745   | Control  | Female | 10 | 64020539  | 64140681  | 120143 | rs2176289  | rs224136   | 31 | 1 |
| 62251   | Control  | Male   | 10 | 67724488  | 67878895  | 154408 | rs10762051 | rs10997133 | 50 | 1 |
| 61158   | Control  | Female | 10 | 67878895  | 68113302  | 234408 | rs10997133 | rs713298   | 76 | 1 |
| 805     | Affected | Male   | 10 | 67962374  | 68180377  | 218004 | rs2631217  | rs12268982 | 70 | 1 |
| 61011   | Control  | Female | 10 | 68411841  | 68592248  | 180408 | rs942788   | rs10822992 | 58 | 3 |
| 51961   | Control  | Female | 10 | 68411841  | 68592248  | 180408 | rs942788   | rs10822992 | 58 | 3 |
| 60361   | Control  | Male   | 10 | 81567594  | 81962366  | 394773 | rs10885307 | rs3000954  | 67 | 3 |
| 61136   | Affected | Male   | 10 | 82370645  | 82662797  | 292153 | rs7067934  | rs2345201  | 95 | 4 |
| 60032   | Affected | Male   | 10 | 108160793 | 108416196 | 255404 | rs17120734 | rs7095427  | 50 | 3 |
| 31008   | Control  | Female | 10 | 112038085 | 112236342 | 198258 | rs1954281  | rs7911973  | 65 | 3 |
| 70669   | Control  | Female | 10 | 116142344 | 116518284 | 375941 | rs537432   | rs11196905 | 98 | 3 |
| 61205   | Control  | Female | 10 | 116142344 | 116518284 | 375941 | rs537432   | rs11196905 | 98 | 3 |
| 50095   | Affected | Male   | 10 | 135116379 | 135227438 | 111060 | rs2265900  | rs10857762 | 32 | 1 |
| 51723   | Affected | Female | 10 | 135116379 | 135227438 | 111060 | rs2265900  | rs10857762 | 32 | 1 |
| 50278   | Affected | Male   | 10 | 135116379 | 135227438 | 111060 | rs2265900  | rs10857762 | 32 | 3 |
| con018  | Control  | Male   | 10 | 135116379 | 135227438 | 111060 | rs2265900  | rs10857762 | 32 | 3 |
| 62545   | Control  | Male   | 10 | 135116379 | 135227438 | 111060 | rs2265900  | rs10857762 | 32 | 3 |
| con095  | Control  | Female | 10 | 135116379 | 135227438 | 111060 | rs2265900  | rs10857762 | 32 | 3 |
| 11156   | Affected | Male   | 10 | 135116379 | 135227438 | 111060 | rs2265900  | rs10857762 | 32 | 3 |
| 970862  | Control  | Female | 10 | 135116379 | 135227438 | 111060 | rs2265900  | rs10857762 | 32 | 3 |

|         |          |        |    |           |           |        |            |            |    |   |
|---------|----------|--------|----|-----------|-----------|--------|------------|------------|----|---|
| con042  | Control  | Male   | 10 | 135116379 | 135227438 | 111060 | rs2265900  | rs10857762 | 32 | 3 |
| 06D6473 | Control  | Male   | 10 | 135116379 | 135227438 | 111060 | rs2265900  | rs10857762 | 32 | 3 |
| 61793   | Control  | Female | 10 | 135116379 | 135227438 | 111060 | rs2265900  | rs10857762 | 32 | 3 |
| 20353   | Affected | Female | 10 | 135116379 | 135227438 | 111060 | rs2265900  | rs10857762 | 32 | 3 |
| 20687   | Affected | Female | 10 | 135116379 | 135227438 | 111060 | rs2265900  | rs10857762 | 32 | 3 |
| 62567   | Control  | Male   | 10 | 135116379 | 135227438 | 111060 | rs2265900  | rs10857762 | 32 | 3 |
| 60946   | Control  | Male   | 10 | 135116379 | 135227438 | 111060 | rs2265900  | rs10857762 | 32 | 3 |
| 41199   | Affected | Female | 10 | 135116379 | 135227438 | 111060 | rs2265900  | rs10857762 | 32 | 3 |
| 70071   | Affected | Female | 10 | 135116379 | 135227438 | 111060 | rs2265900  | rs10857762 | 32 | 3 |
| 11102   | Affected | Male   | 10 | 135116379 | 135227438 | 111060 | rs2265900  | rs10857762 | 32 | 3 |
| 20611   | Affected | Female | 10 | 135116379 | 135227438 | 111060 | rs2265900  | rs10857762 | 32 | 3 |
| 61703   | Control  | Female | 10 | 135116379 | 135227438 | 111060 | rs2265900  | rs10857762 | 32 | 3 |
| 52501   | Control  | Male   | 10 | 135116379 | 135227438 | 111060 | rs2265900  | rs10857762 | 32 | 3 |
| 60627   | Affected | Female | 10 | 135116379 | 135227438 | 111060 | rs2265900  | rs10857762 | 32 | 3 |
| 30921   | Affected | Male   | 10 | 135116379 | 135227438 | 111060 | rs2265900  | rs10857762 | 32 | 3 |
| 1494    | Affected | Female | 10 | 135116379 | 135227438 | 111060 | rs2265900  | rs10857762 | 32 | 3 |
| 20632   | Affected | Male   | 10 | 135116379 | 135227438 | 111060 | rs2265900  | rs10857762 | 32 | 3 |
| 10806   | Affected | Female | 10 | 135116379 | 135252190 | 135812 | rs2265900  | rs4351775  | 33 | 1 |
| 62349   | Control  | Female | 10 | 135125348 | 135227438 | 102091 | rs2252728  | rs10857762 | 31 | 3 |
| 1318    | Affected | Female | 10 | 135125348 | 135227438 | 102091 | rs2252728  | rs10857762 | 31 | 3 |
| 60972   | Affected | Male   | 10 | 135125348 | 135227438 | 102091 | rs2252728  | rs10857762 | 31 | 3 |
| 60663   | Control  | Female | 10 | 135126627 | 135227438 | 100812 | rs880282   | rs10857762 | 30 | 3 |
| 11116   | Affected | Female | 10 | 53422481  | 53475366  | 52886  | rs11000400 | rs6480687  | 27 | 1 |
| 70219   | Affected | Female | 10 | 135170612 | 135227438 | 56827  | rs9418982  | rs10857762 | 21 | 3 |
| 20355   | Affected | Female | 10 | 133967990 | 134025568 | 57579  | rs2492651  | rs10870295 | 12 | 3 |
| 70651   | Control  | Male   | 10 | 67954023  | 68023745  | 69723  | rs2939914  | rs1911338  | 19 | 1 |
| 970879  | Control  | Female | 10 | 15030375  | 15100889  | 70515  | rs7916726  | rs7916087  | 12 | 3 |
| 11211   | Affected | Male   | 10 | 135156148 | 135227438 | 71291  | rs1536827  | rs10857762 | 22 | 3 |
| 970290  | Affected | Male   | 10 | 135153022 | 135227438 | 74417  | rs1329152  | rs10857762 | 23 | 3 |
| 61060   | Control  | Female | 10 | 135153022 | 135227438 | 74417  | rs1329152  | rs10857762 | 23 | 3 |
| 62505   | Affected | Male   | 10 | 116247513 | 116322760 | 75248  | rs7910989  | rs2483567  | 25 | 1 |
| 970862  | Control  | Female | 10 | 5120610   | 5196096   | 75487  | rs1937905  | rs2398103  | 20 | 1 |

|         |          |        |    |           |           |       |            |            |    |   |
|---------|----------|--------|----|-----------|-----------|-------|------------|------------|----|---|
| 71133   | Affected | Female | 10 | 135125348 | 135202090 | 76743 | rs2252728  | rs2480258  | 24 | 3 |
| 980319  | Affected | Male   | 10 | 51185540  | 51264468  | 78929 | rs2611512  | rs7350420  | 15 | 1 |
| 980503  | Affected | Male   | 10 | 56280721  | 56361311  | 80591 | rs10763151 | rs1733795  | 29 | 0 |
| 30976   | Control  | Female | 10 | 47091948  | 47173619  | 81672 | rs5019325  | rs4128664  | 26 | 3 |
| 62897   | Control  | Female | 10 | 68139243  | 68222395  | 83153 | rs10997325 | rs7078170  | 29 | 1 |
| 1793    | Affected | Male   | 10 | 135116379 | 135202090 | 85712 | rs2265900  | rs2480258  | 25 | 3 |
| 60816   | Affected | Male   | 10 | 135116379 | 135202090 | 85712 | rs2265900  | rs2480258  | 25 | 3 |
| 61291   | Affected | Male   | 10 | 135116379 | 135202090 | 85712 | rs2265900  | rs2480258  | 25 | 3 |
| 61332   | Affected | Male   | 10 | 135116379 | 135202090 | 85712 | rs2265900  | rs2480258  | 25 | 3 |
| 61542   | Affected | Male   | 10 | 135116379 | 135202090 | 85712 | rs2265900  | rs2480258  | 25 | 3 |
| 71145   | Affected | Male   | 10 | 135116379 | 135202090 | 85712 | rs2265900  | rs2480258  | 25 | 3 |
| 30880   | Control  | Female | 10 | 135116379 | 135202090 | 85712 | rs2265900  | rs2480258  | 25 | 3 |
| 61210   | Control  | Female | 10 | 135116379 | 135202090 | 85712 | rs2265900  | rs2480258  | 25 | 3 |
| 61890   | Control  | Male   | 10 | 135116379 | 135202090 | 85712 | rs2265900  | rs2480258  | 25 | 3 |
| 62020   | Control  | Female | 10 | 135116379 | 135202090 | 85712 | rs2265900  | rs2480258  | 25 | 3 |
| 71281   | Control  | Male   | 10 | 135116379 | 135202090 | 85712 | rs2265900  | rs2480258  | 25 | 3 |
| 06D6193 | Control  | Male   | 10 | 135116379 | 135202090 | 85712 | rs2265900  | rs2480258  | 25 | 3 |
| 06D6530 | Control  | Female | 10 | 135116379 | 135202090 | 85712 | rs2265900  | rs2480258  | 25 | 3 |
| 06D6873 | Control  | Male   | 10 | 135116379 | 135202090 | 85712 | rs2265900  | rs2480258  | 25 | 3 |
| 06D6906 | Control  | Female | 10 | 135116379 | 135202090 | 85712 | rs2265900  | rs2480258  | 25 | 3 |
| con007  | Control  | Female | 10 | 135116379 | 135202090 | 85712 | rs2265900  | rs2480258  | 25 | 3 |
| con048  | Control  | Male   | 10 | 135116379 | 135202090 | 85712 | rs2265900  | rs2480258  | 25 | 3 |
| con058  | Control  | Male   | 10 | 135116379 | 135202090 | 85712 | rs2265900  | rs2480258  | 25 | 3 |
| con070  | Control  | Female | 10 | 135116379 | 135202090 | 85712 | rs2265900  | rs2480258  | 25 | 3 |
| 60816   | Affected | Male   | 10 | 724229    | 810868    | 86640 | rs1769236  | rs10752019 | 25 | 3 |
| 06D6264 | Control  | Male   | 10 | 47013328  | 47104196  | 90869 | rs11259779 | rs11259756 | 16 | 3 |
| 10734   | Affected | Male   | 10 | 27652366  | 27745861  | 93496 | rs237605   | rs11015755 | 27 | 1 |
| 40208   | Affected | Male   | 10 | 27652366  | 27745861  | 93496 | rs237605   | rs11015755 | 27 | 1 |
| 52532   | Control  | Female | 10 | 27652366  | 27745861  | 93496 | rs237605   | rs11015755 | 27 | 1 |
| 60191   | Control  | Female | 10 | 27652366  | 27745861  | 93496 | rs237605   | rs11015755 | 27 | 1 |
| 71405   | Control  | Female | 10 | 27652366  | 27745861  | 93496 | rs237605   | rs11015755 | 27 | 1 |
| 06D6711 | Control  | Female | 10 | 27652366  | 27745861  | 93496 | rs237605   | rs11015755 | 27 | 1 |

|         |          |        |    |           |           |         |            |            |     |   |
|---------|----------|--------|----|-----------|-----------|---------|------------|------------|-----|---|
| con052  | Control  | Female | 10 | 27652366  | 27745861  | 93496   | rs237605   | rs11015755 | 27  | 1 |
| 51729   | Affected | Male   | 10 | 76654917  | 76751854  | 96938   | rs1505378  | rs2488696  | 18  | 3 |
| 06D6525 | Control  | Female | 10 | 47013328  | 47110350  | 97023   | rs11259779 | rs12775238 | 17  | 3 |
| 62463   | Control  | Female | 10 | 47058066  | 47157807  | 99742   | rs17835817 | rs7076022  | 26  | 3 |
| 60343   | Affected | Male   | 11 | 23777209  | 25658239  | 1881031 | rs7111329  | rs7930199  | 432 | 1 |
| 61388   | Affected | Female | 11 | 104496850 | 105020174 | 523325  | rs4587693  | rs10791764 | 73  | 3 |
| 60235   | Affected | Female | 11 | 119320458 | 120113871 | 793414  | rs634351   | rs948032   | 181 | 3 |
| 52292   | Affected | Female | 11 | 133817698 | 134392238 | 574541  | rs7935790  | rs1382495  | 203 | 3 |
| 980042  | Control  | Male   | 11 | 4763448   | 4865576   | 102129  | rs12806476 | rs2595982  | 36  | 1 |
| 61479   | Affected | Female | 11 | 4763448   | 4865576   | 102129  | rs12806476 | rs2595982  | 36  | 1 |
| 70610   | Affected | Male   | 11 | 4763448   | 4865576   | 102129  | rs12806476 | rs2595982  | 36  | 1 |
| 60246   | Affected | Male   | 11 | 33089440  | 33474966  | 385527  | rs3117655  | rs2756277  | 39  | 3 |
| 1085    | Affected | Male   | 11 | 33259050  | 33433279  | 174230  | rs16924091 | rs7943651  | 25  | 3 |
| 61717   | Affected | Male   | 11 | 54784999  | 55179162  | 394164  | rs3851113  | rs11230571 | 52  | 3 |
| 06D7070 | Control  | Male   | 11 | 55420386  | 55656373  | 235988  | rs9943659  | rs11606821 | 71  | 1 |
| 981049  | Affected | Male   | 11 | 55841187  | 55991637  | 150451  | rs1871846  | rs688740   | 35  | 1 |
| 06D6499 | Control  | Male   | 11 | 70029656  | 70148281  | 118626  | rs12364154 | rs4980629  | 45  | 1 |
| 960101  | Affected | Male   | 11 | 71544815  | 71939763  | 394949  | rs590586   | rs10793034 | 55  | 1 |
| 61998   | Control  | Male   | 11 | 83700473  | 83941704  | 241232  | rs7106746  | rs7937583  | 68  | 1 |
| 61977   | Control  | Female | 11 | 92621411  | 92823370  | 201960  | rs1446905  | rs2658785  | 45  | 1 |
| 11288   | Affected | Male   | 11 | 92621411  | 92823370  | 201960  | rs1446905  | rs2658785  | 45  | 1 |
| 51563   | Affected | Male   | 11 | 94080501  | 94514354  | 433854  | rs4753145  | rs530190   | 94  | 3 |
| 52144   | Control  | Male   | 11 | 98481670  | 98587547  | 105878  | rs10790462 | rs11606720 | 59  | 1 |
| 06D6467 | Control  | Female | 11 | 98781901  | 98916984  | 135084  | rs7929417  | rs10790789 | 56  | 1 |
| 52563   | Control  | Female | 11 | 122823273 | 122954103 | 130831  | rs2846062  | rs1275056  | 50  | 3 |
| 833     | Affected | Male   | 11 | 132329581 | 132769219 | 439639  | rs4542422  | rs11223462 | 175 | 3 |
| 70802   | Control  | Female | 11 | 132329581 | 132774858 | 445278  | rs4542422  | rs6590694  | 176 | 3 |
| 61152   | Control  | Female | 11 | 132605443 | 132826177 | 220735  | rs12365021 | rs10894683 | 73  | 3 |
| 06D6927 | Control  | Female | 11 | 133823692 | 134226681 | 402990  | rs11223820 | rs11605126 | 162 | 3 |
| 62751   | Affected | Male   | 11 | 5719425   | 5769525   | 50101   | rs1498550  | rs11039054 | 16  | 1 |
| 11361   | Affected | Male   | 11 | 6712358   | 6763819   | 51462   | rs12223079 | rs497681   | 21  | 1 |
| 10806   | Affected | Female | 11 | 133663955 | 133715739 | 51785   | rs3824995  | rs1258852  | 21  | 1 |



|         |          |        |    |           |           |       |           |           |    |   |
|---------|----------|--------|----|-----------|-----------|-------|-----------|-----------|----|---|
| 20372   | Affected | Male   | 11 | 133663955 | 133715739 | 51785 | rs3824995 | rs1258852 | 21 | 1 |
| 20633   | Affected | Male   | 11 | 133663955 | 133715739 | 51785 | rs3824995 | rs1258852 | 21 | 1 |
| 51379   | Affected | Male   | 11 | 133663955 | 133715739 | 51785 | rs3824995 | rs1258852 | 21 | 1 |
| con086  | Control  | Female | 11 | 133663955 | 133715739 | 51785 | rs3824995 | rs1258852 | 21 | 1 |
| 980116  | Control  | Male   | 11 | 1073364   | 1127086   | 53723 | rs7396030 | rs7112954 | 13 | 3 |
| 71145   | Affected | Male   | 11 | 55139733  | 55204003  | 64271 | rs573732  | rs7934845 | 10 | 1 |
| 06D6500 | Control  | Female | 11 | 55139733  | 55204003  | 64271 | rs573732  | rs7934845 | 10 | 1 |
| 06D6852 | Control  | Female | 11 | 55139733  | 55204003  | 64271 | rs573732  | rs7934845 | 10 | 1 |
| 10078   | Affected | Male   | 11 | 95661034  | 95730814  | 69781 | rs499866  | rs2186760 | 17 | 3 |
| 1679    | Affected | Male   | 11 | 55127597  | 55204003  | 76407 | rs2456022 | rs7934845 | 11 | 1 |
| 2089    | Affected | Male   | 11 | 55127597  | 55204003  | 76407 | rs2456022 | rs7934845 | 11 | 1 |
| 11085   | Affected | Female | 11 | 55127597  | 55204003  | 76407 | rs2456022 | rs7934845 | 11 | 1 |
| 11289   | Affected | Female | 11 | 55127597  | 55204003  | 76407 | rs2456022 | rs7934845 | 11 | 1 |
| 11360   | Affected | Male   | 11 | 55127597  | 55204003  | 76407 | rs2456022 | rs7934845 | 11 | 1 |
| 20484   | Affected | Male   | 11 | 55127597  | 55204003  | 76407 | rs2456022 | rs7934845 | 11 | 1 |
| 20496   | Affected | Male   | 11 | 55127597  | 55204003  | 76407 | rs2456022 | rs7934845 | 11 | 1 |
| 20528   | Affected | Male   | 11 | 55127597  | 55204003  | 76407 | rs2456022 | rs7934845 | 11 | 1 |
| 20616   | Affected | Male   | 11 | 55127597  | 55204003  | 76407 | rs2456022 | rs7934845 | 11 | 1 |
| 30803   | Affected | Male   | 11 | 55127597  | 55204003  | 76407 | rs2456022 | rs7934845 | 11 | 1 |
| 30857   | Affected | Male   | 11 | 55127597  | 55204003  | 76407 | rs2456022 | rs7934845 | 11 | 1 |
| 50052   | Affected | Male   | 11 | 55127597  | 55204003  | 76407 | rs2456022 | rs7934845 | 11 | 1 |
| 50072   | Affected | Male   | 11 | 55127597  | 55204003  | 76407 | rs2456022 | rs7934845 | 11 | 1 |
| 51058   | Affected | Female | 11 | 55127597  | 55204003  | 76407 | rs2456022 | rs7934845 | 11 | 1 |
| 51672   | Affected | Female | 11 | 55127597  | 55204003  | 76407 | rs2456022 | rs7934845 | 11 | 1 |
| 52176   | Affected | Female | 11 | 55127597  | 55204003  | 76407 | rs2456022 | rs7934845 | 11 | 1 |
| 60204   | Affected | Male   | 11 | 55127597  | 55204003  | 76407 | rs2456022 | rs7934845 | 11 | 1 |
| 60360   | Affected | Male   | 11 | 55127597  | 55204003  | 76407 | rs2456022 | rs7934845 | 11 | 1 |
| 60908   | Affected | Female | 11 | 55127597  | 55204003  | 76407 | rs2456022 | rs7934845 | 11 | 1 |
| 61362   | Affected | Male   | 11 | 55127597  | 55204003  | 76407 | rs2456022 | rs7934845 | 11 | 1 |
| 61818   | Affected | Male   | 11 | 55127597  | 55204003  | 76407 | rs2456022 | rs7934845 | 11 | 1 |
| 70028   | Affected | Male   | 11 | 55127597  | 55204003  | 76407 | rs2456022 | rs7934845 | 11 | 1 |
| 70596   | Affected | Male   | 11 | 55127597  | 55204003  | 76407 | rs2456022 | rs7934845 | 11 | 1 |

|        |          |        |    |          |          |       |           |           |    |   |
|--------|----------|--------|----|----------|----------|-------|-----------|-----------|----|---|
| 71020  | Affected | Male   | 11 | 55127597 | 55204003 | 76407 | rs2456022 | rs7934845 | 11 | 1 |
| 960361 | Affected | Male   | 11 | 55127597 | 55204003 | 76407 | rs2456022 | rs7934845 | 11 | 1 |
| 1793   | Affected | Male   | 11 | 55127597 | 55204003 | 76407 | rs2456022 | rs7934845 | 11 | 0 |
| 11318  | Affected | Male   | 11 | 55127597 | 55204003 | 76407 | rs2456022 | rs7934845 | 11 | 0 |
| 11328  | Affected | Male   | 11 | 55127597 | 55204003 | 76407 | rs2456022 | rs7934845 | 11 | 0 |
| 11404  | Affected | Female | 11 | 55127597 | 55204003 | 76407 | rs2456022 | rs7934845 | 11 | 0 |
| 11522  | Affected | Female | 11 | 55127597 | 55204003 | 76407 | rs2456022 | rs7934845 | 11 | 0 |
| 20345  | Affected | Male   | 11 | 55127597 | 55204003 | 76407 | rs2456022 | rs7934845 | 11 | 0 |
| 20610  | Affected | Female | 11 | 55127597 | 55204003 | 76407 | rs2456022 | rs7934845 | 11 | 0 |
| 30392  | Affected | Female | 11 | 55127597 | 55204003 | 76407 | rs2456022 | rs7934845 | 11 | 0 |
| 30661  | Affected | Male   | 11 | 55127597 | 55204003 | 76407 | rs2456022 | rs7934845 | 11 | 0 |
| 30931  | Affected | Male   | 11 | 55127597 | 55204003 | 76407 | rs2456022 | rs7934845 | 11 | 0 |
| 40133  | Affected | Male   | 11 | 55127597 | 55204003 | 76407 | rs2456022 | rs7934845 | 11 | 0 |
| 50416  | Affected | Male   | 11 | 55127597 | 55204003 | 76407 | rs2456022 | rs7934845 | 11 | 0 |
| 50737  | Affected | Female | 11 | 55127597 | 55204003 | 76407 | rs2456022 | rs7934845 | 11 | 0 |
| 51187  | Affected | Female | 11 | 55127597 | 55204003 | 76407 | rs2456022 | rs7934845 | 11 | 0 |
| 51476  | Affected | Male   | 11 | 55127597 | 55204003 | 76407 | rs2456022 | rs7934845 | 11 | 0 |
| 52181  | Affected | Female | 11 | 55127597 | 55204003 | 76407 | rs2456022 | rs7934845 | 11 | 0 |
| 52184  | Affected | Male   | 11 | 55127597 | 55204003 | 76407 | rs2456022 | rs7934845 | 11 | 0 |
| 52291  | Affected | Female | 11 | 55127597 | 55204003 | 76407 | rs2456022 | rs7934845 | 11 | 0 |
| 52331  | Affected | Male   | 11 | 55127597 | 55204003 | 76407 | rs2456022 | rs7934845 | 11 | 0 |
| 60400  | Affected | Male   | 11 | 55127597 | 55204003 | 76407 | rs2456022 | rs7934845 | 11 | 0 |
| 60627  | Affected | Female | 11 | 55127597 | 55204003 | 76407 | rs2456022 | rs7934845 | 11 | 0 |
| 60799  | Affected | Male   | 11 | 55127597 | 55204003 | 76407 | rs2456022 | rs7934845 | 11 | 0 |
| 60822  | Affected | Male   | 11 | 55127597 | 55204003 | 76407 | rs2456022 | rs7934845 | 11 | 0 |
| 61038  | Affected | Male   | 11 | 55127597 | 55204003 | 76407 | rs2456022 | rs7934845 | 11 | 0 |
| 61226  | Affected | Female | 11 | 55127597 | 55204003 | 76407 | rs2456022 | rs7934845 | 11 | 0 |
| 61357  | Affected | Male   | 11 | 55127597 | 55204003 | 76407 | rs2456022 | rs7934845 | 11 | 0 |
| 61670  | Affected | Male   | 11 | 55127597 | 55204003 | 76407 | rs2456022 | rs7934845 | 11 | 0 |
| 61748  | Affected | Male   | 11 | 55127597 | 55204003 | 76407 | rs2456022 | rs7934845 | 11 | 0 |
| 62246  | Affected | Male   | 11 | 55127597 | 55204003 | 76407 | rs2456022 | rs7934845 | 11 | 0 |
| 62607  | Affected | Male   | 11 | 55127597 | 55204003 | 76407 | rs2456022 | rs7934845 | 11 | 0 |

|        |          |        |    |          |          |       |           |           |    |   |
|--------|----------|--------|----|----------|----------|-------|-----------|-----------|----|---|
| 70038  | Affected | Male   | 11 | 55127597 | 55204003 | 76407 | rs2456022 | rs7934845 | 11 | 0 |
| 70269  | Affected | Female | 11 | 55127597 | 55204003 | 76407 | rs2456022 | rs7934845 | 11 | 0 |
| 70298  | Affected | Male   | 11 | 55127597 | 55204003 | 76407 | rs2456022 | rs7934845 | 11 | 0 |
| 70590  | Affected | Male   | 11 | 55127597 | 55204003 | 76407 | rs2456022 | rs7934845 | 11 | 0 |
| 70615  | Affected | Female | 11 | 55127597 | 55204003 | 76407 | rs2456022 | rs7934845 | 11 | 0 |
| 71174  | Affected | Female | 11 | 55127597 | 55204003 | 76407 | rs2456022 | rs7934845 | 11 | 0 |
| 71380  | Affected | Male   | 11 | 55127597 | 55204003 | 76407 | rs2456022 | rs7934845 | 11 | 0 |
| 71400  | Affected | Male   | 11 | 55127597 | 55204003 | 76407 | rs2456022 | rs7934845 | 11 | 0 |
| 72439  | Affected | Male   | 11 | 55127597 | 55204003 | 76407 | rs2456022 | rs7934845 | 11 | 0 |
| 960434 | Affected | Female | 11 | 55127597 | 55204003 | 76407 | rs2456022 | rs7934845 | 11 | 0 |
| 970166 | Affected | Male   | 11 | 55127597 | 55204003 | 76407 | rs2456022 | rs7934845 | 11 | 0 |
| 970236 | Affected | Male   | 11 | 55127597 | 55204003 | 76407 | rs2456022 | rs7934845 | 11 | 0 |
| 980503 | Affected | Male   | 11 | 55127597 | 55204003 | 76407 | rs2456022 | rs7934845 | 11 | 0 |
| 52359  | Control  | Female | 11 | 55127597 | 55204003 | 76407 | rs2456022 | rs7934845 | 11 | 1 |
| 60223  | Control  | Male   | 11 | 55127597 | 55204003 | 76407 | rs2456022 | rs7934845 | 11 | 1 |
| 62076  | Control  | Female | 11 | 55127597 | 55204003 | 76407 | rs2456022 | rs7934845 | 11 | 1 |
| 71403  | Control  | Male   | 11 | 55127597 | 55204003 | 76407 | rs2456022 | rs7934845 | 11 | 1 |
| 71413  | Control  | Female | 11 | 55127597 | 55204003 | 76407 | rs2456022 | rs7934845 | 11 | 1 |
| 30880  | Control  | Female | 11 | 55127597 | 55204003 | 76407 | rs2456022 | rs7934845 | 11 | 0 |
| 51359  | Control  | Female | 11 | 55127597 | 55204003 | 76407 | rs2456022 | rs7934845 | 11 | 0 |
| 51452  | Control  | Male   | 11 | 55127597 | 55204003 | 76407 | rs2456022 | rs7934845 | 11 | 0 |
| 52036  | Control  | Male   | 11 | 55127597 | 55204003 | 76407 | rs2456022 | rs7934845 | 11 | 0 |
| 52228  | Control  | Female | 11 | 55127597 | 55204003 | 76407 | rs2456022 | rs7934845 | 11 | 0 |
| 52403  | Control  | Male   | 11 | 55127597 | 55204003 | 76407 | rs2456022 | rs7934845 | 11 | 0 |
| 52524  | Control  | Male   | 11 | 55127597 | 55204003 | 76407 | rs2456022 | rs7934845 | 11 | 0 |
| 60106  | Control  | Female | 11 | 55127597 | 55204003 | 76407 | rs2456022 | rs7934845 | 11 | 0 |
| 60363  | Control  | Female | 11 | 55127597 | 55204003 | 76407 | rs2456022 | rs7934845 | 11 | 0 |
| 60895  | Control  | Female | 11 | 55127597 | 55204003 | 76407 | rs2456022 | rs7934845 | 11 | 0 |
| 60933  | Control  | Female | 11 | 55127597 | 55204003 | 76407 | rs2456022 | rs7934845 | 11 | 0 |
| 61011  | Control  | Female | 11 | 55127597 | 55204003 | 76407 | rs2456022 | rs7934845 | 11 | 0 |
| 61013  | Control  | Male   | 11 | 55127597 | 55204003 | 76407 | rs2456022 | rs7934845 | 11 | 0 |
| 61151  | Control  | Male   | 11 | 55127597 | 55204003 | 76407 | rs2456022 | rs7934845 | 11 | 0 |

|         |          |        |    |           |           |         |            |            |     |   |
|---------|----------|--------|----|-----------|-----------|---------|------------|------------|-----|---|
| 61863   | Control  | Female | 11 | 55127597  | 55204003  | 76407   | rs2456022  | rs7934845  | 11  | 0 |
| 62247   | Control  | Male   | 11 | 55127597  | 55204003  | 76407   | rs2456022  | rs7934845  | 11  | 0 |
| 62443   | Control  | Female | 11 | 55127597  | 55204003  | 76407   | rs2456022  | rs7934845  | 11  | 0 |
| 62545   | Control  | Male   | 11 | 55127597  | 55204003  | 76407   | rs2456022  | rs7934845  | 11  | 0 |
| 62818   | Control  | Male   | 11 | 55127597  | 55204003  | 76407   | rs2456022  | rs7934845  | 11  | 0 |
| 70251   | Control  | Female | 11 | 55127597  | 55204003  | 76407   | rs2456022  | rs7934845  | 11  | 0 |
| 970476  | Control  | Female | 11 | 55127597  | 55204003  | 76407   | rs2456022  | rs7934845  | 11  | 0 |
| 970862  | Control  | Female | 11 | 55127597  | 55204003  | 76407   | rs2456022  | rs7934845  | 11  | 0 |
| 06D6216 | Control  | Female | 11 | 55127597  | 55204003  | 76407   | rs2456022  | rs7934845  | 11  | 0 |
| 06D6341 | Control  | Female | 11 | 55127597  | 55204003  | 76407   | rs2456022  | rs7934845  | 11  | 0 |
| 06D6373 | Control  | Female | 11 | 55127597  | 55204003  | 76407   | rs2456022  | rs7934845  | 11  | 0 |
| 06D6530 | Control  | Female | 11 | 55127597  | 55204003  | 76407   | rs2456022  | rs7934845  | 11  | 0 |
| 06D7077 | Control  | Female | 11 | 55127597  | 55204003  | 76407   | rs2456022  | rs7934845  | 11  | 0 |
| con005  | Control  | Female | 11 | 55127597  | 55204003  | 76407   | rs2456022  | rs7934845  | 11  | 0 |
| 52519   | Affected | Female | 11 | 36400971  | 36484601  | 83631   | rs7951020  | rs520074   | 37  | 3 |
| 60363   | Control  | Female | 12 | 864191    | 1407515   | 543325  | rs7300444  | rs16928422 | 87  | 3 |
| 70510   | Affected | Female | 12 | 17122370  | 18514308  | 1391939 | rs1441696  | rs1447408  | 256 | 3 |
| 20475   | Affected | Male   | 12 | 29224176  | 32830870  | 3606695 | rs10843339 | rs7960630  | 970 | 1 |
| 20530   | Affected | Female | 12 | 33434487  | 34008675  | 574189  | rs1905416  | rs406753   | 71  | 1 |
| 62566   | Control  | Male   | 12 | 71276461  | 71859679  | 583219  | rs10506659 | rs2138429  | 86  | 3 |
| 51619   | Control  | Male   | 12 | 126789194 | 127472548 | 683355  | rs11059329 | rs10847613 | 233 | 3 |
| 72460   | Control  | Female | 12 | 1099757   | 1477651   | 377895  | rs11829288 | rs10848495 | 60  | 1 |
| 30804   | Control  | Female | 12 | 3944655   | 4316338   | 371684  | rs658719   | rs7306862  | 93  | 3 |
| 60983   | Affected | Male   | 12 | 4088886   | 4246755   | 157870  | rs4765769  | rs10849027 | 40  | 1 |
| 62443   | Control  | Female | 12 | 6993337   | 7193249   | 199913  | rs9668071  | rs3816423  | 33  | 3 |
| 61615   | Affected | Male   | 12 | 7876208   | 8014573   | 138366  | rs7970550  | rs7307261  | 26  | 3 |
| 20349   | Affected | Male   | 12 | 7884583   | 7990569   | 105987  | rs2889545  | rs1473164  | 24  | 3 |
| 62612   | Control  | Male   | 12 | 7884583   | 7990569   | 105987  | rs2889545  | rs1473164  | 24  | 3 |
| 61877   | Control  | Female | 12 | 7884583   | 7990569   | 105987  | rs2889545  | rs1473164  | 24  | 3 |
| 40206   | Affected | Male   | 12 | 7884583   | 7990569   | 105987  | rs2889545  | rs1473164  | 24  | 3 |
| 20617   | Affected | Male   | 12 | 7884583   | 7990569   | 105987  | rs2889545  | rs1473164  | 24  | 3 |
| 62497   | Control  | Male   | 12 | 7884583   | 7990569   | 105987  | rs2889545  | rs1473164  | 24  | 3 |

|         |          |        |    |         |         |        |           |           |    |   |
|---------|----------|--------|----|---------|---------|--------|-----------|-----------|----|---|
| 61305   | Control  | Female | 12 | 7884583 | 7990569 | 105987 | rs2889545 | rs1473164 | 24 | 3 |
| 11238   | Affected | Female | 12 | 7884583 | 7990569 | 105987 | rs2889545 | rs1473164 | 24 | 3 |
| 1352    | Affected | Male   | 12 | 7884583 | 8014573 | 129991 | rs2889545 | rs7307261 | 25 | 3 |
| 11336   | Affected | Female | 12 | 7884583 | 8014573 | 129991 | rs2889545 | rs7307261 | 25 | 3 |
| 980728  | Affected | Female | 12 | 7884583 | 8014573 | 129991 | rs2889545 | rs7307261 | 25 | 3 |
| 805     | Affected | Male   | 12 | 7884583 | 8014573 | 129991 | rs2889545 | rs7307261 | 25 | 3 |
| 51961   | Control  | Female | 12 | 7884583 | 8014573 | 129991 | rs2889545 | rs7307261 | 25 | 3 |
| 11360   | Affected | Male   | 12 | 7884583 | 8014573 | 129991 | rs2889545 | rs7307261 | 25 | 3 |
| 60691   | Affected | Male   | 12 | 7884583 | 8017012 | 132430 | rs2889545 | rs6488801 | 26 | 3 |
| 61333   | Control  | Male   | 12 | 7884583 | 8017012 | 132430 | rs2889545 | rs6488801 | 26 | 3 |
| 61641   | Affected | Female | 12 | 7884583 | 8017012 | 132430 | rs2889545 | rs6488801 | 26 | 3 |
| con072  | Control  | Male   | 12 | 7884583 | 8017012 | 132430 | rs2889545 | rs6488801 | 26 | 3 |
| 62196   | Control  | Female | 12 | 7884583 | 8017012 | 132430 | rs2889545 | rs6488801 | 26 | 3 |
| 60032   | Affected | Male   | 12 | 7884583 | 8017012 | 132430 | rs2889545 | rs6488801 | 26 | 3 |
| 06D6637 | Control  | Female | 12 | 7884583 | 8017012 | 132430 | rs2889545 | rs6488801 | 26 | 3 |
| 52467   | Control  | Female | 12 | 7884583 | 8017012 | 132430 | rs2889545 | rs6488801 | 26 | 3 |
| 51326   | Affected | Female | 12 | 7884583 | 8017012 | 132430 | rs2889545 | rs6488801 | 26 | 3 |
| 61417   | Control  | Female | 12 | 7884583 | 8017012 | 132430 | rs2889545 | rs6488801 | 26 | 3 |
| 06D6315 | Control  | Female | 12 | 7884583 | 8017012 | 132430 | rs2889545 | rs6488801 | 26 | 3 |
| con082  | Control  | Male   | 12 | 7884583 | 8017012 | 132430 | rs2889545 | rs6488801 | 26 | 3 |
| 970877  | Affected | Female | 12 | 7884583 | 8017012 | 132430 | rs2889545 | rs6488801 | 26 | 3 |
| 61676   | Control  | Male   | 12 | 7884583 | 8017012 | 132430 | rs2889545 | rs6488801 | 26 | 3 |
| 61308   | Affected | Male   | 12 | 7884583 | 8017012 | 132430 | rs2889545 | rs6488801 | 26 | 3 |
| 70403   | Affected | Male   | 12 | 7884583 | 8017012 | 132430 | rs2889545 | rs6488801 | 26 | 3 |
| 60809   | Affected | Male   | 12 | 7884583 | 8017012 | 132430 | rs2889545 | rs6488801 | 26 | 3 |
| 60086   | Control  | Female | 12 | 7884583 | 8017012 | 132430 | rs2889545 | rs6488801 | 26 | 3 |
| 62034   | Control  | Male   | 12 | 7884583 | 8017012 | 132430 | rs2889545 | rs6488801 | 26 | 3 |
| 60530   | Control  | Female | 12 | 7884583 | 8017012 | 132430 | rs2889545 | rs6488801 | 26 | 3 |
| 971     | Affected | Female | 12 | 7884583 | 8017012 | 132430 | rs2889545 | rs6488801 | 26 | 3 |
| 50979   | Affected | Male   | 12 | 7884583 | 8017012 | 132430 | rs2889545 | rs6488801 | 26 | 3 |
| 51359   | Control  | Female | 12 | 7884583 | 8017012 | 132430 | rs2889545 | rs6488801 | 26 | 3 |
| 70610   | Affected | Male   | 12 | 7884583 | 8017012 | 132430 | rs2889545 | rs6488801 | 26 | 3 |

|         |          |        |    |          |          |        |            |            |    |   |
|---------|----------|--------|----|----------|----------|--------|------------|------------|----|---|
| 71064   | Affected | Male   | 12 | 7884583  | 8017012  | 132430 | rs2889545  | rs6488801  | 26 | 3 |
| 833     | Affected | Male   | 12 | 7884583  | 8017012  | 132430 | rs2889545  | rs6488801  | 26 | 3 |
| 52120   | Affected | Male   | 12 | 7884583  | 8017012  | 132430 | rs2889545  | rs6488801  | 26 | 3 |
| 20527   | Affected | Male   | 12 | 7884583  | 8017012  | 132430 | rs2889545  | rs6488801  | 26 | 3 |
| 1085    | Affected | Male   | 12 | 7884583  | 8017012  | 132430 | rs2889545  | rs6488801  | 26 | 3 |
| 1653    | Affected | Female | 12 | 7884583  | 8017012  | 132430 | rs2889545  | rs6488801  | 26 | 3 |
| 31119   | Affected | Male   | 12 | 7884583  | 8017012  | 132430 | rs2889545  | rs6488801  | 26 | 3 |
| 61148   | Affected | Male   | 12 | 7888157  | 7990569  | 102413 | rs11056079 | rs1473164  | 23 | 1 |
| 62662   | Control  | Female | 12 | 7888157  | 7990569  | 102413 | rs11056079 | rs1473164  | 23 | 1 |
| 51656   | Control  | Female | 12 | 7888157  | 7990569  | 102413 | rs11056079 | rs1473164  | 23 | 3 |
| 50416   | Affected | Male   | 12 | 7888157  | 7990569  | 102413 | rs11056079 | rs1473164  | 23 | 3 |
| 50397   | Affected | Female | 12 | 7888157  | 7990569  | 102413 | rs11056079 | rs1473164  | 23 | 3 |
| 52175   | Control  | Female | 12 | 7888157  | 8014573  | 126417 | rs11056079 | rs7307261  | 24 | 1 |
| 10806   | Affected | Female | 12 | 7888157  | 8014573  | 126417 | rs11056079 | rs7307261  | 24 | 1 |
| 60781   | Control  | Male   | 12 | 7888157  | 8014573  | 126417 | rs11056079 | rs7307261  | 24 | 3 |
| 06D6467 | Control  | Female | 12 | 7888157  | 8017012  | 128856 | rs11056079 | rs6488801  | 25 | 3 |
| 52519   | Affected | Female | 12 | 7888157  | 8017012  | 128856 | rs11056079 | rs6488801  | 25 | 3 |
| 62073   | Affected | Male   | 12 | 7888157  | 8017012  | 128856 | rs11056079 | rs6488801  | 25 | 3 |
| 70433   | Control  | Female | 12 | 7888157  | 8017012  | 128856 | rs11056079 | rs6488801  | 25 | 3 |
| 62076   | Control  | Female | 12 | 7888157  | 8017012  | 128856 | rs11056079 | rs6488801  | 25 | 3 |
| 60192   | Affected | Male   | 12 | 7891603  | 8014573  | 122971 | rs7965203  | rs7307261  | 23 | 1 |
| 41889   | Affected | Male   | 12 | 7891603  | 8014573  | 122971 | rs7965203  | rs7307261  | 23 | 1 |
| 62567   | Control  | Male   | 12 | 7891603  | 8014573  | 122971 | rs7965203  | rs7307261  | 23 | 3 |
| con056  | Control  | Female | 12 | 7891603  | 8017012  | 125410 | rs7965203  | rs6488801  | 24 | 1 |
| 62850   | Affected | Male   | 12 | 7891603  | 8017012  | 125410 | rs7965203  | rs6488801  | 24 | 1 |
| 1780    | Affected | Female | 12 | 7899399  | 8017012  | 117614 | rs2889504  | rs6488801  | 22 | 3 |
| 61794   | Control  | Female | 12 | 7899399  | 8017012  | 117614 | rs2889504  | rs6488801  | 22 | 3 |
| 60028   | Control  | Female | 12 | 8496483  | 8665794  | 169312 | rs6487136  | rs12321209 | 34 | 1 |
| 52208   | Control  | Female | 12 | 19358223 | 19469374 | 111152 | rs7297169  | rs2961365  | 21 | 3 |
| 70433   | Control  | Female | 12 | 19358223 | 19478849 | 120627 | rs7297169  | rs2638413  | 24 | 3 |
| 11303   | Affected | Male   | 12 | 19358223 | 19478849 | 120627 | rs7297169  | rs2638413  | 24 | 3 |
| 52030   | Control  | Female | 12 | 19364102 | 19469374 | 105273 | rs12825616 | rs2961365  | 19 | 3 |

|         |          |        |    |          |          |        |            |            |    |   |
|---------|----------|--------|----|----------|----------|--------|------------|------------|----|---|
| 970476  | Control  | Female | 12 | 20820070 | 20947982 | 127913 | rs1588918  | rs12824715 | 19 | 1 |
| 06D6906 | Control  | Female | 12 | 20820070 | 20947982 | 127913 | rs1588918  | rs12824715 | 19 | 1 |
| 70475   | Control  | Female | 12 | 20901315 | 21296099 | 394785 | rs2900474  | rs7975087  | 72 | 1 |
| 61997   | Control  | Male   | 12 | 20901315 | 21296099 | 394785 | rs2900474  | rs7975087  | 72 | 1 |
| 30788   | Control  | Female | 12 | 27229452 | 27437644 | 208193 | rs4265668  | rs11048998 | 52 | 3 |
| 30788   | Control  | Female | 12 | 27520009 | 27679741 | 159733 | rs6487610  | rs1002422  | 65 | 3 |
| con010  | Control  | Female | 12 | 28347265 | 28496693 | 149429 | rs7316831  | rs10771427 | 32 | 1 |
| con045  | Control  | Male   | 12 | 28394989 | 28496693 | 101705 | rs11049548 | rs10771427 | 22 | 1 |
| 62373   | Control  | Female | 12 | 31101381 | 31298174 | 196794 | rs244496   | rs1025624  | 32 | 3 |
| 1780    | Affected | Female | 12 | 31132612 | 31298174 | 165563 | rs10843881 | rs1025624  | 30 | 3 |
| 06D6475 | Control  | Male   | 12 | 31152226 | 31296067 | 143842 | rs731137   | rs658587   | 27 | 3 |
| 52213   | Affected | Male   | 12 | 31152226 | 31298174 | 145949 | rs731137   | rs1025624  | 29 | 3 |
| 30842   | Affected | Male   | 12 | 31152226 | 31298174 | 145949 | rs731137   | rs1025624  | 29 | 3 |
| 71064   | Affected | Male   | 12 | 31157554 | 31293957 | 136404 | rs4931434  | rs684454   | 25 | 3 |
| 61381   | Control  | Male   | 12 | 31157554 | 31296067 | 138514 | rs4931434  | rs658587   | 26 | 3 |
| 52566   | Control  | Female | 12 | 31157554 | 31296067 | 138514 | rs4931434  | rs658587   | 26 | 3 |
| 60518   | Control  | Male   | 12 | 31157554 | 31296067 | 138514 | rs4931434  | rs658587   | 26 | 3 |
| 11356   | Affected | Male   | 12 | 31157554 | 31298174 | 140621 | rs4931434  | rs1025624  | 28 | 3 |
| 60235   | Affected | Female | 12 | 31157554 | 31298174 | 140621 | rs4931434  | rs1025624  | 28 | 3 |
| 06D6418 | Control  | Male   | 12 | 31157554 | 31298174 | 140621 | rs4931434  | rs1025624  | 28 | 3 |
| 60095   | Control  | Female | 12 | 31157554 | 31298174 | 140621 | rs4931434  | rs1025624  | 28 | 3 |
| 51888   | Affected | Male   | 12 | 31157554 | 31298174 | 140621 | rs4931434  | rs1025624  | 28 | 3 |
| 52236   | Control  | Male   | 12 | 31157554 | 31298174 | 140621 | rs4931434  | rs1025624  | 28 | 3 |
| 60531   | Control  | Male   | 12 | 31157554 | 31298174 | 140621 | rs4931434  | rs1025624  | 28 | 3 |
| 62073   | Affected | Male   | 12 | 31157554 | 31298174 | 140621 | rs4931434  | rs1025624  | 28 | 3 |
| 30921   | Affected | Male   | 12 | 31157554 | 31298174 | 140621 | rs4931434  | rs1025624  | 28 | 3 |
| 71128   | Control  | Female | 12 | 31157554 | 31298174 | 140621 | rs4931434  | rs1025624  | 28 | 3 |
| 20229   | Affected | Male   | 12 | 31157554 | 31298174 | 140621 | rs4931434  | rs1025624  | 28 | 3 |
| 20532   | Affected | Male   | 12 | 31157554 | 31298174 | 140621 | rs4931434  | rs1025624  | 28 | 3 |
| 11332   | Affected | Female | 12 | 31157554 | 31298174 | 140621 | rs4931434  | rs1025624  | 28 | 3 |
| 61034   | Control  | Female | 12 | 31157554 | 31300846 | 143293 | rs4931434  | rs617372   | 29 | 3 |
| 61641   | Affected | Female | 12 | 31180151 | 31298174 | 118024 | rs4931444  | rs1025624  | 27 | 3 |

|        |          |        |    |           |           |        |            |            |    |   |
|--------|----------|--------|----|-----------|-----------|--------|------------|------------|----|---|
| 61332  | Affected | Male   | 12 | 31180151  | 31298174  | 118024 | rs4931444  | rs1025624  | 27 | 3 |
| 70492  | Affected | Female | 12 | 31180151  | 31298174  | 118024 | rs4931444  | rs1025624  | 27 | 3 |
| 71417  | Affected | Male   | 12 | 31180151  | 31298174  | 118024 | rs4931444  | rs1025624  | 27 | 3 |
| 70192  | Affected | Female | 12 | 31180151  | 31298174  | 118024 | rs4931444  | rs1025624  | 27 | 3 |
| 20635  | Affected | Female | 12 | 31180151  | 31298174  | 118024 | rs4931444  | rs1025624  | 27 | 3 |
| 51644  | Affected | Female | 12 | 31180151  | 31298174  | 118024 | rs4931444  | rs1025624  | 27 | 3 |
| 50079  | Affected | Male   | 12 | 31180151  | 31298174  | 118024 | rs4931444  | rs1025624  | 27 | 3 |
| 960334 | Affected | Male   | 12 | 31187184  | 31298174  | 110991 | rs10843893 | rs1025624  | 26 | 3 |
| 52346  | Affected | Male   | 12 | 31187184  | 31298174  | 110991 | rs10843893 | rs1025624  | 26 | 3 |
| 51760  | Affected | Male   | 12 | 31187184  | 31298174  | 110991 | rs10843893 | rs1025624  | 26 | 3 |
| 52172  | Control  | Female | 12 | 38853914  | 39058810  | 204897 | rs2638247  | rs11176330 | 73 | 1 |
| 62169  | Control  | Male   | 12 | 45537094  | 45768933  | 231840 | rs2263487  | rs739706   | 41 | 3 |
| 30763  | Control  | Male   | 12 | 46227031  | 46330773  | 103743 | rs7958908  | rs1233057  | 23 | 4 |
| 61291  | Affected | Male   | 12 | 49517328  | 49666499  | 149172 | rs10876099 | rs149411   | 24 | 3 |
| 20481  | Affected | Male   | 12 | 54945126  | 55139498  | 194373 | rs1274500  | rs7313455  | 23 | 3 |
| 52222  | Affected | Male   | 12 | 82033274  | 82157215  | 123942 | rs11115597 | rs12426701 | 35 | 3 |
| 50186  | Affected | Male   | 12 | 112749210 | 112962947 | 213738 | rs11066776 | rs11066904 | 67 | 3 |
| 70357  | Affected | Male   | 12 | 5448916   | 5499193   | 50278  | rs12370969 | rs4073042  | 22 | 3 |
| 62586  | Control  | Male   | 12 | 50993015  | 51047946  | 54932  | rs4761861  | rs1791625  | 25 | 3 |
| 40133  | Affected | Male   | 12 | 7932188   | 7990569   | 58382  | rs17800848 | rs1473164  | 13 | 1 |
| 10078  | Affected | Male   | 12 | 31895437  | 31954269  | 58833  | rs7980890  | rs1150990  | 24 | 3 |
| 11290  | Affected | Female | 12 | 31895437  | 31954269  | 58833  | rs7980890  | rs1150990  | 24 | 3 |
| 11336  | Affected | Female | 12 | 31895437  | 31954269  | 58833  | rs7980890  | rs1150990  | 24 | 3 |
| 11554  | Affected | Male   | 12 | 31895437  | 31954269  | 58833  | rs7980890  | rs1150990  | 24 | 3 |
| 20355  | Affected | Female | 12 | 31895437  | 31954269  | 58833  | rs7980890  | rs1150990  | 24 | 3 |
| 20498  | Affected | Male   | 12 | 31895437  | 31954269  | 58833  | rs7980890  | rs1150990  | 24 | 3 |
| 20511  | Affected | Male   | 12 | 31895437  | 31954269  | 58833  | rs7980890  | rs1150990  | 24 | 3 |
| 30832  | Affected | Male   | 12 | 31895437  | 31954269  | 58833  | rs7980890  | rs1150990  | 24 | 3 |
| 50331  | Affected | Male   | 12 | 31895437  | 31954269  | 58833  | rs7980890  | rs1150990  | 24 | 3 |
| 51723  | Affected | Female | 12 | 31895437  | 31954269  | 58833  | rs7980890  | rs1150990  | 24 | 3 |
| 70026  | Affected | Female | 12 | 31895437  | 31954269  | 58833  | rs7980890  | rs1150990  | 24 | 3 |
| 71174  | Affected | Female | 12 | 31895437  | 31954269  | 58833  | rs7980890  | rs1150990  | 24 | 3 |



|         |          |        |    |          |          |       |            |            |    |   |
|---------|----------|--------|----|----------|----------|-------|------------|------------|----|---|
| 52192   | Control  | Male   | 12 | 31895437 | 31954269 | 58833 | rs7980890  | rs1150990  | 24 | 3 |
| 52323   | Control  | Female | 12 | 31895437 | 31954269 | 58833 | rs7980890  | rs1150990  | 24 | 3 |
| 61703   | Control  | Female | 12 | 31895437 | 31954269 | 58833 | rs7980890  | rs1150990  | 24 | 3 |
| 06D6905 | Control  | Male   | 12 | 31895437 | 31954269 | 58833 | rs7980890  | rs1150990  | 24 | 3 |
| 970814  | Control  | Female | 12 | 50981897 | 51043180 | 61284 | rs1894033  | rs10876280 | 30 | 3 |
| 993     | Affected | Male   | 12 | 31892782 | 31954269 | 61488 | rs2128611  | rs1150990  | 25 | 3 |
| 11318   | Affected | Male   | 12 | 31892782 | 31954269 | 61488 | rs2128611  | rs1150990  | 25 | 3 |
| 20406   | Affected | Male   | 12 | 31892782 | 31954269 | 61488 | rs2128611  | rs1150990  | 25 | 3 |
| 61983   | Affected | Male   | 12 | 31892782 | 31954269 | 61488 | rs2128611  | rs1150990  | 25 | 3 |
| 30926   | Control  | Male   | 12 | 31892782 | 31954269 | 61488 | rs2128611  | rs1150990  | 25 | 3 |
| 60191   | Control  | Female | 12 | 31892782 | 31954269 | 61488 | rs2128611  | rs1150990  | 25 | 3 |
| 61060   | Control  | Female | 12 | 31892782 | 31954269 | 61488 | rs2128611  | rs1150990  | 25 | 3 |
| 61383   | Control  | Female | 12 | 31892782 | 31954269 | 61488 | rs2128611  | rs1150990  | 25 | 3 |
| 70518   | Control  | Male   | 12 | 31892782 | 31954269 | 61488 | rs2128611  | rs1150990  | 25 | 3 |
| 71036   | Control  | Female | 12 | 31892782 | 31954269 | 61488 | rs2128611  | rs1150990  | 25 | 3 |
| 10972   | Affected | Male   | 12 | 21169459 | 21232363 | 62905 | rs11045776 | rs11045834 | 24 | 1 |
| 20484   | Affected | Male   | 12 | 94821290 | 94884637 | 63348 | rs6538683  | rs1025607  | 27 | 1 |
| 40206   | Affected | Male   | 12 | 31889248 | 31954269 | 65022 | rs2186010  | rs1150990  | 26 | 3 |
| 50167   | Affected | Male   | 12 | 31889248 | 31954269 | 65022 | rs2186010  | rs1150990  | 26 | 3 |
| 61226   | Affected | Female | 12 | 31889248 | 31954269 | 65022 | rs2186010  | rs1150990  | 26 | 3 |
| 72791   | Affected | Male   | 12 | 31889248 | 31954269 | 65022 | rs2186010  | rs1150990  | 26 | 3 |
| 52369   | Control  | Female | 12 | 31889248 | 31954269 | 65022 | rs2186010  | rs1150990  | 26 | 3 |
| 52571   | Control  | Female | 12 | 31889248 | 31954269 | 65022 | rs2186010  | rs1150990  | 26 | 3 |
| 60223   | Control  | Male   | 12 | 31889248 | 31954269 | 65022 | rs2186010  | rs1150990  | 26 | 3 |
| 71070   | Control  | Female | 12 | 31889248 | 31954269 | 65022 | rs2186010  | rs1150990  | 26 | 3 |
| 06D6264 | Control  | Male   | 12 | 31889248 | 31954269 | 65022 | rs2186010  | rs1150990  | 26 | 3 |
| 06D6265 | Control  | Female | 12 | 31889248 | 31954269 | 65022 | rs2186010  | rs1150990  | 26 | 3 |
| 60811   | Control  | Male   | 12 | 50981897 | 51047946 | 66050 | rs1894033  | rs1791625  | 31 | 3 |
| 52331   | Affected | Male   | 12 | 31226070 | 31293957 | 67888 | rs11051303 | rs684454   | 20 | 3 |
| 62851   | Affected | Female | 12 | 64079    | 132302   | 68224 | rs4980929  | rs2887340  | 23 | 3 |
| 52398   | Control  | Male   | 12 | 19384370 | 19452810 | 68441 | rs10770476 | rs7304081  | 16 | 3 |
| 06D6339 | Control  | Female | 12 | 19384370 | 19452810 | 68441 | rs10770476 | rs7304081  | 16 | 3 |

|         |          |        |    |           |           |       |            |            |    |   |
|---------|----------|--------|----|-----------|-----------|-------|------------|------------|----|---|
| 1227    | Affected | Female | 12 | 80099826  | 80169986  | 70161 | rs12425311 | rs1921057  | 11 | 3 |
| 2048    | Affected | Male   | 12 | 106929893 | 107000267 | 70375 | rs1896058  | rs17318454 | 16 | 1 |
| 30845   | Affected | Male   | 12 | 106929893 | 107000267 | 70375 | rs1896058  | rs17318454 | 16 | 1 |
| 60804   | Control  | Male   | 12 | 50993015  | 51063780  | 70766 | rs4761861  | rs2245203  | 33 | 3 |
| 1975    | Affected | Male   | 12 | 31226070  | 31298174  | 72105 | rs11051303 | rs1025624  | 23 | 3 |
| 51857   | Affected | Male   | 12 | 31226070  | 31298174  | 72105 | rs11051303 | rs1025624  | 23 | 3 |
| 52492   | Affected | Male   | 12 | 31226070  | 31298174  | 72105 | rs11051303 | rs1025624  | 23 | 3 |
| 52499   | Affected | Male   | 12 | 31226070  | 31298174  | 72105 | rs11051303 | rs1025624  | 23 | 3 |
| 62895   | Affected | Female | 12 | 31226070  | 31298174  | 72105 | rs11051303 | rs1025624  | 23 | 3 |
| 62940   | Affected | Male   | 12 | 31226070  | 31298174  | 72105 | rs11051303 | rs1025624  | 23 | 3 |
| 970557  | Affected | Male   | 12 | 31226070  | 31298174  | 72105 | rs11051303 | rs1025624  | 23 | 3 |
| 51516   | Control  | Female | 12 | 31226070  | 31298174  | 72105 | rs11051303 | rs1025624  | 23 | 3 |
| 60838   | Control  | Male   | 12 | 31226070  | 31298174  | 72105 | rs11051303 | rs1025624  | 23 | 3 |
| 61054   | Control  | Female | 12 | 31226070  | 31298174  | 72105 | rs11051303 | rs1025624  | 23 | 3 |
| 61060   | Control  | Female | 12 | 31226070  | 31298174  | 72105 | rs11051303 | rs1025624  | 23 | 3 |
| 61238   | Control  | Male   | 12 | 31226070  | 31298174  | 72105 | rs11051303 | rs1025624  | 23 | 3 |
| 61447   | Control  | Male   | 12 | 31226070  | 31298174  | 72105 | rs11051303 | rs1025624  | 23 | 3 |
| 71214   | Control  | Female | 12 | 31226070  | 31298174  | 72105 | rs11051303 | rs1025624  | 23 | 3 |
| 970814  | Control  | Female | 12 | 31226070  | 31298174  | 72105 | rs11051303 | rs1025624  | 23 | 3 |
| 06D6314 | Control  | Male   | 12 | 31226070  | 31298174  | 72105 | rs11051303 | rs1025624  | 23 | 3 |
| con077  | Control  | Male   | 12 | 31226070  | 31298174  | 72105 | rs11051303 | rs1025624  | 23 | 3 |
| 11328   | Affected | Male   | 12 | 19396664  | 19469374  | 72711 | rs11044508 | rs2961365  | 16 | 3 |
| 70585   | Affected | Male   | 12 | 50994687  | 51068408  | 73722 | rs2857671  | rs949385   | 33 | 3 |
| 30929   | Control  | Male   | 12 | 31226070  | 31300846  | 74777 | rs11051303 | rs617372   | 24 | 3 |
| 50585   | Control  | Male   | 12 | 31226070  | 31300846  | 74777 | rs11051303 | rs617372   | 24 | 3 |
| 41877   | Affected | Male   | 12 | 122685936 | 122761809 | 75874 | rs11572920 | rs7399224  | 12 | 3 |
| 72577   | Affected | Male   | 12 | 7913199   | 7990569   | 77371 | rs10846078 | rs1473164  | 17 | 1 |
| con086  | Control  | Female | 12 | 127753095 | 127830791 | 77697 | rs7968958  | rs12299194 | 36 | 3 |
| 52450   | Affected | Male   | 12 | 21909431  | 21988568  | 79138 | rs697252   | rs1517272  | 14 | 1 |
| 52368   | Affected | Female | 12 | 130299179 | 130380887 | 81709 | rs12819042 | rs11608663 | 25 | 1 |
| 30835   | Affected | Male   | 12 | 130296270 | 130378451 | 82182 | rs4387437  | rs4759915  | 26 | 1 |
| 70552   | Affected | Male   | 12 | 130296270 | 130378451 | 82182 | rs4387437  | rs4759915  | 26 | 1 |

|        |          |        |    |           |           |       |            |            |    |   |
|--------|----------|--------|----|-----------|-----------|-------|------------|------------|----|---|
| 11252  | Affected | Female | 12 | 130296270 | 130380887 | 84618 | rs4387437  | rs11608663 | 27 | 1 |
| 11314  | Affected | Male   | 12 | 130296270 | 130380887 | 84618 | rs4387437  | rs11608663 | 27 | 1 |
| 20352  | Affected | Male   | 12 | 130296270 | 130380887 | 84618 | rs4387437  | rs11608663 | 27 | 1 |
| 20420  | Affected | Female | 12 | 130296270 | 130380887 | 84618 | rs4387437  | rs11608663 | 27 | 1 |
| 20497  | Affected | Female | 12 | 130296270 | 130380887 | 84618 | rs4387437  | rs11608663 | 27 | 1 |
| 20503  | Affected | Female | 12 | 130296270 | 130380887 | 84618 | rs4387437  | rs11608663 | 27 | 1 |
| 51652  | Affected | Male   | 12 | 130296270 | 130380887 | 84618 | rs4387437  | rs11608663 | 27 | 1 |
| 52396  | Affected | Male   | 12 | 130296270 | 130380887 | 84618 | rs4387437  | rs11608663 | 27 | 1 |
| 60343  | Affected | Male   | 12 | 130296270 | 130380887 | 84618 | rs4387437  | rs11608663 | 27 | 1 |
| 960361 | Affected | Male   | 12 | 130296270 | 130380887 | 84618 | rs4387437  | rs11608663 | 27 | 1 |
| 51223  | Control  | Male   | 12 | 130296270 | 130380887 | 84618 | rs4387437  | rs11608663 | 27 | 1 |
| 52555  | Control  | Male   | 12 | 130296270 | 130380887 | 84618 | rs4387437  | rs11608663 | 27 | 1 |
| 62662  | Control  | Female | 12 | 130296270 | 130380887 | 84618 | rs4387437  | rs11608663 | 27 | 1 |
| 2050   | Affected | Male   | 12 | 19384370  | 19469374  | 85005 | rs10770476 | rs2961365  | 18 | 3 |
| 20631  | Affected | Male   | 12 | 19384370  | 19469374  | 85005 | rs10770476 | rs2961365  | 18 | 3 |
| 30959  | Affected | Male   | 12 | 19384370  | 19469374  | 85005 | rs10770476 | rs2961365  | 18 | 3 |
| 52138  | Affected | Female | 12 | 19384370  | 19469374  | 85005 | rs10770476 | rs2961365  | 18 | 3 |
| 52527  | Affected | Male   | 12 | 19384370  | 19469374  | 85005 | rs10770476 | rs2961365  | 18 | 3 |
| 71456  | Affected | Female | 12 | 19384370  | 19469374  | 85005 | rs10770476 | rs2961365  | 18 | 3 |
| 51880  | Control  | Female | 12 | 19384370  | 19469374  | 85005 | rs10770476 | rs2961365  | 18 | 3 |
| 1679   | Affected | Male   | 12 | 50977370  | 51063780  | 86411 | rs949387   | rs2245203  | 43 | 3 |
| 50851  | Affected | Male   | 12 | 50977370  | 51063780  | 86411 | rs949387   | rs2245203  | 43 | 3 |
| 51133  | Control  | Male   | 12 | 50977370  | 51063780  | 86411 | rs949387   | rs2245203  | 43 | 3 |
| 62076  | Control  | Female | 12 | 50977370  | 51063780  | 86411 | rs949387   | rs2245203  | 43 | 3 |
| 20605  | Affected | Male   | 12 | 50978474  | 51068408  | 89935 | rs17706759 | rs949385   | 43 | 3 |
| 70518  | Control  | Male   | 12 | 50977370  | 51068408  | 91039 | rs949387   | rs949385   | 44 | 3 |
| 11323  | Affected | Male   | 12 | 7899399   | 7990569   | 91171 | rs2889504  | rs1473164  | 20 | 3 |
| 61818  | Affected | Male   | 12 | 7899399   | 7990569   | 91171 | rs2889504  | rs1473164  | 20 | 1 |
| 70746  | Affected | Male   | 12 | 7888157   | 7979494   | 91338 | rs11056079 | rs2244822  | 20 | 3 |
| 61911  | Control  | Male   | 12 | 80451775  | 80544068  | 92294 | rs7304553  | rs12826603 | 22 | 3 |
| 1477   | Affected | Male   | 12 | 130288474 | 130380887 | 92414 | rs10848321 | rs11608663 | 30 | 1 |
| 30793  | Affected | Male   | 12 | 19358223  | 19452810  | 94588 | rs7297169  | rs7304081  | 19 | 3 |

|         |          |        |    |           |           |        |            |            |     |   |
|---------|----------|--------|----|-----------|-----------|--------|------------|------------|-----|---|
| 52049   | Control  | Female | 12 | 31202342  | 31298174  | 95833  | rs7953222  | rs1025624  | 24  | 3 |
| 52501   | Control  | Male   | 12 | 31202342  | 31298174  | 95833  | rs7953222  | rs1025624  | 24  | 3 |
| 06D6179 | Control  | Male   | 12 | 53600613  | 53697983  | 97371  | rs11831847 | rs17116813 | 34  | 1 |
| 42018   | Affected | Male   | 12 | 7884583   | 7982106   | 97524  | rs2889545  | rs7309332  | 23  | 3 |
| 60816   | Affected | Male   | 12 | 7884583   | 7982106   | 97524  | rs2889545  | rs7309332  | 23  | 3 |
| 71268   | Affected | Female | 12 | 7884583   | 7982106   | 97524  | rs2889545  | rs7309332  | 23  | 3 |
| 62940   | Affected | Male   | 12 | 46232064  | 46330773  | 98710  | rs2214527  | rs1233057  | 22  | 3 |
| 61210   | Control  | Female | 12 | 16358963  | 16457819  | 98857  | rs10772921 | rs6488844  | 28  | 3 |
| 52617   | Affected | Female | 12 | 7891603   | 7990569   | 98967  | rs7965203  | rs1473164  | 22  | 1 |
| 61025   | Affected | Male   | 12 | 7891603   | 7990569   | 98967  | rs7965203  | rs1473164  | 22  | 1 |
| 61332   | Affected | Male   | 12 | 7891603   | 7990569   | 98967  | rs7965203  | rs1473164  | 22  | 1 |
| 30803   | Affected | Male   | 12 | 130281795 | 130380887 | 99093  | rs7295155  | rs11608663 | 33  | 1 |
| 61283   | Control  | Male   | 13 | 23138331  | 23310180  | 171850 | rs8001054  | rs17079410 | 42  | 3 |
| 06D6232 | Control  | Male   | 13 | 23381053  | 23830645  | 449593 | rs7337921  | rs17077827 | 206 | 3 |
| con052  | Control  | Female | 13 | 23802315  | 24108959  | 306645 | rs3979307  | rs17080865 | 49  | 1 |
| 62732   | Affected | Female | 13 | 30670353  | 31100333  | 429981 | rs9598993  | rs9603395  | 96  | 1 |
| 980012  | Control  | Female | 13 | 56690719  | 56930507  | 239789 | rs9563481  | rs1449571  | 30  | 1 |
| 62522   | Control  | Male   | 13 | 69262275  | 69681012  | 418738 | rs9572286  | rs2225216  | 104 | 1 |
| 20482   | Affected | Male   | 13 | 75319632  | 75516975  | 197344 | rs9530473  | rs9573726  | 74  | 3 |
| con023  | Control  | Female | 13 | 90843580  | 91097610  | 254031 | rs9523322  | rs16946366 | 65  | 1 |
| 40580   | Affected | Female | 13 | 90859879  | 91097610  | 237732 | rs9523330  | rs16946366 | 63  | 1 |
| 60886   | Affected | Male   | 13 | 90859879  | 91102975  | 243097 | rs9523330  | rs3852115  | 64  | 1 |
| 60705   | Control  | Male   | 13 | 92612027  | 92951673  | 339647 | rs319533   | rs7332793  | 91  | 3 |
| 51552   | Control  | Female | 13 | 106353066 | 106713791 | 360726 | rs9301169  | rs1819243  | 97  | 3 |
| 61649   | Control  | Female | 13 | 112241985 | 112406585 | 164601 | rs9550130  | rs282578   | 36  | 3 |
| 20532   | Affected | Male   | 13 | 24172526  | 24229027  | 56502  | rs3783061  | rs3803217  | 16  | 3 |
| 20056   | Affected | Male   | 13 | 41477528  | 41534943  | 57416  | rs17062708 | rs943390   | 18  | 3 |
| 50079   | Affected | Male   | 13 | 91035934  | 91097610  | 61677  | rs9523366  | rs16946366 | 20  | 1 |
| 970555  | Affected | Male   | 13 | 110480001 | 110542939 | 62939  | rs9522086  | rs958378   | 18  | 3 |
| 52144   | Control  | Male   | 13 | 110480001 | 110542939 | 62939  | rs9522086  | rs958378   | 18  | 3 |
| 61272   | Control  | Male   | 13 | 110483173 | 110547117 | 63945  | rs7991093  | rs7983441  | 18  | 3 |
| 60209   | Control  | Female | 13 | 106990121 | 107055221 | 65101  | rs2809285  | rs957788   | 22  | 1 |

|         |          |        |    |           |           |         |            |            |     |   |
|---------|----------|--------|----|-----------|-----------|---------|------------|------------|-----|---|
| 11087   | Affected | Male   | 13 | 110480001 | 110547117 | 67117   | rs9522086  | rs7983441  | 19  | 3 |
| 20064   | Affected | Male   | 13 | 110480001 | 110547117 | 67117   | rs9522086  | rs7983441  | 19  | 3 |
| 52546   | Affected | Male   | 13 | 110480001 | 110547117 | 67117   | rs9522086  | rs7983441  | 19  | 3 |
| 60955   | Control  | Male   | 13 | 110480001 | 110547117 | 67117   | rs9522086  | rs7983441  | 19  | 3 |
| 30721   | Control  | Male   | 13 | 94740493  | 94817355  | 76863   | rs7330673  | rs2389251  | 33  | 3 |
| 20618   | Affected | Male   | 13 | 27800008  | 27877480  | 77473   | rs3794400  | rs10507384 | 20  | 3 |
| 61619   | Control  | Male   | 13 | 91759152  | 91836914  | 77763   | rs7327328  | rs9301803  | 17  | 3 |
| 70590   | Affected | Male   | 13 | 107159560 | 107238344 | 78785   | rs9783586  | rs9555408  | 25  | 1 |
| 70282   | Control  | Male   | 13 | 99774563  | 99853489  | 78927   | rs16957301 | rs9557426  | 11  | 1 |
| con096  | Control  | Female | 13 | 19386212  | 19472373  | 86162   | rs1413477  | rs6490506  | 12  | 3 |
| 30808   | Control  | Male   | 13 | 110480001 | 110571109 | 91109   | rs9522086  | rs9555773  | 23  | 3 |
| 970543  | Control  | Female | 14 | 89070864  | 89729892  | 659029  | rs386276   | rs7155680  | 153 | 4 |
| 06D6347 | Control  | Female | 14 | 22230034  | 22334110  | 104077  | rs7140697  | rs8008860  | 33  | 3 |
| 70053   | Control  | Male   | 14 | 34023130  | 34289096  | 265967  | rs8011759  | rs2010608  | 46  | 3 |
| 62551   | Control  | Female | 14 | 43889940  | 44001343  | 111404  | rs10136083 | rs1953572  | 27  | 3 |
| 860     | Affected | Male   | 14 | 80469445  | 80601507  | 132063  | rs2195101  | rs11845164 | 37  | 1 |
| 2048    | Affected | Male   | 14 | 88246365  | 88535786  | 289422  | rs10135487 | rs763313   | 41  | 3 |
| 06D6297 | Control  | Male   | 14 | 103056893 | 103480058 | 423166  | rs2071407  | rs17101957 | 48  | 3 |
| 30661   | Affected | Male   | 14 | 71811439  | 71865114  | 53676   | rs10483843 | rs1996661  | 15  | 1 |
| 31077   | Affected | Female | 14 | 71811439  | 71865114  | 53676   | rs10483843 | rs1996661  | 15  | 1 |
| 50324   | Affected | Male   | 14 | 34425051  | 34489343  | 64293   | rs1400745  | rs1568200  | 12  | 3 |
| 51058   | Affected | Female | 15 | 25468061  | 26017833  | 549773  | rs11858785 | rs7495174  | 152 | 3 |
| 1880    | Affected | Male   | 15 | 28723577  | 30302218  | 1578642 | rs2046362  | rs4779984  | 287 | 1 |
| 61525   | Affected | Female | 15 | 28723577  | 30302218  | 1578642 | rs2046362  | rs4779984  | 287 | 1 |
| 20400   | Affected | Male   | 15 | 28723577  | 30302218  | 1578642 | rs2046362  | rs4779984  | 287 | 1 |
| con012  | Control  | Male   | 15 | 30713368  | 33237841  | 2524474 | rs11632524 | rs11854468 | 872 | 1 |
| 51858   | Affected | Male   | 15 | 51420702  | 52517515  | 1096814 | rs272789   | rs2414315  | 338 | 1 |
| 61910   | Control  | Female | 15 | 20306549  | 20778963  | 472415  | rs8040193  | rs1976210  | 116 | 1 |
| 70208   | Affected | Male   | 15 | 20306549  | 20778963  | 472415  | rs8040193  | rs1976210  | 116 | 1 |
| 62594   | Control  | Male   | 15 | 20306549  | 20778963  | 472415  | rs8040193  | rs1976210  | 116 | 1 |
| 62308   | Control  | Male   | 15 | 20306549  | 20778963  | 472415  | rs8040193  | rs1976210  | 116 | 1 |
| 960149  | Affected | Female | 15 | 20306549  | 20778963  | 472415  | rs8040193  | rs1976210  | 116 | 1 |

|         |          |        |    |          |          |        |            |            |     |   |
|---------|----------|--------|----|----------|----------|--------|------------|------------|-----|---|
| 61659   | Affected | Male   | 15 | 20306549 | 20778963 | 472415 | rs8040193  | rs1976210  | 116 | 1 |
| 31119   | Affected | Male   | 15 | 20306549 | 20778963 | 472415 | rs8040193  | rs1976210  | 116 | 1 |
| 61921   | Affected | Male   | 15 | 20306549 | 20778963 | 472415 | rs8040193  | rs1976210  | 116 | 3 |
| 60924   | Control  | Female | 15 | 20306549 | 20778963 | 472415 | rs8040193  | rs1976210  | 116 | 3 |
| 30841   | Affected | Male   | 15 | 20306549 | 20778963 | 472415 | rs8040193  | rs1976210  | 116 | 3 |
| 20400   | Affected | Male   | 15 | 20306549 | 20778963 | 472415 | rs8040193  | rs1976210  | 116 | 3 |
| 11318   | Affected | Male   | 15 | 20306549 | 20778963 | 472415 | rs8040193  | rs1976210  | 116 | 3 |
| 60360   | Affected | Male   | 15 | 20306549 | 20778963 | 472415 | rs8040193  | rs1976210  | 116 | 3 |
| 60372   | Control  | Female | 15 | 20330244 | 20778963 | 448720 | rs6606788  | rs1976210  | 111 | 3 |
| 61691   | Control  | Male   | 15 | 20335459 | 20778963 | 443505 | rs12900257 | rs1976210  | 109 | 3 |
| con093  | Control  | Male   | 15 | 20342795 | 20778963 | 436169 | rs6606792  | rs1976210  | 107 | 3 |
| 61138   | Affected | Female | 15 | 20342795 | 20778963 | 436169 | rs6606792  | rs1976210  | 107 | 3 |
| 50585   | Control  | Male   | 15 | 21905523 | 22036253 | 130731 | rs8032590  | rs2007159  | 16  | 1 |
| 61470   | Affected | Male   | 15 | 21905523 | 22036253 | 130731 | rs8032590  | rs2007159  | 16  | 1 |
| 51769   | Affected | Male   | 15 | 21905523 | 22036253 | 130731 | rs8032590  | rs2007159  | 16  | 1 |
| 971     | Affected | Female | 15 | 21905523 | 22036253 | 130731 | rs8032590  | rs2007159  | 16  | 1 |
| 61748   | Affected | Male   | 15 | 21905523 | 22036253 | 130731 | rs8032590  | rs2007159  | 16  | 1 |
| 62505   | Affected | Male   | 15 | 21905523 | 22036253 | 130731 | rs8032590  | rs2007159  | 16  | 1 |
| 20420   | Affected | Female | 15 | 21905523 | 22036253 | 130731 | rs8032590  | rs2007159  | 16  | 1 |
| 06D6179 | Control  | Male   | 15 | 21905523 | 22083695 | 178173 | rs8032590  | rs1532517  | 18  | 1 |
| 61332   | Affected | Male   | 15 | 21905523 | 22083695 | 178173 | rs8032590  | rs1532517  | 18  | 1 |
| 06D6472 | Control  | Female | 15 | 21905523 | 22083695 | 178173 | rs8032590  | rs1532517  | 18  | 1 |
| 993     | Affected | Male   | 15 | 21920736 | 22036253 | 115518 | rs1110961  | rs2007159  | 15  | 1 |
| 10997   | Affected | Male   | 15 | 21920736 | 22036253 | 115518 | rs1110961  | rs2007159  | 15  | 3 |
| 50422   | Affected | Male   | 15 | 25818619 | 25950357 | 131739 | rs2871886  | rs13329466 | 36  | 3 |
| 70862   | Control  | Male   | 15 | 29807358 | 30231488 | 424131 | rs10459624 | rs2337980  | 83  | 3 |
| 30770   | Control  | Male   | 15 | 29807358 | 30302218 | 494861 | rs10459624 | rs4779984  | 89  | 3 |
| 70651   | Control  | Male   | 15 | 32145617 | 32300108 | 154492 | rs541098   | rs7169884  | 22  | 1 |
| 51438   | Affected | Male   | 15 | 32505886 | 32769676 | 263791 | rs3894644  | rs8026592  | 52  | 1 |
| 970679  | Control  | Female | 15 | 32575858 | 32779408 | 203551 | rs3812940  | rs4924132  | 50  | 1 |
| 70669   | Control  | Female | 15 | 42882488 | 42992246 | 109759 | rs10152725 | rs4082812  | 13  | 1 |
| 62567   | Control  | Male   | 15 | 48767030 | 48987325 | 220296 | rs8027597  | rs2249535  | 31  | 3 |

|         |          |        |    |          |          |        |            |            |     |   |
|---------|----------|--------|----|----------|----------|--------|------------|------------|-----|---|
| 61752   | Control  | Male   | 15 | 52559172 | 52761719 | 202548 | rs4641682  | rs6493701  | 46  | 1 |
| 30624   | Affected | Male   | 15 | 55431559 | 55544803 | 113245 | rs935322   | rs1995989  | 67  | 3 |
| 06D6906 | Control  | Female | 15 | 55431559 | 55544803 | 113245 | rs935322   | rs1995989  | 67  | 3 |
| 51769   | Affected | Male   | 15 | 55431559 | 55563118 | 131560 | rs935322   | rs12148280 | 79  | 3 |
| 52192   | Control  | Male   | 15 | 55431559 | 55563118 | 131560 | rs935322   | rs12148280 | 79  | 3 |
| 51911   | Affected | Male   | 15 | 57055702 | 57182476 | 126775 | rs2899637  | rs10851643 | 17  | 1 |
| 1826    | Affected | Male   | 15 | 75697257 | 76189313 | 492057 | rs907396   | rs3784327  | 84  | 3 |
| 60946   | Control  | Male   | 15 | 83626571 | 83886780 | 260210 | rs6496932  | rs2169876  | 50  | 3 |
| 70251   | Control  | Female | 15 | 84206708 | 84486939 | 280232 | rs1986595  | rs4887198  | 61  | 3 |
| 51450   | Control  | Male   | 15 | 88650522 | 88753236 | 102715 | rs6496649  | rs2589948  | 27  | 3 |
| 71322   | Control  | Female | 15 | 96539696 | 96960825 | 421130 | rs1552050  | rs6598534  | 142 | 3 |
| 52497   | Control  | Female | 15 | 98197646 | 98316888 | 119243 | rs11635811 | rs745104   | 24  | 1 |
| 30856   | Control  | Male   | 15 | 98202923 | 98310312 | 107390 | rs11855477 | rs1347478  | 22  | 1 |
| 60099   | Affected | Female | 15 | 98202923 | 98316888 | 113966 | rs11855477 | rs745104   | 23  | 1 |
| 60714   | Control  | Female | 15 | 98521675 | 98711322 | 189648 | rs12437498 | rs13380040 | 81  | 1 |
| 61241   | Control  | Male   | 15 | 99852790 | 99964634 | 111845 | rs2047222  | rs4965905  | 53  | 3 |
| 41727   | Affected | Male   | 15 | 97299355 | 97357475 | 58121  | rs2684799  | rs7177074  | 30  | 3 |
| 61619   | Control  | Male   | 15 | 32658588 | 32719522 | 60935  | rs2879515  | rs1836973  | 19  | 1 |
| 52044   | Affected | Male   | 15 | 97298194 | 97367760 | 69567  | rs11635251 | rs2654976  | 32  | 3 |
| 61170   | Affected | Male   | 15 | 58332482 | 58409103 | 76622  | rs16942348 | rs8033985  | 25  | 1 |
| 11375   | Affected | Male   | 15 | 32505886 | 32587887 | 82002  | rs3894644  | rs4924714  | 11  | 4 |
| 40006   | Affected | Male   | 15 | 32505886 | 32587887 | 82002  | rs3894644  | rs4924714  | 11  | 4 |
| 1086    | Affected | Female | 15 | 32505886 | 32587887 | 82002  | rs3894644  | rs4924714  | 11  | 1 |
| 1109    | Affected | Male   | 15 | 32505886 | 32587887 | 82002  | rs3894644  | rs4924714  | 11  | 1 |
| 1110    | Affected | Male   | 15 | 32505886 | 32587887 | 82002  | rs3894644  | rs4924714  | 11  | 1 |
| 1826    | Affected | Male   | 15 | 32505886 | 32587887 | 82002  | rs3894644  | rs4924714  | 11  | 1 |
| 11188   | Affected | Male   | 15 | 32505886 | 32587887 | 82002  | rs3894644  | rs4924714  | 11  | 1 |
| 11290   | Affected | Female | 15 | 32505886 | 32587887 | 82002  | rs3894644  | rs4924714  | 11  | 1 |
| 20231   | Affected | Male   | 15 | 32505886 | 32587887 | 82002  | rs3894644  | rs4924714  | 11  | 1 |
| 20420   | Affected | Female | 15 | 32505886 | 32587887 | 82002  | rs3894644  | rs4924714  | 11  | 1 |
| 20459   | Affected | Female | 15 | 32505886 | 32587887 | 82002  | rs3894644  | rs4924714  | 11  | 1 |
| 20496   | Affected | Male   | 15 | 32505886 | 32587887 | 82002  | rs3894644  | rs4924714  | 11  | 1 |

|        |          |        |    |          |          |       |           |           |    |   |
|--------|----------|--------|----|----------|----------|-------|-----------|-----------|----|---|
| 20604  | Affected | Female | 15 | 32505886 | 32587887 | 82002 | rs3894644 | rs4924714 | 11 | 1 |
| 20650  | Affected | Male   | 15 | 32505886 | 32587887 | 82002 | rs3894644 | rs4924714 | 11 | 1 |
| 20688  | Affected | Male   | 15 | 32505886 | 32587887 | 82002 | rs3894644 | rs4924714 | 11 | 1 |
| 30814  | Affected | Male   | 15 | 32505886 | 32587887 | 82002 | rs3894644 | rs4924714 | 11 | 1 |
| 40133  | Affected | Male   | 15 | 32505886 | 32587887 | 82002 | rs3894644 | rs4924714 | 11 | 1 |
| 40207  | Affected | Male   | 15 | 32505886 | 32587887 | 82002 | rs3894644 | rs4924714 | 11 | 1 |
| 40580  | Affected | Female | 15 | 32505886 | 32587887 | 82002 | rs3894644 | rs4924714 | 11 | 1 |
| 50334  | Affected | Male   | 15 | 32505886 | 32587887 | 82002 | rs3894644 | rs4924714 | 11 | 1 |
| 50638  | Affected | Male   | 15 | 32505886 | 32587887 | 82002 | rs3894644 | rs4924714 | 11 | 1 |
| 50852  | Affected | Male   | 15 | 32505886 | 32587887 | 82002 | rs3894644 | rs4924714 | 11 | 1 |
| 51276  | Affected | Female | 15 | 32505886 | 32587887 | 82002 | rs3894644 | rs4924714 | 11 | 1 |
| 51465  | Affected | Female | 15 | 32505886 | 32587887 | 82002 | rs3894644 | rs4924714 | 11 | 1 |
| 51603  | Affected | Male   | 15 | 32505886 | 32587887 | 82002 | rs3894644 | rs4924714 | 11 | 1 |
| 60666  | Affected | Male   | 15 | 32505886 | 32587887 | 82002 | rs3894644 | rs4924714 | 11 | 1 |
| 61004  | Affected | Male   | 15 | 32505886 | 32587887 | 82002 | rs3894644 | rs4924714 | 11 | 1 |
| 61070  | Affected | Male   | 15 | 32505886 | 32587887 | 82002 | rs3894644 | rs4924714 | 11 | 1 |
| 61357  | Affected | Male   | 15 | 32505886 | 32587887 | 82002 | rs3894644 | rs4924714 | 11 | 1 |
| 61389  | Affected | Male   | 15 | 32505886 | 32587887 | 82002 | rs3894644 | rs4924714 | 11 | 1 |
| 61748  | Affected | Male   | 15 | 32505886 | 32587887 | 82002 | rs3894644 | rs4924714 | 11 | 1 |
| 61753  | Affected | Male   | 15 | 32505886 | 32587887 | 82002 | rs3894644 | rs4924714 | 11 | 1 |
| 61754  | Affected | Male   | 15 | 32505886 | 32587887 | 82002 | rs3894644 | rs4924714 | 11 | 1 |
| 62340  | Affected | Male   | 15 | 32505886 | 32587887 | 82002 | rs3894644 | rs4924714 | 11 | 1 |
| 62548  | Affected | Female | 15 | 32505886 | 32587887 | 82002 | rs3894644 | rs4924714 | 11 | 1 |
| 62940  | Affected | Male   | 15 | 32505886 | 32587887 | 82002 | rs3894644 | rs4924714 | 11 | 1 |
| 70357  | Affected | Male   | 15 | 32505886 | 32587887 | 82002 | rs3894644 | rs4924714 | 11 | 1 |
| 20153  | Affected | Female | 15 | 32505886 | 32587887 | 82002 | rs3894644 | rs4924714 | 11 | 0 |
| 20425  | Affected | Female | 15 | 32505886 | 32587887 | 82002 | rs3894644 | rs4924714 | 11 | 0 |
| 70105  | Affected | Male   | 15 | 32505886 | 32587887 | 82002 | rs3894644 | rs4924714 | 11 | 0 |
| 960101 | Affected | Male   | 15 | 32505886 | 32587887 | 82002 | rs3894644 | rs4924714 | 11 | 0 |
| 52172  | Control  | Female | 15 | 32505886 | 32587887 | 82002 | rs3894644 | rs4924714 | 11 | 1 |
| 52262  | Control  | Male   | 15 | 32505886 | 32587887 | 82002 | rs3894644 | rs4924714 | 11 | 1 |
| 52286  | Control  | Male   | 15 | 32505886 | 32587887 | 82002 | rs3894644 | rs4924714 | 11 | 1 |



|         |          |        |    |          |           |         |            |            |     |   |
|---------|----------|--------|----|----------|-----------|---------|------------|------------|-----|---|
| 52555   | Control  | Male   | 15 | 32505886 | 32587887  | 82002   | rs3894644  | rs4924714  | 11  | 1 |
| 60039   | Control  | Male   | 15 | 32505886 | 32587887  | 82002   | rs3894644  | rs4924714  | 11  | 1 |
| 60484   | Control  | Female | 15 | 32505886 | 32587887  | 82002   | rs3894644  | rs4924714  | 11  | 1 |
| 60781   | Control  | Male   | 15 | 32505886 | 32587887  | 82002   | rs3894644  | rs4924714  | 11  | 1 |
| 61013   | Control  | Male   | 15 | 32505886 | 32587887  | 82002   | rs3894644  | rs4924714  | 11  | 1 |
| 61275   | Control  | Male   | 15 | 32505886 | 32587887  | 82002   | rs3894644  | rs4924714  | 11  | 1 |
| 62566   | Control  | Male   | 15 | 32505886 | 32587887  | 82002   | rs3894644  | rs4924714  | 11  | 1 |
| 62567   | Control  | Male   | 15 | 32505886 | 32587887  | 82002   | rs3894644  | rs4924714  | 11  | 1 |
| 62897   | Control  | Female | 15 | 32505886 | 32587887  | 82002   | rs3894644  | rs4924714  | 11  | 1 |
| 970786  | Control  | Male   | 15 | 32505886 | 32587887  | 82002   | rs3894644  | rs4924714  | 11  | 0 |
| 06D6852 | Control  | Female | 15 | 32505886 | 32587887  | 82002   | rs3894644  | rs4924714  | 11  | 0 |
| 06D7022 | Control  | Male   | 15 | 32505886 | 32587887  | 82002   | rs3894644  | rs4924714  | 11  | 0 |
| 970166  | Affected | Male   | 15 | 99975177 | 100066701 | 91525   | rs7168948  | rs8038125  | 12  | 3 |
| 72543   | Control  | Male   | 15 | 20330244 | 20425225  | 94982   | rs6606788  | rs548      | 26  | 1 |
| 06D6921 | Control  | Female | 15 | 55441044 | 55538982  | 97939   | rs4553565  | rs10048047 | 49  | 3 |
| 71493   | Affected | Male   | 16 | 15032942 | 16197033  | 1164092 | rs4985124  | rs8056397  | 201 | 3 |
| 980503  | Affected | Male   | 16 | 15032942 | 16197033  | 1164092 | rs4985124  | rs8056397  | 201 | 3 |
| 50218   | Affected | Male   | 16 | 15032942 | 16197033  | 1164092 | rs4985124  | rs8056397  | 201 | 3 |
| 30891   | Control  | Male   | 16 | 15032942 | 16197033  | 1164092 | rs4985124  | rs8056397  | 201 | 3 |
| 30929   | Control  | Male   | 16 | 15192528 | 15829459  | 636932  | rs11075260 | rs216166   | 82  | 3 |
| 61415   | Control  | Female | 16 | 15192528 | 16197033  | 1004506 | rs11075260 | rs8056397  | 190 | 3 |
| 30929   | Control  | Male   | 16 | 16880637 | 18072544  | 1191908 | rs4496122  | rs9284326  | 285 | 3 |
| 51452   | Control  | Male   | 16 | 80739605 | 82222770  | 1483166 | rs1056629  | rs12449206 | 822 | 3 |
| 71252   | Affected | Female | 16 | 80739605 | 82222770  | 1483166 | rs1056629  | rs12449206 | 822 | 3 |
| 51588   | Affected | Male   | 16 | 80759119 | 82222770  | 1463652 | rs7205534  | rs12449206 | 811 | 3 |
| 11082   | Affected | Female | 16 | 6573081  | 6681580   | 108500  | rs8044704  | rs7204582  | 73  | 1 |
| 62891   | Control  | Male   | 16 | 6795938  | 6928412   | 132475  | rs6500840  | rs11077116 | 68  | 3 |
| 20227   | Affected | Male   | 16 | 6972054  | 7132653   | 160600  | rs4287581  | rs12445853 | 74  | 1 |
| 51961   | Control  | Female | 16 | 7619581  | 8116843   | 497263  | rs3785228  | rs8050359  | 190 | 3 |
| 970560  | Control  | Male   | 16 | 8797034  | 8956611   | 159578  | rs1864     | rs10500366 | 39  | 3 |
| 60972   | Affected | Male   | 16 | 8803595  | 8947820   | 144226  | rs2304469  | rs2248797  | 31  | 3 |
| 31115   | Affected | Male   | 16 | 15420076 | 15561832  | 141757  | rs3844608  | rs9923708  | 18  | 3 |

|         |          |        |    |          |          |        |            |            |     |   |
|---------|----------|--------|----|----------|----------|--------|------------|------------|-----|---|
| 30929   | Control  | Male   | 16 | 16002946 | 16197033 | 194088 | rs4780585  | rs8056397  | 72  | 3 |
| con093  | Control  | Male   | 16 | 16767302 | 17091142 | 323841 | rs11649230 | rs4533273  | 73  | 3 |
| 31067   | Affected | Male   | 16 | 21482719 | 21647775 | 165057 | rs13339281 | rs8050407  | 19  | 1 |
| 62881   | Affected | Male   | 16 | 21482719 | 21647775 | 165057 | rs13339281 | rs8050407  | 19  | 3 |
| 72730   | Affected | Male   | 16 | 21856623 | 22163399 | 306777 | rs2945466  | rs2303188  | 32  | 3 |
| 20604   | Affected | Female | 16 | 21922143 | 22331199 | 409057 | rs4281695  | rs12446433 | 43  | 3 |
| 70372   | Affected | Male   | 16 | 22581356 | 22685278 | 103923 | rs2887622  | rs209462   | 20  | 3 |
| 61649   | Control  | Female | 16 | 22581356 | 22685278 | 103923 | rs2887622  | rs209462   | 20  | 3 |
| 11375   | Affected | Male   | 16 | 74798976 | 75087696 | 288721 | rs2194295  | rs17767530 | 78  | 1 |
| 06D6268 | Control  | Female | 16 | 75830083 | 75976742 | 146660 | rs4887899  | rs2454935  | 65  | 1 |
| 50638   | Affected | Male   | 16 | 75883998 | 75988077 | 104080 | rs9932232  | rs17620846 | 56  | 1 |
| 61542   | Affected | Male   | 16 | 76180501 | 76535568 | 355068 | rs12925765 | rs7189161  | 198 | 3 |
| 06D6321 | Control  | Female | 16 | 76943796 | 77083313 | 139518 | rs4624193  | rs12716855 | 39  | 1 |
| con057  | Control  | Male   | 16 | 82398662 | 82502789 | 104128 | rs41103    | rs12598185 | 47  | 1 |
| 61389   | Affected | Male   | 16 | 83663144 | 83786163 | 123020 | rs12597135 | rs7200824  | 41  | 3 |
| 20603   | Affected | Male   | 16 | 86225098 | 86592857 | 367760 | rs16943093 | rs4843294  | 87  | 3 |
| 70631   | Affected | Female | 16 | 88171502 | 88317399 | 145898 | rs455527   | rs6500437  | 18  | 3 |
| 30889   | Control  | Female | 16 | 76578045 | 76629008 | 50964  | rs7192427  | rs4309408  | 23  | 1 |
| 62859   | Control  | Female | 16 | 76578045 | 76629008 | 50964  | rs7192427  | rs4309408  | 23  | 1 |
| 10594   | Affected | Female | 16 | 76619660 | 76674781 | 55122  | rs2075738  | rs7184271  | 23  | 1 |
| 50160   | Affected | Male   | 16 | 6810629  | 6869537  | 58909  | rs12919350 | rs2172308  | 31  | 1 |
| 60955   | Control  | Male   | 16 | 76860767 | 76922628 | 61862  | rs4508428  | rs3924959  | 24  | 1 |
| 61205   | Control  | Female | 16 | 76860767 | 76922628 | 61862  | rs4508428  | rs3924959  | 24  | 1 |
| 60805   | Control  | Female | 16 | 7073249  | 7136047  | 62799  | rs1478713  | rs899308   | 45  | 3 |
| 62443   | Control  | Female | 16 | 29554843 | 29618844 | 64002  | rs9926100  | rs7195050  | 14  | 3 |
| con017  | Control  | Male   | 16 | 76860767 | 76925315 | 64549  | rs4508428  | rs8052110  | 25  | 1 |
| 60946   | Control  | Male   | 16 | 4120912  | 4185910  | 64999  | rs917011   | rs11865087 | 18  | 1 |
| 70368   | Affected | Male   | 16 | 75813236 | 75879447 | 66212  | rs13338146 | rs4887902  | 23  | 1 |
| 61746   | Affected | Male   | 16 | 82613399 | 82683859 | 70461  | rs2875853  | rs11149625 | 34  | 3 |
| 20474   | Affected | Male   | 16 | 81513721 | 81602166 | 88446  | rs12102479 | rs12925746 | 49  | 1 |
| 62236   | Control  | Male   | 16 | 79761582 | 79852394 | 90813  | rs12934430 | rs6564863  | 30  | 3 |
| 71453   | Control  | Female | 16 | 6237353  | 6331875  | 94523  | rs13331533 | rs1640881  | 44  | 1 |

|         |          |        |    |          |          |         |            |            |     |   |
|---------|----------|--------|----|----------|----------|---------|------------|------------|-----|---|
| 62376   | Affected | Male   | 17 | 31889664 | 33323543 | 1433880 | rs8067765  | rs306801   | 268 | 1 |
| 62835   | Affected | Male   | 17 | 69345596 | 70135450 | 789855  | rs1585804  | rs491192   | 219 | 3 |
| 20616   | Affected | Male   | 17 | 69345596 | 70164827 | 819232  | rs1585804  | rs8081794  | 231 | 3 |
| 62426   | Affected | Female | 17 | 69346926 | 70160715 | 813790  | rs12948360 | rs513805   | 227 | 3 |
| 11305   | Affected | Male   | 17 | 70869854 | 71746800 | 876947  | rs9899687  | rs9903178  | 123 | 3 |
| 60363   | Control  | Female | 17 | 51088    | 163278   | 112191  | rs4890183  | rs4073769  | 36  | 3 |
| 30724   | Control  | Male   | 17 | 73263    | 399648   | 326386  | rs8078223  | rs3744734  | 65  | 3 |
| 1984    | Affected | Female | 17 | 1151041  | 1337249  | 186209  | rs4790823  | rs2358973  | 42  | 3 |
| 61919   | Control  | Female | 17 | 6699238  | 6801331  | 102094  | rs4510074  | rs17732181 | 19  | 1 |
| 20498   | Affected | Male   | 17 | 6699238  | 6801331  | 102094  | rs4510074  | rs17732181 | 19  | 1 |
| 52338   | Affected | Male   | 17 | 21628545 | 21755434 | 126890  | rs1478999  | rs6565378  | 14  | 1 |
| 50083   | Affected | Male   | 17 | 21628545 | 21755434 | 126890  | rs1478999  | rs6565378  | 14  | 1 |
| 70515   | Affected | Male   | 17 | 21628545 | 21755434 | 126890  | rs1478999  | rs6565378  | 14  | 3 |
| 20480   | Affected | Male   | 17 | 30154039 | 30312476 | 158438  | rs1860199  | rs9635769  | 25  | 1 |
| 51379   | Affected | Male   | 17 | 31309506 | 31413531 | 104026  | rs4796143  | rs1467288  | 24  | 3 |
| 11294   | Affected | Male   | 17 | 3451964  | 3502173  | 50210   | rs222738   | rs4790530  | 18  | 1 |
| 60805   | Control  | Female | 17 | 3451964  | 3502173  | 50210   | rs222738   | rs4790530  | 18  | 1 |
| 06D6215 | Control  | Male   | 17 | 3451964  | 3502173  | 50210   | rs222738   | rs4790530  | 18  | 1 |
| 60924   | Control  | Female | 17 | 33243095 | 33297438 | 54344   | rs4794762  | rs10512474 | 19  | 1 |
| 50943   | Control  | Female | 17 | 9242675  | 9298196  | 55522   | rs2314640  | rs12946817 | 21  | 1 |
| 960200  | Affected | Male   | 17 | 45332410 | 45389028 | 56619   | rs271672   | rs6504627  | 15  | 3 |
| 70038   | Affected | Male   | 17 | 76493532 | 76559732 | 66201   | rs9898178  | rs7502124  | 25  | 3 |
| 61480   | Control  | Male   | 17 | 4257388  | 4324728  | 67341   | rs7207359  | rs4790198  | 29  | 3 |
| 20618   | Affected | Male   | 17 | 76493532 | 76570569 | 77038   | rs9898178  | rs7219486  | 28  | 3 |
| 62019   | Control  | Female | 17 | 30708148 | 30787791 | 79644   | rs7211677  | rs2376263  | 19  | 1 |
| 11336   | Affected | Female | 17 | 76490264 | 76570569 | 80306   | rs2280146  | rs7219486  | 29  | 3 |
| 52572   | Affected | Male   | 17 | 33243095 | 33323543 | 80449   | rs4794762  | rs306801   | 22  | 3 |
| 50331   | Affected | Male   | 17 | 30708148 | 30792312 | 84165   | rs7211677  | rs1822403  | 20  | 1 |
| 06D6906 | Control  | Female | 17 | 30708148 | 30792312 | 84165   | rs7211677  | rs1822403  | 20  | 1 |
| 50639   | Affected | Male   | 17 | 53939204 | 54029904 | 90701   | rs2302189  | rs7209650  | 12  | 3 |
| 61202   | Affected | Male   | 18 | 2611407  | 2712914  | 101508  | rs7239383  | rs12608077 | 21  | 3 |
| 20643   | Affected | Male   | 18 | 3104980  | 3309915  | 204936  | rs8091028  | rs1662813  | 52  | 3 |

|         |          |        |    |          |          |        |            |            |     |   |
|---------|----------|--------|----|----------|----------|--------|------------|------------|-----|---|
| 20643   | Affected | Male   | 18 | 6296121  | 6616549  | 320429 | rs1946753  | rs1941508  | 94  | 3 |
| con004  | Control  | Female | 18 | 9533988  | 9662334  | 128347 | rs328994   | rs650464   | 31  | 1 |
| 61238   | Control  | Male   | 18 | 35200784 | 35304682 | 103899 | rs2066945  | rs1681045  | 16  | 1 |
| 71183   | Control  | Female | 18 | 62964964 | 63363992 | 399029 | rs7228283  | rs12961019 | 106 | 3 |
| con092  | Control  | Female | 18 | 63208880 | 63596654 | 387775 | rs7505354  | rs8083791  | 97  | 1 |
| 06D6442 | Control  | Female | 18 | 64795910 | 64897188 | 101279 | rs593385   | rs11875083 | 43  | 1 |
| 06D6715 | Control  | Male   | 18 | 70233924 | 70294366 | 60443  | rs10445535 | rs9319907  | 25  | 3 |
| 72480   | Affected | Female | 18 | 68477784 | 68538432 | 60649  | rs7244045  | rs10871704 | 21  | 3 |
| 51681   | Affected | Female | 18 | 27223042 | 27305675 | 82634  | rs9946169  | rs8091481  | 18  | 3 |
| 960434  | Affected | Female | 18 | 27223042 | 27305675 | 82634  | rs9946169  | rs8091481  | 18  | 3 |
| 20349   | Affected | Male   | 18 | 37655531 | 37745871 | 90341  | rs7240984  | rs9948753  | 24  | 1 |
| 52292   | Affected | Female | 19 | 6846866  | 7056136  | 209271 | rs330876   | rs2967657  | 54  | 3 |
| 52572   | Affected | Male   | 19 | 6852891  | 7056136  | 203246 | rs897738   | rs2967657  | 53  | 3 |
| 06D6738 | Control  | Female | 19 | 6852891  | 7056136  | 203246 | rs897738   | rs2967657  | 53  | 3 |
| 61355   | Affected | Male   | 19 | 6852891  | 7056136  | 203246 | rs897738   | rs2967657  | 53  | 3 |
| 73052   | Control  | Male   | 19 | 11565605 | 11991477 | 425873 | rs12972855 | rs157185   | 54  | 1 |
| 50503   | Affected | Male   | 19 | 20385941 | 20523385 | 137445 | rs918442   | rs10413625 | 14  | 1 |
| 06D6974 | Control  | Female | 19 | 20625937 | 20774467 | 148531 | rs274815   | rs396748   | 19  | 3 |
| 31009   | Control  | Male   | 19 | 20625937 | 20779390 | 153454 | rs274815   | rs393723   | 20  | 3 |
| 71064   | Affected | Male   | 19 | 20625937 | 20779390 | 153454 | rs274815   | rs393723   | 20  | 3 |
| 52343   | Control  | Male   | 19 | 20635716 | 20844764 | 209049 | rs612578   | rs1465430  | 25  | 1 |
| 1653    | Affected | Female | 19 | 42023454 | 42429690 | 406237 | rs1144539  | rs320881   | 42  | 1 |
| 62602   | Affected | Male   | 19 | 48231029 | 48387680 | 156652 | rs10418982 | rs4803586  | 16  | 1 |
| 62169   | Control  | Male   | 19 | 48231029 | 48387680 | 156652 | rs10418982 | rs4803586  | 16  | 3 |
| 10078   | Affected | Male   | 19 | 48253562 | 48387680 | 134119 | rs7260189  | rs4803586  | 15  | 3 |
| 10594   | Affected | Female | 19 | 48253562 | 48387680 | 134119 | rs7260189  | rs4803586  | 15  | 3 |
| 61544   | Control  | Male   | 19 | 48267714 | 48387680 | 119967 | rs3746096  | rs4803586  | 14  | 3 |
| 20634   | Affected | Male   | 19 | 56979264 | 57299577 | 320314 | rs7260516  | rs10411428 | 79  | 3 |
| 70200   | Control  | Male   | 19 | 56979264 | 57310877 | 331614 | rs7260516  | rs3764537  | 80  | 3 |
| 30921   | Affected | Male   | 19 | 56979264 | 57310877 | 331614 | rs7260516  | rs3764537  | 80  | 3 |
| 51644   | Affected | Female | 19 | 59423491 | 59536249 | 112759 | rs17207328 | rs1205322  | 32  | 3 |
| 20350   | Affected | Male   | 19 | 63118421 | 63270390 | 151970 | rs12981037 | rs2229375  | 27  | 3 |

|         |          |        |    |          |          |        |            |            |     |   |
|---------|----------|--------|----|----------|----------|--------|------------|------------|-----|---|
| 60360   | Affected | Male   | 19 | 12047761 | 12102245 | 54485  | rs7259845  | rs1980136  | 10  | 1 |
| 60678   | Control  | Male   | 19 | 38023753 | 38087253 | 63501  | rs929816   | rs4805015  | 19  | 1 |
| 52036   | Control  | Male   | 19 | 48321413 | 48387680 | 66268  | rs2354285  | rs4803586  | 12  | 3 |
| 11294   | Affected | Male   | 19 | 58567920 | 58640198 | 72279  | rs12978545 | rs11670677 | 23  | 1 |
| 62308   | Control  | Male   | 19 | 58567920 | 58640198 | 72279  | rs12978545 | rs11670677 | 23  | 1 |
| 20231   | Affected | Male   | 19 | 608666   | 681297   | 72632  | rs3787004  | rs1009690  | 14  | 1 |
| 2030    | Affected | Male   | 19 | 58624107 | 58697120 | 73014  | rs12977919 | rs10410999 | 24  | 1 |
| 31119   | Affected | Male   | 19 | 58624107 | 58697120 | 73014  | rs12977919 | rs10410999 | 24  | 1 |
| 52492   | Affected | Male   | 19 | 58624107 | 58697120 | 73014  | rs12977919 | rs10410999 | 24  | 1 |
| 61723   | Affected | Female | 19 | 58624107 | 58697120 | 73014  | rs12977919 | rs10410999 | 24  | 1 |
| 51371   | Affected | Male   | 19 | 53731699 | 53808916 | 77218  | rs16982133 | rs433852   | 25  | 3 |
| 61691   | Control  | Male   | 19 | 53731699 | 53808916 | 77218  | rs16982133 | rs433852   | 25  | 3 |
| 62511   | Affected | Male   | 19 | 58624107 | 58703196 | 79090  | rs12977919 | rs4801988  | 26  | 3 |
| 30891   | Control  | Male   | 19 | 58624107 | 58703196 | 79090  | rs12977919 | rs4801988  | 26  | 3 |
| con082  | Control  | Male   | 19 | 58624107 | 58703196 | 79090  | rs12977919 | rs4801988  | 26  | 3 |
| 20613   | Affected | Female | 19 | 58624107 | 58704092 | 79986  | rs12977919 | rs7258566  | 27  | 3 |
| 62776   | Control  | Female | 19 | 58624107 | 58704092 | 79986  | rs12977919 | rs7258566  | 27  | 3 |
| con087  | Control  | Male   | 19 | 58624107 | 58704092 | 79986  | rs12977919 | rs7258566  | 27  | 3 |
| 41451   | Affected | Female | 19 | 58624107 | 58705990 | 81884  | rs12977919 | rs37404    | 28  | 3 |
| 20528   | Affected | Male   | 19 | 58624107 | 58705990 | 81884  | rs12977919 | rs37404    | 28  | 1 |
| 60781   | Control  | Male   | 19 | 58624107 | 58705990 | 81884  | rs12977919 | rs37404    | 28  | 3 |
| 62522   | Control  | Male   | 19 | 58624107 | 58705990 | 81884  | rs12977919 | rs37404    | 28  | 3 |
| 51681   | Affected | Female | 19 | 34864124 | 34958442 | 94319  | rs8099974  | rs11672342 | 23  | 3 |
| 62851   | Affected | Female | 19 | 46822616 | 46921016 | 98401  | rs929502   | rs12985771 | 19  | 1 |
| 52499   | Affected | Male   | 19 | 59440823 | 59539399 | 98577  | rs422948   | rs17836364 | 29  | 1 |
| con037  | Control  | Male   | 19 | 58028179 | 58128149 | 99971  | rs10401828 | rs11673295 | 19  | 3 |
| 71066   | Affected | Male   | 20 | 1674256  | 1796203  | 121948 | rs635029   | rs11698167 | 28  | 3 |
| 52236   | Control  | Male   | 20 | 7985480  | 8179950  | 194471 | rs1024167  | rs6055692  | 67  | 3 |
| 61250   | Affected | Male   | 20 | 8044130  | 8523671  | 479542 | rs6055550  | rs6039206  | 175 | 3 |
| 06D6715 | Control  | Male   | 20 | 9685413  | 9829109  | 143697 | rs6118717  | rs2327206  | 48  | 3 |
| 62511   | Affected | Male   | 20 | 9685413  | 9833653  | 148241 | rs6118717  | rs914596   | 49  | 3 |
| 50943   | Control  | Female | 20 | 9685413  | 9833653  | 148241 | rs6118717  | rs914596   | 49  | 3 |

|         |          |        |    |          |          |        |            |            |     |   |
|---------|----------|--------|----|----------|----------|--------|------------|------------|-----|---|
| 30990   | Affected | Male   | 20 | 14348165 | 14496676 | 148512 | rs6105269  | rs6110333  | 41  | 1 |
| 51478   | Control  | Female | 20 | 14636519 | 14849776 | 213258 | rs17775664 | rs2423846  | 68  | 1 |
| 52506   | Control  | Female | 20 | 14645386 | 14849776 | 204391 | rs6079537  | rs2423846  | 67  | 1 |
| 73206   | Control  | Female | 20 | 14796659 | 15070743 | 274085 | rs449849   | rs381723   | 95  | 1 |
| 61055   | Control  | Male   | 20 | 14806910 | 15036585 | 229676 | rs6042957  | rs17357522 | 77  | 1 |
| 52476   | Control  | Female | 20 | 14884935 | 15052193 | 167259 | rs2423873  | rs1322112  | 58  | 1 |
| con088  | Control  | Female | 20 | 23372638 | 23517400 | 144763 | rs3746737  | rs4346460  | 33  | 1 |
| 52531   | Affected | Male   | 20 | 25125805 | 25413589 | 287785 | rs2268879  | rs2281212  | 31  | 3 |
| 62356   | Control  | Male   | 20 | 32201996 | 32388628 | 186633 | rs1015363  | rs1205339  | 19  | 3 |
| 51987   | Affected | Male   | 20 | 40617751 | 40676650 | 58900  | rs6016827  | rs2867488  | 25  | 1 |
| 52527   | Affected | Male   | 20 | 40615725 | 40676650 | 60926  | rs6016824  | rs2867488  | 27  | 1 |
| 61577   | Control  | Male   | 20 | 31224759 | 31289688 | 64930  | rs10485501 | rs6059183  | 12  | 1 |
| 60234   | Control  | Male   | 20 | 31216437 | 31289688 | 73252  | rs17124254 | rs6059183  | 13  | 1 |
| 71252   | Affected | Female | 20 | 212997   | 295908   | 82912  | rs6082056  | rs6084217  | 22  | 1 |
| 62228   | Affected | Male   | 20 | 31859046 | 31948090 | 89045  | rs2064505  | rs2092477  | 21  | 3 |
| 759     | Affected | Male   | 20 | 15000514 | 15091806 | 91293  | rs1407327  | rs4813172  | 47  | 1 |
| 1247    | Affected | Male   | 20 | 15000514 | 15091806 | 91293  | rs1407327  | rs4813172  | 47  | 1 |
| 61125   | Affected | Male   | 20 | 14679595 | 14771472 | 91878  | rs204091   | rs407097   | 46  | 1 |
| 70792   | Affected | Male   | 20 | 14695471 | 14788502 | 93032  | rs4141463  | rs6079584  | 42  | 1 |
| 52323   | Control  | Female | 21 | 45915789 | 46490760 | 574972 | rs2838973  | rs2839169  | 135 | 3 |
| 52175   | Control  | Female | 21 | 14474864 | 14652008 | 177145 | rs17305801 | rs2822624  | 83  | 3 |
| 06D6805 | Control  | Male   | 21 | 17742119 | 17880187 | 138069 | rs2824306  | rs2824376  | 40  | 3 |
| 70192   | Affected | Female | 21 | 34647599 | 34823160 | 175562 | rs11702479 | rs2243982  | 48  | 3 |
| 61389   | Affected | Male   | 21 | 34647599 | 34829283 | 181685 | rs11702479 | rs2834506  | 50  | 3 |
| 11423   | Affected | Male   | 21 | 36412525 | 36528540 | 116016 | rs2409758  | rs7280062  | 29  | 3 |
| 06D6223 | Control  | Female | 21 | 36412525 | 36528540 | 116016 | rs2409758  | rs7280062  | 29  | 3 |
| 60995   | Affected | Male   | 21 | 36412525 | 36528540 | 116016 | rs2409758  | rs7280062  | 29  | 3 |
| 980177  | Affected | Male   | 21 | 40373134 | 40500483 | 127350 | rs2254583  | rs13049234 | 56  | 1 |
| 61429   | Affected | Male   | 21 | 46391256 | 46601156 | 209901 | rs7282864  | rs11700399 | 46  | 1 |
| 70435   | Affected | Male   | 21 | 46761215 | 46823682 | 62468  | rs6518299  | rs2096509  | 30  | 3 |
| 70552   | Affected | Male   | 21 | 41794621 | 41863213 | 68593  | rs2187238  | rs12483160 | 20  | 1 |
| con090  | Control  | Female | 22 | 15298335 | 15842185 | 543851 | rs2027653  | rs4819932  | 89  | 3 |

|         |          |        |    |          |          |         |            |            |     |   |
|---------|----------|--------|----|----------|----------|---------|------------|------------|-----|---|
| 50646   | Affected | Male   | 22 | 15298335 | 15842185 | 543851  | rs2027653  | rs4819932  | 89  | 3 |
| 51888   | Affected | Male   | 22 | 15298335 | 15842185 | 543851  | rs2027653  | rs4819932  | 89  | 3 |
| 71214   | Control  | Female | 22 | 15298335 | 15842185 | 543851  | rs2027653  | rs4819932  | 89  | 3 |
| 1502    | Affected | Male   | 22 | 17257787 | 19792353 | 2534567 | rs2543958  | rs140392   | 512 | 1 |
| 51371   | Affected | Male   | 22 | 19063495 | 19792353 | 728859  | rs6003971  | rs140392   | 177 | 1 |
| 51723   | Affected | Female | 22 | 21328337 | 21995356 | 667020  | rs6003181  | rs6003620  | 127 | 3 |
| 61241   | Control  | Male   | 22 | 15298335 | 15674251 | 375917  | rs2027653  | rs7291429  | 39  | 3 |
| 960149  | Affected | Female | 22 | 15298335 | 15674251 | 375917  | rs2027653  | rs7291429  | 39  | 3 |
| 61642   | Affected | Male   | 22 | 15298335 | 15674251 | 375917  | rs2027653  | rs7291429  | 39  | 3 |
| 71020   | Affected | Male   | 22 | 15298335 | 15674251 | 375917  | rs2027653  | rs7291429  | 39  | 3 |
| 61748   | Affected | Male   | 22 | 15298335 | 15674251 | 375917  | rs2027653  | rs7291429  | 39  | 3 |
| 41889   | Affected | Male   | 22 | 15298335 | 15674251 | 375917  | rs2027653  | rs7291429  | 39  | 3 |
| 71326   | Control  | Male   | 22 | 15298335 | 15674251 | 375917  | rs2027653  | rs7291429  | 39  | 3 |
| 51986   | Control  | Male   | 22 | 15298335 | 15674251 | 375917  | rs2027653  | rs7291429  | 39  | 3 |
| 52400   | Affected | Male   | 22 | 15298335 | 15674251 | 375917  | rs2027653  | rs7291429  | 39  | 3 |
| 20057   | Affected | Male   | 22 | 15298335 | 15674251 | 375917  | rs2027653  | rs7291429  | 39  | 3 |
| 61055   | Control  | Male   | 22 | 15298335 | 15674251 | 375917  | rs2027653  | rs7291429  | 39  | 3 |
| 30846   | Control  | Male   | 22 | 15412698 | 15608796 | 196099  | rs5747620  | rs17433377 | 21  | 1 |
| 62884   | Affected | Male   | 22 | 15412698 | 15669118 | 256421  | rs5747620  | rs2072466  | 37  | 3 |
| 06D6530 | Control  | Female | 22 | 15412698 | 15674251 | 261554  | rs5747620  | rs7291429  | 38  | 3 |
| 980017  | Control  | Male   | 22 | 15412698 | 15706432 | 293735  | rs5747620  | rs2075120  | 52  | 3 |
| 970406  | Control  | Female | 22 | 15412698 | 15706432 | 293735  | rs5747620  | rs2075120  | 52  | 3 |
| 51058   | Affected | Female | 22 | 15467656 | 15674251 | 206596  | rs11089263 | rs7291429  | 33  | 3 |
| 61659   | Affected | Male   | 22 | 15563103 | 15674251 | 111149  | rs3016111  | rs7291429  | 23  | 3 |
| 11318   | Affected | Male   | 22 | 16006665 | 16214898 | 208234  | rs3788268  | rs9606695  | 59  | 3 |
| 60095   | Control  | Female | 22 | 17257787 | 17362097 | 104311  | rs2543958  | rs2913     | 23  | 3 |
| 60099   | Affected | Female | 22 | 17257787 | 17376565 | 118779  | rs2543958  | rs4431035  | 27  | 3 |
| 06D7077 | Control  | Female | 22 | 17257787 | 17388108 | 130322  | rs2543958  | rs2871006  | 28  | 1 |
| 52531   | Affected | Male   | 22 | 17257787 | 17388108 | 130322  | rs2543958  | rs2871006  | 28  | 1 |
| 970166  | Affected | Male   | 22 | 17257787 | 17388108 | 130322  | rs2543958  | rs2871006  | 28  | 1 |
| 60237   | Affected | Female | 22 | 17257787 | 17388108 | 130322  | rs2543958  | rs2871006  | 28  | 1 |
| 20401   | Affected | Male   | 22 | 17257787 | 17388108 | 130322  | rs2543958  | rs2871006  | 28  | 1 |

|         |          |        |    |          |          |        |            |            |     |   |
|---------|----------|--------|----|----------|----------|--------|------------|------------|-----|---|
| 60567   | Affected | Female | 22 | 17257787 | 17388108 | 130322 | rs2543958  | rs2871006  | 28  | 1 |
| 51359   | Control  | Female | 22 | 17257787 | 17388108 | 130322 | rs2543958  | rs2871006  | 28  | 1 |
| 70435   | Affected | Male   | 22 | 17257787 | 17388108 | 130322 | rs2543958  | rs2871006  | 28  | 1 |
| 20499   | Affected | Male   | 22 | 17257787 | 17388108 | 130322 | rs2543958  | rs2871006  | 28  | 1 |
| 41452   | Affected | Male   | 22 | 17257787 | 17388108 | 130322 | rs2543958  | rs2871006  | 28  | 1 |
| 62892   | Control  | Male   | 22 | 17257787 | 17388108 | 130322 | rs2543958  | rs2871006  | 28  | 3 |
| 70228   | Affected | Male   | 22 | 17257787 | 17388108 | 130322 | rs2543958  | rs2871006  | 28  | 3 |
| 06D6216 | Control  | Female | 22 | 17257787 | 17388108 | 130322 | rs2543958  | rs2871006  | 28  | 3 |
| 62547   | Control  | Female | 22 | 17257787 | 17388108 | 130322 | rs2543958  | rs2871006  | 28  | 3 |
| 61473   | Affected | Male   | 22 | 17257787 | 17388108 | 130322 | rs2543958  | rs2871006  | 28  | 3 |
| 20349   | Affected | Male   | 22 | 17257787 | 17388108 | 130322 | rs2543958  | rs2871006  | 28  | 3 |
| 60234   | Control  | Male   | 22 | 17257787 | 17388108 | 130322 | rs2543958  | rs2871006  | 28  | 3 |
| 30392   | Affected | Female | 22 | 17257787 | 17388108 | 130322 | rs2543958  | rs2871006  | 28  | 3 |
| 62818   | Control  | Male   | 22 | 17257787 | 17388108 | 130322 | rs2543958  | rs2871006  | 28  | 3 |
| 70298   | Affected | Male   | 22 | 17257787 | 17388108 | 130322 | rs2543958  | rs2871006  | 28  | 3 |
| 20478   | Affected | Female | 22 | 17257787 | 17388108 | 130322 | rs2543958  | rs2871006  | 28  | 3 |
| 52368   | Affected | Female | 22 | 17257787 | 17388108 | 130322 | rs2543958  | rs2871006  | 28  | 3 |
| 60330   | Control  | Female | 22 | 17257787 | 17388108 | 130322 | rs2543958  | rs2871006  | 28  | 3 |
| 20505   | Affected | Male   | 22 | 17257787 | 17388108 | 130322 | rs2543958  | rs2871006  | 28  | 3 |
| 61703   | Control  | Female | 22 | 17257787 | 17406613 | 148827 | rs2543958  | rs2072123  | 30  | 3 |
| 72436   | Affected | Female | 22 | 17257787 | 17413532 | 155746 | rs2543958  | rs5992354  | 32  | 3 |
| 61615   | Affected | Male   | 22 | 17270615 | 17388108 | 117494 | rs17742907 | rs2871006  | 27  | 3 |
| 31008   | Control  | Female | 22 | 19420148 | 19792353 | 372206 | rs11705170 | rs140392   | 102 | 3 |
| 06D6612 | Control  | Female | 22 | 20645312 | 20893068 | 247757 | rs2283797  | rs5750720  | 165 | 3 |
| 06D6761 | Control  | Female | 22 | 20645312 | 20903637 | 258326 | rs2283797  | rs12159423 | 170 | 3 |
| 990265  | Affected | Female | 22 | 20645312 | 20903637 | 258326 | rs2283797  | rs12159423 | 170 | 3 |
| 20404   | Affected | Male   | 22 | 20645312 | 20903637 | 258326 | rs2283797  | rs12159423 | 170 | 3 |
| 61202   | Affected | Male   | 22 | 20645312 | 20903637 | 258326 | rs2283797  | rs12159423 | 170 | 3 |
| 11291   | Affected | Male   | 22 | 20645312 | 20903637 | 258326 | rs2283797  | rs12159423 | 170 | 3 |
| 61793   | Control  | Female | 22 | 20658391 | 20903637 | 245247 | rs6000377  | rs12159423 | 169 | 1 |
| 980026  | Control  | Male   | 22 | 20679088 | 20903637 | 224550 | rs238775   | rs12159423 | 165 | 3 |
| 52292   | Affected | Female | 22 | 20679088 | 20903637 | 224550 | rs238775   | rs12159423 | 165 | 3 |



|         |          |        |    |          |          |        |           |            |     |   |
|---------|----------|--------|----|----------|----------|--------|-----------|------------|-----|---|
| 42001   | Affected | Male   | 22 | 20679088 | 20903637 | 224550 | rs238775  | rs12159423 | 165 | 3 |
| 70950   | Control  | Female | 22 | 20679088 | 20903637 | 224550 | rs238775  | rs12159423 | 165 | 3 |
| con025  | Control  | Male   | 22 | 22488315 | 22668071 | 179757 | rs738800  | rs6004011  | 52  | 3 |
| 72878   | Control  | Female | 22 | 23966680 | 24240667 | 273988 | rs4822591 | rs79091    | 55  | 1 |
| 51925   | Control  | Male   | 22 | 23966680 | 24288952 | 322273 | rs4822591 | rs2205971  | 72  | 3 |
| 61034   | Control  | Female | 22 | 23980406 | 24238441 | 258036 | rs5760942 | rs637629   | 50  | 3 |
| con077  | Control  | Male   | 22 | 23980406 | 24238441 | 258036 | rs5760942 | rs637629   | 50  | 3 |
| 960120  | Affected | Female | 22 | 23980406 | 24240667 | 260262 | rs5760942 | rs79091    | 53  | 1 |
| 970786  | Control  | Male   | 22 | 23980406 | 24240667 | 260262 | rs5760942 | rs79091    | 53  | 1 |
| 72480   | Affected | Female | 22 | 23980406 | 24240667 | 260262 | rs5760942 | rs79091    | 53  | 1 |
| 71180   | Affected | Female | 22 | 23980406 | 24240667 | 260262 | rs5760942 | rs79091    | 53  | 3 |
| 52287   | Control  | Female | 22 | 23991725 | 24159084 | 167360 | rs9612921 | rs11090391 | 25  | 3 |
| 20529   | Affected | Female | 22 | 23991725 | 24230823 | 239099 | rs9612921 | rs2006866  | 44  | 3 |
| 71026   | Affected | Male   | 22 | 23991725 | 24240667 | 248943 | rs9612921 | rs79091    | 52  | 1 |
| 60837   | Control  | Male   | 22 | 23991725 | 24240667 | 248943 | rs9612921 | rs79091    | 52  | 1 |
| 71066   | Affected | Male   | 22 | 23991725 | 24240667 | 248943 | rs9612921 | rs79091    | 52  | 1 |
| 06D6444 | Control  | Female | 22 | 23991725 | 24240667 | 248943 | rs9612921 | rs79091    | 52  | 1 |
| 70586   | Affected | Male   | 22 | 23991725 | 24240667 | 248943 | rs9612921 | rs79091    | 52  | 1 |
| 62347   | Control  | Female | 22 | 23991725 | 24240667 | 248943 | rs9612921 | rs79091    | 52  | 1 |
| 06D6314 | Control  | Male   | 22 | 23991725 | 24240667 | 248943 | rs9612921 | rs79091    | 52  | 1 |
| 60205   | Affected | Male   | 22 | 23991725 | 24240667 | 248943 | rs9612921 | rs79091    | 52  | 1 |
| 51888   | Affected | Male   | 22 | 23991725 | 24240667 | 248943 | rs9612921 | rs79091    | 52  | 1 |
| 61572   | Control  | Male   | 22 | 23991725 | 24240667 | 248943 | rs9612921 | rs79091    | 52  | 1 |
| 20643   | Affected | Male   | 22 | 23991725 | 24240667 | 248943 | rs9612921 | rs79091    | 52  | 1 |
| 20497   | Affected | Female | 22 | 23991725 | 24240667 | 248943 | rs9612921 | rs79091    | 52  | 1 |
| 61670   | Affected | Male   | 22 | 23991725 | 24240667 | 248943 | rs9612921 | rs79091    | 52  | 1 |
| 960361  | Affected | Male   | 22 | 23991725 | 24240667 | 248943 | rs9612921 | rs79091    | 52  | 3 |
| 50010   | Affected | Male   | 22 | 23991725 | 24240667 | 248943 | rs9612921 | rs79091    | 52  | 3 |
| 71417   | Affected | Male   | 22 | 23991725 | 24240667 | 248943 | rs9612921 | rs79091    | 52  | 3 |
| 62443   | Control  | Female | 22 | 23991725 | 24240667 | 248943 | rs9612921 | rs79091    | 52  | 3 |
| 60363   | Control  | Female | 22 | 23991725 | 24240667 | 248943 | rs9612921 | rs79091    | 52  | 3 |
| 71183   | Control  | Female | 22 | 23991725 | 24240667 | 248943 | rs9612921 | rs79091    | 52  | 3 |

|         |          |        |    |          |          |        |           |           |    |   |
|---------|----------|--------|----|----------|----------|--------|-----------|-----------|----|---|
| 62567   | Control  | Male   | 22 | 23991725 | 24240667 | 248943 | rs9612921 | rs79091   | 52 | 3 |
| 960224  | Affected | Male   | 22 | 23991725 | 24240667 | 248943 | rs9612921 | rs79091   | 52 | 3 |
| 61745   | Control  | Female | 22 | 23991725 | 24240667 | 248943 | rs9612921 | rs79091   | 52 | 3 |
| 70565   | Affected | Male   | 22 | 23991725 | 24240667 | 248943 | rs9612921 | rs79091   | 52 | 3 |
| 51913   | Affected | Male   | 22 | 23991725 | 24240667 | 248943 | rs9612921 | rs79091   | 52 | 3 |
| 41386   | Affected | Male   | 22 | 23991725 | 24240667 | 248943 | rs9612921 | rs79091   | 52 | 3 |
| 11303   | Affected | Male   | 22 | 23991725 | 24240667 | 248943 | rs9612921 | rs79091   | 52 | 3 |
| 51276   | Affected | Female | 22 | 23991725 | 24240667 | 248943 | rs9612921 | rs79091   | 52 | 3 |
| 70860   | Affected | Male   | 22 | 23994408 | 24136949 | 142542 | rs138558  | rs469997  | 22 | 3 |
| con067  | Control  | Male   | 22 | 23994408 | 24165514 | 171107 | rs138558  | rs1207587 | 25 | 3 |
| 11315   | Affected | Female | 22 | 23994408 | 24173884 | 179477 | rs138558  | rs574946  | 26 | 4 |
| 51187   | Affected | Female | 22 | 23994408 | 24173884 | 179477 | rs138558  | rs574946  | 26 | 4 |
| 51713   | Affected | Male   | 22 | 23994408 | 24219385 | 224978 | rs138558  | rs6004675 | 39 | 3 |
| 70208   | Affected | Male   | 22 | 23994408 | 24219385 | 224978 | rs138558  | rs6004675 | 39 | 3 |
| 61717   | Affected | Male   | 22 | 23994408 | 24234257 | 239850 | rs138558  | rs5761092 | 44 | 3 |
| 20481   | Affected | Male   | 22 | 23994408 | 24236803 | 242396 | rs138558  | rs476240  | 46 | 3 |
| 52192   | Control  | Male   | 22 | 23994408 | 24236803 | 242396 | rs138558  | rs476240  | 46 | 3 |
| 970898  | Affected | Male   | 22 | 23994408 | 24240667 | 246260 | rs138558  | rs79091   | 51 | 1 |
| 51368   | Affected | Male   | 22 | 23994408 | 24240667 | 246260 | rs138558  | rs79091   | 51 | 1 |
| 61921   | Affected | Male   | 22 | 23994408 | 24240667 | 246260 | rs138558  | rs79091   | 51 | 1 |
| 06D6637 | Control  | Female | 22 | 23994408 | 24240667 | 246260 | rs138558  | rs79091   | 51 | 1 |
| 71403   | Control  | Male   | 22 | 23994408 | 24240667 | 246260 | rs138558  | rs79091   | 51 | 1 |
| 11327   | Affected | Female | 22 | 23994408 | 24240667 | 246260 | rs138558  | rs79091   | 51 | 1 |
| 30843   | Affected | Male   | 22 | 23994408 | 24240667 | 246260 | rs138558  | rs79091   | 51 | 1 |
| 51637   | Affected | Female | 22 | 23994408 | 24240667 | 246260 | rs138558  | rs79091   | 51 | 1 |
| 61202   | Affected | Male   | 22 | 23994408 | 24240667 | 246260 | rs138558  | rs79091   | 51 | 1 |
| 1975    | Affected | Male   | 22 | 23994408 | 24240667 | 246260 | rs138558  | rs79091   | 51 | 1 |
| 51379   | Affected | Male   | 22 | 23994408 | 24240667 | 246260 | rs138558  | rs79091   | 51 | 1 |
| 11360   | Affected | Male   | 22 | 23994408 | 24240667 | 246260 | rs138558  | rs79091   | 51 | 1 |
| 60827   | Affected | Male   | 22 | 23994408 | 24240667 | 246260 | rs138558  | rs79091   | 51 | 3 |
| 62020   | Control  | Female | 22 | 23994408 | 24240667 | 246260 | rs138558  | rs79091   | 51 | 3 |
| con068  | Control  | Female | 22 | 23994408 | 24240667 | 246260 | rs138558  | rs79091   | 51 | 3 |

|         |          |        |    |          |          |        |           |           |    |   |
|---------|----------|--------|----|----------|----------|--------|-----------|-----------|----|---|
| 51452   | Control  | Male   | 22 | 23994408 | 24240667 | 246260 | rs138558  | rs79091   | 51 | 3 |
| 10160   | Affected | Male   | 22 | 23994408 | 24240667 | 246260 | rs138558  | rs79091   | 51 | 3 |
| con052  | Control  | Female | 22 | 23994408 | 24240667 | 246260 | rs138558  | rs79091   | 51 | 3 |
| 30846   | Control  | Male   | 22 | 23994408 | 24240667 | 246260 | rs138558  | rs79091   | 51 | 3 |
| 71473   | Control  | Female | 22 | 23994408 | 24240667 | 246260 | rs138558  | rs79091   | 51 | 3 |
| 60206   | Affected | Male   | 22 | 23994408 | 24240667 | 246260 | rs138558  | rs79091   | 51 | 3 |
| 60811   | Control  | Male   | 22 | 23994408 | 24240667 | 246260 | rs138558  | rs79091   | 51 | 3 |
| 70759   | Affected | Male   | 22 | 23994408 | 24240667 | 246260 | rs138558  | rs79091   | 51 | 3 |
| 1679    | Affected | Male   | 22 | 23994408 | 24240667 | 246260 | rs138558  | rs79091   | 51 | 3 |
| 41199   | Affected | Female | 22 | 23994408 | 24240667 | 246260 | rs138558  | rs79091   | 51 | 3 |
| 51857   | Affected | Male   | 22 | 23994408 | 24240667 | 246260 | rs138558  | rs79091   | 51 | 3 |
| 60705   | Control  | Male   | 22 | 23994408 | 24240667 | 246260 | rs138558  | rs79091   | 51 | 3 |
| 1086    | Affected | Female | 22 | 23994408 | 24240667 | 246260 | rs138558  | rs79091   | 51 | 3 |
| 60924   | Control  | Female | 22 | 23999581 | 24240667 | 241087 | rs6004527 | rs79091   | 50 | 3 |
| 11085   | Affected | Female | 22 | 23999581 | 24240667 | 241087 | rs6004527 | rs79091   | 50 | 3 |
| 06D6472 | Control  | Female | 22 | 23999581 | 24240667 | 241087 | rs6004527 | rs79091   | 50 | 3 |
| 52262   | Control  | Male   | 22 | 23999581 | 24240667 | 241087 | rs6004527 | rs79091   | 50 | 3 |
| 62750   | Control  | Male   | 22 | 24016040 | 24219385 | 203346 | rs6004549 | rs6004675 | 37 | 3 |
| 50820   | Affected | Male   | 22 | 24016040 | 24240667 | 224628 | rs6004549 | rs79091   | 49 | 1 |
| 970175  | Control  | Male   | 22 | 24016040 | 24240667 | 224628 | rs6004549 | rs79091   | 49 | 1 |
| 50573   | Affected | Male   | 22 | 24016040 | 24240667 | 224628 | rs6004549 | rs79091   | 49 | 1 |
| 71145   | Affected | Male   | 22 | 24016040 | 24240667 | 224628 | rs6004549 | rs79091   | 49 | 1 |
| 06D6206 | Control  | Female | 22 | 24016040 | 24240667 | 224628 | rs6004549 | rs79091   | 49 | 3 |
| 06D6780 | Control  | Female | 22 | 24026997 | 24238441 | 211445 | rs133118  | rs637629  | 43 | 3 |
| 60642   | Control  | Female | 22 | 24026997 | 24240667 | 213671 | rs133118  | rs79091   | 46 | 3 |
| 62846   | Affected | Female | 22 | 24056992 | 24240667 | 183676 | rs5761018 | rs79091   | 44 | 3 |
| 20617   | Affected | Male   | 22 | 24062697 | 24219385 | 156689 | rs8139746 | rs6004675 | 31 | 3 |
| 40247   | Affected | Male   | 22 | 24062697 | 24236803 | 174107 | rs8139746 | rs476240  | 38 | 3 |
| con020  | Control  | Male   | 22 | 24083777 | 24238441 | 154665 | rs5996921 | rs637629  | 39 | 3 |
| 73261   | Control  | Male   | 22 | 24083777 | 24240667 | 156891 | rs5996921 | rs79091   | 42 | 3 |
| 51372   | Control  | Female | 22 | 24083777 | 24240667 | 156891 | rs5996921 | rs79091   | 42 | 3 |
| 51518   | Control  | Female | 22 | 24083777 | 24240667 | 156891 | rs5996921 | rs79091   | 42 | 3 |

|         |          |        |    |          |          |        |           |           |    |   |
|---------|----------|--------|----|----------|----------|--------|-----------|-----------|----|---|
| 70251   | Control  | Female | 22 | 24083777 | 24240667 | 156891 | rs5996921 | rs79091   | 42 | 3 |
| 71465   | Control  | Male   | 22 | 24215188 | 24324013 | 108826 | rs8141065 | rs1008673 | 35 | 3 |
| 52014   | Control  | Male   | 22 | 45502280 | 45682591 | 180312 | rs9626899 | rs5769232 | 55 | 3 |
| 20231   | Affected | Male   | 22 | 45502280 | 45682591 | 180312 | rs9626899 | rs5769232 | 55 | 3 |
| 970806  | Control  | Female | 22 | 32191950 | 32259352 | 67403  | rs9621704 | rs2267226 | 22 | 3 |
| 11083   | Affected | Male   | 22 | 37857855 | 37935695 | 77841  | rs139383  | rs2050143 | 22 | 1 |
| 62034   | Control  | Male   | 22 | 17281004 | 17362097 | 81094  | rs450046  | rs2913    | 21 | 3 |
| 72460   | Control  | Female | 22 | 31340757 | 31427662 | 86906  | rs2858226 | rs5998590 | 43 | 3 |
| 52506   | Control  | Female | 22 | 17426677 | 17514083 | 87407  | rs2238735 | rs4819778 | 22 | 3 |
| 62620   | Affected | Male   | 22 | 17257787 | 17347371 | 89585  | rs2543958 | rs5747950 | 19 | 3 |
| 06D6368 | Control  | Female | 22 | 24083777 | 24178811 | 95035  | rs5996921 | rs6004652 | 18 | 3 |
| 20422   | Affected | Female | 22 | 17257787 | 17355587 | 97801  | rs2543958 | rs2518805 | 21 | 3 |
| 06D6321 | Control  | Female | 22 | 17257787 | 17355587 | 97801  | rs2543958 | rs2518805 | 21 | 3 |

**Table S2. Copy Number Variations in Schizophrenia; own data****Notes:**

1) Details input parameters:

PennCNV:

- Default settings
- --gcmodel for GC-correction
- Version November 2008

QuantiSNP:

- Default settings
- GC-correction
- As described before: Stefansson *et al.* (2008)<sup>1</sup> and Vrijenhoek *et al.* (2008)<sup>2</sup>

2) The following filtering steps were carried out for CNVs listed in this table:

PennCNV analysis:

- a. The total number of markers involved per CNV  $\geq 10$
- b. Confidence score divided by the number of markers involved  $> 0.5$
- c. Basepair length divided by the number of markers involved  $< 10$  kb

**Total of 21,182 CNVs passed filtering steps**Overlap PennCNV analysis with QuantiSNP analysis:

- d. All gene rich CNVs were used to create a file of all CNVs both called with PennCNV and QuantiSNP. RefSeq genes were identified residing within the CNVs and up to a fuzzy border of 50 kb.

Total of gene-rich CNVs for QuantiSNP:  $n = 3,767$ Total of gene-rich CNVs for PennCNV:  $n = 13,849$ **Total of 2,437 CNVs showed overlap between PennCNV and QuantiSNP**

- e. Only CNVs  $> 50$  kb are selected

**Total of 1,896 CNVs > 50 kb were selected**Total of CNVs 50 - 100 kb = **738** (= 38.9% of total CNVs; added in a separate table at the end of each chromosome)Total of CNVs 100 - 500 kb = **1,068** (= 56.3% of total CNVs; black in table)Total of CNVs  $> 500$  kb = **90** (= 4.8% of total CNVs; blue bold in table)

<sup>1</sup> Stefansson H, Rujescu D, Cichon S, Pietiläinen O, Ingason A, Steinberg S, *et al.* (2008): Large recurrent microdeletions associated with schizophrenia *Nature* 455: 232-236

<sup>2</sup> Vrijenhoek T, Buizer-Voskamp JE, van der Stelt I, Strengman E, GROUP Consortium, Sabatti C, *et al.* (2008): Recurrent CNVs disrupt three candidate genes in schizophrenia patients. *Am J Med Genet Part B* 83: 504-510

3) Abbreviations:

# Ids = number of total subjects with the CNV, Case.Control = both cases and controls have this CNV, Male.Female = both male and female have this CNV, Chr = chromosome, Bp Start = basepair start of CNV, Bp End = basepair end of CNV, Bp Length = total basepair length of CNV, Rs Start = marker start of CNV, Rs End = marker end of CNV, # Del SNPs = total number of markers involved in CNV (.. if number of markers is unknown), Type = 0/1 Deletion, 3/4 Duplication, 1.3 / 3.1 / etc = This CNV involves both duplications and deletions.

- 4) **Only CNVs > 500 kb are shown in the chromosome ideogram.** Duplications are depicted in blue; Deletions are red. Cases are depicted on top of the chromosome, Controls are depicted below the chromosome. No CNV data for sex chromosomes was available.
- 5) Multiple case entries can be tracked down in the chromosome ideogram.
- 6) All cases have been diagnosed according to DSM classification with validated checklists. Therefore, for all cases a quality of phenotype \*\*\*\* is applicable.
- 7) In total, 1506 subjects were analyzed for CNVs:

|                            |         |     |
|----------------------------|---------|-----|
| <b>Total Affected: 834</b> | Male:   | 622 |
|                            | Female: | 212 |
| <b>Total Controls: 672</b> | Male:   | 331 |
|                            | Female: | 341 |

## Chromosome 1

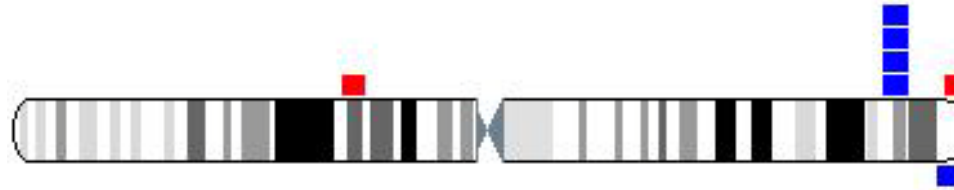

| #<br>Ids | Status           | Gender             | Band<br>position | Bp Start           | Bp End             | Bp<br>Length     | Rs Start          | Rs End            | # Del<br>SNPs | Type     |
|----------|------------------|--------------------|------------------|--------------------|--------------------|------------------|-------------------|-------------------|---------------|----------|
| 1        | Control          | Female             | 1p36.33          | 995,669            | 1,111,657          | 115,989          | rs3934834         | rs11260549        | 20            | 3        |
| 1        | Case             | Female             | 1p36.22          | 9,208,308          | 9,319,247          | 110,940          | rs10489436        | rs11121374        | 27            | 3        |
| 1        | Control          | Female             | 1p34.2           | 39,979,097         | 40,080,306         | 101,210          | rs580699          | rs230310          | 19            | 3        |
| 1        | Control          | Female             | 1p32.3           | 54,879,395         | 55,075,307         | 195,913          | rs1655524         | rs1544908         | 55            | 3        |
| 1        | Case             | Male               | 1p22.3           | 84,784,450         | 84,906,200         | 121,751          | rs11164005        | rs11164036        | 27            | 3        |
| 1        | Control          | Male               | 1p22.2           | 90,293,206         | 90,440,693         | 147,488          | rs12079836        | rs10754298        | 56            | 3        |
| <b>1</b> | <b>Case</b>      | <b>Male</b>        | <b>1p22.2</b>    | <b>90,624,121</b>  | <b>91,406,022</b>  | <b>781,902</b>   | <b>rs997077</b>   | <b>rs620760</b>   | <b>134</b>    | <b>1</b> |
| 1        | Case             | Male               | 1p13.2           | 112,964,565        | 113,366,167        | 401,603          | rs37795820        | rs1728232         | 45            | 3        |
| 5        | Case.Control     | Male.Female        | 1q21.1           | 144,337,336        | 144,458,820        | 121,485          | rs4246521         | rs1284300         | 13            | 3.1      |
| 1        | Control          | Female             | 1q21.1           | 145,251,781        | 145,394,019        | 142,239          | rs945742          | rs4950437         | 29            | 1        |
| 2        | All cases        | All male           | 1q21.3           | 150,726,371        | 150,990,677        | 264,307          | rs1199156         | rs1332506         | 44            | 3        |
| 1        | Control          | Male               | 1q25.1           | 173,697,478        | 174,005,626        | 308,149          | rs7547439         | rs640692          | 72            | 3        |
| 1        | Case             | Female             | 1q25.2           | 174,809,772        | 175,085,370        | 275,599          | rs10489474        | rs12091765        | 51            | 1        |
| 1        | Control          | Female             | 1q25.3           | 180,249,584        | 180,536,324        | 286,741          | rs4418557         | rs2985431         | 72            | 3        |
| 1        | Control          | Male               | 1q31.1           | 188,554,336        | 188,712,876        | 158,541          | rs655598          | rs1171050         | 25            | 1        |
| 2        | All cases        | All male           | 1q41             | 214,000,083        | 214,182,331        | 182,249          | rs2797227         | rs683804          | 64            | 1        |
| 1        | Control          | Male               | 1q41             | 215,771,293        | 215,961,460        | 190,168          | rs1930301         | rs12064774        | 33            | 1        |
| 3        | Case.Control     | Male.Female        | 1q42.2           | 229,771,352        | 229,917,902        | 146,550          | rs12040246        | rs1934909         | ..            | 3        |
| <b>4</b> | <b>All cases</b> | <b>Male.Female</b> | <b>1q42.3-43</b> | <b>233,845,760</b> | <b>234,789,801</b> | <b>944,042</b>   | <b>rs10926264</b> | <b>rs10754577</b> | <b>216</b>    | <b>3</b> |
| 2        | All cases        | All male           | 1q43             | 236,719,591        | 236,844,151        | 124,560          | rs4659875         | rs574819          | ..            | 4        |
| 1        | Case             | Male               | 1q44             | 243,347,970        | 243,456,870        | 108,901          | rs4072543         | rs10924127        | 40            | 3        |
| 1        | Case             | Male               | 1q44             | 243,587,205        | 243,770,613        | 183,409          | rs4498839         | rs9919234         | 80            | 1        |
| 1        | Control          | Female             | 1q44             | 244,279,145        | 244,523,837        | 244,693          | rs12751188        | rs7516664         | 55            | 1        |
| <b>1</b> | <b>Control</b>   | <b>Female</b>      | <b>1q44</b>      | <b>244,476,735</b> | <b>244,995,641</b> | <b>518,907</b>   | <b>rs1361409</b>  | <b>rs4926440</b>  | <b>91</b>     | <b>3</b> |
| <b>1</b> | <b>Case</b>      | <b>Female</b>      | <b>1q44</b>      | <b>245,916,096</b> | <b>247,177,330</b> | <b>1,261,235</b> | <b>rs12402455</b> | <b>rs6704311</b>  | <b>142</b>    | <b>1</b> |

**CNVs 50 – 100 kb**

| #<br>Ids | Status       | Gender      | Chr | Bp Start    | Bp End      | Bp<br>Length | Rs Start   | Rs End     | # Del<br>SNPs | Type |
|----------|--------------|-------------|-----|-------------|-------------|--------------|------------|------------|---------------|------|
| 1        | Case         | Female      | 1   | 2,909,010   | 2,986,462   | 77,453       | rs6424065  | rs1569419  | 18            | 3    |
| 1        | Control      | Female      | 1   | 3,533,353   | 3,601,752   | 68,400       | rs4648538  | rs3765731  | 14            | 3    |
| 1        | Control      | Female      | 1   | 9,232,333   | 9,302,280   | 69,948       | rs732950   | rs1294046  | 19            | 3    |
| 2        | All cases    | Male.Female | 1   | 9,240,988   | 9,319,247   | 78,260       | rs3753163  | rs11121374 | 21            | 3    |
| 7        | Case.Control | Male.Female | 1   | 9,243,828   | 9,319,247   | 75,420       | rs2268169  | rs11121374 | 20            | 3    |
| 12       | Case.Control | Male.Female | 1   | 12,783,336  | 12,836,483  | 53,148       | rs1736763  | rs11810835 | 11            | 3.1  |
| 1        | Control      | Male        | 1   | 57,987,244  | 58,065,209  | 77,966       | rs10889070 | rs706411   | 23            | 1    |
| 1        | Control      | Male        | 1   | 65,708,082  | 65,772,622  | 64,541       | rs6588147  | rs1022981  | 14            | 1    |
| 1        | Case         | Female      | 1   | 154,601,735 | 154,688,278 | 86,544       | rs2764406  | rs2477972  | 26            | 3    |
| 11       | Case.Control | Male.Female | 1   | 195,089,653 | 195,163,711 | 74,059       | rs16840607 | rs4915318  | 10            | 3.1  |
| 1        | Case         | Male        | 1   | 199,297,930 | 199,348,566 | 50,637       | rs2297903  | rs2281845  | 36            | 3    |
| 1        | Case         | Male        | 1   | 202,530,432 | 202,593,220 | 62,789       | rs11240716 | rs3014614  | 25            | 3    |
| 1        | Case         | Male        | 1   | 211,097,781 | 211,193,164 | 95,384       | rs1047881  | rs2935214  | 27            | 3    |
| 1        | Case         | Female      | 1   | 222,403,259 | 222,494,884 | 91,626       | rs10916370 | rs4654009  | 12            | 3    |
| 1        | Control      | Female      | 1   | 229,771,352 | 229,846,734 | 75,383       | rs12040246 | rs12084975 | 17            | 3    |
| 1        | Case         | Male        | 1   | 229,791,491 | 229,879,757 | 88,267       | rs1612154  | rs6541281  | 21            | 3    |



## Chromosome 2

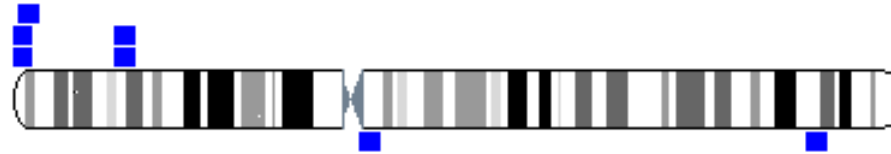

| #<br>Ids | Status           | Gender             | Band<br>position | Bp Start           | Bp End             | Bp<br>Length     | Rs Start          | Rs End            | # Del<br>SNPs | Type     |
|----------|------------------|--------------------|------------------|--------------------|--------------------|------------------|-------------------|-------------------|---------------|----------|
| 5        | Case.Control     | Male.Female        | 2p25.3           | 19,443             | 373,458            | 354,016          | rs4637157         | rs4374407         | 51            | 1.3      |
| <b>2</b> | <b>All cases</b> | <b>All male</b>    | <b>2p25.3</b>    | <b>381,781</b>     | <b>4,176,616</b>   | <b>3,794,836</b> | <b>rs12475610</b> | <b>rs1983365</b>  | <b>954</b>    | <b>3</b> |
| 1        | Case             | Male               | 2p25.3           | 686,317            | 904,564            | 218,248          | rs4517996         | rs4854431         | 41            | 3        |
| <b>1</b> | <b>Case</b>      | <b>Male</b>        | <b>2p25.2</b>    | <b>6,291,555</b>   | <b>6,926,633</b>   | <b>635,079</b>   | <b>rs6743687</b>  | <b>rs2712029</b>  | <b>181</b>    | <b>3</b> |
| 3        | Case.Control     | Male.Female        | 2p25.1           | 10,529,542         | 10,902,815         | 373,273          | rs818169          | rs1734389         | ..            | 3        |
| 1        | Control          | Female             | 2p23.2           | 29,151,876         | 29,318,933         | 167,058          | rs7583117         | rs13391633        | 73            | 3        |
| <b>2</b> | <b>All cases</b> | <b>Male.Female</b> | <b>2p22.3</b>    | <b>32,487,194</b>  | <b>33,183,461</b>  | <b>696,268</b>   | <b>rs7609320</b>  | <b>rs11124305</b> | <b>155</b>    | <b>3</b> |
| 1        | Case             | Male               | 2p22.3           | 33,068,411         | 33,178,482         | 110,072          | rs10181178        | rs218214          | 45            | 1        |
| 1        | Control          | Female             | 2p22.3           | 33,746,267         | 34,005,364         | 259,098          | rs13035680        | rs13414817        | 81            | 1        |
| 1        | Control          | Male               | 2p22.2           | 38,114,628         | 38,313,434         | 198,807          | rs336037          | rs3856501         | 69            | 3        |
| 1        | Case             | Male               | 2p22.2-22.1      | 38,424,759         | 38,862,453         | 437,695          | rs10198323        | rs1056104         | 84            | 3        |
| 1        | Control          | Female             | 2p21             | 44,432,402         | 44,611,058         | 178,657          | rs11680553        | rs10495919        | 41            | 1        |
| 1        | Control          | Female             | 2p16.3           | 49,071,420         | 49,193,234         | 121,815          | rs2072486         | rs11891561        | 43            | 1        |
| 2        | Case.Control     | Male.Female        | 2p16.3           | 50,786,446         | 50,900,862         | 114,417          | rs1518548         | rs9309203         | 39            | 3        |
| 2        | All cases        | Male.Female        | 2p16.3           | 51,002,576         | 51,255,180         | 252,604          | rs7423296         | rs964865          | ..            | 1        |
| <b>1</b> | <b>Control</b>   | <b>Male</b>        | <b>2q11.2</b>    | <b>98,267,182</b>  | <b>98,904,001</b>  | <b>636,820</b>   | <b>rs17428262</b> | <b>rs9087672</b>  | <b>96</b>     | <b>3</b> |
| 7        | Case.Control     | All male           | 2q13             | 110,186,944        | 110,339,819        | 152,875          | rs163667          | rs13386516        | ..            | 3.1      |
| 1        | Case             | Male               | 2q21.1           | 131,198,948        | 131,668,431        | 469,484          | rs11680782        | rs1834274         | 60            | 1        |
| 1        | Case             | Female             | 2q22.1           | 141,791,627        | 141,933,237        | 141,611          | rs6712429         | rs7605083         | 40            | 1        |
| 1        | Control          | Male               | 2q23.1           | 148,806,584        | 148,918,245        | 111,662          | rs1453317         | rs1446553         | 20            | 1        |
| 2        | All controls     | Male.Female        | 2q24.2           | 160,303,373        | 160,451,108        | 147,736          | rs4477859         | rs2271383         | 32            | 3        |
| 1        | Control          | Female             | 2q31.1           | 176,852,275        | 176,957,218        | 104,944          | rs12151388        | rs2069172         | 14            | 3        |
| 1        | Control          | Male               | 2q31.3           | 180,481,341        | 180,592,740        | 111,400          | rs9288043         | rs262269          | 22            | 1        |
| 1        | Case             | Male               | 2q32.1           | 183,398,499        | 183,724,872        | 326,374          | rs11902959        | rs3762477         | 57            | 3        |
| 1        | Control          | Male               | 2q32.2           | 190,701,607        | 190,970,187        | 268,581          | rs6718711         | rs11695439        | 51            | 3        |
| 1        | Control          | Male               | 2q35             | 217,671,980        | 217,876,096        | 204,117          | rs13405034        | rs4674141         | 35            | 1        |
| <b>1</b> | <b>Control</b>   | <b>Male</b>        | <b>2q35-36.1</b> | <b>220,979,372</b> | <b>222,139,227</b> | <b>1,159,856</b> | <b>rs4553816</b>  | <b>rs3770143</b>  | <b>252</b>    | <b>3</b> |

|    |              |             |        |             |             |         |            |            |     |   |
|----|--------------|-------------|--------|-------------|-------------|---------|------------|------------|-----|---|
| 1  | Control      | Female      | 2q37.1 | 232,913,134 | 233,017,792 | 104,659 | rs1554296  | rs790040   | 19  | 3 |
| 2  | All cases    | All male    | 2q37.3 | 237,695,944 | 238,189,006 | 493,063 | rs10195205 | rs13414926 | 144 | 3 |
| 26 | Case.Control | Male.Female | 2q37.3 | 242,565,979 | 242,692,820 | 126,842 | rs12987376 | rs12469535 | 17  | 1 |

**CNVs 50 – 100 kb**

| #<br>Ids | Status       | Gender      | Chr | Bp Start    | Bp End      | Bp<br>Length | Rs Start   | Rs End     | # Del<br>SNPs | Type |
|----------|--------------|-------------|-----|-------------|-------------|--------------|------------|------------|---------------|------|
| 1        | Case         | Female      | 2   | 33,517,854  | 33,595,788  | 77,935       | rs604788   | rs4670648  | 53            | 1    |
| 1        | Case         | Female      | 2   | 33,528,008  | 33,595,788  | 67,781       | rs17013001 | rs4670648  | 50            | 3    |
| 1        | Control      | Male        | 2   | 44,360,717  | 44,432,402  | 71,686       | rs10194161 | rs11680553 | 13            | 1    |
| 1        | Case         | Female      | 2   | 50,735,657  | 50,800,548  | 64,892       | rs1518551  | rs17501747 | 26            | 1    |
| 1        | Control      | Female      | 2   | 55,152,021  | 55,212,659  | 60,639       | rs2920881  | rs2968800  | 21            | 3    |
| 2        | Case.Control | Male.Female | 2   | 60,856,697  | 60,952,146  | 95,450       | rs11687809 | rs842624   | 20            | 3    |
| 1        | Control      | Female      | 2   | 61,068,848  | 61,121,796  | 52,949       | rs7564317  | rs2698189  | 13            | 3    |
| 1        | Case         | Female      | 2   | 74,819,098  | 74,895,392  | 76,295       | rs7564471  | rs596064   | 18            | 3    |
| 1        | Case         | Male        | 2   | 75,290,690  | 75,366,176  | 75,487       | rs4853122  | rs2192926  | 25            | 1    |
| 1        | Case         | Male        | 2   | 80,218,805  | 80,269,145  | 50,341       | rs11685504 | rs1530397  | 11            | 1    |
| 1        | Case         | Male        | 2   | 84,877,865  | 84,949,992  | 72,128       | rs1192396  | rs1000919  | 16            | 1    |
| 1        | Control      | Female      | 2   | 105,103,586 | 105,164,724 | 61,139       | rs3923277  | rs2679851  | 28            | 1    |
| 1        | Control      | Female      | 2   | 106,468,850 | 106,556,951 | 88,102       | rs4362555  | rs11124120 | 17            | 3    |
| 1        | Case         | Female      | 2   | 110,243,431 | 110,339,819 | 96,389       | rs3789735  | rs13386516 | 12            | 1    |
| 1        | Control      | Male        | 2   | 127,426,862 | 127,493,570 | 66,709       | rs11887389 | rs934827   | 19            | 3    |
| 1        | Case         | Male        | 2   | 176,907,092 | 176,968,345 | 61,254       | rs2689951  | rs7604433  | 10            | 1    |
| 1        | Control      | Female      | 2   | 179,853,779 | 179,941,872 | 88,094       | rs1907423  | rs7586173  | 43            | 3    |
| 1        | Case         | Female      | 2   | 197,857,012 | 197,940,884 | 83,873       | rs12619296 | rs788008   | 11            | 3    |
| 1        | Case         | Male        | 2   | 212,405,787 | 212,460,438 | 54,652       | rs16846917 | rs6727114  | 15            | 1    |
| 1        | Case         | Male        | 2   | 230,722,749 | 230,807,448 | 84,700       | rs4973275  | rs11687292 | 39            | 1    |
| 1        | Case         | Female      | 2   | 230,755,889 | 230,822,375 | 66,487       | rs10755048 | rs9989899  | 20            | 3    |
| 5        | Case.Control | Male.Female | 2   | 241,272,567 | 241,353,054 | 80,488       | rs4676385  | rs11690282 | 18            | 3    |
| 2        | All cases    | All male    | 2   | 241,272,567 | 241,371,118 | 98,552       | rs4676385  | rs2288750  | 20            | 3    |
| 38       | Case.Control | Male.Female | 2   | 242,565,979 | 242,656,041 | 90,063       | rs12987376 | rs6740738  | 16            | 1    |

## Chromosome 3

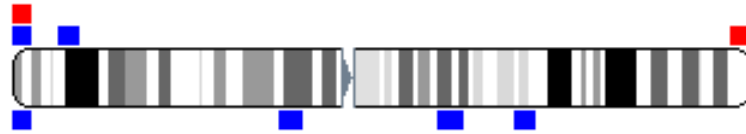

| #<br>Ids | Status              | Gender             | Band<br>position          | Bp Start           | Bp End             | Bp<br>Length     | Rs Start         | Rs End           | # Del<br>SNPs | Type       |
|----------|---------------------|--------------------|---------------------------|--------------------|--------------------|------------------|------------------|------------------|---------------|------------|
| 1        | Control             | Male               | 3p26.3                    | 135,814            | 235,896            | 100,083          | rs1568086        | rs11721252       | 42            | 3          |
| <b>3</b> | <b>Case.Control</b> | <b>Male.Female</b> | <b>3p26.3</b>             | <b>353,069</b>     | <b>1,635,507</b>   | <b>1,282,438</b> | <b>rs7649544</b> | <b>rs377914</b>  | ..            | <b>3.1</b> |
| 1        | Case                | Female             | 3p26.3                    | 915,698            | 1,251,092          | 335,395          | rs2313182        | rs11925058       | 118           | 1          |
| 1        | Case                | Male               | 3p26.3                    | 2,125,400          | 2,406,546          | 281,147          | rs2729005        | rs1604553        | 117           | 1          |
| 6        | Case.Control        | Male.Female        | 3p26.2                    | 3,827,866          | 4,315,847          | 487,981          | rs9850004        | rs310709         | ..            | 1          |
| 1        | Case                | Male               | 3p25.3                    | 9,154,971          | 9,454,142          | 299,172          | rs2675187        | rs2442825        | 99            | 3          |
| 2        | Case.Control        | All female         | 3p25.2                    | 11,738,001         | 12,031,308         | 293,307          | rs11128570       | rs6776447        | ..            | 3          |
| <b>1</b> | <b>Case</b>         | <b>Male</b>        | <b>3p24.3</b>             | <b>16,158,866</b>  | <b>16,807,832</b>  | <b>648,967</b>   | <b>rs7642249</b> | <b>rs6442641</b> | <b>206</b>    | <b>3</b>   |
| 7        | Case.Control        | Male.Female        | 3p22.3                    | 35,798,283         | 35,913,799         | 115,516          | rs3772397        | rs10049409       | 16            | 3          |
| 1        | Control             | Male               | 3p14.2                    | 63,160,790         | 63,572,155         | 411,366          | rs4234674        | rs6796563        | 155           | 3          |
| <b>1</b> | <b>Control</b>      | <b>Male</b>        | <b>3p12.3</b>             | <b>76,254,922</b>  | <b>77,652,511</b>  | <b>1,397,590</b> | <b>rs1400237</b> | <b>rs1447846</b> | <b>298</b>    | <b>3</b>   |
| <b>1</b> | <b>Control</b>      | <b>Female</b>      | <b>3q13.31-<br/>13.33</b> | <b>118,667,838</b> | <b>120,755,573</b> | <b>2,087,736</b> | <b>rs1698042</b> | <b>rs626364</b>  | <b>434</b>    | <b>3</b>   |
| <b>1</b> | <b>Control</b>      | <b>Female</b>      | <b>3q22.3</b>             | <b>139,634,661</b> | <b>140,367,414</b> | <b>732,754</b>   | <b>rs1679153</b> | <b>rs7626828</b> | <b>77</b>     | <b>3</b>   |
| 2        | All controls        | All female         | 3q24                      | 146,962,467        | 147,235,163        | 272,697          | rs16857208       | rs16857836       | 61            | 1          |
| 1        | Case                | Male               | 3q25.1                    | 151,958,110        | 152,077,375        | 119,266          | rs1148369        | rs574445         | 19            | 3          |
| 1        | Case                | Male               | 3q25.1                    | 152,935,130        | 153,037,439        | 102,310          | rs1520132        | rs6440788        | 27            | 1          |
| 1        | Case                | Male               | 3q26.1                    | 168,700,658        | 168,806,403        | 105,746          | rs13060964       | rs9837095        | 14            | 1          |
| 1        | Case                | Male               | 3q26.32                   | 178,039,364        | 178,352,192        | 312,829          | rs9874964        | rs6443429        | 72            | 3          |
| <b>1</b> | <b>Case</b>         | <b>Female</b>      | <b>3q29</b>               | <b>197,219,312</b> | <b>198,828,573</b> | <b>1,609,262</b> | <b>rs6797622</b> | <b>rs9917735</b> | <b>262</b>    | <b>1</b>   |
| 1        | Case                | Male               | 3q29                      | 198,610,700        | 198,828,573        | 217,874          | rs7645524        | rs9917735        | 56            | 3          |

## CNVs 50 – 100 kb

| #<br>Ids | Status       | Gender      | Chr | Bp Start    | Bp End      | Bp<br>Length | Rs Start   | Rs End     | # Del<br>SNPs | Type |
|----------|--------------|-------------|-----|-------------|-------------|--------------|------------|------------|---------------|------|
| 1        | Case         | Female      | 3   | 2,187,318   | 2,237,692   | 50,375       | rs2728524  | rs1523314  | 21            | 3    |
| 3        | Case.Control | Male.Female | 3   | 2,494,703   | 2,559,376   | 64,674       | rs17014863 | rs7649181  | 25            | 1    |
| 1        | Control      | Male        | 3   | 2,702,523   | 2,801,568   | 99,046       | rs1914009  | rs956764   | 56            | 3    |
| 1        | Control      | Male        | 3   | 11,846,215  | 11,907,455  | 61,241       | rs11551661 | rs9869051  | 21            | 1    |
| 1        | Case         | Male        | 3   | 43,260,400  | 43,343,677  | 83,278       | rs1320158  | rs17406718 | 10            | 3    |
| 1        | Case         | Male        | 3   | 57,954,807  | 58,013,383  | 58,577       | rs1098018  | rs12634644 | 14            | 3    |
| 1        | Case         | Male        | 3   | 62,723,037  | 62,807,270  | 84,234       | rs1849473  | rs514606   | 35            | 1    |
| 5        | All cases    | Male.Female | 3   | 101,833,435 | 101,916,282 | 82,848       | rs1144125  | rs591728   | 13            | 3    |
| 1        | Control      | Female      | 3   | 120,188,854 | 120,284,544 | 95,691       | rs1016284  | rs16829334 | 16            | 3    |
| 6        | All cases    | All male    | 3   | 120,211,804 | 120,284,544 | 72,741       | rs1369582  | rs16829334 | 14            | 3    |
| 1        | Control      | Male        | 3   | 152,944,075 | 153,037,439 | 93,365       | rs10513418 | rs6440788  | 26            | 1    |
| 1        | Case         | Female      | 3   | 152,970,596 | 153,056,976 | 86,381       | rs11924077 | rs10804755 | 23            | 1    |
| 1        | Case         | Female      | 3   | 152,976,373 | 153,067,347 | 90,975       | rs6787192  | rs9823831  | 23            | 1    |
| 1        | Case         | Male        | 3   | 152,992,947 | 153,056,976 | 64,030       | rs6440786  | rs10804755 | 15            | 1    |
| 1        | Case         | Male        | 3   | 152,997,280 | 153,056,976 | 59,697       | rs17204697 | rs10804755 | 13            | 1    |
| 1        | Case         | Female      | 3   | 156,948,185 | 157,029,968 | 81,784       | rs358742   | rs382534   | 17            | 1    |
| 1        | Case         | Female      | 3   | 192,522,868 | 192,582,767 | 59,900       | rs4677722  | rs389765   | 29            | 3    |
| 1        | Control      | Male        | 3   | 199,219,277 | 199,298,372 | 79,096       | rs7648906  | rs9879842  | 11            | 3    |

## Chromosome 4

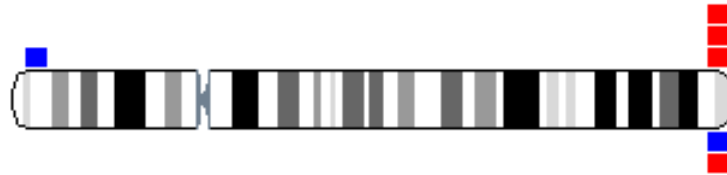

| #<br>Ids | Status              | Gender             | Band<br>position | Bp Start           | Bp End             | Bp<br>Length     | Rs Start         | Rs End            | # Del<br>SNPs | Type       |
|----------|---------------------|--------------------|------------------|--------------------|--------------------|------------------|------------------|-------------------|---------------|------------|
| 1        | Case                | Female             | 4p16.1           | 5,737,825          | 5,845,805          | 107,981          | rs957727         | rs6826372         | 61            | 1          |
| <b>1</b> | <b>Case</b>         | <b>Female</b>      | <b>4p16.1</b>    | <b>7,287,993</b>   | <b>7,806,279</b>   | <b>518,287</b>   | <b>rs1875341</b> | <b>rs17466860</b> | <b>260</b>    | <b>3</b>   |
| 1        | Control             | Female             | 4p16.1           | 9,433,717          | 9,540,060          | 106,344          | rs11938128       | rs881971          | 44            | 3          |
| 1        | Case                | Female             | 4p14-13          | 40,672,691         | 40,914,549         | 241,859          | rs12511584       | rs6811777         | 64            | 3          |
| 1        | Control             | Male               | 4q13.3           | 74,039,112         | 74,258,327         | 219,216          | rs11733810       | rs10035001        | 28            | 3          |
| 1        | Control             | Male               | 4q13.3           | 75,619,179         | 75,774,745         | 155,567          | rs1994941        | rs4333264         | 23            | 1          |
| 1        | Control             | Female             | 4q24             | 107,507,898        | 107,614,425        | 106,528          | rs2949646        | rs10516535        | 17            | 3          |
| 1        | Case                | Female             | 4q25             | 110,249,859        | 110,364,767        | 114,909          | rs4368681        | rs17040097        | 23            | 1          |
| 1        | Case                | Male               | 4q28.1           | 125,773,305        | 126,258,785        | 485,481          | rs12504009       | rs3956574         | 108           | 1          |
| 1        | Case                | Male               | 4q28.2           | 129,993,825        | 130,147,254        | 153,430          | rs6847753        | rs2044523         | 25            | 3          |
| 4        | Case.Control        | Male.Female        | 4q28.3           | 135,125,711        | 135,396,155        | 270,445          | rs4446382        | rs6822094         | 34            | 1          |
| 1        | Control             | Male               | 4q31.1           | 140,709,541        | 140,816,502        | 106,962          | rs1026047        | rs8192049         | 44            | 3          |
| 1        | Case                | Male               | 4q32.1           | 157,747,697        | 158,063,231        | 315,535          | rs939688         | rs10010472        | 54            | 1          |
| 1        | Case                | Male               | 4q32.2           | 162,664,217        | 162,819,468        | 155,252          | rs13135134       | rs4532194         | 32            | 1          |
| 1        | Control             | Female             | 4q32.3           | 165,179,254        | 165,388,371        | 209,118          | rs4533720        | rs4561891         | 50            | 1          |
| 8        | Case.Control        | Male.Female        | 4q32.3           | 169,051,922        | 169,298,002        | 246,081          | rs9994795        | rs4692861         | 60            | 1.3        |
| 1        | Case                | Male               | 4q34.1           | 175,712,054        | 175,847,125        | 135,072          | rs2877818        | rs1471817         | 41            | 3          |
| 1        | Case                | Female             | 4q34.2           | 177,243,037        | 177,348,934        | 105,898          | rs12641442       | rs4690667         | 14            | 1          |
| 1        | Control             | Male               | 4q35.2           | 187,566,239        | 187,766,898        | 200,660          | rs2167370        | rs11941966        | 57            | 3          |
| <b>5</b> | <b>Case.Control</b> | <b>Male.Female</b> | <b>4q35.2</b>    | <b>188,329,837</b> | <b>191,164,126</b> | <b>2,834,289</b> | <b>rs4862782</b> | <b>rs13120250</b> | <b>..</b>     | <b>1.3</b> |
| 1        | Control             | Male               | 4q35.2           | 188,927,301        | 189,222,487        | 295,187          | rs13148546       | rs11132507        | 56            | 3          |

**CNVs 50 – 100 kb**

| #<br>Ids | Status       | Gender      | Chr | Bp Start    | Bp End      | Bp<br>Length | Rs Start   | Rs End     | # Del<br>SNPs | Type |
|----------|--------------|-------------|-----|-------------|-------------|--------------|------------|------------|---------------|------|
| 1        | Case         | Male        | 4   | 70,522,949  | 70,585,964  | 63,016       | rs11249452 | rs4694234  | 17            | 1    |
| 1        | Case         | Male        | 4   | 87,987,541  | 88,082,794  | 95,254       | rs13149938 | rs6836128  | 13            | 3    |
| 1        | Case         | Male        | 4   | 91,895,424  | 91,983,955  | 88,532       | rs6833239  | rs6822939  | 20            | 3    |
| 1        | Control      | Female      | 4   | 92,408,613  | 92,489,733  | 81,121       | rs7694618  | rs6841781  | 20            | 3    |
| 2        | All controls | Male.Female | 4   | 114,955,716 | 115,035,923 | 80,208       | rs4446309  | rs7674158  | 20            | 1    |
| 1        | Case         | Female      | 4   | 130,080,159 | 130,159,225 | 79,067       | rs13149221 | rs172168   | 14            | 1    |
| 1        | Case         | Male        | 4   | 147,428,854 | 147,514,578 | 85,725       | rs13140054 | rs2679144  | 14            | 3    |
| 1        | Case         | Male        | 4   | 156,894,819 | 156,954,889 | 60,071       | rs6838946  | rs17033585 | 15            | 3    |
| 1        | Case         | Male        | 4   | 164,154,058 | 164,232,351 | 78,294       | rs6536694  | rs11100479 | 15            | 3    |

## Chromosome 5

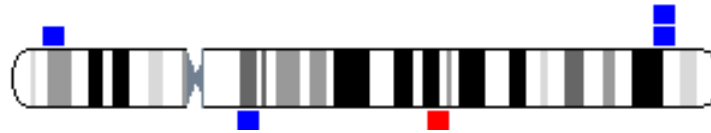

| #<br>Ids | Status           | Gender          | Band<br>position | Bp Start           | Bp End             | Bp<br>Length   | Rs Start          | Rs End            | # Del<br>SNPs | Type     |
|----------|------------------|-----------------|------------------|--------------------|--------------------|----------------|-------------------|-------------------|---------------|----------|
| 1        | Control          | Male            | 5p15.33          | 80,564             | 196,534            | 115,971        | rs2135917         | rs13436090        | 15            | 3        |
| <b>1</b> | <b>Case</b>      | <b>Female</b>   | <b>5p15.2</b>    | <b>10,307,117</b>  | <b>11,217,361</b>  | <b>910,245</b> | <b>rs2259642</b>  | <b>rs721768</b>   | <b>253</b>    | <b>3</b> |
| 1        | Case             | Male            | 5p14.2           | 23,425,010         | 23,920,197         | 495,188        | rs6861038         | rs1490758         | 76            | 3        |
| 1        | Control          | Male            | 5p13.2           | 34,889,541         | 34,996,272         | 106,732        | rs4703480         | rs7719119         | 24            | 3        |
| 1        | Case             | Female          | 5p13.2           | 36,245,985         | 36,348,269         | 102,285        | rs6881555         | rs1500218         | 24            | 3        |
| 1        | Case             | Male            | 5p13.2-13.1      | 38,326,071         | 38,539,215         | 213,145        | rs2042925         | rs3797161         | 64            | 3        |
| 1        | Control          | Female          | 5q11.2           | 58,661,886         | 58,781,629         | 119,744        | rs35255           | rs1457110         | 51            | 1        |
| <b>1</b> | <b>Control</b>   | <b>Female</b>   | <b>5q12.1</b>    | <b>61,453,953</b>  | <b>62,068,872</b>  | <b>614,920</b> | <b>rs2910469</b>  | <b>rs16890998</b> | <b>75</b>     | <b>3</b> |
| 1        | Case             | Female          | 5q14.3           | 90,009,377         | 90,254,368         | 244,992        | rs1033290         | rs3114653         | 58            | 1        |
| 1        | Control          | Male            | 5q15             | 93,574,633         | 93,898,701         | 324,069        | rs13163610        | rs6556847         | 54            | 1        |
| 1        | Control          | Female          | 5q21.1           | 102,188,684        | 102,461,308        | 272,625        | rs258247          | rs34813           | 31            | 1        |
| 4        | Case.Control     | Male.Female     | 5q21-21.3        | 104,410,795        | 104,562,047        | 151,253        | rs6872400         | rs974244          | 28            | 1        |
| <b>1</b> | <b>Control</b>   | <b>Male</b>     | <b>5q22.1</b>    | <b>109,730,387</b> | <b>110,330,169</b> | <b>599,783</b> | <b>rs17132029</b> | <b>rs1366331</b>  | <b>69</b>     | <b>1</b> |
| 1        | Case             | Male            | 5q22.1           | 109,783,199        | 110,084,156        | 300,958        | rs311696          | rs151784          | 31            | 1        |
| 1        | Control          | Male            | 5q33.3           | 157,105,919        | 157,352,660        | 246,742        | rs6895563         | rs11135023        | 58            | 3        |
| <b>2</b> | <b>All cases</b> | <b>All male</b> | <b>5q35.1,</b>   | <b>168,385,055</b> | <b>169,072,475</b> | <b>687,421</b> | <b>rs6890327</b>  | <b>rs17736882</b> | <b>198</b>    | <b>3</b> |
| 1        | Control          | Female          | 5q35.3           | 177,288,649        | 177,456,843        | 168,195        | rs4298268         | rs12652932        | 29            | 3        |
| 1        | Control          | Female          | 5q35.3           | 177,771,474        | 177,932,053        | 160,580        | rs11746864        | rs262065          | 61            | 3        |
| 1        | Control          | Male            | 5q35.3           | 180,441,221        | 180,623,543        | 182,323        | rs13167249        | rs1279912         | 40            | 3        |

**CNVs 50 – 100 kb**

| #<br>Ids | Status       | Gender      | Chr | Bp Start    | Bp End      | Bp<br>Length | Rs Start   | Rs End     | # Del<br>SNPs | Type |
|----------|--------------|-------------|-----|-------------|-------------|--------------|------------|------------|---------------|------|
| 1        | Control      | Female      | 5   | 647,083     | 738,748     | 91,666       | rs11739663 | rs386057   | 17            | 3    |
| 1        | Control      | Male        | 5   | 1,204,161   | 1,260,527   | 56,367       | rs3922757  | rs6554660  | 13            | 4    |
| 1        | Case         | Male        | 5   | 1,395,714   | 1,448,077   | 52,364       | rs31489    | rs40184    | 14            | 3    |
| 1        | Control      | Female      | 5   | 33,612,359  | 33,698,773  | 86,415       | rs3813474  | rs12516835 | 41            | 3    |
| 3        | Case.Control | Male.Female | 5   | 59,758,639  | 59,809,368  | 50,730       | rs37692    | rs1423473  | 17            | 3    |
| 1        | Case         | Female      | 5   | 90,215,480  | 90,294,340  | 78,861       | rs6893164  | rs12522571 | 22            | 1    |
| 1        | Case         | Female      | 5   | 104,460,010 | 104,514,704 | 54,695       | rs10057612 | rs7701212  | 11            | 1    |
| 16       | Case.Control | Male.Female | 5   | 104,460,010 | 104,518,786 | 58,777       | rs10057612 | rs10043572 | 12            | 1    |
| 1        | Case         | Male        | 5   | 107,276,507 | 107,333,438 | 56,932       | rs1433050  | rs6867577  | 29            | 1    |
| 1        | Case         | Male        | 5   | 109,723,958 | 109,814,957 | 91,000       | rs6594447  | rs11748623 | 16            | 1    |
| 1        | Control      | Male        | 5   | 110,862,078 | 110,923,874 | 61,797       | rs2059041  | rs247544   | 14            | 1    |
| 1        | Case         | Female      | 5   | 115,569,462 | 115,637,451 | 67,990       | rs6896019  | rs10071906 | 11            | 1    |
| 1        | Case         | Male        | 5   | 151,260,601 | 151,337,257 | 76,657       | rs2964607  | rs426783   | 20            | 3    |
| 1        | Case         | Female      | 5   | 151,269,891 | 151,337,257 | 67,367       | rs1465555  | rs426783   | 19            | 3    |



## Chromosome 6

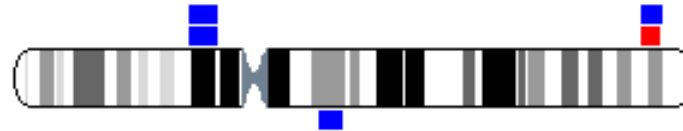

| #<br>Ids | Status           | Gender          | Band<br>position | Bp Start           | Bp End             | Bp<br>Length     | Rs Start          | Rs End           | # Del<br>SNPs | Type     |
|----------|------------------|-----------------|------------------|--------------------|--------------------|------------------|-------------------|------------------|---------------|----------|
| 1        | Control          | Female          | 6p22.3           | 17,696,137         | 17,872,258         | 176,122          | rs942465          | rs1044654        | 27            | 3        |
| 1        | Case             | Male            | 6p21.32          | 32,677,669         | 32,785,890         | 108,222          | rs477515          | rs9275563        | 60            | 1        |
| 1        | Control          | Female          | 6p21.31          | 34,836,231         | 35,001,376         | 165,146          | rs9462014         | rs2504163        | 20            | 3        |
| 2        | All cases        | Male.Female     | 6p21.2           | 38,621,152         | 39,148,632         | 527,480          | rs27478156        | rs2235868        | ..            | 1        |
| <b>2</b> | <b>All cases</b> | <b>All male</b> | <b>6p12.3</b>    | <b>47,748,056</b>  | <b>50,454,502</b>  | <b>2,706,446</b> | <b>rs869002</b>   | <b>rs1492612</b> | <b>..</b>     | <b>3</b> |
| 1        | Case             | Male            | 6p12.3           | 47,927,523         | 48,176,833         | 249,311          | rs564351          | rs10948397       | 48            | 3        |
| 2        | All cases        | Male.Female     | 6q12             | 66,025,960         | 66,203,540         | 177,581          | rs536372          | rs12192936       | 38            | 1        |
| <b>1</b> | <b>Control</b>   | <b>Female</b>   | <b>6q14.1</b>    | <b>80,936,857</b>  | <b>81,764,229</b>  | <b>827,373</b>   | <b>rs6931421</b>  | <b>rs7744074</b> | <b>157</b>    | <b>3</b> |
| 2        | All cases        | All male        | 6q14.1           | 82,839,391         | 82,940,555         | 101,165          | rs7454792         | rs197246         | 24            | 3        |
| 1        | Control          | Female          | 6q21             | 106,683,679        | 106,930,232        | 246,554          | rs7761791         | rs3851212        | 57            | 3        |
| 1        | Case             | Male            | 6q22.31          | 119,023,320        | 119,138,872        | 115,553          | rs13220480        | rs11153771       | 26            | 3        |
| 1        | Case             | Male            | 6q22.31          | 125,063,391        | 125,214,187        | 150,797          | rs9388359         | rs1409294        | 47            | 3        |
| 1        | Case             | Male            | 6q22.33          | 129,410,496        | 129,555,141        | 144,646          | rs11154461        | rs9492268        | 25            | 1        |
| 1        | Control          | Male            | 6q23.2           | 131,771,552        | 131,939,901        | 168,350          | rs9483275         | rs2246012        | 36            | 3        |
| 1        | Case             | Male            | 6q23.3           | 135,889,916        | 136,079,920        | 190,005          | rs9389295         | rs6930057        | 27            | 3        |
| 1        | Case             | Male            | 6q26             | 161,600,834        | 161,734,897        | 134,064          | rs3823058         | rs12210160       | 38            | 4        |
| <b>1</b> | <b>Case</b>      | <b>Male</b>     | <b>6q26</b>      | <b>161,988,422</b> | <b>162,491,345</b> | <b>502,924</b>   | <b>rs10945764</b> | <b>rs713054</b>  | <b>178</b>    | <b>1</b> |
| 2        | All controls     | All female      | 6q26             | 162,379,561        | 162,611,408        | 231,848          | rs7738197         | rs11966606       | 90            | 1        |
| <b>1</b> | <b>Case</b>      | <b>Male</b>     | <b>6q26</b>      | <b>162,591,329</b> | <b>163,106,351</b> | <b>515,023</b>   | <b>rs7770626</b>  | <b>rs4709649</b> | <b>148</b>    | <b>3</b> |
| 15       | Case.Control     | Male.Female     | 6q26             | 162,622,524        | 163,119,757        | 497,233          | rs9365397         | rs13202401       | ..            | 3.1      |
| 2        | All controls     | Male.Female     | 6q27             | 167,524,137        | 167,690,726        | 166,589          | rs6904892         | rs2981988        | ..            | 3        |
| 42       | Case.Control     | Male.Female     | 6q27             | 168,078,929        | 168,781,519        | 702,590          | rs3800533         | rs4708481        | ..            | 3        |

**CNVs 50 – 100 kb**

| #<br>Ids | Status       | Gender      | Chr | Bp Start    | Bp End      | Bp<br>Length | Rs Start   | Rs End     | # Del<br>SNPs | Type |
|----------|--------------|-------------|-----|-------------|-------------|--------------|------------|------------|---------------|------|
| 1        | Case         | Male        | 6   | 2,154,576   | 2,227,746   | 73,171       | rs234915   | rs12664420 | 16            | 3    |
| 1        | Case         | Female      | 6   | 10,572,011  | 10,636,780  | 64,770       | rs501436   | rs560194   | 40            | 1    |
| 1        | Case         | Male        | 6   | 10,575,681  | 10,636,780  | 61,100       | rs796102   | rs560194   | 38            | 1    |
| 2        | Case.Control | All males   | 6   | 10,577,812  | 10,636,780  | 58,969       | rs645297   | rs560194   | 36            | 1    |
| 1        | Control      | Female      | 6   | 10,577,812  | 10,640,172  | 62,361       | rs645297   | rs681282   | 37            | 1    |
| 5        | Case.Control | Male.Female | 6   | 31,468,368  | 31,559,455  | 91,088       | rs2523477  | rs2905747  | 66            | 3.1  |
| 1        | Case         | Male        | 6   | 35,610,180  | 35,670,618  | 60,439       | rs9380516  | rs3798346  | 12            | 3    |
| 1        | Control      | Female      | 6   | 38,398,246  | 38,450,140  | 51,895       | rs16890552 | rs4711542  | 14            | 1    |
| 1        | Case         | Male        | 6   | 44,971,084  | 45,054,441  | 83,358       | rs7754378  | rs2396369  | 18            | 3    |
| 1        | Control      | Female      | 6   | 62,683,938  | 62,740,028  | 56,091       | rs16900602 | rs1516709  | 16            | 3    |
| 1        | Case         | Male        | 6   | 65,996,954  | 66,065,824  | 68,871       | rs2788907  | rs9354219  | 14            | 1    |
| 1        | Case         | Female      | 6   | 89,348,510  | 89,417,599  | 69,090       | rs1923416  | rs2756382  | 14            | 3    |
| 1        | Control      | Female      | 6   | 119,104,805 | 119,157,274 | 52,470       | rs13214017 | rs12190347 | 21            | 1    |
| 3        | Case.Control | All males   | 6   | 124,313,139 | 124,391,083 | 77,945       | rs235667   | rs17086515 | 30            | 1    |
| 1        | Case         | Male        | 6   | 161,521,152 | 161,597,624 | 76,473       | rs3798923  | rs3757031  | 33            | 3    |
| 1        | Case         | Male        | 6   | 161,848,346 | 161,904,684 | 56,339       | rs508605   | rs6909754  | 36            | 3    |
| 1        | Control      | Male        | 6   | 161,853,925 | 161,904,684 | 50,760       | rs16892673 | rs6909754  | 32            | 3    |
| 1        | Control      | Male        | 6   | 162,431,244 | 162,506,056 | 74,813       | rs9347586  | rs2849576  | 26            | 1    |
| 2        | All cases    | All males   | 6   | 162,824,155 | 162,886,421 | 62,267       | rs4493732  | rs2846463  | 20            | 1    |
| 1        | Control      | Female      | 6   | 162,852,454 | 162,951,722 | 99,269       | rs13194743 | rs9364667  | 31            | 1    |
| 1        | Case         | Male        | 6   | 168,224,721 | 168,316,008 | 91,288       | rs7753203  | rs4708679  | 49            | 3    |
| 1        | Control      | Female      | 6   | 168,229,155 | 168,316,008 | 86,854       | rs10455755 | rs4708679  | 48            | 3    |
| 1        | Control      | Male        | 6   | 168,588,370 | 168,660,249 | 71,880       | rs7741920  | rs2763239  | 23            | 1    |
| 1        | Case         | Female      | 6   | 169,768,336 | 169,833,634 | 65,299       | rs12111411 | rs7750758  | 12            | 1    |

## Chromosome 7

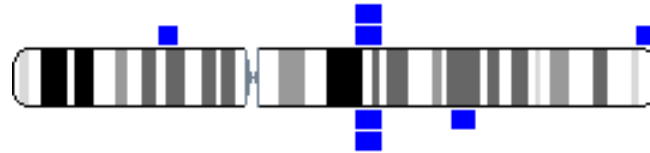

| #<br>Ids | Status              | Gender             | Band<br>position          | Bp Start           | Bp End             | Bp<br>Length     | Rs Start         | Rs End            | # Del<br>SNPs | Type     |
|----------|---------------------|--------------------|---------------------------|--------------------|--------------------|------------------|------------------|-------------------|---------------|----------|
| 1        | Case                | Male               | 7p22.2                    | 3,899,448          | 4,055,402          | 155,955          | rs6971828        | rs17134285        | 36            | 1        |
| 1        | Case                | Male               | 7p22.1                    | 5,361,477          | 5,506,484          | 145,008          | rs4724592        | rs7799622         | 27            | 3        |
| 1        | Case                | Male               | 7p22.1                    | 5,700,983          | 5,894,482          | 193,500          | rs1468996        | rs6463522         | 22            | 3        |
| 1        | Control             | Male               | 7p22.1-21.3               | 7,006,701          | 7,234,956          | 228,256          | rs4074751        | rs10259085        | 56            | 3        |
| 1        | Control             | Female             | 7p21.3                    | 8,151,486          | 8,480,452          | 328,967          | rs2110332        | rs1029523         | 112           | 3        |
| 1        | Case                | Female             | 7p21.2-21.1               | 15,091,272         | 15,384,424         | 293,153          | rs17168654       | rs4256491         | 74            | 3        |
| 1        | Case                | Male               | 7p21.1                    | 16,135,027         | 16,363,877         | 228,851          | rs10269890       | rs2178598         | 53            | 1        |
| 1        | Case                | Male               | 7p21.1                    | 17,047,682         | 17,396,529         | 348,848          | rs518136         | rs7777586         | 72            | 3        |
| 1        | Case                | Male               | 7p15.3                    | 20,517,504         | 20,619,778         | 102,275          | rs1012869        | rs12666732        | 36            | 1        |
| 1        | Case                | Male               | 7p15.2                    | 26,136,637         | 26,301,955         | 165,319          | rs2057761        | rs12538280        | 22            | 3        |
| <b>1</b> | <b>Case</b>         | <b>Male</b>        | <b>7p14.1</b>             | <b>39,260,567</b>  | <b>39,260,567</b>  | <b>500,800</b>   | <b>rs3779127</b> | <b>rs10242061</b> | <b>97</b>     | <b>3</b> |
| 3        | Case.Control        | Male.Female        | 7p14.1                    | 40,269,809         | 40,510,036         | 240,228          | rs6952552        | rs6947887         | 30            | 1        |
| 1        | Case                | Male               | 7p11.2-11.1               | 57,212,608         | 57,643,772         | 431,165          | rs13240443       | rs7801211         | 62            | 3        |
| 17       | Case.Control        | Male.Female        | 7q11.21                   | 64,316,996         | 64,593,616         | 276,621          | rs2900856        | rs10274919        | 29            | 3.1      |
| 1        | Control             | Male               | 7q11.22                   | 70,287,481         | 70,396,256         | 108,776          | rs1796089        | rs4719106         | 40            | 1        |
| 1        | Control             | Female             | 7q21.11                   | 80,110,504         | 80,326,004         | 215,501          | rs1527479        | rs10954378        | 48            | 3        |
| 1        | Control             | Female             | 7q21.12                   | 87,988,734         | 88,211,532         | 222,799          | rs916654         | rs2519910         | 43            | 3        |
| 1        | Control             | Female             | 7q21.13                   | 88,235,577         | 88,485,794         | 250,218          | rs7801611        | rs6944177         | 63            | 4        |
| <b>4</b> | <b>Case.Control</b> | <b>Male.Female</b> | <b>7q21.12-<br/>21.13</b> | <b>87,999,670</b>  | <b>89,718,885</b>  | <b>1,719,216</b> | <b>rs6977770</b> | <b>rs10240790</b> | <b>371</b>    | <b>3</b> |
| 1        | Control             | Male               | 7q21.13                   | 88,485,794         | 88,924,574         | 438,781          | rs6944177        | rs2373919         | 116           | 1        |
| 1        | Control             | Female             | 7q21.13                   | 89,395,484         | 89,547,717         | 152,234          | rs7801279        | rs10952990        | 45            | 1        |
| 3        | Case.Control        | Male.Female        | 7q21.3                    | 93,625,349         | 93,819,975         | 194,627          | rs7357193        | rs10464587        | 24            | 1        |
| 19       | Case.Control        | Male.Female        | 7q22.1                    | 100,715,342        | 100,914,175        | 198,834          | rs4727484        | rs13232646        | 35            | 3        |
| 1        | Case                | Female             | 7q22.1                    | 103,900,953        | 104,134,190        | 233,238          | rs6465992        | rs6952413         | 79            | 3        |
| 7        | Case.Control        | Male.Female        | 7q31.1                    | 110,810,558        | 111,138,748        | 328,190          | rs17158544       | rs10487331        | ..            | 1        |
| <b>1</b> | <b>Control</b>      | <b>Female</b>      | <b>7q31.1</b>             | <b>111,298,102</b> | <b>112,083,170</b> | <b>785,069</b>   | <b>rs739617</b>  | <b>rs1989835</b>  | <b>180</b>    | <b>3</b> |

|          |              |             |               |                    |                    |                |                   |                   |            |          |
|----------|--------------|-------------|---------------|--------------------|--------------------|----------------|-------------------|-------------------|------------|----------|
| 1        | Case         | Male        | 7q31.31-31.32 | 120,751,201        | 120,947,500        | 196,300        | rs3757552         | rs1881374         | 25         | 3        |
| 1        | Control      | Female      | 7q31.33       | 124,235,477        | 124,361,763        | 126,287        | rs2896359         | rs10264288        | 28         | 1        |
| 1        | Case         | Male        | 7q33          | 133,137,377        | 133,270,514        | 133,138        | rs10488174        | rs4731986         | 18         | 1        |
| 1        | Case         | Female      | 7q33          | 133,397,304        | 133,501,403        | 104,100        | rs4731997         | rs728579          | 18         | 1        |
| 2        | All controls | All male    | 7q33          | 136,653,944        | 136,987,112        | 333,168        | rs322335          | rs10273400        | ..         | 3        |
| 1        | Case         | Female      | 7q35          | 143,206,916        | 143,505,123        | 298,208        | rs11768025        | rs10487624        | 54         | 3        |
| 1        | Control      | Male        | 7q35          | 143,705,862        | 143,810,267        | 104,406        | rs720475          | rs10255314        | 29         | 3        |
| 2        | All Cases    | All female  | 7q35          | 145,884,986        | 146,359,185        | 474,199        | rs9640471         | rs1524347         | ..         | 1        |
| 3        | Case.Control | Male.Female | 7q36.2        | 152,961,994        | 153,239,054        | 277,061        | rs4595033         | rs12673076        | 32         | 3        |
| <b>1</b> | <b>Case</b>  | <b>Male</b> | <b>7q36.3</b> | <b>156,775,368</b> | <b>157,674,626</b> | <b>899,259</b> | <b>rs12533310</b> | <b>rs10244830</b> | <b>209</b> | <b>3</b> |

## CNVs 50 – 100 kb

| # Ids | Status       | Gender      | Chr | Bp Start    | Bp End      | Bp Length | Rs Start   | Rs End     | # Del SNPs | Type |
|-------|--------------|-------------|-----|-------------|-------------|-----------|------------|------------|------------|------|
| 1     | Case         | Male        | 7   | 3,656,098   | 3,710,081   | 53,984    | rs2614956  | rs10256504 | 25         | 1    |
| 1     | Case         | Male        | 7   | 11,314,044  | 11,370,519  | 56,476    | rs2189344  | rs10257877 | 20         | 3    |
| 1     | Case         | Male        | 7   | 17,914,612  | 17,974,835  | 60,224    | rs17138418 | rs4470902  | 15         | 3    |
| 2     | Case.Control | All males   | 7   | 38,254,795  | 38,309,522  | 54,728    | rs2240825  | rs2392545  | 19         | 1    |
| 1     | Control      | Female      | 7   | 38,254,795  | 38,341,222  | 86,428    | rs2240825  | rs2240853  | 47         | 1    |
| 1     | Control      | Female      | 7   | 38,285,115  | 38,337,999  | 52,885    | rs7782269  | rs2534575  | 44         | 1    |
| 1     | Control      | Female      | 7   | 38,285,115  | 38,340,056  | 54,942    | rs7782269  | rs2534578  | 45         | 1    |
| 1     | Case         | Male        | 7   | 38,285,115  | 38,341,222  | 56,108    | rs7782269  | rs2240853  | 46         | 1    |
| 2     | All cases    | All males   | 7   | 38,285,115  | 38,346,971  | 61,857    | rs7782269  | rs733905   | 47         | 1    |
| 1     | Case         | Male        | 7   | 88,459,393  | 88,521,153  | 61,761    | rs10486891 | rs967579   | 14         | 3    |
| 1     | Case         | Male        | 7   | 110,509,036 | 110,563,273 | 54,238    | rs214897   | rs12705757 | 10         | 1    |
| 1     | Case         | Male        | 7   | 110,563,273 | 110,645,504 | 82,232    | rs12705757 | rs214467   | 20         | 1    |
| 1     | Control      | Female      | 7   | 110,944,768 | 111,034,187 | 89,420    | rs2613589  | rs2613611  | 17         | 1    |
| 1     | Case         | Female      | 7   | 111,027,549 | 111,116,572 | 89,024    | rs11979526 | rs10236334 | 16         | 1    |
| 3     | Case.Control | Male.Female | 7   | 117,704,955 | 117,804,083 | 99,129    | rs41923    | rs2189127  | 24         | 1    |
| 1     | Case         | Female      | 7   | 119,885,540 | 119,967,907 | 82,368    | rs7809257  | rs10488302 | 16         | 1    |
| 1     | Case         | Female      | 7   | 136,654,649 | 136,753,038 | 98,390    | rs322334   | rs1647189  | 22         | 3    |
| 1     | Case         | Male        | 7   | 146,168,694 | 146,222,821 | 54,128    | rs11984177 | rs10216156 | 25         | 1    |
| 1     | Case         | Male        | 7   | 157,223,935 | 157,317,812 | 93,878    | rs867923   | rs9654707  | 25         | 3    |
| 1     | Control      | Female      | 7   | 157,427,075 | 157,495,433 | 68,359    | rs920023   | rs1001099  | 26         | 3    |

## Chromosome 8

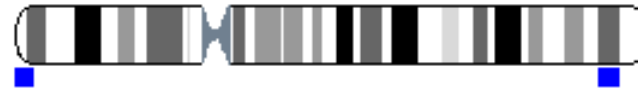

| #<br>Ids | Status         | Gender        | Band<br>position   | Bp Start           | Bp End             | Bp<br>Length   | Rs Start          | Rs End            | # Del<br>SNPs | Type     |
|----------|----------------|---------------|--------------------|--------------------|--------------------|----------------|-------------------|-------------------|---------------|----------|
| 2        | Case.Control   | All male      | 8p23.3             | 1,016,907          | 1,413,906          | 396,999        | rs2123055         | rs1468415         | ..            | 3.1      |
| <b>1</b> | <b>Control</b> | <b>Female</b> | <b>8p23.3-23.2</b> | <b>1,764,978</b>   | <b>2,309,171</b>   | <b>544,194</b> | <b>rs17064297</b> | <b>rs17063040</b> | <b>258</b>    | <b>3</b> |
| 2        | All cases      | All male      | 8p23.3             | 1,776,764          | 1,975,127          | 198,363        | rs11136430        | rs7006192         | ..            | 3        |
| 2        | All cases      | All male      | 8p23.3             | 2,022,084          | 2,133,623          | 111,540        | rs10102743        | rs317223          | 95            | 3        |
| 1        | Case           | Male          | 8p23.2             | 4,297,110          | 4,433,352          | 136,243        | rs13278525        | rs2617078         | 88            | 1        |
| 5        | Case.Control   | Male.Female   | 8p23.2-23.1        | 6,116,236          | 6,324,795          | 208,559        | rs4841788         | rs17540702        | ..            | 3        |
| 3        | Case.Control   | All male      | 8p23.1             | 8,135,489          | 8,285,468          | 149,980        | Rs2955587         | Rs6601694         | 48            | 1        |
| 1        | Case           | Male          | 8p22               | 14,023,660         | 14,164,733         | 141,074        | rs17118702        | rs12541432        | 46            | 3        |
| 1        | Case           | Female        | 8p22-21.3          | 18,871,240         | 19,354,225         | 482,986        | rs17127550        | rs12677088        | 186           | 1        |
| 1        | Case           | Male          | 8p21.3             | 20,107,092         | 20,598,973         | 491,882        | rs10088108        | rs2597389         | 154           | 3        |
| 1        | Case           | Male          | 8q11.23            | 53,518,462         | 53,690,757         | 172,296        | rs6990326         | rs4637853         | 45            | 3        |
| 1        | Case           | Male          | 8q11.23            | 54,655,376         | 54,864,364         | 208,989        | rs1551910         | rs4737753         | 30            | 1        |
| 3        | Case.Control   | All male      | 8q12.1             | 56,874,267         | 57,038,773         | 164,506        | rs10109493        | rs907424          | ..            | 3        |
| 1        | Case           | Male          | 8q12.1             | 57,496,635         | 57,623,780         | 127,146        | rs17760660        | rs2610027         | 28            | 3        |
| 1        | Control        | Male          | 8q13.3             | 73,251,347         | 73,681,616         | 430,270        | rs7017623         | rs7009604         | 103           | 3        |
| 1        | Control        | Male          | 8q21.13            | 82,452,393         | 82,575,548         | 123,156        | rs1450790         | rs1304403         | 23            | 1        |
| 1        | Control        | Female        | 8q21.13            | 82,582,067         | 82,693,196         | 111,130        | rs1485999         | rs2955026         | 26            | 3        |
| 2        | Case.Control   | Male.Female   | 8q21.3             | 87,256,166         | 87,403,084         | 146,919        | rs6470428         | rs7017719         | 25            | 3        |
| 1        | Control        | Female        | 8q21.3             | 87,902,827         | 88,144,314         | 241,488        | rs10808349        | rs2974278         | 55            | 3        |
| 1        | Control        | Female        | 8q21.3             | 89,120,413         | 89,247,103         | 126,691        | rs2664370         | rs2681300         | 29            | 3        |
| 1        | Case           | Male          | 8q22.1             | 95,193,232         | 95,385,432         | 192,201        | rs4421324         | rs2515137         | 60            | 3        |
| 1        | Control        | Male          | 8q22.3             | 105,380,250        | 105,551,651        | 171,402        | rs2511628         | rs3750187         | 64            | 3        |
| 1        | Control        | Female        | 8q23.1             | 109,374,453        | 109,484,302        | 109,850        | rs6469170         | rs2023106         | 14            | 1        |
| 1        | Case           | Male          | 8q24.12            | 120,787,622        | 121,005,702        | 218,081        | rs6989251         | rs6469877         | 36            | 3        |
| 1        | Case           | Male          | 8q24.22            | 134,656,368        | 134,935,134        | 278,767        | rs1554324         | rs7845379         | 121           | 3        |
| 1        | Control        | Male          | 8q24.22            | 135,585,139        | 135,726,935        | 141,797        | rs894357          | rs17699546        | 66            | 1        |
| <b>1</b> | <b>Control</b> | <b>Female</b> | <b>8q24.23</b>     | <b>138,771,563</b> | <b>139,340,184</b> | <b>568,622</b> | <b>rs4389979</b>  | <b>rs16908717</b> | <b>192</b>    | <b>3</b> |

|   |         |        |        |             |             |         |           |           |    |   |
|---|---------|--------|--------|-------------|-------------|---------|-----------|-----------|----|---|
| 1 | Control | Female | 8q24.3 | 145,064,091 | 145,223,898 | 159,808 | rs6558406 | rs2070688 | 16 | 3 |
|---|---------|--------|--------|-------------|-------------|---------|-----------|-----------|----|---|

**CNVs 50 – 100 kb**

| #<br>Ids | Status       | Gender      | Chr | Bp Start    | Bp End      | Bp<br>Length | Rs Start   | Rs End     | # Del<br>SNPs | Type |
|----------|--------------|-------------|-----|-------------|-------------|--------------|------------|------------|---------------|------|
| 1        | Control      | Female      | 8   | 384,980     | 458,609     | 73,630       | rs17738097 | rs2121885  | 54            | 3    |
| 1        | Case         | Male        | 8   | 3,664,116   | 3,760,537   | 96,422       | rs9693433  | rs2688324  | 67            | 1    |
| 1        | Case         | Male        | 8   | 4,600,608   | 4,671,975   | 71,368       | rs4875115  | rs1379323  | 118           | 1    |
| 3        | All cases    | All males   | 8   | 15,917,140  | 15,980,161  | 63,022       | rs2898430  | rs10099900 | 24            | 3    |
| 15       | Case.Control | Male.Female | 8   | 15,994,142  | 16,065,839  | 71,698       | rs13280294 | rs351572   | 19            | 1    |
| 1        | Control      | Male        | 8   | 15,994,142  | 16,073,863  | 79,722       | rs13280294 | rs13251251 | 21            | 1    |
| 2        | All cases    | Male.Female | 8   | 17,602,799  | 17,665,222  | 62,424       | rs374386   | rs451322   | 30            | 1    |
| 1        | Case         | Male        | 8   | 27,365,256  | 27,460,271  | 95,016       | rs1106359  | rs2565050  | 38            | 3    |
| 1        | Case         | Male        | 8   | 53,986,757  | 54,054,751  | 67,995       | rs10504150 | rs2555186  | 19            | 3    |
| 1        | Case         | Male        | 8   | 56,920,362  | 57,013,973  | 93,612       | rs12155521 | rs1126327  | 27            | 3    |
| 1        | Case         | Male        | 8   | 56,963,551  | 57,038,773  | 75,223       | rs333616   | rs907424   | 27            | 3    |
| 1        | Control      | Female      | 8   | 82,939,617  | 83,001,525  | 61,909       | rs1451994  | rs11779650 | 13            | 3    |
| 1        | Case         | Male        | 8   | 87,256,166  | 87,319,087  | 62,922       | rs6470428  | rs4406372  | 18            | 3    |
| 1        | Case         | Male        | 8   | 95,744,548  | 95,798,679  | 54,132       | rs1895874  | rs9643347  | 15            | 3    |
| 1        | Control      | Female      | 8   | 109,374,453 | 109,466,087 | 91,635       | rs6469170  | rs10108399 | 10            | 1    |
| 1        | Control      | Male        | 8   | 121,556,228 | 121,640,447 | 84,220       | rs12386936 | rs4297067  | 13            | 3    |

**Chromosome 9**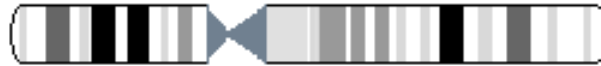

| #<br>Ids | Status       | Gender      | Band<br>position | Bp Start    | Bp End      | Bp<br>Length | Rs Start   | Rs End     | # Del<br>SNPs | Type |
|----------|--------------|-------------|------------------|-------------|-------------|--------------|------------|------------|---------------|------|
| 7        | Case.Control | Male.Female | 9p24.3           | 194,201     | 794,436     | 600,235      | rs10964134 | rs4742419  | ..            | 3    |
| 1        | Control      | Female      | 9p24.1           | 5,088,223   | 5,208,524   | 120,302      | rs3780373  | rs7853049  | 17            | 3    |
| 3        | Case.Control | Male.Female | 9p24.1           | 6,534,734   | 7,007,391   | 472,657      | rs3902970  | rs7853037  | ..            | 3    |
| 1        | Case         | Male        | 9p23             | 9,719,134   | 9,822,245   | 103,112      | rs10816169 | rs2761763  | 53            | 1    |
| 1        | Case         | Male        | 9p22.3           | 15,987,006  | 16,108,758  | 121,753      | rs2987036  | rs7873155  | 50            | 1    |
| 1        | Case         | Female      | 9p22.2           | 16,987,947  | 17,102,482  | 114,536      | rs442438   | rs263622   | 29            | 1    |
| 1        | Case         | Male        | 9p22.1           | 19,074,444  | 19,199,546  | 125,103      | rs10963949 | rs433305   | 33            | 1    |
| 2        | Case.Control | Male.Female | 9p22.1           | 19,271,099  | 19,523,872  | 252,773      | rs10757048 | rs2383100  | ..            | 3    |
| 1        | Case         | Male        | 9p21.3           | 20,690,838  | 20,887,266  | 196,429      | rs10964665 | rs11531714 | 64            | 1    |
| 1        | Control      | Female      | 9p21.3           | 21,438,448  | 21,556,730  | 118,283      | rs7864960  | rs7865428  | 37            | 3    |
| 7        | Case.Control | Male.Female | 9p21.1           | 28,188,623  | 28,751,593  | 562,970      | rs991849   | rs321728   | ..            | 1    |
| 1        | Case         | Male        | 9p13.3           | 33,318,812  | 33,608,936  | 290,125      | rs2292243  | rs855514   | 54            | 3    |
| 2        | All cases    | All male    | 9q21.11          | 70,764,577  | 71,032,843  | 268,267      | rs10114872 | rs2309428  | 60            | 3    |
| 1        | Control      | Female      | 9q21.33          | 88,793,103  | 89,017,482  | 224,380      | rs10120212 | rs432005   | 50            | 1    |
| 1        | Case         | Male        | 9q22.1           | 89,760,155  | 90,145,367  | 385,213      | rs472627   | rs12348836 | 93            | 3    |
| 1        | Case         | Male        | 9q31.1           | 102,342,854 | 102,492,148 | 149,295      | rs10465148 | rs16919333 | 41            | 3    |
| 1        | Control      | Female      | 9q31.3           | 110,465,741 | 110,653,174 | 187,434      | rs4403487  | rs10448264 | 66            | 1    |
| 1        | Case         | Female      | 9q33.1           | 118,051,212 | 118,410,500 | 359,289      | rs10983088 | rs2416564  | 89            | 3    |
| 1        | Control      | Male        | 9q34.2           | 134,588,424 | 134,728,634 | 140,211      | rs306530   | rs2526004  | 40            | 3    |
| 1        | Case         | Female      | 9q34.3           | 136,718,799 | 136,883,130 | 164,332      | rs10776897 | rs3128570  | 72            | 3    |
| 1        | Case         | Male        | 9q34.3           | 138,155,232 | 138,264,677 | 109,446      | rs1747839  | rs7032944  | 21            | 3    |
| 2        | Case.Control | Male.Female | 9q34.3           | 138,606,913 | 138,907,274 | 300,361      | rs4880055  | rs2811761  | ..            | 3    |

**CNVs 50 – 100 kb**

| #<br>Ids | Status       | Gender    | Chr | Bp Start    | Bp End      | Bp<br>Length | Rs Start   | Rs End     | # Del<br>SNPs | Type |
|----------|--------------|-----------|-----|-------------|-------------|--------------|------------|------------|---------------|------|
| 1        | Control      | Female    | 9   | 194,201     | 263,160     | 68,960       | rs10964134 | rs540909   | 54            | 3    |
| 1        | Case         | Male      | 9   | 194,201     | 279,061     | 84,861       | rs10964134 | rs6476030  | 62            | 3    |
| 1        | Case         | Male      | 9   | 1,905,483   | 1,972,607   | 67,125       | rs4551422  | rs7027936  | 18            | 1    |
| 1        | Control      | Female    | 9   | 9,782,326   | 9,859,714   | 77,389       | rs12684906 | rs10978049 | 39            | 1    |
| 1        | Case         | Male      | 9   | 10,423,023  | 10,491,953  | 68,931       | rs669484   | rs2181156  | 20            | 1    |
| 1        | Case         | Male      | 9   | 15,287,028  | 15,352,057  | 65,030       | rs3905248  | rs1942476  | 26            | 1    |
| 1        | Case         | Female    | 9   | 15,287,028  | 15,360,575  | 73,548       | rs3905248  | rs1105191  | 27            | 1    |
| 1        | Case         | Male      | 9   | 15,865,162  | 15,933,931  | 68,770       | rs2794632  | rs10810488 | 21            | 1    |
| 1        | Control      | Male      | 9   | 17,524,866  | 17,623,232  | 98,367       | rs2593375  | rs2208496  | 39            | 3    |
| 1        | Case         | Male      | 9   | 19,458,614  | 19,523,872  | 65,259       | rs7021669  | rs2383100  | 22            | 3    |
| 1        | Control      | Male      | 9   | 28,388,225  | 28,445,146  | 56,922       | rs10968560 | rs16913128 | 33            | 1    |
| 1        | Control      | Male      | 9   | 28,519,410  | 28,591,613  | 72,204       | rs12551829 | rs16913380 | 25            | 1    |
| 1        | Control      | Female    | 9   | 32,245,125  | 32,331,611  | 86,487       | rs10970869 | rs10970932 | 26            | 1    |
| 1        | Control      | Female    | 9   | 77,568,615  | 77,645,475  | 76,861       | rs7848931  | rs11144641 | 18            | 3    |
| 1        | Control      | Female    | 9   | 131,088,774 | 131,139,212 | 50,439       | rs7029664  | rs2026995  | 23            | 3    |
| 3        | Case.Control | All males | 9   | 132,404,905 | 132,476,485 | 71,581       | rs944605   | rs12351309 | 17            | 3    |
| 1        | Case         | Male      | 9   | 138,374,138 | 138,437,690 | 63,553       | rs11145922 | rs1130635  | 13            | 3    |



## Chromosome 10

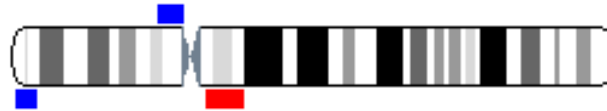

| #<br>Ids | Status         | Gender        | Band<br>position           | Bp Start          | Bp End            | Bp<br>Length     | Rs Start          | Rs End           | # Del<br>SNPs | Type     |
|----------|----------------|---------------|----------------------------|-------------------|-------------------|------------------|-------------------|------------------|---------------|----------|
| 1        | Control        | Female        | 10p15.3                    | 1,125,248         | 1,270,409         | 145,162          | rs4880474         | rs4880802        | 51            | 3        |
| <b>1</b> | <b>Control</b> | <b>Female</b> | <b>10p15.1</b>             | <b>3,862,876</b>  | <b>4,519,263</b>  | <b>656,388</b>   | <b>rs10904103</b> | <b>rs1079110</b> | <b>184</b>    | <b>3</b> |
| 2        | All controls   | All female    | 10p15.1                    | 5,120,610         | 5,383,936         | 263,327          | rs1937905         | rs10752011       | 83            | 1.3      |
| 2        | All cases      | All male      | 10p12.1                    | 27,609,527        | 27,915,012        | 305,486          | rs2483499         | rs1494209        | 68            | 3.1      |
| 1        | Case           | Male          | 10p11.23                   | 28,300,157        | 28,502,418        | 202,262          | rs4405206         | rs4309056        | 58            | 3        |
| <b>1</b> | <b>Case</b>    | <b>Male</b>   | <b>10p11.21</b>            | <b>36,323,016</b> | <b>37,702,921</b> | <b>1,379,906</b> | <b>rs10508823</b> | <b>rs1938421</b> | <b>228</b>    | <b>3</b> |
| 24       | Case.Control   | Male.Female   | 10q11.21                   | 44,530,696        | 44,679,489        | 148,794          | rs7097094         | rs6593445        | 25            | 3        |
| 128      | Case.Control   | Male.Female   | 10q11.22                   | 47,013,328        | 47,173,619        | 160,292          | rs11259779        | rs4128664        | 35            | 3.1      |
| <b>1</b> | <b>Control</b> | <b>Female</b> | <b>10q11.22-<br/>11.23</b> | <b>47,013,328</b> | <b>51,492,912</b> | <b>4,479,585</b> | <b>rs11259779</b> | <b>rs3964873</b> | <b>608</b>    | <b>1</b> |
| 1        | Control        | Female        | 10q21.1                    | 57,834,323        | 57,977,755        | 143,433          | rs10825792        | rs10509049       | 18            | 1        |
| 1        | Control        | Female        | 10q21.2                    | 64,020,539        | 64,140,681        | 120,143          | rs2176289         | rs224136         | 31            | 1        |
| 1        | Control        | Male          | 10q21.3                    | 67,724,488        | 67,878,895        | 154,408          | rs10762051        | rs10997133       | 50            | 1        |
| 2        | Case.Control   | Male.Female   | 10q21.3                    | 67,878,895        | 68,180,377        | 301,482          | rs10997133        | rs12268982       | ..            | 1        |
| 2        | All controls   | All female    | 10q21.3                    | 68,411,841        | 68,592,248        | 180,408          | rs942788          | rs10822992       | 58            | 3        |
| 1        | Control        | Male          | 10q22.3                    | 81,567,594        | 81,962,366        | 394,773          | rs10885307        | rs3000954        | 67            | 3        |
| 1        | Case           | Male          | 10q23.1                    | 82,370,645        | 82,662,797        | 292,153          | rs7067934         | rs2345201        | 95            | 4        |
| 1        | Case           | Male          | 10q25.1                    | 108,160,793       | 108,416,196       | 255,404          | rs17120734        | rs7095427        | 50            | 3        |
| 1        | Control        | Female        | 10q25.2                    | 112,038,085       | 112,236,342       | 198,258          | rs1954281         | rs7911973        | 65            | 3        |
| 2        | All controls   | All female    | 10q25.3                    | 116,142,344       | 116,518,284       | 375,941          | rs537432          | rs11196905       | 98            | 3        |
| 30       | Case.Control   | Male.Female   | 10q26.3                    | 135,116,379       | 135,227,438       | 111,060          | rs2265900         | rs10857762       | 32            | 3.1      |

## CNVs 50 – 100 kb

| # Ids | Status       | Gender      | Chr | Bp Start    | Bp End      | Bp Length | Rs Start   | Rs End     | # Del SNPs | Type |
|-------|--------------|-------------|-----|-------------|-------------|-----------|------------|------------|------------|------|
| 1     | Case         | Male        | 10  | 724,229     | 810,868     | 86,640    | rs1769236  | rs10752019 | 25         | 3    |
| 1     | Control      | Female      | 10  | 5,120,610   | 5,196,096   | 75,487    | rs1937905  | rs2398103  | 20         | 1    |
| 1     | Control      | Female      | 10  | 15,030,375  | 15,100,889  | 70,515    | rs7916726  | rs7916087  | 12         | 3    |
| 7     | Case.Control | Male.Female | 10  | 27,652,366  | 27,745,861  | 93,496    | rs237605   | rs11015755 | 27         | 1    |
| 1     | Control      | Male        | 10  | 47,013,328  | 47,104,196  | 90,869    | rs11259779 | rs11259756 | 16         | 3    |
| 1     | Control      | Female      | 10  | 47,013,328  | 47,110,350  | 97,023    | rs11259779 | rs12775238 | 17         | 3    |
| 1     | Control      | Female      | 10  | 47,058,066  | 47,157,807  | 99,742    | rs17835817 | rs7076022  | 26         | 3    |
| 1     | Control      | Female      | 10  | 47,091,948  | 47,173,619  | 81,672    | rs5019325  | rs4128664  | 26         | 3    |
| 1     | Case         | Male        | 10  | 51,185,540  | 51,264,468  | 78,929    | rs2611512  | rs7350420  | 15         | 1    |
| 1     | Case         | Female      | 10  | 53,422,481  | 53,475,366  | 52,886    | rs11000400 | rs6480687  | 27         | 1    |
| 1     | Case         | Male        | 10  | 56,280,721  | 56,361,311  | 80,591    | rs10763151 | rs1733795  | 29         | 0    |
| 1     | Control      | Male        | 10  | 67,954,023  | 68,023,745  | 69,723    | rs2939914  | rs1911338  | 19         | 1    |
| 1     | Control      | Female      | 10  | 68,139,243  | 68,222,395  | 83,153    | rs10997325 | rs7078170  | 29         | 1    |
| 1     | Case         | Male        | 10  | 76,654,917  | 76,751,854  | 96,938    | rs1505378  | rs2488696  | 18         | 3    |
| 1     | Case         | Male        | 10  | 116,247,513 | 116,322,760 | 75,248    | rs7910989  | rs2483567  | 25         | 1    |
| 1     | Case         | Female      | 10  | 133,967,990 | 134,025,568 | 57,579    | rs2492651  | rs10870295 | 12         | 3    |
| 19    | Case.Control | Male.Female | 10  | 135,116,379 | 135,202,090 | 85,712    | rs2265900  | rs2480258  | 25         | 3    |
| 1     | Case         | Female      | 10  | 135,125,348 | 135,202,090 | 76,743    | rs2252728  | rs2480258  | 24         | 3    |
| 2     | Case.Control | Male.Female | 10  | 135,153,022 | 135,227,438 | 74,417    | rs1329152  | rs10857762 | 23         | 3    |
| 1     | Case         | Male        | 10  | 135,156,148 | 135,227,438 | 71,291    | rs1536827  | rs10857762 | 22         | 3    |
| 1     | Case         | Female      | 10  | 135,170,612 | 135,227,438 | 56,827    | rs9418982  | rs10857762 | 21         | 3    |

## Chromosome 11

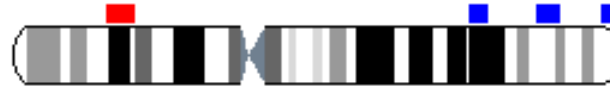

| #<br>Ids | Status       | Gender        | Band<br>position | Bp Start           | Bp End             | Bp<br>Length     | Rs Start         | Rs End            | # Del<br>SNPs | Type     |
|----------|--------------|---------------|------------------|--------------------|--------------------|------------------|------------------|-------------------|---------------|----------|
| 3        | Case.Control | Male.Female   | 11p15.4          | 4,763,448          | 4,865,576          | 102,129          | rs12806476       | rs2595982         | 36            | 1        |
| <b>1</b> | <b>Case</b>  | <b>Male</b>   | <b>11p14.3</b>   | <b>23,777,209</b>  | <b>25,658,239</b>  | <b>1,881,031</b> | <b>rs7111329</b> | <b>rs7930199</b>  | <b>432</b>    | <b>1</b> |
| 2        | All cases    | All male      | 11p13            | 33,089,440         | 33,474,966         | 385,527          | rs3117655        | rs2756277         | 39            | 3        |
| 1        | Case         | Male          | 11q11            | 54,784,999         | 55,179,162         | 394,164          | rs3851113        | rs11230571        | 52            | 3        |
| 1        | Control      | Male          | 11q11            | 55,420,386         | 55,656,373         | 235,988          | rs9943659        | rs11606821        | 71            | 1        |
| 1        | Case         | Male          | 11q11            | 55,841,187         | 55,991,637         | 150,451          | rs1871846        | rs688740          | 35            | 1        |
| 1        | Control      | Male          | 11q13.3          | 70,029,656         | 70,148,281         | 118,626          | rs12364154       | rs4980629         | 45            | 1        |
| 1        | Case         | Male          | 11q13.4          | 71,544,815         | 71,939,763         | 394,949          | rs590586         | rs10793034        | 55            | 1        |
| 1        | Control      | Male          | 11q14.1          | 83,700,473         | 83,941,704         | 241,232          | rs7106746        | rs7937583         | 68            | 1        |
| 2        | Case.Control | Male.Female   | 11q21            | 92,621,411         | 92,823,370         | 201,960          | rs1446905        | rs2658785         | 45            | 1        |
| 1        | Case         | Male          | 11q21            | 94,080,501         | 94,514,354         | 433,854          | rs4753145        | rs530190          | 94            | 3        |
| 1        | Control      | Male          | 11q22.1          | 98,481,670         | 98,587,547         | 105,878          | rs10790462       | rs11606720        | 59            | 1        |
| 1        | Control      | Female        | 11q22.1          | 98,781,901         | 98,916,984         | 135,084          | rs7929417        | rs10790789        | 56            | 1        |
| <b>1</b> | <b>Case</b>  | <b>Female</b> | <b>11q22.3</b>   | <b>104,496,850</b> | <b>105,020,174</b> | <b>523,325</b>   | <b>rs4587693</b> | <b>rs10791764</b> | <b>73</b>     | <b>3</b> |
| <b>1</b> | <b>Case</b>  | <b>Female</b> | <b>11q23.3</b>   | <b>119,320,458</b> | <b>120,113,871</b> | <b>793,414</b>   | <b>rs634351</b>  | <b>rs948032</b>   | <b>181</b>    | <b>3</b> |
| 1        | Control      | Female        | 11q24.1          | 122,823,273        | 122,954,103        | 130,831          | rs2846062        | rs1275056         | 50            | 3        |
| 3        | Case.Control | Male.Female   | 11q25            | 132,329,581        | 132,826,177        | 496,596          | rs4542422        | rs10894683        | ..            | 3        |
| <b>1</b> | <b>Case</b>  | <b>Female</b> | <b>11q25</b>     | <b>133,817,698</b> | <b>134,392,238</b> | <b>574,541</b>   | <b>rs7935790</b> | <b>rs1382495</b>  | <b>203</b>    | <b>3</b> |
| 1        | Control      | Female        | 11q25            | 133,823,692        | 134,226,681        | 402,990          | rs11223820       | rs11605126        | 162           | 3        |

**CNVs 50 – 100 kb**

| #<br>Ids | Status       | Gender      | Chr | Bp Start    | Bp End      | Bp<br>Length | Rs Start   | Rs End     | # Del<br>SNPs | Type |
|----------|--------------|-------------|-----|-------------|-------------|--------------|------------|------------|---------------|------|
| 1        | Control      | Male        | 11  | 1,073,364   | 1,127,086   | 53,723       | rs7396030  | rs7112954  | 13            | 3    |
| 1        | Case         | Male        | 11  | 5,719,425   | 5,769,525   | 50,101       | rs1498550  | rs11039054 | 16            | 1    |
| 1        | Case         | Male        | 11  | 6,712,358   | 6,763,819   | 51,462       | rs12223079 | rs497681   | 21            | 1    |
| 1        | Case         | Female      | 11  | 36,400,971  | 36,484,601  | 83,631       | rs7951020  | rs520074   | 37            | 3    |
| 101      | Case.Control | Male.Female | 11  | 55,127,597  | 55,204,003  | 76,407       | rs2456022  | rs7934845  | 11            | 1    |
| 3        | Case.Control | Male.Female | 11  | 55,139,733  | 55,204,003  | 64,271       | rs573732   | rs7934845  | 10            | 1    |
| 1        | Case         | Male        | 11  | 95,661,034  | 95,730,814  | 69,781       | rs499866   | rs2186760  | 17            | 3    |
| 5        | Case.Control | Male.Female | 11  | 133,663,955 | 133,715,739 | 51,785       | rs3824995  | rs1258852  | 21            | 1    |

## Chromosome 12

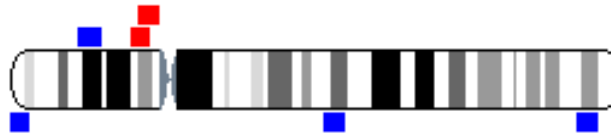

| #<br>Ids | Status         | Gender        | Band<br>position           | Bp Start           | Bp End             | Bp<br>Length     | Rs Start          | Rs End            | # Del<br>SNPs | Type     |
|----------|----------------|---------------|----------------------------|--------------------|--------------------|------------------|-------------------|-------------------|---------------|----------|
| <b>1</b> | <b>Control</b> | <b>Female</b> | <b>12p13.33</b>            | <b>864,191</b>     | <b>1,407,515</b>   | <b>543,325</b>   | <b>rs7300444</b>  | <b>rs16928422</b> | <b>87</b>     | <b>3</b> |
| 1        | Control        | Female        | 12p13.33                   | 1,099,757          | 1,477,651          | 377,895          | rs11829288        | rs10848495        | 60            | 1        |
| 2        | Case.Control   | Male.Female   | 12p13.32                   | 3,944,655          | 4,316,338          | 371,684          | rs658719          | rs7306862         | 93            | 3.1      |
| 1        | Control        | Female        | 12p13.31                   | 6,993,337          | 7,193,249          | 199,913          | rs9668071         | rs3816423         | 33            | 3        |
| 66       | Case.Control   | Male.Female   | 12p13.31                   | 7,876,208          | 8,017,012          | 140,804          | rs7970550         | rs64488801        | ..            | 3.1      |
| 1        | Control        | Female        | 12p13.31                   | 8,496,483          | 8,665,794          | 169,312          | rs6487136         | rs12321209        | 34            | 1        |
| <b>1</b> | <b>Case</b>    | <b>Female</b> | <b>12p12.3</b>             | <b>17,122,370</b>  | <b>18,514,308</b>  | <b>1,391,939</b> | <b>rs1441696</b>  | <b>rs1447408</b>  | <b>256</b>    | <b>3</b> |
| 4        | Case.Control   | Male.Female   | 12p12.3                    | 19,358,223         | 19,478,849         | 120,627          | rs7297169         | rs2638413         | 24            | 3        |
| 4        | All controls   | Male.Female   | 12p12.12.1                 | 20,820,070         | 21,296,099         | 476,029          | rs1588918         | rs7975087         | ..            | 1        |
| 1        | Control        | Female        | 12p11.23                   | 27,229,452         | 27,437,644         | 208,193          | rs4265668         | rs11048998        | 52            | 3        |
| 1        | Control        | Female        | 12q11.23                   | 27,520,009         | 27,679,741         | 159,733          | rs6487610         | rs1002422         | 65            | 3        |
| 2        | All controls   | Male.Female   | 12p11.22                   | 28,347,265         | 28,496,693         | 149,429          | rs7316831         | rs10771427        | 32            | 1        |
| <b>1</b> | <b>Case</b>    | <b>Male</b>   | <b>12p11.22-<br/>11.21</b> | <b>29,224,176</b>  | <b>32,830,870</b>  | <b>3,606,695</b> | <b>rs10843339</b> | <b>rs7960630</b>  | <b>970</b>    | <b>1</b> |
| 34       | Case.Control   | Male.Female   | 12p11.21                   | 31,101,381         | 31,298,174         | 196,794          | rs244496          | rs1025624         | 32            | 3        |
| <b>1</b> | <b>Case</b>    | <b>Female</b> | <b>12p11.1</b>             | <b>33,434,487</b>  | <b>34,008,675</b>  | <b>574,189</b>   | <b>rs1905416</b>  | <b>rs406753</b>   | <b>71</b>     | <b>1</b> |
| 1        | Control        | Female        | 12q12                      | 38,853,914         | 39,058,810         | 204,897          | rs2638247         | rs111176330       | 73            | 1        |
| 1        | Control        | Male          | 12q13.11                   | 45,537,094         | 45,768,933         | 231,840          | rs2263487         | rs739706          | 41            | 3        |
| 1        | Control        | Male          | 12q13.11                   | 46,227,031         | 46,330,773         | 103,743          | rs7958908         | rs1233057         | 23            | 4        |
| 1        | Case           | Male          | 12q13.13                   | 49,517,328         | 49,666,499         | 149,172          | rs10876099        | rs149411          | 24            | 3        |
| 1        | Case           | Male          | 12q13.2                    | 54,945,126         | 55,139,498         | 194,373          | rs1274500         | rs7313455         | 23            | 3        |
| <b>1</b> | <b>Control</b> | <b>Male</b>   | <b>12q21.1</b>             | <b>71,276,461</b>  | <b>71,859,679</b>  | <b>583,219</b>   | <b>rs10506659</b> | <b>rs2138429</b>  | <b>86</b>     | <b>3</b> |
| 1        | Case           | Male          | 12q21.31                   | 82,033,274         | 82,157,215         | 123,942          | rs111115597       | rs12426701        | 35            | 3        |
| 1        | Case           | Male          | 12q24.13-<br>24.21         | 112,749,210        | 112,962,947        | 213,738          | rs11066776        | rs11066904        | 67            | 3        |
| <b>1</b> | <b>Control</b> | <b>Male</b>   | <b>12q24.32</b>            | <b>126,789,194</b> | <b>127,472,548</b> | <b>683,355</b>   | <b>rs11059329</b> | <b>rs10847613</b> | <b>233</b>    | <b>3</b> |

## CNVs 50 – 100 kb

| # Ids | Status       | Gender      | Chr | Bp Start   | Bp End     | Bp Length | Rs Start   | Rs End     | # Del SNPs | Type |
|-------|--------------|-------------|-----|------------|------------|-----------|------------|------------|------------|------|
| 1     | Case         | Female      | 12  | 64,079     | 132,302    | 68,224    | rs4980929  | rs2887340  | 23         | 3    |
| 1     | Case         | Male        | 12  | 5,448,916  | 5,499,193  | 50,278    | rs12370969 | rs4073042  | 22         | 3    |
| 3     | All cases    | Male.Female | 12  | 7,884,583  | 7,982,106  | 97,524    | rs2889545  | rs7309332  | 23         | 3    |
| 1     | Case         | Male        | 12  | 7,888,157  | 7,979,494  | 91,338    | rs11056079 | rs2244822  | 20         | 3    |
| 3     | All cases    | Male.Female | 12  | 7,891,603  | 7,990,569  | 98,967    | rs7965203  | rs1473164  | 22         | 1    |
| 2     | All cases    | All males   | 12  | 7,899,399  | 7,990,569  | 91,171    | rs2889504  | rs1473164  | 20         | 3.1  |
| 1     | Case         | Male        | 12  | 7,913,199  | 7,990,569  | 77,371    | rs10846078 | rs1473164  | 17         | 1    |
| 1     | Case         | Male        | 12  | 7,932,188  | 7,990,569  | 58,382    | rs17800848 | rs1473164  | 13         | 1    |
| 1     | Control      | Female      | 12  | 16,358,963 | 16,457,819 | 98,857    | rs10772921 | rs6488844  | 28         | 3    |
| 1     | Case         | Male        | 12  | 19,358,223 | 19,452,810 | 94,588    | rs7297169  | rs7304081  | 19         | 3    |
| 2     | All controls | Male.Female | 12  | 19,384,370 | 19,452,810 | 68,441    | rs10770476 | rs7304081  | 16         | 3    |
| 7     | Case.Control | Male.Female | 12  | 19,384,370 | 19,469,374 | 85,005    | rs10770476 | rs2961365  | 18         | 3    |
| 1     | Case         | Male        | 12  | 19,396,664 | 19,469,374 | 72,711    | rs11044508 | rs2961365  | 16         | 3    |
| 1     | Case         | Male        | 12  | 21,169,459 | 21,232,363 | 62,905    | rs11045776 | rs11045834 | 24         | 1    |
| 1     | Case         | Male        | 12  | 21,909,431 | 21,988,568 | 79,138    | rs697252   | rs1517272  | 14         | 1    |
| 2     | All controls | Male.Female | 12  | 31,202,342 | 31,298,174 | 95,833    | rs7953222  | rs1025624  | 24         | 3    |
| 1     | Case         | Male        | 12  | 31,226,070 | 31,293,957 | 67,888    | rs11051303 | rs684454   | 20         | 3    |
| 17    | Case.Control | Male.Female | 12  | 31,226,070 | 31,298,174 | 72,105    | rs11051303 | rs1025624  | 23         | 3    |
| 2     | All controls | All males   | 12  | 31,226,070 | 31,300,846 | 74,777    | rs11051303 | rs617372   | 24         | 3    |
| 10    | Case.Control | Male.Female | 12  | 31,889,248 | 31,954,269 | 65,022    | rs2186010  | rs1150990  | 26         | 3    |
| 10    | Case.Control | Male.Female | 12  | 31,892,782 | 31,954,269 | 61,488    | rs2128611  | rs1150990  | 25         | 3    |
| 16    | Case.Control | Male.Female | 12  | 31,895,437 | 31,954,269 | 58,833    | rs7980890  | rs1150990  | 24         | 3    |
| 1     | Case         | Male        | 12  | 46,232,064 | 46,330,773 | 98,710    | rs2214527  | rs1233057  | 22         | 3    |
| 4     | Case.Control | Male.Female | 12  | 50,977,370 | 51,063,780 | 86,411    | rs949387   | rs2245203  | 43         | 3    |
| 1     | Control      | Male        | 12  | 50,977,370 | 51,068,408 | 91,039    | rs949387   | rs949385   | 44         | 3    |
| 1     | Case         | Male        | 12  | 50,978,474 | 51,068,408 | 89,935    | rs17706759 | rs949385   | 43         | 3    |
| 1     | Control      | Female      | 12  | 50,981,897 | 51,043,180 | 61,284    | rs1894033  | rs10876280 | 30         | 3    |
| 1     | Control      | Male        | 12  | 50,981,897 | 51,047,946 | 66,050    | rs1894033  | rs1791625  | 31         | 3    |
| 1     | Control      | Male        | 12  | 50,993,015 | 51,047,946 | 54,932    | rs4761861  | rs1791625  | 25         | 3    |
| 1     | Control      | Male        | 12  | 50,993,015 | 51,063,780 | 70,766    | rs4761861  | rs2245203  | 33         | 3    |
| 1     | Case         | Male        | 12  | 50,994,687 | 51,068,408 | 73,722    | rs2857671  | rs949385   | 33         | 3    |
| 1     | Control      | Male        | 12  | 53,600,613 | 53,697,983 | 97,371    | rs11831847 | rs17116813 | 34         | 1    |

|    |              |             |    |             |             |        |            |            |    |   |
|----|--------------|-------------|----|-------------|-------------|--------|------------|------------|----|---|
| 1  | Case         | Female      | 12 | 80,099,826  | 80,169,986  | 70,161 | rs12425311 | rs1921057  | 11 | 3 |
| 1  | Control      | Male        | 12 | 80,451,775  | 80,544,068  | 92,294 | rs7304553  | rs12826603 | 22 | 3 |
| 1  | Case         | Male        | 12 | 94,821,290  | 94,884,637  | 63,348 | rs6538683  | rs1025607  | 27 | 1 |
| 2  | All cases    | All males   | 12 | 106,929,893 | 107,000,267 | 70,375 | rs1896058  | rs17318454 | 16 | 1 |
| 1  | Case         | Male        | 12 | 122,685,936 | 122,761,809 | 75,874 | rs11572920 | rs7399224  | 12 | 3 |
| 1  | Control      | Female      | 12 | 127,753,095 | 127,830,791 | 77,697 | rs7968958  | rs12299194 | 36 | 3 |
| 1  | Case         | Male        | 12 | 130,281,795 | 130,380,887 | 99,093 | rs7295155  | rs11608663 | 33 | 1 |
| 1  | Case         | Male        | 12 | 130,288,474 | 130,380,887 | 92,414 | rs10848321 | rs11608663 | 30 | 1 |
| 2  | All cases    | All males   | 12 | 130,296,270 | 130,378,451 | 82,182 | rs4387437  | rs4759915  | 26 | 1 |
| 13 | Case.Control | Male.Female | 12 | 130,296,270 | 130,380,887 | 84,618 | rs4387437  | rs11608663 | 27 | 1 |
| 1  | Case         | Female      | 12 | 130,299,179 | 130,380,887 | 81,709 | rs12819042 | rs11608663 | 25 | 1 |

**Chromosome 13**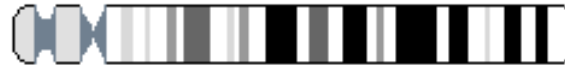

| #<br>Ids | Status       | Gender      | Band<br>position | Bp Start    | Bp End      | Bp<br>Length | Rs Start  | Rs End     | # Del<br>SNPs | Type |
|----------|--------------|-------------|------------------|-------------|-------------|--------------|-----------|------------|---------------|------|
| 1        | Control      | Male        | 13q12.12         | 23,138,331  | 23,310,180  | 171,850      | rs8001054 | rs17079410 | 42            | 3    |
| 2        | All controls | Male.Female | 13q12.12         | 23,381,053  | 24,108,959  | 727,906      | rs7337921 | rs17080865 | ..            | 3.1  |
| 1        | Case         | Female      | 13q12.3          | 30,670,353  | 31,100,333  | 429,981      | rs9598993 | rs9603395  | 96            | 1    |
| 1        | Control      | Female      | 13q21.1          | 56,690,719  | 56,930,507  | 239,789      | rs9563481 | rs1449571  | 30            | 1    |
| 1        | Control      | Male        | 13q21.33         | 69,262,275  | 69,681,012  | 418,738      | rs9572286 | rs2225216  | 104           | 1    |
| 1        | Case         | Male        | 13q22.2          | 75,319,632  | 75,516,975  | 197,344      | rs9530473 | rs9573726  | 74            | 3    |
| 3        | Case.Control | Male.Female | 13q31.3          | 90,843,580  | 91,097,610  | 254,031      | rs9523322 | rs16946366 | 65            | 1    |
| 1        | Control      | Male        | 13q31.3          | 92,612,027  | 92,951,673  | 339,647      | rs319533  | rs7332793  | 91            | 3    |
| 1        | Control      | Female      | 13q33.3          | 106,353,066 | 106,713,791 | 360,726      | rs9301169 | rs1819243  | 97            | 3    |
| 1        | Control      | Female      | 13q34            | 112,241,985 | 112,406,585 | 164,601      | rs9550130 | rs282578   | 36            | 3    |

**CNVs 50 – 100 kb**

| #<br>Ids | Status       | Gender    | Chr | Bp Start    | Bp End      | Bp<br>Length | Rs Start   | Rs End     | # Del<br>SNPs | Type |
|----------|--------------|-----------|-----|-------------|-------------|--------------|------------|------------|---------------|------|
| 1        | Control      | Female    | 13  | 19,386,212  | 19,472,373  | 86,162       | rs1413477  | rs6490506  | 12            | 3    |
| 1        | Case         | Male      | 13  | 24,172,526  | 24,229,027  | 56,502       | rs3783061  | rs3803217  | 16            | 3    |
| 1        | Case         | Male      | 13  | 27,800,008  | 27,877,480  | 77,473       | rs3794400  | rs10507384 | 20            | 3    |
| 1        | Case         | Male      | 13  | 41,477,528  | 41,534,943  | 57,416       | rs17062708 | rs943390   | 18            | 3    |
| 1        | Case         | Male      | 13  | 91,035,934  | 91,097,610  | 61,677       | rs9523366  | rs16946366 | 20            | 1    |
| 1        | Control      | Male      | 13  | 91,759,152  | 91,836,914  | 77,763       | rs7327328  | rs9301803  | 17            | 3    |
| 1        | Control      | Male      | 13  | 94,740,493  | 94,817,355  | 76,863       | rs7330673  | rs2389251  | 33            | 3    |
| 1        | Control      | Male      | 13  | 99,774,563  | 99,853,489  | 78,927       | rs16957301 | rs9557426  | 11            | 1    |
| 1        | Control      | Female    | 13  | 106,990,121 | 107,055,221 | 65,101       | rs2809285  | rs957788   | 22            | 1    |
| 1        | Case         | Male      | 13  | 107,159,560 | 107,238,344 | 78,785       | rs9783586  | rs9555408  | 25            | 1    |
| 2        | Case.Control | All males | 13  | 110,480,001 | 110,542,939 | 62,939       | rs9522086  | rs958378   | 18            | 3    |
| 4        | Case.Control | All males | 13  | 110,480,001 | 110,547,117 | 67,117       | rs9522086  | rs7983441  | 19            | 3    |



|   |         |      |    |             |             |        |           |           |    |   |
|---|---------|------|----|-------------|-------------|--------|-----------|-----------|----|---|
| 1 | Control | Male | 13 | 110,480,001 | 110,571,109 | 91,109 | rs9522086 | rs9555773 | 23 | 3 |
| 1 | Control | Male | 13 | 110,483,173 | 110,547,117 | 63,945 | rs7991093 | rs7983441 | 18 | 3 |

**Chromosome 14**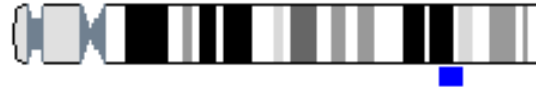

| #<br>Ids | Status         | Gender        | Band<br>position | Bp Start          | Bp End            | Bp<br>Length   | Rs Start        | Rs End           | # Del<br>SNPs | Type     |
|----------|----------------|---------------|------------------|-------------------|-------------------|----------------|-----------------|------------------|---------------|----------|
| 1        | Control        | Female        | 14q11.2          | 22,230,034        | 22,334,110        | 104,077        | rs7140697       | rs8008860        | 33            | 3        |
| 1        | Control        | Male          | 14q13.1-<br>13.2 | 34,023,130        | 34,289,096        | 265,967        | rs8011759       | rs2010608        | 46            | 3        |
| 1        | Control        | Female        | 14q21.3          | 43,889,940        | 44,001,343        | 111,404        | rs10136083      | rs1953572        | 27            | 3        |
| 1        | Case           | Male          | 14q31.1          | 80,469,445        | 80,601,507        | 132,063        | rs2195101       | rs11845164       | 37            | 1        |
| 1        | Case           | Male          | 14q31.3          | 88,246,365        | 88,535,786        | 289,422        | rs10135487      | rs763313         | 41            | 3        |
| <b>1</b> | <b>Control</b> | <b>Female</b> | <b>14q32.11</b>  | <b>89,070,864</b> | <b>89,729,892</b> | <b>659,029</b> | <b>rs386276</b> | <b>rs7155680</b> | <b>153</b>    | <b>4</b> |
| 1        | Control        | Male          | 14q32.33         | 103,056,893       | 103,480,058       | 423,166        | rs2071407       | rs17101957       | 48            | 3        |

**CNVs 50 – 100 kb**

| #<br>Ids | Status    | Gender      | Chr | Bp Start   | Bp End     | Bp<br>Length | Rs Start   | Rs End    | # Del<br>SNPs | Type |
|----------|-----------|-------------|-----|------------|------------|--------------|------------|-----------|---------------|------|
| 1        | Case      | Male        | 14  | 34,425,051 | 34,489,343 | 64,293       | rs1400745  | rs1568200 | 12            | 3    |
| 2        | All cases | Male.Female | 14  | 71,811,439 | 71,865,114 | 53,676       | rs10483843 | rs1996661 | 15            | 1    |

## Chromosome 15

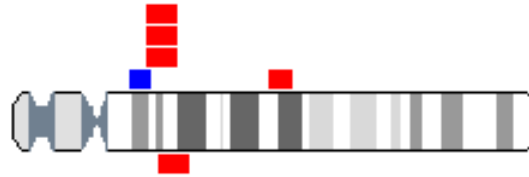

| #<br>Ids | Status           | Gender             | Band<br>position    | Bp Start          | Bp End            | Bp<br>Length     | Rs Start          | Rs End            | # Del<br>SNPs | Type     |
|----------|------------------|--------------------|---------------------|-------------------|-------------------|------------------|-------------------|-------------------|---------------|----------|
| 17       | Case.Control     | Male.Female        | 15q11.2             | 20,306,549        | 20,778,963        | 472,415          | rs8040193         | rs1976210         | 116           | 3.1      |
| 12       | Case.Control     | Male.Female        | 15q11.2             | 21,905,523        | 22,083,695        | 178,173          | rs8032590         | rs1532517         | 18            | 3.1      |
| <b>1</b> | <b>Case</b>      | <b>Female</b>      | <b>15q12-13.1</b>   | <b>25,468,061</b> | <b>26,017,833</b> | <b>549,773</b>   | <b>rs11858785</b> | <b>rs7495174</b>  | <b>152</b>    | <b>3</b> |
| 1        | Case             | Male               | 15q13.1             | 25,818,619        | 25,950,357        | 131,739          | rs2871886         | rs13329466        | 36            | 3        |
| <b>3</b> | <b>All cases</b> | <b>Male.Female</b> | <b>15q13.2-13.3</b> | <b>28,723,577</b> | <b>30,302,218</b> | <b>1,578,642</b> | <b>rs2046362</b>  | <b>rs4779984</b>  | <b>287</b>    | <b>1</b> |
| 2        | All controls     | All male           | 15q13.3             | 29,807,358        | 30,302,218        | 494,861          | rs10459624        | rs4779984         | 89            | 3        |
| <b>1</b> | <b>Control</b>   | <b>Male</b>        | <b>15q13.3-14</b>   | <b>30,713,368</b> | <b>33,237,841</b> | <b>2,524,474</b> | <b>rs11632524</b> | <b>rs11854468</b> | <b>872</b>    | <b>1</b> |
| 1        | Control          | Male               | 15q14               | 32,145,617        | 32,300,108        | 154,492          | rs541098          | rs7169884         | 22            | 1        |
| 2        | Case.Control     | Male.Female        | 15q14               | 32,505,886        | 32,779,408        | 273,522          | rs3894644         | rs4924132         | ..            | 1        |
| 1        | Control          | Female             | 15q21.1             | 42,882,488        | 42,992,246        | 109,759          | rs1152725         | rs4082812         | 13            | 1        |
| 1        | Control          | Male               | 15q21.2             | 48,767,030        | 48,987,325        | 220,296          | rs8027597         | rs2249535         | 31            | 3        |
| <b>1</b> | <b>Case</b>      | <b>Male</b>        | <b>15q21.3</b>      | <b>51,420,702</b> | <b>52,517,515</b> | <b>1,096,814</b> | <b>rs272789</b>   | <b>rs2414315</b>  | <b>338</b>    | <b>1</b> |
| 1        | Control          | Male               | 15q21.3             | 52,559,172        | 52,761,719        | 202,548          | rs4641682         | rs6493701         | 46            | 1        |
| 4        | Case.Control     | Male.Female        | 15q21.3             | 55,431,559        | 55,563,118        | 131,560          | rs935322          | rs12148280        | 79            | 3        |
| 1        | Case             | Male               | 15q22.1-22.2        | 57,055,702        | 57,182,476        | 126,775          | rs2899637         | rs10851643        | 17            | 1        |
| 1        | Case             | Male               | 15q24.3-25.1        | 75,697,257        | 76,189,313        | 492,057          | rs907396          | rs3784327         | 84            | 3        |
| 1        | Control          | Male               | 15q25.3             | 83,626,571        | 83,886,780        | 260,210          | rs6496932         | rs2169876         | 50            | 3        |
| 1        | Control          | Female             | 15q25.3             | 84,206,708        | 84,486,939        | 280,232          | rs1986595         | rs4887198         | 61            | 3        |
| 1        | Control          | Male               | 15q26.1             | 88,650,522        | 88,753,236        | 102,715          | rs6496649         | rs2589948         | 27            | 3        |
| 1        | Control          | Female             | 15q26.3             | 96,539,696        | 96,960,825        | 421,130          | rs1552050         | rs6598534         | 142           | 3        |
| 3        | Case.Control     | Male.Female        | 15q26.3             | 98,197,646        | 98,316,888        | 119,243          | rs11635811        | rs745104          | 24            | 1        |
| 1        | Control          | Female             | 15q26.3             | 98,521,675        | 98,711,322        | 189,648          | rs12437498        | rs13380040        | 81            | 1        |
| 1        | Control          | Male               | 15q26.3             | 99,852,790        | 99,964,634        | 111,845          | rs2047222         | rs4965905         | 53            | 3        |

**CNVs 50 – 100 kb**

| #<br>Ids | Status       | Gender      | Chr | Bp Start   | Bp End      | Bp<br>Length | Rs Start   | Rs End     | # Del<br>SNPs | Type |
|----------|--------------|-------------|-----|------------|-------------|--------------|------------|------------|---------------|------|
| 1        | Control      | Male        | 15  | 20,330,244 | 20,425,225  | 94,982       | rs6606788  | rs548      | 26            | 1    |
| 56       | Case.Control | Male.Female | 15  | 32,505,886 | 32,587,887  | 82,002       | rs3894644  | rs4924714  | 11            | 4.1  |
| 1        | Control      | Male        | 15  | 32,658,588 | 32,719,522  | 60,935       | rs2879515  | rs1836973  | 19            | 1    |
| 1        | Control      | Female      | 15  | 55,441,044 | 55,538,982  | 97,939       | rs4553565  | rs10048047 | 49            | 3    |
| 1        | Case         | Male        | 15  | 58,332,482 | 58,409,103  | 76,622       | rs16942348 | rs8033985  | 25            | 1    |
| 1        | Case         | Male        | 15  | 97,298,194 | 97,367,760  | 69,567       | rs11635251 | rs2654976  | 32            | 3    |
| 1        | Case         | Male        | 15  | 97,299,355 | 97,357,475  | 58,121       | rs2684799  | rs7177074  | 30            | 3    |
| 1        | Case         | Male        | 15  | 99,975,177 | 100,066,701 | 91,525       | rs7168948  | rs8038125  | 12            | 3    |

## Chromosome 16

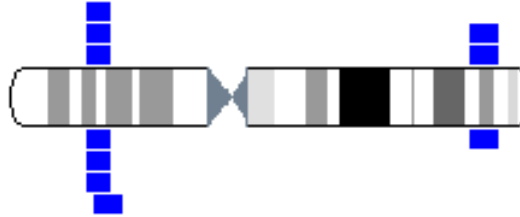

| #<br>Ids | Status              | Gender             | Band<br>position | Bp Start          | Bp End            | Bp<br>Length     | Rs Start          | Rs End            | # Del<br>SNPs | Type     |
|----------|---------------------|--------------------|------------------|-------------------|-------------------|------------------|-------------------|-------------------|---------------|----------|
| 1        | Case                | Female             | 16p13.2          | 6,573,081         | 6,681,580         | 108,500          | rs8044704         | rs7204582         | 73            | 1        |
| 1        | Control             | Male               | 16p13.2          | 6,795,938         | 6,928,412         | 132,475          | rs6500840         | rs11077116        | 68            | 3        |
| 1        | Case                | Male               | 16p13.2          | 6,972,054         | 7,132,653         | 160,600          | rs4287581         | rs12445853        | 74            | 1        |
| 1        | Control             | Female             | 16p13.2          | 7,619,581         | 8,116,843         | 497,263          | rs3785228         | rs8050359         | 190           | 3        |
| 2        | Case.Control        | All male           | 16p13.2          | 8,797,034         | 8,956,611         | 159,578          | rs1864            | rs10500366        | 39            | 3        |
| <b>6</b> | <b>Case.Control</b> | <b>Male.Female</b> | <b>16p13.11</b>  | <b>15,032,942</b> | <b>16,197,033</b> | <b>1,164,092</b> | <b>rs49985124</b> | <b>rs8056397</b>  | <b>201</b>    | <b>3</b> |
| 1        | Case                | Male               | 16p13.11         | 15,420,076        | 15,561,832        | 141,757          | rs3844608         | rs9923708         | 18            | 3        |
| 1        | Control             | Male               | 16p13.11         | 16,002,946        | 16,197,033        | 194,088          | rs4780585         | rs8056397         | 72            | 3        |
| 1        | Control             | Male               | 16p12.3          | 16,767,302        | 17,091,142        | 323,841          | rs11649230        | rs4533273         | 73            | 3        |
| <b>1</b> | <b>Control</b>      | <b>Male</b>        | <b>16p12.3</b>   | <b>16,880,637</b> | <b>18,072,544</b> | <b>1,191,908</b> | <b>rs4496122</b>  | <b>rs9284326</b>  | <b>285</b>    | <b>3</b> |
| 2        | All cases           | All male           | 16p12.2          | 21,482,719        | 21,647,775        | 165,057          | rs13339281        | rs8050407         | 19            | 3.1      |
| 2        | All cases           | Male.Female        | 16p12.1          | 21,856,623        | 22,331,199        | 474,576          | rs2945466         | rs12446433        | ..            | 3        |
| 2        | Case.Control        | Male.Female        | 16p12.1          | 22,581,356        | 22,685,278        | 103,923          | rs2887622         | rs209462          | 20            | 3        |
| 1        | Case                | Male               | 16q23.1          | 74,798,976        | 75,087,696        | 288,721          | rs21944295        | rs17767530        | 78            | 1        |
| 2        | Case.Control        | Male.Female        | 16q23.1          | 75,830,083        | 75,988,077        | 157,994          | rs4887899         | rs17620846        | ..            | 1        |
| 1        | Case                | Male               | 16q23.1          | 76,180,501        | 76,535,568        | 355,068          | rs12925765        | rs7189161         | 198           | 3        |
| 1        | Control             | Female             | 16q23.1          | 76,943,796        | 77,083,313        | 139,518          | rs4624193         | rs12716855        | 39            | 1        |
| <b>3</b> | <b>Case.Control</b> | <b>Male.Female</b> | <b>16q23.3</b>   | <b>80,739,605</b> | <b>82,222,770</b> | <b>1,483,166</b> | <b>rs1056629</b>  | <b>rs12449206</b> | <b>822</b>    | <b>3</b> |
| 1        | Control             | Male               | 16q23.3          | 82,398,662        | 82,502,789        | 104,128          | rs41103           | rs12598185        | 47            | 1        |
| 1        | Case                | Male               | 16q24.1          | 83,663,144        | 83,786,163        | 123,020          | rs12597135        | rs7200824         | 41            | 3        |
| 1        | Case                | Male               | 16q24.2          | 86,225,098        | 86,592,857        | 367,760          | rs16943093        | rs4843294         | 87            | 3        |
| 1        | Case                | Female             | 16q24.3          | 88,171,502        | 88,317,399        | 145,898          | rs455527          | rs6500437         | 18            | 3        |

**CNVs 50 – 100 kb**

| #<br>Ids | Status       | Gender      | Chr | Bp Start   | Bp End     | Bp<br>Length | Rs Start   | Rs End     | # Del<br>SNPs | Type |
|----------|--------------|-------------|-----|------------|------------|--------------|------------|------------|---------------|------|
| 1        | Control      | Male        | 16  | 4,120,912  | 4,185,910  | 64,999       | rs917011   | rs11865087 | 18            | 1    |
| 1        | Control      | Female      | 16  | 6,237,353  | 6,331,875  | 94,523       | rs13331533 | rs1640881  | 44            | 1    |
| 1        | Case         | Male        | 16  | 6,810,629  | 6,869,537  | 58,909       | rs12919350 | rs2172308  | 31            | 1    |
| 1        | Control      | Female      | 16  | 7,073,249  | 7,136,047  | 62,799       | rs1478713  | rs899308   | 45            | 3    |
| 1        | Control      | Female      | 16  | 29,554,843 | 29,618,844 | 64,002       | rs9926100  | rs7195050  | 14            | 3    |
| 1        | Case         | Male        | 16  | 75,813,236 | 75,879,447 | 66,212       | rs13338146 | rs4887902  | 23            | 1    |
| 2        | All controls | All females | 16  | 76,578,045 | 76,629,008 | 50,964       | rs7192427  | rs4309408  | 23            | 1    |
| 1        | Case         | Female      | 16  | 76,619,660 | 76,674,781 | 55,122       | rs2075738  | rs7184271  | 23            | 1    |
| 2        | All controls | Male.Female | 16  | 76,860,767 | 76,922,628 | 61,862       | rs4508428  | rs3924959  | 24            | 1    |
| 1        | Control      | Male        | 16  | 76,860,767 | 76,925,315 | 64,549       | rs4508428  | rs8052110  | 25            | 1    |
| 1        | Control      | Male        | 16  | 79,761,582 | 79,852,394 | 90,813       | rs12934430 | rs6564863  | 30            | 3    |
| 1        | Case         | Male        | 16  | 81,513,721 | 81,602,166 | 88,446       | rs12102479 | rs12925746 | 49            | 1    |
| 1        | Case         | Male        | 16  | 82,613,399 | 82,683,859 | 70,461       | rs2875853  | rs11149625 | 34            | 3    |

**Chromosome 17**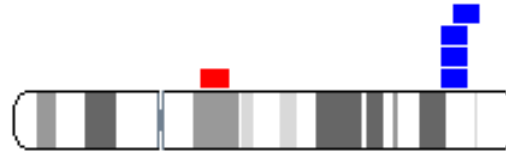

| #<br>Ids | Status           | Gender             | Band<br>position | Bp Start          | Bp End            | Bp<br>Length     | Rs Start         | Rs End           | # Del<br>SNPs | Type     |
|----------|------------------|--------------------|------------------|-------------------|-------------------|------------------|------------------|------------------|---------------|----------|
| 2        | All controls     | Male.Female        | 17p13.3          | 51,088            | 399,648           | 348,560          | rs4890183        | rs3744734        | ..            | 3        |
| 1        | Case             | Female             | 17p13.3          | 1,151,041         | 1,337,249         | 186,209          | rs4790823        | rs2358973        | 42            | 3        |
| 2        | Case.Control     | Male.Female        | 17p13.2-<br>13.1 | 6,699,238         | 6,801,331         | 102,094          | rs4510074        | rs17732181       | 19            | 1        |
| 3        | All cases        | All male           | 17p11.2          | 21,628,545        | 21,755,434        | 126,890          | rs1478999        | rs6565378        | 14            | 3.1      |
| 1        | Case             | Male               | 17q12            | 30,154,039        | 30,312,476        | 158,438          | rs1860199        | rs9635769        | 25            | 1        |
| 1        | Case             | Male               | 17q12            | 31,309,506        | 31,413,531        | 104,026          | rs4796143        | rs1467288        | 24            | 3        |
| 1        | <b>Case</b>      | <b>Male</b>        | <b>17q12</b>     | <b>31,889,664</b> | <b>33,323,543</b> | <b>1,433,880</b> | <b>rs8067765</b> | <b>rs306801</b>  | <b>268</b>    | <b>1</b> |
| 3        | <b>All cases</b> | <b>Male.Female</b> | <b>17q25.1</b>   | <b>69,345,596</b> | <b>70,164,827</b> | <b>819,231</b>   | <b>rs1585804</b> | <b>rs8081794</b> | <b>..</b>     | <b>3</b> |
| 1        | <b>Case</b>      | <b>Male</b>        | <b>17q25.1</b>   | <b>70,869,854</b> | <b>71,746,800</b> | <b>876,947</b>   | <b>rs9899687</b> | <b>rs9903178</b> | <b>123</b>    | <b>3</b> |

**CNVs 50 – 100 kb**

| #<br>Ids | Status       | Gender      | Chr | Bp Start   | Bp End     | Bp<br>Length | Rs Start  | Rs End     | # Del<br>SNPs | Type |
|----------|--------------|-------------|-----|------------|------------|--------------|-----------|------------|---------------|------|
| 3        | Case.Control | Male.Female | 17  | 3,451,964  | 3,502,173  | 50,210       | rs222738  | rs4790530  | 18            | 1    |
| 1        | Control      | Male        | 17  | 4,257,388  | 4,324,728  | 67,341       | rs7207359 | rs4790198  | 29            | 3    |
| 1        | Control      | Female      | 17  | 9,242,675  | 9,298,196  | 55,522       | rs2314640 | rs12946817 | 21            | 1    |
| 1        | Control      | Female      | 17  | 30,708,148 | 30,787,791 | 79,644       | rs7211677 | rs2376263  | 19            | 1    |
| 2        | Case.Control | Male.Female | 17  | 30,708,148 | 30,792,312 | 84,165       | rs7211677 | rs1822403  | 20            | 1    |
| 1        | Control      | Female      | 17  | 33,243,095 | 33,297,438 | 54,344       | rs4794762 | rs10512474 | 19            | 1    |
| 1        | Case         | Male        | 17  | 33,243,095 | 33,323,543 | 80,449       | rs4794762 | rs306801   | 22            | 3    |
| 1        | Case         | Male        | 17  | 45,332,410 | 45,389,028 | 56,619       | rs271672  | rs6504627  | 15            | 3    |
| 1        | Case         | Male        | 17  | 53,939,204 | 54,029,904 | 90,701       | rs2302189 | rs7209650  | 12            | 3    |
| 1        | Case         | Female      | 17  | 76,490,264 | 76,570,569 | 80,306       | rs2280146 | rs7219486  | 29            | 3    |
| 1        | Case         | Male        | 17  | 76,493,532 | 76,559,732 | 66,201       | rs9898178 | rs7502124  | 25            | 3    |
| 1        | Case         | Male        | 17  | 76,493,532 | 76,570,569 | 77,038       | rs9898178 | rs7219486  | 28            | 3    |

**Chromosome 18**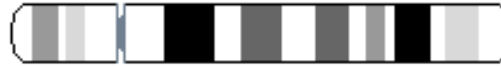

| #<br>Ids | Status       | Gender     | Band<br>position | Bp Start   | Bp End     | Bp<br>Length | Rs Start  | Rs End     | # Del<br>SNPs | Type |
|----------|--------------|------------|------------------|------------|------------|--------------|-----------|------------|---------------|------|
| 1        | Case         | Male       | 18p11.32         | 2,611,407  | 2,712,914  | 101,508      | rs7239383 | rs12608077 | 21            | 3    |
| 1        | Case         | Male       | 18p11.31         | 3,104,980  | 3,309,915  | 204,936      | rs8091028 | rs1662813  | 52            | 3    |
| 1        | Case         | Male       | 18p11.31         | 6,296,121  | 6,616,549  | 320,429      | rs1946753 | rs1941508  | 94            | 3    |
| 1        | Control      | Female     | 18p11.22         | 9,533,988  | 9,662,334  | 128,347      | rs328994  | rs650464   | 31            | 1    |
| 1        | Control      | Male       | 18q12.2          | 35,200,784 | 35,304,682 | 103,899      | rs2066945 | rs1681045  | 16            | 1    |
| 2        | All controls | All female | 18q22.1          | 62,964,964 | 63,596,654 | 631,690      | rs7228283 | rs8083791  | ..            | 3.1  |
| 1        | Control      | Female     | 18q22.1          | 64,795,910 | 64,897,188 | 101,279      | rs593385  | rs11875083 | 43            | 1    |

**CNVs 50 – 100 kb**

| #<br>Ids | Status    | Gender     | Chr | Bp Start   | Bp End     | Bp<br>Length | Rs Start   | Rs End     | # Del<br>SNPs | Type |
|----------|-----------|------------|-----|------------|------------|--------------|------------|------------|---------------|------|
| 2        | All cases | All female | 18  | 27,223,042 | 27,305,675 | 82,634       | rs9946169  | rs8091481  | 18            | 3    |
| 1        | Case      | Male       | 18  | 37,655,531 | 37,745,871 | 90,341       | rs7240984  | rs9948753  | 24            | 1    |
| 1        | Case      | Female     | 18  | 68,477,784 | 68,538,432 | 60,649       | rs7244045  | rs10871704 | 21            | 3    |
| 1        | Control   | Male       | 18  | 70,233,924 | 70,294,366 | 60,443       | rs10445535 | rs9319907  | 25            | 3    |



**Chromosome 19**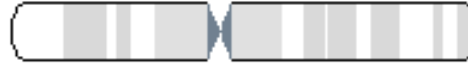

| #<br>Ids | Status       | Gender      | Band<br>position | Bp Start   | Bp End     | Bp<br>Length | Rs Start   | Rs End     | # Del<br>SNPs | Type |
|----------|--------------|-------------|------------------|------------|------------|--------------|------------|------------|---------------|------|
| 4        | Case.Control | Male.Female | 19p13.3-<br>13.2 | 6,846,866  | 7,056,136  | 209,271      | rs330876   | rs2967657  | 54            | 3    |
| 1        | Control      | Male        | 19p13.2          | 11,565,605 | 11,991,477 | 425,873      | rs12972855 | rs157185   | 54            | 1    |
| 1        | Case         | Male        | 19p12            | 20,523,385 | 20,523,385 | 137,445      | rs918442   | rs10413625 | 14            | 1    |
| 4        | Case.Control | Male.Female | 19p12            | 20,625,937 | 20,844,764 | 218,827      | rs274815   | rs1465430  | ..            | 3.1  |
| 1        | Case         | Female      | 19q13.12         | 42,023,454 | 42,429,690 | 406,237      | rs1144539  | rs320881   | 42            | 1    |
| 5        | Case.Control | Male.Female | 19q13.31         | 48,231,029 | 48,387,680 | 156,652      | rs10418982 | rs4803586  | 16            | 3.1  |
| 3        | Case.Control | All male    | 19q13.33         | 56,979,264 | 57,310,877 | 331,614      | rs7260516  | rs3764537  | 80            | 3    |
| 1        | Case         | Female      | 19q13.42         | 59,423,491 | 59,536,249 | 112,759      | rs17207328 | rs1205322  | 32            | 3    |
| 1        | Case         | Male        | 19q13.43         | 63,118,421 | 63,270,390 | 151,970      | rs12981037 | rs2229375  | 27            | 3    |

**CNVs 50 – 100 kb**

| #<br>Ids | Status       | Gender      | Chr | Bp Start   | Bp End     | Bp<br>Length | Rs Start   | Rs End     | # Del<br>SNPs | Type |
|----------|--------------|-------------|-----|------------|------------|--------------|------------|------------|---------------|------|
| 1        | Case         | Male        | 19  | 608,666    | 681,297    | 72,632       | rs3787004  | rs1009690  | 14            | 1    |
| 1        | Case         | Male        | 19  | 12,047,761 | 12,102,245 | 54,485       | rs7259845  | rs1980136  | 10            | 1    |
| 1        | Case         | Female      | 19  | 34,864,124 | 34,958,442 | 94,319       | rs8099974  | rs11672342 | 23            | 3    |
| 1        | Control      | Male        | 19  | 38,023,753 | 38,087,253 | 63,501       | rs929816   | rs4805015  | 19            | 1    |
| 1        | Case         | Female      | 19  | 46,822,616 | 46,921,016 | 98,401       | rs929502   | rs12985771 | 19            | 1    |
| 1        | Control      | Male        | 19  | 48,321,413 | 48,387,680 | 66,268       | rs2354285  | rs4803586  | 12            | 3    |
| 2        | Case.Control | All males   | 19  | 53,731,699 | 53,808,916 | 77,218       | rs16982133 | rs433852   | 25            | 3    |
| 1        | Control      | Male        | 19  | 58,028,179 | 58,128,149 | 99,971       | rs10401828 | rs11673295 | 19            | 3    |
| 2        | Case.Control | All males   | 19  | 58,567,920 | 58,640,198 | 72,279       | rs12978545 | rs11670677 | 23            | 1    |
| 4        | All cases    | Male.Female | 19  | 58,624,107 | 58,697,120 | 73,014       | rs12977919 | rs10410999 | 24            | 1    |
| 3        | Case.Control | All males   | 19  | 58,624,107 | 58,703,196 | 79,090       | rs12977919 | rs4801988  | 26            | 3    |
| 3        | Case.Control | Male.Female | 19  | 58,624,107 | 58,704,092 | 79,986       | rs12977919 | rs7258566  | 27            | 3    |

|   |              |             |    |            |            |        |            |            |    |     |
|---|--------------|-------------|----|------------|------------|--------|------------|------------|----|-----|
| 4 | Case.Control | Male.Female | 19 | 58,624,107 | 58,705,990 | 81,884 | rs12977919 | rs37404    | 28 | 3.1 |
| 1 | Case         | Male        | 19 | 59,440,823 | 59,539,399 | 98,577 | rs422948   | rs17836364 | 29 | 1   |

**Chromosome 20**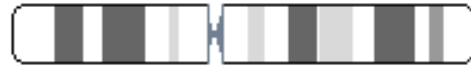

| #<br>Ids | Status       | Gender      | Band<br>position | Bp Start   | Bp End     | Bp<br>Length | Rs Start   | Rs End     | # Del<br>SNPs | Type |
|----------|--------------|-------------|------------------|------------|------------|--------------|------------|------------|---------------|------|
| 1        | Case         | Male        | 20p13            | 1,674,256  | 1,796,203  | 121,948      | rs635029   | rs11698167 | 28            | 3    |
| 2        | Case.Control | All male    | 20p12.3          | 7,985,480  | 8,523,671  | 538,191      | rs1024167  | rs6039206  | ..            | 3    |
| 3        | Case.Control | Male.Female | 20p12.2          | 9,685,413  | 9,833,653  | 148,241      | rs6118717  | rs914596   | 49            | 3    |
| 1        | Case         | Male        | 20p12.1          | 14,348,165 | 14,496,676 | 148,512      | rs6105269  | rs6110333  | 41            | 1    |
| 5        | All controls | Male.Female | 20p12.1          | 14,636,519 | 15,052,193 | 415,674      | rs17775664 | rs1322112  | ..            | 1    |
| 1        | Control      | Female      | 20p11.21         | 23,372,638 | 23,517,400 | 144,763      | rs3746737  | rs4346460  | 33            | 1    |
| 1        | Affected     | Male        | 20p11.21         | 25,125,805 | 25,413,589 | 287,785      | rs2268879  | rs2281212  | 31            | 3    |
| 1        | Control      | Male        | 20q11.22         | 32,201,996 | 32,388,628 | 186,633      | rs1015363  | rs1205339  | 19            | 3    |

**CNVs 50 – 100 kb**

| #<br>Ids | Status    | Gender    | Chr | Bp Start   | Bp End     | Bp<br>Length | Rs Start   | Rs End    | # Del<br>SNPs | Type |
|----------|-----------|-----------|-----|------------|------------|--------------|------------|-----------|---------------|------|
| 1        | Case      | Female    | 20  | 212,997    | 295,908    | 82,912       | rs6082056  | rs6084217 | 22            | 1    |
| 1        | Case      | Male      | 20  | 14,679,595 | 14,771,472 | 91,878       | rs204091   | rs407097  | 46            | 1    |
| 1        | Case      | Male      | 20  | 14,695,471 | 14,788,502 | 93,032       | rs4141463  | rs6079584 | 42            | 1    |
| 2        | All cases | All males | 20  | 15,000,514 | 15,091,806 | 91,293       | rs1407327  | rs4813172 | 47            | 1    |
| 1        | Control   | Male      | 20  | 31,216,437 | 31,289,688 | 73,252       | rs17124254 | rs6059183 | 13            | 1    |
| 1        | Control   | Male      | 20  | 31,224,759 | 31,289,688 | 64,930       | rs10485501 | rs6059183 | 12            | 1    |
| 1        | Case      | Male      | 20  | 31,859,046 | 31,948,090 | 89,045       | rs2064505  | rs2092477 | 21            | 3    |
| 1        | Case      | Male      | 20  | 40,615,725 | 40,676,650 | 60,926       | rs6016824  | rs2867488 | 27            | 1    |
| 1        | Case      | Male      | 20  | 40,617,751 | 40,676,650 | 58,900       | rs6016827  | rs2867488 | 25            | 1    |

**Chromosome 21**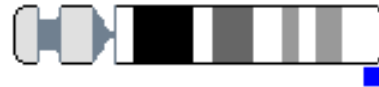

| #<br>Ids | Status         | Gender        | Band<br>position  | Bp Start          | Bp End            | Bp<br>Length   | Rs Start         | Rs End           | # Del<br>SNPs | Type     |
|----------|----------------|---------------|-------------------|-------------------|-------------------|----------------|------------------|------------------|---------------|----------|
| 1        | Control        | Female        | 21q11.2           | 14,474,864        | 14,652,008        | 177,145        | rs17305801       | rs2822624        | 83            | 3        |
| 1        | Control        | Male          | 21q21.1           | 17,742,119        | 17,880,187        | 138,069        | rs2824306        | rs2824376        | 40            | 3        |
| 2        | All cases      | Male.Female   | 21q22.1-<br>22.12 | 34,647,599        | 34,829,283        | 181,685        | rs11702479       | rs2834506        | 50            | 3        |
| 3        | Case.Control   | Male.Female   | 21q22.12          | 36,412,525        | 36,528,540        | 116,016        | rs2409758        | rs7280062        | 29            | 3        |
| 1        | Case           | Male          | 21q22.2           | 40,373,134        | 40,500,483        | 127,350        | rs2254583        | rs13049234       | 56            | 1        |
| <b>1</b> | <b>Control</b> | <b>Female</b> | <b>21q22.3</b>    | <b>45,915,789</b> | <b>46,490,760</b> | <b>574,972</b> | <b>rs2838973</b> | <b>rs2839169</b> | <b>135</b>    | <b>3</b> |
| 1        | Case           | Male          | 21q22.3           | 46,391,256        | 46,601,156        | 209,901        | rs7282864        | rs11700399       | 46            | 1        |

**CNVs 50 – 100 kb**

| #<br>Ids | Status | Gender | Chr | Bp Start   | Bp End     | Bp<br>Length | Rs Start  | Rs End     | # Del<br>SNPs | Type |
|----------|--------|--------|-----|------------|------------|--------------|-----------|------------|---------------|------|
| 1        | Case   | Male   | 21  | 41,794,621 | 41,863,213 | 68,593       | rs2187238 | rs12483160 | 20            | 1    |
| 1        | Case   | Male   | 21  | 46,761,215 | 46,823,682 | 62,468       | rs6518299 | rs2096509  | 30            | 3    |

**Chromosome 22**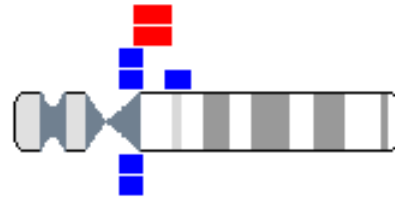

| #<br>Ids | Status              | Gender             | Band<br>position           | Bp Start          | Bp End            | Bp<br>Length     | Rs Start         | Rs End           | # Del<br>SNPs | Type     |
|----------|---------------------|--------------------|----------------------------|-------------------|-------------------|------------------|------------------|------------------|---------------|----------|
| 18       | Case.Control        | Male.Female        | 22q11.1                    | 15,298,335        | 15,674,251        | 375,917          | rs2027653        | rs7291429        | 39            | 3.1      |
| <b>4</b> | <b>Case.Control</b> | <b>Male.Female</b> | <b>22q11.1</b>             | <b>15,298,335</b> | <b>15,842,185</b> | <b>543,851</b>   | <b>rs2027653</b> | <b>rs4819932</b> | <b>89</b>     | <b>3</b> |
| 1        | Case                | Male               | 22q11.1                    | 16,006,665        | 16,214,898        | 208,234          | rs3788268        | rs9606695        | 59            | 3        |
| 29       | Case.Control        | Male.Female        | 22q11.21                   | 17,257,787        | 17,413,532        | 155,746          | rs2543958        | rs5992354        | 32            | 3.1      |
| <b>2</b> | <b>All cases</b>    | <b>All male</b>    | <b>22q11.21</b>            | <b>17,257,787</b> | <b>19,792,353</b> | <b>2,534,567</b> | <b>rs2543958</b> | <b>rs140392</b>  | <b>512</b>    | <b>1</b> |
| 1        | Control             | Female             | 22q11.21                   | 19,420,148        | 19,792,353        | 372,206          | rs11705170       | rs140392         | 102           | 3        |
| 11       | Case.Control        | Male.Female        | 22q11.22                   | 20,645,312        | 20,903,637        | 258,326          | rs2283797        | rs12159423       | 170           | 3.1      |
| <b>1</b> | <b>Case</b>         | <b>Female</b>      | <b>22q11.22-<br/>11.23</b> | <b>21,328,337</b> | <b>21,995,356</b> | <b>667,020</b>   | <b>rs6003181</b> | <b>rs6003620</b> | <b>127</b>    | <b>3</b> |
| 1        | Control             | Male               | 22q11.23                   | 22,488,315        | 22,668,071        | 179,757          | rs738800         | rs6004011        | 52            | 3        |
| 95       | Case.Control        | Male.Female        | 22q11.23                   | 23,966,680        | 24,240,667        | 273,988          | rs4822591        | rs79091          | 55            | 1.3      |
| 2        | Case.Control        | All male           | 22q13.31                   | 45,502,280        | 45,682,591        | 180,312          | rs9626899        | rs5769232        | 55            | 3        |

**CNVs 50 – 100 kb**

| #<br>Ids | Status       | Gender      | Chr | Bp Start   | Bp End     | Bp<br>Length | Rs Start  | Rs End    | # Del<br>SNPs | Type |
|----------|--------------|-------------|-----|------------|------------|--------------|-----------|-----------|---------------|------|
| 1        | Case         | Male        | 22  | 17,257,787 | 17,347,371 | 89,585       | rs2543958 | rs5747950 | 19            | 3    |
| 2        | Case.Control | All females | 22  | 17,257,787 | 17,355,587 | 97,801       | rs2543958 | rs2518805 | 21            | 3    |
| 1        | Control      | Male        | 22  | 17,281,004 | 17,362,097 | 81,094       | rs450046  | rs2913    | 21            | 3    |
| 1        | Control      | Female      | 22  | 17,426,677 | 17,514,083 | 87,407       | rs2238735 | rs4819778 | 22            | 3    |
| 1        | Control      | Female      | 22  | 24,083,777 | 24,178,811 | 95,035       | rs5996921 | rs6004652 | 18            | 3    |
| 1        | Control      | Female      | 22  | 31,340,757 | 31,427,662 | 86,906       | rs2858226 | rs5998590 | 43            | 3    |
| 1        | Control      | Female      | 22  | 32,191,950 | 32,259,352 | 67,403       | rs9621704 | rs2267226 | 22            | 3    |
| 1        | Case         | Male        | 22  | 37,857,855 | 37,935,695 | 77,841       | rs139383  | rs2050143 | 22            | 1    |

**Table S3. Copy Number Variations in Schizophrenia from Literature****Notes:**1) Abbreviations:

Type of mutation: + Gain, - Loss, = Balanced; MR = Mental Retardation, SZ = Schizophrenia, BP = Bipolar Disorder, SA = Schizoaffective Disorder, COS = Childhood-onset Schizophrenia, MPA = Minor Physical Anomalies.

2) Duplications are depicted in blue; Deletions are red.

3) Often, multiple CNVs are described in the same paper. The case entries can be tracked down in the chromosome ideogram. When mentioned for the second or more time, papers are gray in the table, to avoid double calculation of cases. Because often multiple cases are described in one CNV study, no differentiation is made in thickness of bars for CNV studies.

4) Phenotype rating is based upon the following criteria:

**Quality of phenotype****Criteria**

\*\*\*\*

Validated checklist and diagnosis according to DSM or ICD classification

\*\*\*

Clinical description suggestive for schizophrenia and diagnosis according to DSM or ICD classification

\*\*

Diagnosis according to DSM or ICD classification only, OR clinical description suggestive for schizophrenia and diagnosis without classification

\*

Clinical description suggestive for schizophrenia, but no formal diagnosis, OR diagnosis without clinical description or classification

5) In each case, the optimal identification of the molecular boundaries of the cytogenetic abnormalities is presented using a megabase (Mb) scale. When available, positions of molecular markers or DNA-probes were used. In cases where only a karyotype was available, the relevant chromosome bands were used to obtain the approximate molecular boundaries.

6) When in a paper CNVs were split out for presence in cases or controls, only the CNVs specific for schizophrenia cases were included in the table. Additionally, when CNVs were split out for presence in different diagnoses, only the CNVs specific for schizophrenia were included in the table.

**Methods:**

We searched the NLM MEDLINE and PubMed databases with different combinations of the following search terms: “schizophren\*”, “genetic\*”, “cytogenetic\*”, “copy number”, “CNV”, and “chromosom\*”. We included articles up to January 2010. Because several CNV studies used different diagnoses (e.g. schizophrenia and schizoaffective disorder), we focused only on the schizophrenia cases when possible. When the paper discriminated between CNVs found in cases and controls, we only included CNVs for cases. We only included CNVs described within the papers or their supplementary information. We did not contact any authors for additional information. The quality of the phenotype and boundaries of CNV regions were investigated and we included all the CNV regions found in schizophrenia cases.

The ISC study (5) provides their full set of 6,753 QC passing CNVs online: <http://pngu.mgh.harvard.edu/isc/>  
 As it was not possible to include all CNVs in our table or figure, we compared all CNVs > 1 Mb from their study to the ones we found. In total, the ISC reports 262 CNV deletions > 1Mb in cases. We found 11 CNV deletions > 1 Mb in cases. Of these 11 CNVs, 7 overlap with a CNV deletion from the ISC study. For details on CNV boundaries, see the table below.

| <b>Study</b>    | <b>Chromosome</b> | <b>Bp Start position</b> | <b>Bp End position</b> | <b>Length</b> |
|-----------------|-------------------|--------------------------|------------------------|---------------|
| Dutch CNV study | 3                 | 491,255                  | 1,635,507              | 1,144,253     |
| ISC             | 3                 | 285,763                  | 1,636,121              | 1,350,358     |
| Dutch CNV study | 3                 | 197,219,312              | 198,828,573            | 1,609,262     |
| ISC             | 3                 | 197,232,320              | 198,829,110            | 1,596,790     |
| Dutch CNV study | 15                | 28,723,577               | 30,302,218             | 1,578,642     |
| Dutch CNV study | 15                | 28,723,577               | 30,302,218             | 1,578,642     |
| Dutch CNV study | 15                | 28,723,577               | 30,302,218             | 1,578,642     |
| ISC             | 15                | 28,723,577               | 30,571,467             | 1,847,890     |
|                 | 15                | 28,723,577               | 30,537,239             | 1,813,662     |
| ISC             | 15                | 28,723,577               | 30,491,746             | 1,768,469     |
| Dutch CNV study | 17                | 31,889,664               | 33,323,543             | 1,433,880     |
| ISC             | 17                | 31,890,369               | 33,552,902             | 1,662,533     |
| Dutch CNV study | 22                | 17,257,787               | 19,792,353             | 2,534,567     |
| ISC             | 22                | 17,250,982               | 19,790,390             | 2,539,408     |

*CNV deletions > 1 Mb found in schizophrenia cases, showing overlap between our CNV study and the ISC report.*

## Chromosome 1

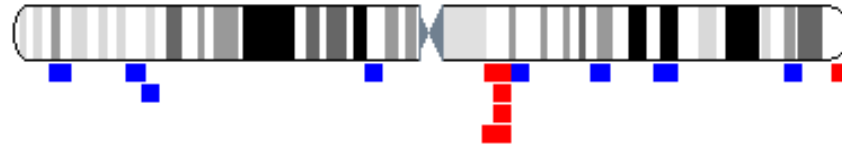

| <i>Band</i> | <i>Type of CNV + study population</i>                                                                                                                                             | <i>Cytogenetic band positions</i>                                   | <i>Size (bp)</i> | <i>Rating Phenotype</i> | <i>Number of cases</i>                          | <i>Reference</i>                               |
|-------------|-----------------------------------------------------------------------------------------------------------------------------------------------------------------------------------|---------------------------------------------------------------------|------------------|-------------------------|-------------------------------------------------|------------------------------------------------|
| 1p36.13     | Duplication found in sample of 447 SZ and 24 SA patients.                                                                                                                         | 17,12 Mb – 18,19 Mb<br>(Exact boundaries from article)              | 1,068,000        | ****                    | 447 SZ and 24 SA                                | Kirov <i>et al.</i> 2009(1)                    |
| 1p34.3      | Duplication in a post-mortem study of 105 SZ, BP and controls. Exclusion IQ < 70.                                                                                                 | 34,53 Mb – 40,07 Mb<br>(Approximate. Includes BAC clone RP11-207P5) | 5,537,563        | **                      | 35 SZ cases                                     | Wilson <i>et al.</i> 2006(2)                   |
| 1p34.2      | Duplication found in male SZ patient.                                                                                                                                             | 40,06 Mb – 40,68 Mb<br>(Exact boundaries from article)              | 614,100          | ****                    | 14 SZ cases with each a <i>de novo</i> mutation | Xu <i>et al.</i> 2008(3)                       |
| 1p13.3      | Duplication found in SZ female. No learning disabilities.                                                                                                                         | 110,03 Mb – 110,04 Mb<br>(Exact boundaries from article)            | 5,925            | ****                    | 1                                               | Rodriguez-Santiago <i>et al.</i> 2009(4)       |
| 1q21.1      | Deletions in ten SZ cases and one control (3,391 SZ patients satisfying DSM-IV or IDC-10 compared to 3,181 matched controls).                                                     | 142,50 Mb – 145,50 Mb<br>(Exact boundaries from article)            | 3,000,000        | ****                    | 3,391 SZ cases and 3,181 controls               | International Schizophrenia Consortium 2008(5) |
| 1q21.1      | Deletion found in SZ cases (first sample SZ and SA, second sample COS).                                                                                                           | 144,94 Mb – 146,29 Mb<br>(Exact boundaries from article)            | 1,349,136        | ****                    | 150 SZ cases and 268 controls                   | Walsh <i>et al.</i> 2008(6)                    |
| 1q21.1      | Deletion significantly associated with SZ (4,718 genotyped cases: 4,571 SZ, 39 unspecified functional psychosis, 86 SA, 10 schizophreniform, 12 persistent delusional disorders). | 144,94 Mb – 146,29 Mb<br>(Exact boundaries from article)            | 1,349,136        | ****                    | 4,718 SZ cases and 41,201 controls              | Stefansson <i>et al.</i> 2008(7)               |
| 1q21.1      | Deletion found in sample of 1,013 SZ cases.                                                                                                                                       | 144,11 Mb – 146,29 Mb<br>(Exact boundaries from article)            | 2,186,971        | ****                    | 1,013 SZ cases and 1,084 controls               | Need <i>et al.</i> 2009(8)                     |



Table S3 J.E. Buizer-Voskamp *et al.* 105

|        |                                                                            |                                                          |           |      |                                      |                                |
|--------|----------------------------------------------------------------------------|----------------------------------------------------------|-----------|------|--------------------------------------|--------------------------------|
| 1q21.3 | Duplication found in male SZ patient.                                      | 150,14 Mb – 150,25 Mb<br>(Exact boundaries from article) | 110,538   | **** | 1                                    | Xu <i>et al.</i><br>2009(9)    |
| 1q25.2 | Duplication found in female SZ patient.                                    | 176,05 Mb – 176,20 Mb<br>(Exact boundaries from article) | 151,152   | **** | 1                                    | Xu <i>et al.</i><br>2009(9)    |
| 1q31.1 | Duplication found in sample of 1,013 SZ cases.                             | 185,09 Mb – 187,70 Mb<br>(Exact boundaries from article) | 2,613,899 | **** | 1,013 SZ cases<br>and 1,084 controls | Need <i>et al.</i><br>2009(8)  |
| 1q42.2 | Duplication found in SZ cases (first sample SZ and SA, second sample COS). | 232,46 Mb – 232,67 Mb<br>(Exact boundaries from article) | 209,095   | **** | 150 SZ cases and<br>268 controls     | Walsh <i>et al.</i><br>2008(6) |
| 1q44   | Deletion found in male SZ patient.                                         | 246,40 Mb – 246,70 Mb<br>(Exact boundaries from article) | 297,204   | **** | 1                                    | Xu <i>et al.</i><br>2009(9)    |

## Chromosome 2

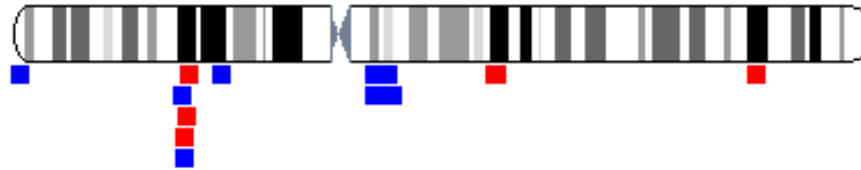

| <i>Band</i>  | <i>Type of CNV + study population</i>                                                                                                                               | <i>Cytogenetic band positions</i>                        | <i>Size (bp)</i>                        | <i>Rating Phenotype</i> | <i>Number of cases</i>            | <i>Reference</i>                  |
|--------------|---------------------------------------------------------------------------------------------------------------------------------------------------------------------|----------------------------------------------------------|-----------------------------------------|-------------------------|-----------------------------------|-----------------------------------|
| 2p25.3       | 3 Duplications found in three male SZ patients. Mild MR present in one male with the duplication.                                                                   | 0,83 Mb – 1,84 Mb<br>(Exact boundaries from article)     | 1,014,000                               | ****                    | 3                                 | Vrijenhoek <i>et al.</i> 2008(10) |
| 2p16.3       | Deletion found in sample of 93 SZ patients. No MR.                                                                                                                  | 51,10 Mb – 51,35 Mb<br>(Exact boundaries from article)   | 250,000                                 | ****                    | 93 SZ cases                       | Kirov <i>et al.</i> 2008(11)      |
| 2p16.3       | Duplication found in SZ cases (first sample SZ and SA, second sample COS)                                                                                           | 48,65 Mb – 49,32 Mb<br>(Exact boundaries from article)   | 670,929                                 | ****                    | 150 SZ cases and 268 controls     | Walsh <i>et al.</i> 2008(6)       |
| 2p16.3       | Deletion found in two SZ male. IQ = 94 for one and not assessed for the other. No clinical features.                                                                | 47,60 Mb – 52,70 Mb<br>(approximate)                     | 107 kb and <532 kb (exact from article) | ****                    | 2                                 | Guilmatre <i>et al.</i> 2009(12)  |
| 2p16.3       | 4 Deletions found in 2 male and 2 female SZ patients. 2 Duplications found in one male SZ patient and one female control. MR present in one male with the deletion. | 50,89 Mb – 51,28 Mb<br>(Exact boundaries from article)   | 389,000                                 | ****                    | 5 (plus one intronic control)     | Vrijenhoek <i>et al.</i> 2008(10) |
| 2p15         | Duplication found in male SZ patient.                                                                                                                               | 61,10 Mb – 61,29 Mb<br>(Exact boundaries from article)   | 190,832                                 | ****                    | 1                                 | Xu <i>et al.</i> 2009(9)          |
| 2q12.2-q12.3 | Duplication found in sample of 447 SZ and 24 SA patients.                                                                                                           | 106,28 Mb – 107,79 Mb<br>(Exact boundaries from article) | 1,517,000                               | ****                    | 447 SZ and 24 SA                  | Kirov <i>et al.</i> 2009(1)       |
| 2q12.2-q13   | Duplication found in sample of 1,013 SZ cases.                                                                                                                      | 106,28 Mb – 109,17 Mb<br>(Exact boundaries from article) | 2,983,492                               | ****                    | 1,013 SZ cases and 1,084 controls | Need <i>et al.</i> 2009(8)        |

Table S3 J.E. Buizer-Voskamp *et al.* 107

|        |                                                                         |                                                          |           |      |                               |                             |
|--------|-------------------------------------------------------------------------|----------------------------------------------------------|-----------|------|-------------------------------|-----------------------------|
| 2q22.1 | Deletion found in sample of 447 SZ and 24 SA patients.                  | 139,15 Mb – 140,20 Mb<br>(Exact boundaries from article) | 1,048,000 | **** | 447 SZ and 24 SA              | Kirov <i>et al.</i> 2009(1) |
| 2q34   | Deletion found in SZ cases (first sample SZ and SA, second sample COS). | 211,79 Mb – 212,19 Mb<br>(Exact boundaries from article) | 399,157   | **** | 150 SZ cases and 268 controls | Walsh <i>et al.</i> 2008(6) |

## Chromosome 3

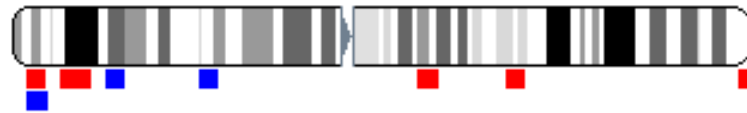

| Band   | Type of CNV + study population                                             | Cytogenetic band positions                               | Size (bp) | Rating Phenotype | Number of cases                                 | Reference                   |
|--------|----------------------------------------------------------------------------|----------------------------------------------------------|-----------|------------------|-------------------------------------------------|-----------------------------|
| 3p26.1 | Deletion found in SZ cases (first sample SZ and SA, second sample COS).    | 7,18 Mb – 7,31 Mb<br>(Exact boundaries from article)     | 136,520   | ****             | 150 SZ cases and 268 controls                   | Walsh <i>et al.</i> 2008(6) |
| 3p26.1 | Duplication found in male SZ patient.                                      | 8,13 Mb – 8,19 Mb<br>(Exact boundaries from article)     | 67,200    | ****             | 14 SZ cases with each a <i>de novo</i> mutation | Xu <i>et al.</i> 2008(3)    |
| 3p24.3 | Deletion found in sample of 447 SZ and 24 SA patients.                     | 17,18 Mb – 20,59 Mb<br>(Exact boundaries from article)   | 3,407,000 | ****             | 447 SZ and 24 SA                                | Kirov <i>et al.</i> 2009(1) |
| 3p24.1 | Duplication found in female SZ patient.                                    | 28,28 Mb – 28,44 Mb<br>(Exact boundaries from article)   | 164,300   | ****             | 14 SZ cases with each a <i>de novo</i> mutation | Xu <i>et al.</i> 2008(3)    |
| 3p21.1 | Duplication found in SZ cases (first sample SZ and SA, second sample COS). | 53,06 Mb – 53,19 Mb<br>(Exact boundaries from article)   | 135,181   | ****             | 150 SZ cases and 268 controls                   | Walsh <i>et al.</i> 2008(6) |
| 3q13.2 | Deletion found in one male SZ patient.                                     | 113,51 Mb – 113,78 Mb<br>(Exact boundaries from article) | 268,694   | ****             | 1                                               | Xu <i>et al.</i> 2009(9)    |
| 3q22.2 | Deletion found in male SZ patient.                                         | 135,77 Mb – 137,79 Mb<br>(Exact boundaries from article) | 2,022,600 | ****             | 14 SZ cases with each a <i>de novo</i> mutation | Xu <i>et al.</i> 2008(3)    |
| 3q29   | Deletion found in SZ cases (first sample SZ and SA, second sample COS).    | 197,22 Mb – 198,57 Mb<br>(Exact boundaries from article) | 1,348,553 | ****             | 150 SZ cases and 268 controls                   | Walsh <i>et al.</i> 2008(6) |

## Chromosome 4

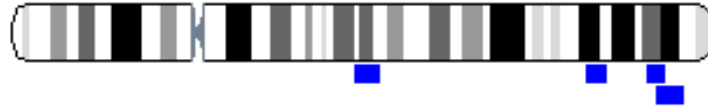

| <i>Band</i> | <i>Type of CNV + study population</i>          | <i>Cytogenetic band positions</i>                        | <i>Size (bp)</i> | <i>Rating Phenotype</i> | <i>Number of cases</i>                          | <i>Reference</i>           |
|-------------|------------------------------------------------|----------------------------------------------------------|------------------|-------------------------|-------------------------------------------------|----------------------------|
| 4q22.3-q23  | Duplication found in sample of 1,013 SZ cases. | 96,87 Mb – 99,17 Mb<br>(Exact boundaries from article)   | 2,301,363        | ****                    | 1,013 SZ cases and 1,084 controls               | Need <i>et al.</i> 2009(8) |
| 4q32.1      | Duplication found in one female SZ patient.    | 160,10 Mb – 160,82 Mb<br>(Exact boundaries from article) | 716,428          | ****                    | 1                                               | Xu <i>et al.</i> 2009(9)   |
| 4q34.1      | Duplication found in male SZ patient.          | 175,11 Mb – 175,16 Mb<br>(Exact boundaries from article) | 43,300           | ****                    | 14 SZ cases with each a <i>de novo</i> mutation | Xu <i>et al.</i> 2008(3)   |
| 4q34.3      | Duplication found in sample of 1,013 SZ cases. | 179,89 Mb – 182,80 Mb<br>(Exact boundaries from article) | 2,426,029        | ****                    | 1,013 SZ cases and 1,084 controls               | Need <i>et al.</i> 2009(8) |

## Chromosome 5

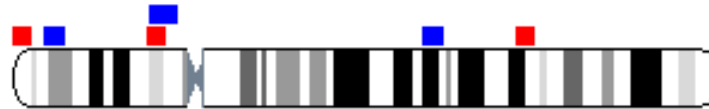

| <i>Band</i>  | <i>Type of CNV + study population</i>                                             | <i>Cytogenetic band positions</i>                        | <i>Size (bp)</i> | <i>Rating Phenotype</i> | <i>Number of cases</i>                          | <i>Reference</i>                  |
|--------------|-----------------------------------------------------------------------------------|----------------------------------------------------------|------------------|-------------------------|-------------------------------------------------|-----------------------------------|
| 5p15.33      | Deletion found in sample of 447 SZ and 24 SA patients.                            | 0,17 Mb – 1,20 Mb<br>(Exact boundaries from article)     | 1,031,000        | ****                    | 447 SZ and 24 SA                                | Kirov <i>et al.</i> 2009(1)       |
| 5p15.2       | Duplication found in one female SZ patient. No MR present.                        | 10,21 Mb – 11,23 Mb<br>(Exact boundaries from article)   | 1,019,000        | ****                    | 1                                               | Vrijenhoek <i>et al.</i> 2008(10) |
| 5p13.2       | Deletion found in SZ cases (first sample SZ and SA, second sample COS).           | 36,19 Mb – 36,69 Mb<br>(Exact boundaries from article)   | 502,683          | ****                    | 150 SZ cases and 268 controls                   | Walsh <i>et al.</i> 2008(6)       |
| 5p13.2-p13.1 | Duplication found in sample of 1,013 SZ cases.                                    | 37,62 Mb – 39,73 Mb<br>(Exact boundaries from article)   | 2,108,551        | ****                    | 1,013 SZ cases and 1,084 controls               | Need <i>et al.</i> 2009(8)        |
| 5q21.3       | Duplication in a post-mortem study of 105 SZ, BP and controls. Exclusion IQ < 70. | 106,73 Mb – 109,73 Mb<br>(BAC clone RP11-252113)         | 3,006,598        | **                      | 35 SZ cases                                     | Wilson <i>et al.</i> 2006(2)      |
| 5q31.1       | Deletion found in male SZ patient.                                                | 130,86 Mb – 130,98 Mb<br>(Exact boundaries from article) | 114,300          | ****                    | 14 SZ cases with each a <i>de novo</i> mutation | Xu <i>et al.</i> 2008(3)          |

## Chromosome 6

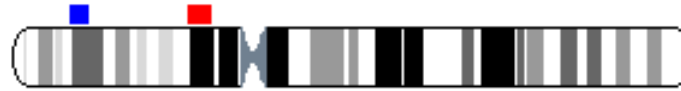

| <i>Band</i> | <i>Type of CNV + study population</i>                  | <i>Cytogenetic band positions</i>                      | <i>Size (bp)</i> | <i>Rating Phenotype</i> | <i>Number of cases</i>                        | <i>Reference</i>            |
|-------------|--------------------------------------------------------|--------------------------------------------------------|------------------|-------------------------|-----------------------------------------------|-----------------------------|
| 6p22.3      | Duplication found in female SZ patient.                | 17,58 Mb – 17,94 Mb<br>(Exact boundaries from article) | 364,300          | ****                    | 14 SZ cases with each <i>de novo</i> mutation | Xu <i>et al.</i> 2008(3)    |
| 6p12.3      | Deletion found in sample of 447 SZ and 24 SA patients. | 48,11 Mb – 49,30 Mb<br>(Exact boundaries from article) | 1,188,000        | ****                    | 447 SZ and 24 SA                              | Kirov <i>et al.</i> 2009(1) |

## Chromosome 7

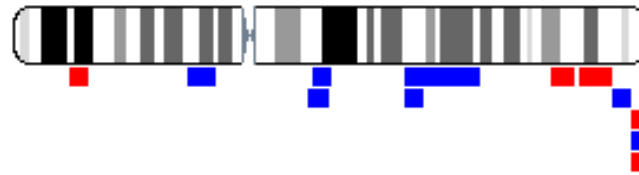

| Band                    | Type of CNV + study population                                             | Cytogenetic band positions                               | Size (bp)  | Rating Phenotype | Number of cases               | Reference                                |
|-------------------------|----------------------------------------------------------------------------|----------------------------------------------------------|------------|------------------|-------------------------------|------------------------------------------|
| 7p21.1                  | Deletion found in one male SZ patient.                                     | 16,13 Mb – 16,37 Mb<br>(Exact boundaries from article)   | 238,474    | ****             | 1                             | Xu <i>et al.</i> 2009(9)                 |
| 7p12.3                  | Duplication found in sample of 447 SZ and 24 SA patients.                  | 47,26 Mb – 49,04 Mb<br>(Exact boundaries from article)   | 1,783,000  | ****             | 447 SZ and 24 SA              | Kirov <i>et al.</i> 2009(1)              |
| 7q11.23-q21.11          | Duplication found in SZ cases (first sample SZ and SA, second sample COS). | 77,36 Mb – 77,86 Mb<br>(Exact boundaries from article)   | 498,447    | ****             | 150 SZ cases and 268 controls | Walsh <i>et al.</i> 2008(6)              |
| 7q11.23                 | Duplication found in one male SZ patient.                                  | 75,99 Mb – 76,60 Mb<br>(Exact boundaries from article)   | 618,247    | ****             | 1                             | Xu <i>et al.</i> 2009(9)                 |
| 7q22.1-q31.2            | Duplication found in SZ cases (first sample SZ and SA, second sample COS). | 100,30 Mb – 115,97 Mb<br>(Exact boundaries from article) | 15,668,290 | ****             | 150 SZ cases and 268 controls | Walsh <i>et al.</i> 2008(6)              |
| 7q22.1                  | Duplication found in SZ male. No learning disabilities.                    | 101,82 Mb – 101,85 Mb<br>(Exact boundaries from article) | 30,325     | ****             | 1                             | Rodriguez-Santiago <i>et al.</i> 2009(4) |
| 7q34                    | Deletion found in sample of 447 SZ and 24 SA patients.                     | 137,85 Mb – 139,32Mb<br>(Exact boundaries from article)  | 1,472,000  | ****             | 447 SZ and 24 SA              | Kirov <i>et al.</i> 2009(1)              |
| 7q35-q36.1 <sup>3</sup> | Deletion found in three unrelated SZ cases. 2 cases with MR and 1 without. | 143,04 Mb – 147,85 Mb<br>(Exact boundaries from article) | 4,814,084  | *                | 3                             | Friedman <i>et al.</i> 2008(13)          |

<sup>3</sup> This study describes three unrelated SZ patients with the same deletion. Two cases are mentally retarded, one patient has normal IQ. None of the patients has dysmorphic features.



Table S3 J.E. Buizer-Voskamp *et al.* 113

|        |                                                                            |                                                          |           |      |                               |                             |
|--------|----------------------------------------------------------------------------|----------------------------------------------------------|-----------|------|-------------------------------|-----------------------------|
| 7q36.1 | Duplication found in SZ cases (first sample SZ and SA, second sample COS). | 151,07 Mb – 151,53 Mb<br>(Exact boundaries from article) | 461,992   | **** | 150 SZ cases and 268 controls | Walsh <i>et al.</i> 2008(6) |
| 7q36.3 | Deletion and duplication found in sample of 447 SZ and 24 SA patients.     | 157,74 Mb – 158,80 Mb<br>(Exact boundaries from article) | 1,054,000 | **** | 447 SZ and 24 SA              | Kirov <i>et al.</i> 2009(1) |
| 7q36.3 | Deletion found in one female SZ patient.                                   | 157,41 Mb – 157,50 Mb<br>(Exact boundaries from article) | 89,909    | **** | 1                             | Xu <i>et al.</i> 2009(9)    |

## Chromosome 8

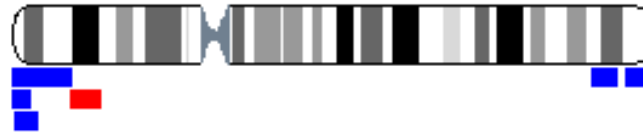

| <i>Band</i> | <i>Type of CNV + study population</i>                                      | <i>Cytogenetic band positions</i>                     | <i>Size (bp)</i>         | <i>Rating Phenotype</i> | <i>Number of cases</i>            | <i>Reference</i>                         |
|-------------|----------------------------------------------------------------------------|-------------------------------------------------------|--------------------------|-------------------------|-----------------------------------|------------------------------------------|
| 8p23        | Duplication found in one SZ male. IQ = 67. Dysmorphisms present.           | Pter – 12,70 Mb (approximate)                         | 110 (exact from article) | ****                    | 1                                 | Guilmatre <i>et al.</i> 2009(12)         |
| 8p23.3      | Duplication found in SZ male. No learning disabilities.                    | 1,98 Mb – 2,08 Mb (Exact boundaries from article)     | 1,002,000                | ****                    | 1                                 | Rodriguez-Santiago <i>et al.</i> 2009(4) |
| 8p23.2      | Duplication found in one female SZ patient.                                | 2,32 Mb – 3,46 Mb (Exact boundaries from article)     | 1,135,638                | ****                    | 1                                 | Xu <i>et al.</i> 2009(9)                 |
| 8p22        | Deletion found in sample of 1,013 SZ cases.                                | 15,10 Mb – 18,36 Mb (Exact boundaries from article)   | 3,261,207                | ****                    | 1,013 SZ cases and 1,084 controls | Need <i>et al.</i> 2009(8)               |
| 8q24.23     | Duplication found in sample of 447 SZ and 24 SA patients.                  | 136,87Mb – 138,14 Mb (Exact boundaries from article)  | 1,266,000                | ****                    | 447 SZ and 24 SA                  | Kirov <i>et al.</i> 2009(1)              |
| 8q24.3      | Duplication found in SZ cases (first sample SZ and SA, second sample COS). | 142,03 Mb – 142,39 Mb (Exact boundaries from article) | 368,516                  | ****                    | 150 SZ cases and 268 controls     | Walsh <i>et al.</i> 2008(6)              |

## Chromosome 9

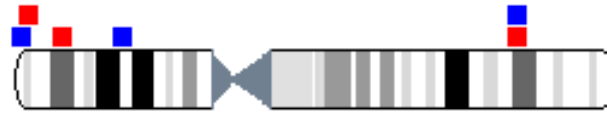

| <i>Band</i>  | <i>Type of CNV + study population</i>                                                                                            | <i>Cytogenetic band positions</i>                        | <i>Size (bp)</i> | <i>Rating Phenotype</i> | <i>Number of cases</i>                        | <i>Reference</i>                  |
|--------------|----------------------------------------------------------------------------------------------------------------------------------|----------------------------------------------------------|------------------|-------------------------|-----------------------------------------------|-----------------------------------|
| 9p24.3-p24.2 | Duplication found in SZ cases (first sample SZ and SA, second sample COS).                                                       | 2,01 Mb – 3,12 Mb<br>(Exact boundaries from article)     | 1,105,058        | ****                    | 150 SZ cases and 268 controls                 | Walsh <i>et al.</i> 2008(6)       |
| 9p24.2       | Deletion found in SZ cases (first sample SZ and SA, second sample COS).                                                          | 3,10 Mb – 3,54 Mb<br>(Exact boundaries from article)     | 440,089          | ****                    | 150 SZ cases and 268 controls                 | Walsh <i>et al.</i> 2008(6)       |
| 9p23         | Deletion found in male SZ patient.                                                                                               | 11,62 Mb – 11,88 Mb<br>(Exact boundaries from article)   | 259,900          | ****                    | 14 SZ cases with each <i>de novo</i> mutation | Xu <i>et al.</i> 2008(3)          |
| 9p21.3-p21.2 | Duplication found in SZ cases (first sample SZ and SA, second sample COS).                                                       | 25,33 Mb – 25,85 Mb<br>(Exact boundaries from article)   | 526,889          | ****                    | 150 SZ cases and 268 controls                 | Walsh <i>et al.</i> 2008(6)       |
| 9q33.1       | 1 Deletion found in one male SZ patient. 1 Duplication found in one female SZ patient. MR present in the male with the deletion. | 118,41 Mb – 118,51 Mb<br>(Exact boundaries from article) | 98,000           | ****                    | 2                                             | Vrijenhoek <i>et al.</i> 2008(10) |

**Chromosome 10**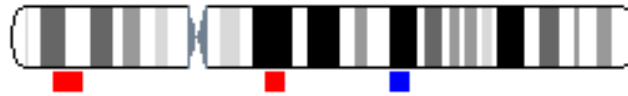

| <i>Band</i> | <i>Type of CNV + study population</i>                  | <i>Cytogenetic band positions</i>                      | <i>Size (bp)</i> | <i>Rating Phenotype</i> | <i>Number of cases</i>                        | <i>Reference</i>            |
|-------------|--------------------------------------------------------|--------------------------------------------------------|------------------|-------------------------|-----------------------------------------------|-----------------------------|
| 10p13       | Deletion found in sample of 447 SZ and 24 SA patients. | 12,67 Mb – 14,64 Mb<br>(Exact boundaries from article) | 1,970,000        | ****                    | 447 SZ and 24 SA                              | Kirov <i>et al.</i> 2009(1) |
| 10q21.1     | Deletion found in male SZ patient.                     | 57,67 Mb – 57,69 Mb<br>(Exact boundaries from article) | 27,600           | ****                    | 14 SZ cases with each <i>de novo</i> mutation | Xu <i>et al.</i> 2008(3)    |
| 10q23.1     | Duplication found in one male SZ patient.              | 83,70 Mb – 83,78 Mb<br>(Exact boundaries from article) | 73,592           | ****                    | 1                                             | Xu <i>et al.</i> 2009(9)    |

## Chromosome 11

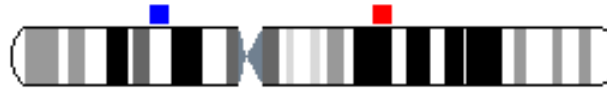

| <i>Band</i> | <i>Type of CNV + study population</i>                                      | <i>Cytogenetic band positions</i>                      | <i>Size (bp)</i> | <i>Rating Phenotype</i> | <i>Number of cases</i>        | <i>Reference</i>            |
|-------------|----------------------------------------------------------------------------|--------------------------------------------------------|------------------|-------------------------|-------------------------------|-----------------------------|
| 11p13       | Duplication found in SZ cases (first sample SZ and SA, second sample COS). | 33,26 Mb – 33,54 Mb<br>(Exact boundaries from article) | 279,213          | ****                    | 150 SZ cases and 268 controls | Walsh <i>et al.</i> 2008(6) |
| 11q14.1     | Deletion found in SZ cases (first sample SZ and SA, second sample COS).    | 83,69 Mb – 83,94 Mb<br>(Exact boundaries from article) | 242,105          | ****                    | 150 SZ cases and 268 controls | Walsh <i>et al.</i> 2008(6) |

## Chromosome 12

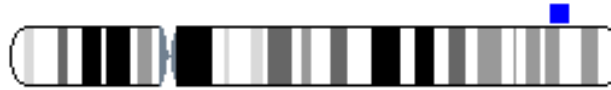

| <i>Band</i> | <i>Type of CNV + study population</i> | <i>Cytogenetic band positions</i>                        | <i>Size (bp)</i> | <i>Rating Phenotype</i> | <i>Number of cases</i>                        | <i>Reference</i>         |
|-------------|---------------------------------------|----------------------------------------------------------|------------------|-------------------------|-----------------------------------------------|--------------------------|
| 12q24.23    | Duplication found in male SZ patient. | 118,69 Mb – 118,71 Mb<br>(Exact boundaries from article) | 24,800           | ****                    | 14 SZ cases with each <i>de novo</i> mutation | Xu <i>et al.</i> 2008(3) |

## Chromosome 13

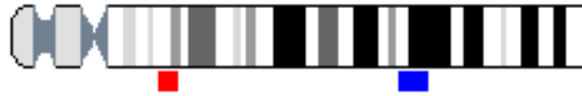

| <i>Band</i> | <i>Type of CNV + study population</i>          | <i>Cytogenetic band positions</i>                      | <i>Size (bp)</i> | <i>Rating Phenotype</i> | <i>Number of cases</i>            | <i>Reference</i>           |
|-------------|------------------------------------------------|--------------------------------------------------------|------------------|-------------------------|-----------------------------------|----------------------------|
| 13q13.1     | Deletion found in one male SZ patient.         | 31,15 Mb – 31,23 Mb<br>(Exact boundaries from article) | 83,507           | ****                    | 1                                 | Xu <i>et al.</i> 2009(9)   |
| 13q31.1     | Duplication found in sample of 1,013 SZ cases. | 79,33 Mb – 81,40 Mb<br>(Exact boundaries from article) | 2,067,794        | ****                    | 1,013 SZ cases and 1,084 controls | Need <i>et al.</i> 2009(8) |

## Chromosome 14

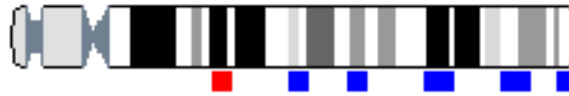

| <i>Band</i>    | <i>Type of CNV + study population</i>                                             | <i>Cytogenetic band positions</i>                        | <i>Size (bp)</i> | <i>Rating Phenotype</i> | <i>Number of cases</i>                        | <i>Reference</i>             |
|----------------|-----------------------------------------------------------------------------------|----------------------------------------------------------|------------------|-------------------------|-----------------------------------------------|------------------------------|
| 14q21.1        | Deletion found in one female SZ patient.                                          | 40,76 Mb – 40,83 Mb<br>(Exact boundaries from article)   | 64,962           | ****                    | 1                                             | Xu <i>et al.</i> 2009(9)     |
| 14q22.2        | Duplication found in SZ cases (first sample SZ and SA, second sample COS).        | 53,49 Mb – 53,77 Mb<br>(Exact boundaries from article)   | 282,769          | ****                    | 150 SZ cases and 268 controls                 | Walsh <i>et al.</i> 2008(6)  |
| 14q23.3        | Duplication in a post-mortem study of 105 SZ, BP and controls. Exclusion IQ < 70. | 64,00 Mb – 66,99 Mb<br>(BAC clone CTD-2055A23)           | 2,999,773        | **                      | 35 SZ cases                                   | Wilson <i>et al.</i> 2006(2) |
| 14q31.1        | Duplication found in sample of 447 SZ and 24 SA patients.                         | 80,66 Mb – 82,41 Mb<br>(Exact boundaries from article)   | 1,758,000        | ****                    | 447 SZ and 24 SA                              | Kirov <i>et al.</i> 2009(1)  |
| 14q32.13-q32.2 | Duplication found in male SZ patient.                                             | 93,83 Mb – 96,63 Mb<br>(Exact boundaries from article)   | 2,803,600        | ****                    | 14 SZ cases with each <i>de novo</i> mutation | Xu <i>et al.</i> 2008(3)     |
| 14q32.33       | Duplication found in sample of 447 SZ and 24 SA patients.                         | 104,81 Mb – 106,32 Mb<br>(Exact boundaries from article) | 1,506,000        | ****                    | 447 SZ and 24 SA                              | Kirov <i>et al.</i> 2009(1)  |



## Chromosome 15

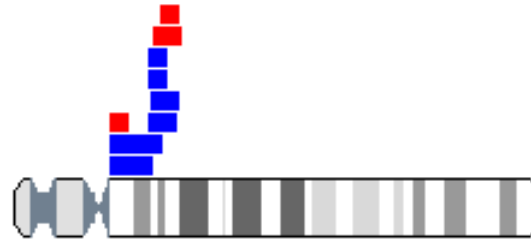

| <i>Band</i>   | <i>Type of CNV + study population</i>                                                                                                                                            | <i>Cytogenetic band positions</i>                      | <i>Size (bp)</i>         | <i>Rating Phenotype</i> | <i>Number of cases</i>             | <i>Reference</i>                         |
|---------------|----------------------------------------------------------------------------------------------------------------------------------------------------------------------------------|--------------------------------------------------------|--------------------------|-------------------------|------------------------------------|------------------------------------------|
| 15q11.2-q13.1 | Duplication found in sample of 447 SZ and 24 SA patients.                                                                                                                        | 21,25 Mb – 26,20 Mb<br>(Exact boundaries from article) | 4,950,000                | ****                    | 447 SZ and 24 SA                   | Kirov <i>et al.</i> 2009(1)              |
| 15q11.2-q13.1 | Duplication found in sample of 1,013 SZ cases.                                                                                                                                   | 21,26 Mb – 30,54 Mb<br>(Exact boundaries from article) | 9,041,890                | ****                    | 1,013 SZ cases and 1,084 controls  | Need <i>et al.</i> 2009(8)               |
| 15q11.2       | Deletion significantly associated with SZ (4,718 genotyped cases: 4,571 SZ, 39 unspecified functional psychosis, 86 SA, 10 schizophreniform, 12 persistent delusional disorders) | 20,31 Mb – 20,78 Mb<br>(Exact boundaries from article) | 470,000                  | ****                    | 4,718 SZ cases and 41,201 controls | Stefansson <i>et al.</i> 2008(7)         |
| 15q13.2-q13.3 | Duplication found in sample of 447 SZ and 24 SA patients.                                                                                                                        | 28,75 Mb – 30,23 Mb<br>(Exact boundaries from article) | 1,483,000                | ****                    | 447 SZ and 24 SA                   | Kirov <i>et al.</i> 2009(1)              |
| 15q13         | Duplication found in one SZ male. IQ = 73. No clinical features.                                                                                                                 | 25,70 Mb – 31,40 Mb<br>(approximate)                   | 994 (exact from article) | ****                    | 1                                  | Guilmatre <i>et al.</i> 2009(12)         |
| 15q13.1       | Duplication found in sample of 93 SZ patients. No MR.                                                                                                                            | 27,00 Mb – 28,40 Mb<br>(Exact boundaries from article) | 1,400,000                | ****                    | 93 SZ cases                        | Kirov <i>et al.</i> 2008(11)             |
| 15q13.1       | Duplication found in SZ male. No learning disabilities.                                                                                                                          | 27,26 Mb – 27,73 Mb<br>(Exact boundaries from article) | 468,600                  | ****                    | 1                                  | Rodriguez-Santiago <i>et al.</i> 2009(4) |

Table S3 J.E. Buizer-Voskamp *et al.* 122

|         |                                                                                                                                                                                   |                                                        |           |      |                                    |                                                |
|---------|-----------------------------------------------------------------------------------------------------------------------------------------------------------------------------------|--------------------------------------------------------|-----------|------|------------------------------------|------------------------------------------------|
| 15q13.3 | Deletions in nine SZ cases and no controls (3,391 SZ patients satisfying DSM-IV or IDC-10 compared to 3,181 matched controls).                                                    | 28,00 Mb – 31,00 Mb<br>(Exact boundaries from article) | 3,000,000 | **** | 3,391 SZ cases and 3,181 controls  | International Schizophrenia Consortium 2008(5) |
| 15q13.3 | Deletion significantly associated with SZ (4,718 genotyped cases: 4,571 SZ, 39 unspecified functional psychosis, 86 SA, 10 schizophreniform, 12 persistent delusional disorders). | 28,72 Mb – 30,30 Mb<br>(Exact boundaries from article) | 1,580,000 | **** | 4,718 SZ cases and 41,201 controls | Stefansson <i>et al.</i> 2008(7)               |

## Chromosome 16

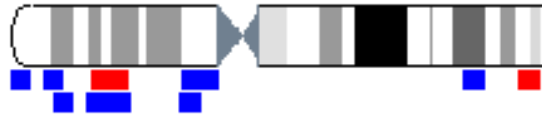

| Band           | Type of CNV + study population                                                     | Cytogenetic band positions                             | Size (bp)                | Rating Phenotype | Number of cases                                      | Reference                                |
|----------------|------------------------------------------------------------------------------------|--------------------------------------------------------|--------------------------|------------------|------------------------------------------------------|------------------------------------------|
| 16p13.3        | Duplication found in three SZ female. No learning disabilities.                    | 1,07 Mb – 1,07 Mb<br>(Exact boundaries from article)   | 5,000                    | ****             | 3                                                    | Rodriguez-Santiago <i>et al.</i> 2009(4) |
| 16p13.2        | Duplication found in male SZ patient.                                              | 6,89 Mb – 6,92 Mb<br>(Exact boundaries from article)   | 30,700                   | ****             | 14 SZ cases with each <i>de novo</i> mutation        | Xu <i>et al.</i> 2008(3)                 |
| 16p13.2        | Duplication found in male SZ patient.                                              | 8,12 Mb – 8,41 Mb<br>(Exact boundaries from article)   | 297,100                  | ****             | 14 SZ cases with each <i>de novo</i> mutation        | Xu <i>et al.</i> 2008(3)                 |
| 16p13.11-p12.3 | Deletion found in sample of 1,013 SZ cases.                                        | 15,39 Mb – 18,07 Mb<br>(Exact boundaries from article) | 2,685,165                | ****             | 1,013 SZ cases and 1,084 controls                    | Need <i>et al.</i> 2009(8)               |
| 16p13.1        | Duplications and deletions found in sample of 4,345 SZ cases.                      | 14,66 Mb – 18,70 Mb<br>(Exact boundaries from article) | 4,040,000                | ****             | 13 duplications in SZ cases; 5 deletions in SZ cases | Ingason <i>et al.</i> 2009(14)           |
| 16p11          | Duplication found in three SZ females. IQ = 56, 75 and not assessed for the third. | 27,60 Mb – 38,20 Mb<br>(approximate)                   | 500 (exact from article) | ****             | 3                                                    | Guilmatre <i>et al.</i> 2009(12)         |
| 16p11.2        | Duplications found in 4,551 SZ cases.                                              | 29,56 Mb – 30,11 Mb<br>(Exact boundaries from article) | 549,857                  | ****             | 4,551 SZ cases and 6,391 controls                    | McCarthy <i>et al.</i> 2009(15)          |
| 16q23.1        | Duplication found in SZ female. Learning disabilities present.                     | 76,76 Mb – 77,26 Mb<br>(Exact boundaries from article) | 507,900                  | ****             | 1                                                    | Rodriguez-Santiago <i>et al.</i> 2009(4) |
| 16q24.2        | Deletion found in one male SZ patient.                                             | 85,84 Mb – 85,90 Mb<br>(Exact boundaries from article) | 55,426                   | ****             | 1                                                    | Xu <i>et al.</i> 2009(9)                 |

## Chromosome 17

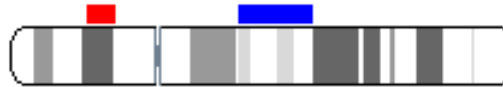

| <i>Band</i> | <i>Type of CNV + study population</i>                            | <i>Cytogenetic band positions</i>                      | <i>Size (bp)</i>         | <i>Rating Phenotype</i> | <i>Number of cases</i> | <i>Reference</i>                 |
|-------------|------------------------------------------------------------------|--------------------------------------------------------|--------------------------|-------------------------|------------------------|----------------------------------|
| 17p12       | Deletion found in sample of 447 SZ and 24 SA patients.           | 14,05 Mb – 15,36 Mb<br>(Exact boundaries from article) | 1,309,000                | ****                    | 447 SZ and 24 SA       | Kirov <i>et al.</i> 2009(1)      |
| 17q21       | Duplication found in one SZ male. IQ = 90. No clinical features. | 35,40 Mb – 47,60 Mb<br>(approximate)                   | 627 (exact from article) | ****                    | 1                      | Guilmatre <i>et al.</i> 2009(12) |

## Chromosome 18

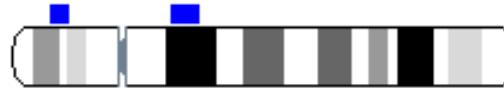

| <i>Band</i>     | <i>Type of CNV + study population</i>                                      | <i>Cytogenetic band positions</i>                      | <i>Size (bp)</i> | <i>Rating Phenotype</i> | <i>Number of cases</i>        | <i>Reference</i>            |
|-----------------|----------------------------------------------------------------------------|--------------------------------------------------------|------------------|-------------------------|-------------------------------|-----------------------------|
| 18p11.31-p11.23 | Duplication found in SZ cases (first sample SZ and SA, second sample COS). | 7,07 Mb – 7,57 Mb<br>(Exact boundaries from article)   | 495,017          | ****                    | 150 SZ cases and 268 controls | Walsh <i>et al.</i> 2008(6) |
| 18q12.1         | Duplication found in sample of 447 SZ and 24 SA patients.                  | 26,18 Mb – 27,57 Mb<br>(Exact boundaries from article) | 1,384,000        | ****                    | 447 SZ and 24 SA              | Kirov <i>et al.</i> 2009(1) |

## Chromosome 19

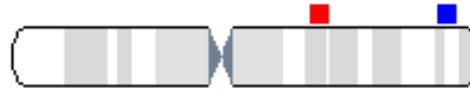

| <i>Band</i>     | <i>Type of CNV + study population</i>                                      | <i>Cytogenetic band positions</i>                      | <i>Size (bp)</i> | <i>Rating Phenotype</i> | <i>Number of cases</i>                        | <i>Reference</i>            |
|-----------------|----------------------------------------------------------------------------|--------------------------------------------------------|------------------|-------------------------|-----------------------------------------------|-----------------------------|
| 19q13.12        | Deletion found in female SZ patient.                                       | 42,01 Mb – 42,19 Mb<br>(Exact boundaries from article) | 178,500          | ****                    | 14 SZ cases with each <i>de novo</i> mutation | Xu <i>et al.</i> 2008(3)    |
| 19q13.41-q13.42 | Duplication found in SZ cases (first sample SZ and SA, second sample COS). | 59,05 Mb – 59,36 Mb<br>(Exact boundaries from article) | 317,744          | ****                    | 150 SZ cases and 268 controls                 | Walsh <i>et al.</i> 2008(6) |

**Chromosome 20**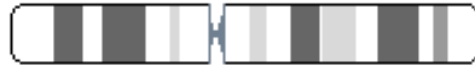

| <i>Band</i>                             | <i>Type of CNV + study population</i> | <i>Cytogenetic band positions</i> | <i>Size (bp)</i> | <i>Rating Phenotype</i> | <i>Number of cases</i> | <i>Reference</i> |
|-----------------------------------------|---------------------------------------|-----------------------------------|------------------|-------------------------|------------------------|------------------|
| <b><u>No CNVs for chromosome 20</u></b> |                                       |                                   |                  |                         |                        |                  |

**Chromosome 21**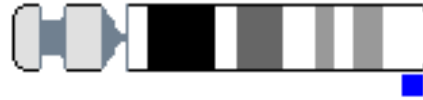

| <i>Band</i> | <i>Type of CNV + study population</i>     | <i>Cytogenetic band positions</i>                      | <i>Size (bp)</i> | <i>Rating Phenotype</i> | <i>Number of cases</i> | <i>Reference</i>         |
|-------------|-------------------------------------------|--------------------------------------------------------|------------------|-------------------------|------------------------|--------------------------|
| 21q22.3     | Duplication found in one male SZ patient. | 45,33 Mb – 45,37 Mb<br>(Exact boundaries from article) | 42,633           | ****                    | 1                      | Xu <i>et al.</i> 2009(9) |



## Chromosome 22

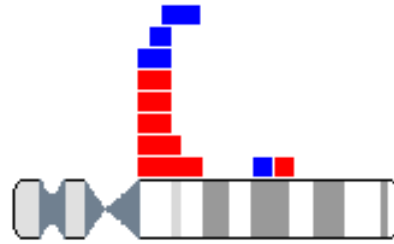

| <i>Band</i> | <i>Type of CNV + study population</i>                                                                                              | <i>Cytogenetic band positions</i>                                                                    | <i>Size (bp)</i>                    | <i>Rating Phenotype</i> | <i>Number of cases</i>                        | <i>Reference</i>                               |
|-------------|------------------------------------------------------------------------------------------------------------------------------------|------------------------------------------------------------------------------------------------------|-------------------------------------|-------------------------|-----------------------------------------------|------------------------------------------------|
| 22q11       | Deletion found in one SZ female. No dysmorphisms or IQ known.                                                                      | 11,80 Mb – 24,30 Mb<br>(approximate)                                                                 | 350 (exact from article)            | ****                    | 1                                             | Guilmatre <i>et al.</i> 2009(12)               |
| 22q11.2     | Deletions in thirteen SZ cases and no controls (3,391 SZ patients satisfying DSM-IV or IDC-10 compared to 3,181 matched controls). | 17,00 Mb – 21,00 Mb<br>(Exact boundaries from article)                                               | 4,000,000                           | ****                    | 3,391 SZ cases and 3,181 controls             | International Schizophrenia Consortium 2008(5) |
| 22q11.21    | Deletion found in male SZ patient, female SA, and female SZ patient.                                                               | 17,40 Mb – 20,00 Mb<br>17,05 Mb – 18,59 Mb<br>17,39 Mb – 18,83 Mb<br>(Exact boundaries from article) | 2,593,900<br>1,533,800<br>1,444,500 | ****                    | 14 SZ cases with each <i>de novo</i> mutation | Xu <i>et al.</i> 2008(3)                       |
| 22q11.21    | Deletion found in sample of 447 SZ and 24 SA patients.                                                                             | 17,28 Mb – 19,79 Mb<br>(Exact boundaries from article)                                               | 2,516,000                           | ****                    | 447 SZ and 24 SA                              | Kirov <i>et al.</i> 2009(1)                    |
| 22q11.21    | Deletion and duplication found in sample of 1,013 SZ cases.                                                                        | 17,26 Mb – 19,79 Mb<br>(Exact boundaries from article)                                               | 22,534,567                          | ****                    | 1,013 SZ cases and 1,084 controls             | Need <i>et al.</i> 2009(8)                     |
| 22q11.21    | Duplication found in SZ male. Learning disabilities present.                                                                       | 19,42 Mb – 19,79 Mb<br>(Exact boundaries from article)                                               | 367,500                             | ****                    | 1                                             | Rodriguez-Santiago <i>et al.</i> 2009(4)       |

Table S3 J.E. Buizer-Voskamp *et al.* 130

|          |                                                                                                   |                                                        |           |      |                               |                                          |
|----------|---------------------------------------------------------------------------------------------------|--------------------------------------------------------|-----------|------|-------------------------------|------------------------------------------|
| 22q11.23 | Duplication found in SZ male and SZ female. Male presents learning disabilities, female does not. | 21,34 Mb – 23,33 Mb<br>(Exact boundaries from article) | 1,900,000 | **** | 2                             | Rodriguez-Santiago <i>et al.</i> 2009(4) |
| 22q12.3  | Duplication found in SZ cases (first sample SZ and SA, second sample COS).                        | 32,05 Mb – 32,72 Mb<br>(Exact boundaries from article) | 666,705   | **** | 150 SZ cases and 268 controls | Walsh <i>et al.</i> 2008(6)              |
| 22q12.3  | Deletion in a post-mortem study of 105 SZ, BP and controls. Exclusion IQ < 70.                    | 35,23 Mb – 35,35 Mb<br>(BAC clone CTD-2055A23)         | 113,509   | **   | 35 SZ cases                   | Wilson <i>et al.</i> 2006(2)             |

## Chromosome X

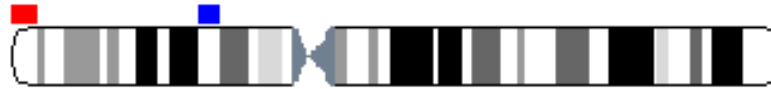

| <i>Band</i>   | <i>Type of CNV + study population</i>                             | <i>Cytogenetic band positions</i>                    | <i>Size (bp)</i>        | <i>Rating Phenotype</i> | <i>Number of cases</i> | <i>Reference</i>                 |
|---------------|-------------------------------------------------------------------|------------------------------------------------------|-------------------------|-------------------------|------------------------|----------------------------------|
| Xp22.33-p21.3 | Deletion found in sample of 447 SZ and 24 SA patients.            | 0,32 Mb – 2,73 Mb<br>(Exact boundaries from article) | 2,402,000               | ****                    | 447 SZ and 24 SA       | Kirov <i>et al.</i> 2009(1)      |
| Xp11.4        | Duplication found in one SZ male. IQ = 105. No clinical features. | 37,50 Mb – 42,30 Mb<br>(approximate)                 | 56 (exact from article) | ****                    | 1                      | Guilmatre <i>et al.</i> 2009(12) |

## Chromosome Y

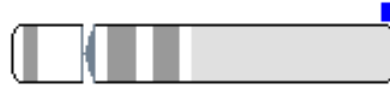

| <i>Band</i> | <i>Type of CNV + study population</i>                                      | <i>Cytogenetic band positions</i>                      | <i>Size (bp)</i> | <i>Rating Phenotype</i> | <i>MR (IQ if mentioned)?</i> | <i>MPA (type)?</i> | <i>Number of cases</i>        | <i>Reference</i>            |
|-------------|----------------------------------------------------------------------------|--------------------------------------------------------|------------------|-------------------------|------------------------------|--------------------|-------------------------------|-----------------------------|
| Yq12        | Duplication found in SZ cases (first sample SZ and SA, second sample COS). | 57,57 Mb – 57,72 Mb<br>(Exact boundaries from article) | 152,391          | ****                    | -                            | -                  | 150 SZ cases and 268 controls | Walsh <i>et al.</i> 2008(6) |

## References

1. Kirov G, Grozeva D, Norton N, Ivanov D, Mantripragada K, Holmans P, *et al.* (2009): Support for the involvement of large copy number variants in the pathogenesis of schizophrenia. *Hum Mol Genet* 18: 1497-1503.
2. Wilson G, Flibotte S, Chopra V, Melnyk B, Honer W, Holt R (2006): DNA copy-number analysis in bipolar disorder and schizophrenia reveals aberrations in genes involved in glutamate signaling. *Hum Mol Genet* 15: 743-749.
3. Xu B, Roos J, Levy S, van Rensburg E, Gogos J, Karayiorgou M (2008): Strong association of de novo copy number mutations with sporadic schizophrenia. *Nat Genet* 40: 880-885.
4. Rodriguez-Santiago B, Brunet A, Sobrino B, Serra-Juhé C, Flores R, Armengol L, *et al.* (2010): Association of common copy number variants at the glutathione S-transferase genes and rare novel genomic changes with schizophrenia. *Mol Psychiatry* 15:1023-33.
5. The International Schizophrenia Consortium (2008): Rare chromosomal deletions and duplications increase risk of schizophrenia. *Nature* 455: 237-241.
6. Walsh T, McClellan J, McCarthy S, Addington A, Pierce S, Cooper G, *et al.* (2008): Rare structural variants disrupt multiple genes in neurodevelopmental pathways in schizophrenia. *Science* 320: 539-543.
7. Stefansson H, Rujescu D, Cichon S, Pietiläinen O, Ingason A, Steinberg S, *et al.* (2008): Large recurrent microdeletions associated with schizophrenia. *Nature* 455: 232-236.
8. Need A, Ge D, Weale M, Maia J, Feng S, Heinzen E, *et al.* (2009): A genome-wide investigation of SNPs and CNVs in schizophrenia. *PLoS Genet* 5: e1000373.
9. Xu B, Woodroffe A, Rodriguez-Santiago B, Louw Roos J, van Rensburg E, Abecasis G, *et al.* (2009): Elucidating the genetic architecture of familial schizophrenia using rare copy number variant and linkage scans. *PNAS* 106: 16746-16751.

10. Vrijenhoek T, Buizer-Voskamp JE, van der Stelt I, Strengman E, GROUP Consortium, Sabatti C, *et al.* (2008): Recurrent CNVs disrupt three candidate genes in schizophrenia patients. *Am J Med Genet Part B* 83: 504-510.
11. Kirov G, Gumus D, Chen W, Norton N, Georgieva L, Sari M, *et al.* (2008): Comparative genome hybridization suggests a role for *NRXN1* and *APBA2* in schizophrenia. *Hum Mol Genet* 17: 458-465.
12. Guilmatre A, Dubourg D, Mosca A, Legallic S, Goldenberg A, Drouin-Garraud V, *et al.* (2009): Recurrent rearrangements in synaptic and neurodevelopmental genes and shared biologic pathways in schizophrenia, autism, and mental retardation. *Arch Gen Psychiatry* 66: 947-956.
13. Friedman J, Vrijenhoek T, Markx S, Janssen I, van der Vliet W, Faas B, *et al.* (2008): *CNTNAP2* gene dosage variation is associated with schizophrenia and epilepsy. *Mol Psychiatry* 13:261-6.
14. Ingason A, Rujescu D, Cichon S, Sigurdsoon E, Sigmundsson T, Pietiläinen O, *et al.* (2011): Copy number variations of chromosome 16p13.1 region associated with schizophrenia. *Mol Psychiatry* 16:17-25.
15. McCarthy S, Makarov V, Kirov G, Addington A, McClellan J, Yoon W, *et al.* (2009): Microduplications of 16p11.2 are associated with schizophrenia. *Nat Genet* 41: 1223-1227.

**Table S4. Cytogenetic Abnormalities in Schizophrenia from Literature****Notes:**1) Abbreviations:

Type of mutation: + Gain, - Loss, = Balanced; MR = Mental Retardation, MPA = Minor Physical Anomalies, F = Facial, O = Other, SZ = Schizophrenia, BP = Bipolar Disorder, SA = Schizoaffective Disorder, COS = Childhood-onset Schizophrenia, SADS-L = Schedule for Affective Disorders and Schizophrenia—Lifetime Version, PAS-ADD = Psychiatric Assessment Schedules for Adults with Developmental Disabilities

- 2) Case report studies can be tracked in the chromosome ideogram by identifying bars with the same color. Thicker bars resemble multiple cases described in the same paper.
- 3) In the case of a translocation, the case entry can be tracked for both chromosome ideograms, identified by the same bar color.
- 4) In the case of a fine-mapping study, the most recent fine-mapping study can be tracked in the chromosome ideogram. The original study and possible other fine-mapping studies are only mentioned in the table, not in the figure.
- 5) Phenotype rating is based upon the following criteria:
 

| <b>Quality of phenotype</b> | <b>Criteria</b>                                                                                                                                  |
|-----------------------------|--------------------------------------------------------------------------------------------------------------------------------------------------|
| ****                        | Validated checklist and diagnosis according to DSM or ICD classification                                                                         |
| ***                         | Clinical description suggestive for schizophrenia and diagnosis according to DSM or ICD classification                                           |
| **                          | Diagnosis according to DSM or ICD classification only, OR clinical description suggestive for schizophrenia and diagnosis without classification |
| *                           | Clinical description suggestive for schizophrenia, but no formal diagnosis, OR diagnosis without clinical description or classification          |
- 6) In each case, the optimal identification of the molecular boundaries of the cytogenetic abnormalities is presented using a megabase (Mb) scale. When available, positions of molecular markers or DNA-probes were used. In cases where only a karyotype was available, the relevant chromosome bands were used to obtain the approximate molecular boundaries.

**Methods:**

In addition to the PubMed and MEDLINE search, the reference lists of original articles, review articles (1-5), and abstracts from the major genetic conferences from 2000 onwards on this topic were scanned to identify any articles missed by the computerized search. We considered only studies published in an English-language, peer-reviewed, indexed scientific journal. Cases involving fragile sites (e.g. a chromosomal abnormality induced by a substance such as low folate medium), chromosomal mosaicism, or aneuploidy (aberrant number of chromosomes) were excluded. Studies in which schizophrenia cases were entangled with cases with other psychiatric diagnoses were also excluded. Other exclusion criteria were negative findings, no distinct description of the chromosomal aberration, and base-pair boundaries that could not be determined, e.g. because of obsolete nomenclature of the chromosomal aberration. Mental retardation and minor physical anomalies were scored. All the karyotype descriptions are presented according to the International System for Human

Cytogenetic Nomenclature 1995 (ISCN 1995). Identification of the cytogenetic abnormalities by base-pair boundaries was performed using probe or marker information in combination with the UCSC genome browser. If molecular cytogenetic information was lacking, the base-pair boundaries were defined based on the karyotype descriptions. In such cases, the sequence positions of the relevant chromosome bands were used to obtain the approximate molecular boundaries of the cytogenetic abnormality.

### *22q11*

Having a deletion at 22q11 is the highest risk factor known for developing schizophrenia. In light of the evidence for suggestive linkage for schizophrenia on chromosome 22, many studies have been performed and evaluated patients with the 22q11 deletion syndrome for psychiatric symptoms or disorders. A recent review of eight studies provided a prevalence estimation of a total of sixteen cases with 22q11.2 deletion, identified in 2,133 patients with schizophrenia (6). Because of the great number of studies, we included this prevalence study (6), an overview study for the different forms of the 22q11.2 deletion (7), and one fine-mapping study (8) as examples of all the studies performed. Since the 22q11 deletion region was not the main focus of this review (nor other known syndromes co-occurring with schizophrenia symptomatology), we felt we were justified in including recent overview studies in order to summarize the work done on this region.

### **Results:**

We compiled and assessed 44 case reports encompassing 64 schizophrenia cases. In this review, 16 out of 64 (25%) cases showed mental retardation, 21 (32.8%) cases had minor physical anomalies, and a total of 24 (37.5%) cases showed one of these abnormal phenotypes.



## Chromosome 1

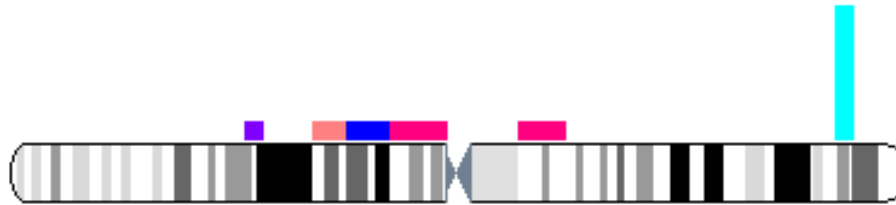

| Band              | Karyotype (type of mutation) | Cytogenetic band positions                                                                                                   | Size (bp)  | Rating Phenotype                        | MR (IQ if mentioned)? | MPA (type)? | Number of cases | Reference                       |
|-------------------|------------------------------|------------------------------------------------------------------------------------------------------------------------------|------------|-----------------------------------------|-----------------------|-------------|-----------------|---------------------------------|
| 1p31.2            | 46,XY,t(1;16)(p31.2;q21) (=) |  65,95<br>Mb – 69,97<br>Mb (approximate)    | 4,027,319  | **                                      | -                     | -           | 1               | Millar <i>et al.</i> 2005(9)    |
| 1p22 <sup>4</sup> | 46,XY,t(1;7)(p22;q21) (=)    |  85,18<br>Mb – 95,15<br>Mb (approximate)    | 9,967,614  | ****                                    | Yes (74)              | Yes (F + O) | 1               | Idol <i>et al.</i> 2008(10)     |
| 1p22 <sup>4</sup> | 46,XY,t(1;7)(p22;q22) (=)    |  85,18<br>Mb – 95,15<br>Mb (approximate)    | 9,967,614  | See Idol <i>et al.</i> 2008 in row 1p22 |                       |             |                 | Gordon <i>et al.</i> 1994(11)   |
| 1p21              | 46,XY,t(1;4)(p21;p14) (=)    |  95,15<br>Mb – 107,63<br>Mb (approximate)   | 12,484,688 | **                                      | Yes                   | Yes (F)     | 1               | Cordeiro <i>et al.</i> 2007(12) |
| 1p1 <sup>5</sup>  | 46,XY,inv(1)(p1;q21) (=)     |  107,00<br>Mb – 124,30<br>Mb (approximate)  | 17,300,000 | *                                       | Yes (V:75 and p:67)   | No          | 1               | Price <i>et al.</i> 1976(13)    |
| 1q21 <sup>5</sup> | 46,XY,inv(1)(p1;q21) (=)     |  142,40<br>Mb – 153,30<br>Mb (approximate) | 10,899,999 | See Price <i>et al.</i> 1976 in row 1p1 |                       |             |                 | Price <i>et al.</i> 1976(13)    |

<sup>4</sup> The study of Idol *et al.* is a fine-mapping study of the study of Gordon *et al.* Only the fine-mapping study (Idol) is shown in the figure. See also chromosome 7.

<sup>5</sup> This study describes four male cases with SZ. Two male cases showed 45,XY,t(13q;14q) and 46,XY,17p+, respectively. Because the translocations were not further specified, it was not possible to set breakpoints. Therefore, these cases are not present in the table. The other two cases showed 46,XY,t(7;8)(p12;p23)mar, and 46,XY,inv(1)(p1q21). These cases can be found in the table of the corresponding chromosomes. Case entries can be tracked down in the chromosome ideogram by their own color.

|                     |                                            |                                                                                                                                                                                  |                 |                                              |   |   |                                         |                                  |
|---------------------|--------------------------------------------|----------------------------------------------------------------------------------------------------------------------------------------------------------------------------------|-----------------|----------------------------------------------|---|---|-----------------------------------------|----------------------------------|
| 1q42.2 <sup>6</sup> | 46,XY or 46,XX,t(1;11)<br>(q42.2; q21) (=) |  228,90<br>Mb – 234,33<br>Mb (Breakpoints<br>between D1S103<br>and D1S8)                        | 5,423,523       | See Blackwood <i>et al.</i> 2001 in row 1q42 |   |   | Fletcher <i>et al.</i><br>1993(14)      |                                  |
| 1q42.2 <sup>6</sup> | 46,XY or 46,XX,t(1;11)<br>(q42.2; q21) (=) |  230,02<br>Mb – 230,02<br>Mb (Breakpoints<br>between D1S1621<br>and D78808; 7,3 kb<br>fragment) | 7,300           | See Blackwood <i>et al.</i> 2001 in row 1q42 |   |   | Millar <i>et al.</i><br>2000(15)        |                                  |
| 1q43 <sup>6</sup>   | 46,XY or<br>46,XX,t(1;11)(q43;q21)<br>(=)  |  234,60<br>Mb – 241,70<br>Mb (approximate)                                                      | 7,099,999       | See Blackwood <i>et al.</i> 2001 in row 1q42 |   |   | St Clair <i>et al.</i><br>1990(16)      |                                  |
| 1q42 <sup>6,7</sup> | 46,XY or 46,XX,t(1;11)<br>(q42; q14.3) (=) |  222,10<br>Mb – 234,60<br>Mb (approximate)                                                      | 212,499,99<br>9 | ****                                         | - | - | 7 SZ cases<br>with<br>translocati<br>on | Blackwood <i>et al.</i> 2001(17) |

<sup>6</sup> The studies of Fletcher *et al.*, Millar *et al.*, and Blackwood *et al.* are follow-up studies of the study of St. Clair *et al.* Only the most recent follow-up study (Blackwood) is shown in the figure. See also chromosome 11.

<sup>7</sup> This study describes 7 SZ cases within one family carrying the translocation. The thicker bar indicates the multiple cases involved. See also chromosome 11.

## Chromosome 2

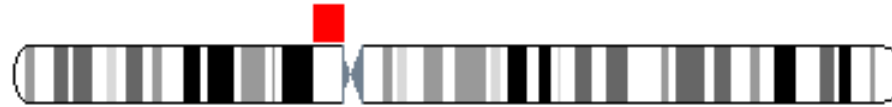

| <i>Band</i>         | <i>Karyotype (type of mutation)</i>          | <i>Cytogenetic band positions</i>       | <i>Size (bp)</i> | <i>Rating Phenotype</i> | <i>MR (IQ if mentioned)?</i> | <i>MPA (type)?</i> | <i>Number of cases</i> | <i>Reference</i>               |
|---------------------|----------------------------------------------|-----------------------------------------|------------------|-------------------------|------------------------------|--------------------|------------------------|--------------------------------|
| 2p11.2 <sup>8</sup> | 46, XY and 46, XX, t(2;18) (p11.2;p11.2) (=) | 83,21<br>Mb – 90,90<br>Mb (approximate) | 7,691,536        | ****                    | -                            | -                  | 2                      | Maziade <i>et al.</i> 1993(18) |

<sup>8</sup> In this study, one female case and one male case are described. Both cases have been diagnosed according to the DSM-III. Case entries can be tracked in the chromosome ideogram by identifying the thicker bar in the corresponding color. See also chromosome 18.

**Chromosome 3**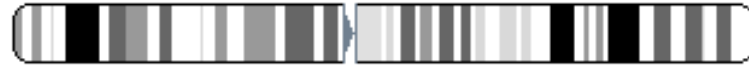

| <i>Band</i>                                          | <i>Karyotype (type of mutation)</i> | <i>Cytogenetic band positions</i> | <i>Size (bp)</i> | <i>Rating Phenotype</i> | <i>MR (IQ if mentioned)?</i> | <i>MPA (type)?</i> | <i>Number of cases</i> | <i>Reference</i> |
|------------------------------------------------------|-------------------------------------|-----------------------------------|------------------|-------------------------|------------------------------|--------------------|------------------------|------------------|
| <i>No cytogenetic abnormalities for chromosome 3</i> |                                     |                                   |                  |                         |                              |                    |                        |                  |

## Chromosome 4

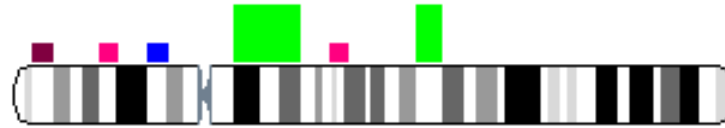

| Band              | Karyotype (type of mutation)    | Cytogenetic band positions                                                                                | Size (bp)  | Rating Phenotype                             | MR (IQ if mentioned)? | MPA (type)? | Number of cases | Reference                       |
|-------------------|---------------------------------|-----------------------------------------------------------------------------------------------------------|------------|----------------------------------------------|-----------------------|-------------|-----------------|---------------------------------|
| 4p16.1            | 46,XY,t(4;13)(p16.1;q21.31) (=) | <span style="color:red">■</span> 5,90 Mb – 10,99 Mb (approximate)                                         | 5,096,051  | ****                                         | -                     | -           | 1               | Itokawa <i>et al.</i> 2004(19)  |
| 4p15.2            | 46,XY,inv(4)(p15.2;q21.3) (=)   | <span style="color:blue">■</span> 22,68 Mb – 27,88 Mb (approximate)                                       | 5,195,975  | ***                                          | No (91)               | Yes (F + O) | 1               | Palmour <i>et al.</i> 1994(20)  |
| 4p14              | 46,XY,t(1;4)(p21;p14) (=)       | <span style="color:green">■</span> 35,57 Mb – 41,07 Mb (approximate)                                      | 5,495,742  | See Cordeiro <i>et al.</i> 2007 in row 1p21  |                       |             |                 | Cordeiro <i>et al.</i> 2007(12) |
| 4q13 <sup>9</sup> | 46,XX,Inv (4)(q13;q25) (=)      | <span style="color:blue">■</span> 59,65 Mb – 76,54 Mb (Approximate. Close markers D4S3004 and D4S2987)    | 16,886,918 | ****                                         | -                     | -           | 3               | Mensah <i>et al.</i> 2007(21)   |
| 4q21.3            | 46,XY,inv(4)(p15.2;q21.3) (=)   | <span style="color:red">■</span> 87,23 Mb – 88,33 Mb (approximate)                                        | 1,099,148  | See Palmour <i>et al.</i> 1994 in row 4p15.2 |                       |             |                 | Palmour <i>et al.</i> 1994(20)  |
| 4q25 <sup>9</sup> | 46,XX,Inv (4)(q13;q25) (=)      | <span style="color:green">■</span> 107,92 Mb – 114,31 Mb (Approximate. Close markers D4S1616 and D4S2989) | 6,395,045  | See Mensah <i>et al.</i> 2007 in row 4q13    |                       |             |                 | Mensah <i>et al.</i> 2007(21)   |

<sup>9</sup> In this study, three female cases are described with the inversion and schizophrenia. All cases have been diagnosed according to the DSM-IV. Case entries can be tracked in the chromosome ideogram by identifying the thicker bar in the corresponding color.

## Chromosome 5

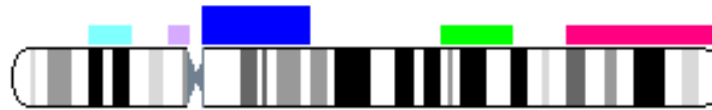

| Band                         | Karyotype (type of mutation)                   | Cytogenetic band positions                                                                                                           | Size (bp)  | Rating Phenotype | MR (IQ if mentioned)? | MPA (type)?            | Number of cases | Reference                        |
|------------------------------|------------------------------------------------|--------------------------------------------------------------------------------------------------------------------------------------|------------|------------------|-----------------------|------------------------|-----------------|----------------------------------|
| 5p14                         | 46,XX,+5p14                                    | <span style="color: cyan;">■</span> 18,50 Mb – 29,30 Mb (approximate)                                                                | 10,798,804 | ****             | Yes (79)              | Yes (F + O)            | 1               | Malaspina <i>et al.</i> 1992(22) |
| 5p12                         | 46,XY,del(5)(p11;p12) (-)                      | <span style="color: purple;">■</span> 44,78 – 46,44 Mb (Exact boundaries from article)                                               | 1,700,000  | ****             | Yes (72)              | -                      | 1               | Mizuguchi <i>et al.</i> 2008(23) |
| 5q11.2 – q13.3 <sup>10</sup> | 46,XY,der(1)inv ins(1;5)(q32.3;q13.3q11.2) (+) | <span style="color: blue;">■</span> 50,49 Mb – 76,89 Mb (approximate)                                                                | 26,397,080 | ***              | No                    | Yes (F + O) both cases | 2               | Bassett <i>et al.</i> 1988(24)   |
| 5q22 – q23.2                 | 46,XX,del(5)(q22-q23.2) (-)                    | <span style="color: green;">■</span> 117,30 Mb – 128,22 Mb (Approximate. Deletion of markers D5S639, D5S471, D5S622, D5S804, D5S642) | 10,919,673 | ***              | Yes (69)              | Yes (F + O)            | 1               | Bennett <i>et al.</i> 1997(25)   |
| 5q32-qter                    | 46,XX iUPD 5q32-qter (=)                       | <span style="color: magenta;">■</span> 144,48 Mb – 180,84 Mb (Approximate. Markers involved: D5S140, D5S422, D5S400, D5S408)         | 36,353,845 | ****             | Yes (47)              | -                      | 1               | Seal <i>et al.</i> 2006(26)      |

<sup>10</sup> In this study, two male cases are described. Both cases are diagnosed according to the ICD-9 and the DSM-III. Case entries can be tracked in the chromosome ideogram by identifying the thicker bar in the corresponding color.

## Chromosome 6

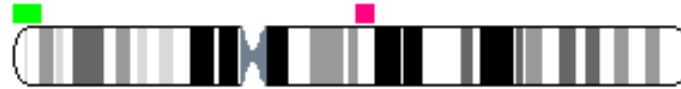

| Band                 | Karyotype (type of mutation) | Cytogenetic band positions                                                                        | Size (bp) | Rating Phenotype                              | MR (IQ if mentioned)? | MPA (type)? | Number of cases | Reference                        |
|----------------------|------------------------------|---------------------------------------------------------------------------------------------------|-----------|-----------------------------------------------|-----------------------|-------------|-----------------|----------------------------------|
| 6pter-p25            | 46,XX,del(6)(p25-pter) (-)   | <span style="color: green;">■</span> Pter-7,00 MB (6,7 Mb ~D6S1159 – STSG26237)                   | 6,996,777 | ***                                           | Yes (53)              | Yes (F + O) | 1               | Caluseriu <i>et al.</i> 2006(27) |
| 6q14.2 <sup>11</sup> | 46,XX,t(6;11)(q14.2;q25) (=) | <span style="background-color: #cccccc;">■</span> 83,86 Mb – 84,66 MB (approximate)               | 799,631   | <i>See Jeffries et al. 2003 in row 6q14.2</i> |                       |             |                 | Holland <i>et al.</i> 1990(28)   |
| 6q14.2 <sup>11</sup> | 46,XX,t(6;11)(q14.2;q25) (=) | <span style="color: magenta;">■</span> 87,02 Mb – 87,16 Mb (Exact boundaries; within AL390125.23) | 140,781   | ****                                          | No                    | -           | 1               | Jeffries <i>et al.</i> 2003(29)  |

<sup>11</sup> The study of Jeffries *et al.* is a fine-mapping study of the breakpoints of the translocation of Holland *et al.* Only the fine-mapping study (Jeffries) is shown in the figure. See also chromosome 11.

## Chromosome 7

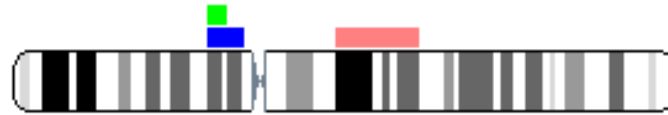

| Band               | Karyotype (type of mutation)                     | Cytogenetic band positions                                                                                                                                                   | Size (bp)  | Rating Phenotype                        | MR (IQ if mentioned)? | MPA (type)? | Number of cases | Reference                     |
|--------------------|--------------------------------------------------|------------------------------------------------------------------------------------------------------------------------------------------------------------------------------|------------|-----------------------------------------|-----------------------|-------------|-----------------|-------------------------------|
| 7p12 <sup>12</sup> | 46,XY,t(7,8)(p12;p23) mar (=)                    |  46,60 Mb – 53,90 Mb (approximate)                                                          | 7,299,999  | *                                       | -                     | No          | 1               | Price <i>et al.</i> 1976(13)  |
| 7p12.3             | 46,XY,inv(7)(p12.3;q21.11) t(7,8)(p12.3;p23) (=) |  46,60 Mb – 49,80 Mb (approximate)                                                          | 3,200,000  | **                                      | -                     | -           | 1               | Knight <i>et al.</i> 2009(30) |
| 7q21 <sup>13</sup> | 46,XY,t(1;7)(p22;q21) (=)                        |  77,29 Mb – 97,72 Mb (Approximate. A 16 kb region between BAC RP11-454KO3 and CTB-RG016JO4) | 20,424,856 | See <i>Idol et al. 2008 in row 1p22</i> |                       |             |                 | <i>Idol et al.</i> 2008(10)   |
| 7q22 <sup>13</sup> | 46,XY,t(1;7)(p22;q22) (=)                        |  97,72 Mb – 107,03 Mb (approximate)                                                         | 9,311,331  | See <i>Idol et al. 2008 in row 1p22</i> |                       |             |                 | <i>Gordon et al.</i> 1994(11) |
| 7q21 <sup>13</sup> | 46,XY,t(1;7)(p22;q22) (=)                        |  82,63 Mb – 92,44 Mb (Markers D7S630, D7S2410, and D7S646)                                 | 9,807,552  | See <i>Idol et al. 2008 in row 1p22</i> |                       |             |                 | <i>Yan et al.</i> 2000(31)    |

<sup>12</sup> This study describes four male cases with SZ. Two male cases showed 45,XY,t(13q;14q) and 46,XY,17p+, respectively. Because the translocations were not further specified, it was not possible to set breakpoints. Therefore, these cases are not present in the table. The other two cases showed 46,XY,t(7;8)(p12;p23)mar, and 46,XY,inv(1)(p1q21). These cases can be found in the table of the corresponding chromosomes. Case entries can be tracked down in the chromosome ideogram by their own color.

<sup>13</sup> The studies of *Idol et al.* and *Yan et al.* are fine-mapping studies of the study of *Gordon et al.* Only the most recent fine-mapping study (*Idol*) is shown in the figure. See also chromosome 1.



## Chromosome 8

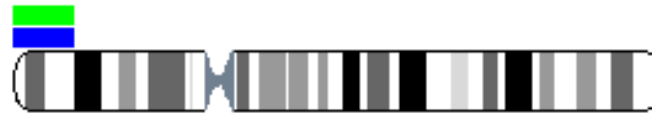

| Band               | Karyotype (type of mutation)                    | Cytogenetic band positions                                                                                         | Size (bp)  | Rating Phenotype | MR (IQ if mentioned)?                       | MPA (type)? | Number of cases | Reference                     |
|--------------------|-------------------------------------------------|--------------------------------------------------------------------------------------------------------------------|------------|------------------|---------------------------------------------|-------------|-----------------|-------------------------------|
| 8p23 <sup>14</sup> | 46,XY,t(7,8)(p12;p23) mar (=)                   |  Pter Mb – 12,70 Mb (approximate) | 12,700,000 |                  | See Price <i>et al.</i> 1976 in row 7p12    |             |                 | Price <i>et al.</i> 1976(13)  |
| 8p23               | 46,XY,inv(7)(p12.3;q21.11)t(7,8)(p12.3;p23) (=) |  Pter Mb – 12,70 Mb (approximate) | 12,700,000 |                  | See Knight <i>et al.</i> 2009 in row 7p12.3 |             |                 | Knight <i>et al.</i> 2009(30) |

<sup>14</sup> This study describes four male cases with SZ. Two male cases showed 45,XY,t(13q;14q) and 46,XY,17p+, respectively. Because the translocations were not further specified, it was not possible to set breakpoints. Therefore, these cases are not present in the table. The other two cases showed 46,XY,t(7;8)(p12;p23)mar, and 46,XY,inv(1)(p1q21). These cases can be found in the table of the corresponding chromosomes. Case entries can be tracked down in the chromosome ideogram by their own color.

## Chromosome 9

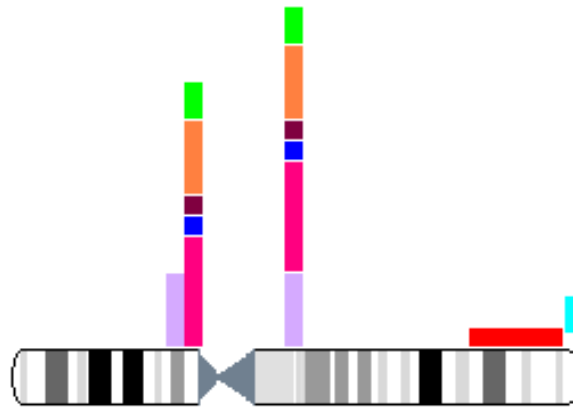

| Band               | Karyotype (type of mutation)        | Cytogenetic band positions        | Size (bp) | Rating Phenotype | MR (IQ if mentioned)? | MPA (type)? | Number of cases | Reference                      |
|--------------------|-------------------------------------|-----------------------------------|-----------|------------------|-----------------------|-------------|-----------------|--------------------------------|
| 9p12 <sup>15</sup> | 46,XY and 46,XX,inv(9)(p12;q13) (=) | 41,95 Mb – 44,79 Mb (approximate) | 2,837,297 | **               | -                     | -           | 4               | Toyota <i>et al.</i> 2001(32)  |
| 9p11 <sup>16</sup> | 46,XY and 46,XX,inv(9)(p11;q13) (=) | 44,79 Mb – 51,27 Mb (approximate) | 6,485,252 | **               | -                     | -           | 6               | Kunugi <i>et al.</i> 1999(33)  |
| 9p11               | 46,XY,inv(9)(p11;q13) (=)           | 44,79 Mb – 51,27 Mb (approximate) | 6,485,252 | ***              | No                    | -           | 1               | Lee <i>et al.</i> 1998(34)     |
| 9p11               | 46,XX,inv(9)(p11;q13) (=)           | 44,79 Mb – 51,27 Mb (approximate) | 6,485,252 | ****             | No (86)               | No          | 1               | Miyaoka <i>et al.</i> 1999(35) |
| 9p11 <sup>17</sup> | 46,XX or 46,XY,inv(9)(p11;q13) (=)  | 44,79 Mb – 51,27 Mb (approximate) | 6,485,252 | ***              | -                     | -           | 4               | Nanko 1993(36)                 |

<sup>15</sup> In this study, two female cases and two male cases are described. All cases are diagnosed according to the DSM-IV. Case entries can be tracked in the chromosome ideogram by identifying the thicker bar in the corresponding color. Another male patient showed 45,XY,der(14;21)(q10;q10). This case can be found in the tables for the corresponding chromosomes.

<sup>16</sup> In this study, three female cases and three male cases are described. All cases are diagnosed according to the DSM-IV. Case entries can be tracked in the chromosome ideogram by identifying the thicker bar in the corresponding color.

<sup>17</sup> In this study, three female cases and one male case are described. All cases are diagnosed according to the DSM-III. Case entries can be tracked in the chromosome ideogram by identifying the thicker bar in the corresponding color.

|                    |                                         |                                                                                                                             |            |                                            |          |               |   |                                 |
|--------------------|-----------------------------------------|-----------------------------------------------------------------------------------------------------------------------------|------------|--------------------------------------------|----------|---------------|---|---------------------------------|
| 9p11 <sup>18</sup> | 46,XY,inv(9)(p11;q13)<br>(=)            |  44,79<br>Mb – 51,27<br>Mb (approximate)   | 6,485,252  | **                                         | -        | -             | 2 | Demirhan <i>et al.</i> 2003(37) |
| 9q13 <sup>15</sup> | 46,XY and 46,XX,inv(9)<br>(p12;q13) (=) |  68,40<br>Mb – 69,51<br>Mb (approximate)   | 1,114,652  | <i>See Toyota et al. 2001 in row 9p12</i>  |          |               |   | Toyota <i>et al.</i> 2001(32)   |
| 9q13 <sup>16</sup> | 46,XY and 46,XX,<br>inv(9)(p11;q13) (=) |  68,40<br>Mb – 69,51<br>MB (approximate)   | 1,114,652  | <i>See Kunugi et al. 1999 in row 9p11</i>  |          |               |   | Kunugi <i>et al.</i> 1999(33)   |
| 9q13               | 46,XY,inv(9)(p11;q13)<br>(=)            |  68,40<br>Mb – 69,51<br>MB (approximate)   | 1,114,652  | <i>See Lee et al. 1998 in row 9p11</i>     |          |               |   | Lee <i>et al.</i> 1998(34)      |
| 9q13               | 46,XX,inv(9)(p11;q13)<br>(=)            |  68,40<br>Mb – 69,51<br>MB (approximate)   | 1,114,652  | <i>See Miyaoka et al. 1999 in row 9p11</i> |          |               |   | Miyaoka <i>et al.</i> 1999(35)  |
| 9q13 <sup>17</sup> | 46,XX or 46,XY,inv(9)<br>(p11;q13) (=)  |  68,40<br>Mb – 69,51<br>MB (approximate)   | 1,114,652  | <i>See Nanko 1993 in row 9p11</i>          |          |               |   | Nanko 1993(36)                  |
| 9q13 <sup>18</sup> | 46,XY,inv(9)(p11;q13)<br>(=)            |  68,40<br>Mb – 69,51<br>Mb (approximate)   | 1,114,652  | <i>See Demirhan et al 2003 in row 9p11</i> |          |               |   | Demirhan <i>et al.</i> 2003(37) |
| 9q32-<br>q34.1     | 46,XY,del(9)(q32;q34.1)<br>(-)          |  113,49<br>Mb – 134,77<br>MB (approximate) | 21,279,735 | **                                         | Yes (75) | Yes (F<br>+O) | 1 | Park <i>et al.</i> 1991(38)     |

<sup>18</sup> In this study, two male cases are described. All cases are diagnosed according to the DSM-IV. Case entries can be tracked in the chromosome ideogram by identifying the thicker bar in the corresponding color.

|                      |                                 |                                                                                                                                                                                                    |           |                                              |                        |   |   |                                          |
|----------------------|---------------------------------|----------------------------------------------------------------------------------------------------------------------------------------------------------------------------------------------------|-----------|----------------------------------------------|------------------------|---|---|------------------------------------------|
| 9q34.2 <sup>19</sup> | 46,XX,t(9;14)(q34.2;q13)<br>(=) |  134,77<br>Mb – 136,49<br>Mb (Breakpoint<br>within ~250 kb<br>window between<br>BAC RP11-55c4<br>and RP11-206h24) | 1,722,644 | ****                                         | Learning<br>disability | - | 2 | Pickard <i>et al.</i><br>2005(39)        |
| 9q34 <sup>20</sup>   | 46,XX,t(9;14)(q34.2;q13)<br>(=) |  130,99<br>Mb – 131,09<br>Mb (Markers<br>D9S752 and<br>D9S972)                                                    | 100,005   | See Pickard <i>et al.</i> 2005 in row 9q34.2 |                        |   |   | Kamnassaran<br><i>et al.</i><br>2003(40) |

<sup>19</sup> In this study, two female cases are described. Both cases are diagnosed according to the DSM-IV, by using the SADS-L and the PAS-ADD respectively. Case entries can be tracked in the chromosome ideogram by identifying the thicker bar in the corresponding color. See also chromosome 14.

<sup>20</sup> The study of Pickard *et al.* is a follow-up study of the study of Kamnassaran *et al.*, using the same cell lines. Only the most recent follow-up study (Pickard) is shown in the figure. See also chromosome 14.

**Chromosome 10**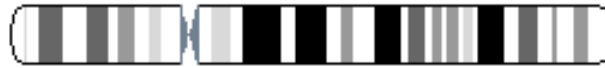

| <i>Band</i>                                           | <i>Karyotype<br/>(type of<br/>mutation)</i> | <i>Cytogenetic<br/>band positions</i> | <i>Size (bp)</i> | <i>Rating<br/>Phenotype</i> | <i>MR (IQ if<br/>mentioned)?</i> | <i>MPA (type)?</i> | <i>Number of<br/>cases</i> | <i>Reference</i> |
|-------------------------------------------------------|---------------------------------------------|---------------------------------------|------------------|-----------------------------|----------------------------------|--------------------|----------------------------|------------------|
| <i>No cytogenetic abnormalities for chromosome 10</i> |                                             |                                       |                  |                             |                                  |                    |                            |                  |

## Chromosome 11

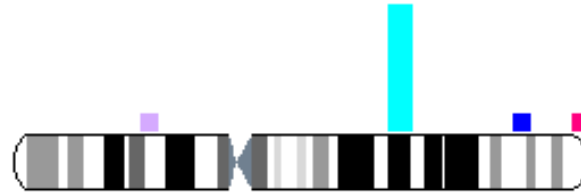

| Band                     | Karyotype (type of mutation)           | Cytogenetic band positions                                                                                                                       | Size (bp) | Rating Phenotype                             | MR (IQ if mentioned)? | MPA (type)? | Number of cases | Reference                        |
|--------------------------|----------------------------------------|--------------------------------------------------------------------------------------------------------------------------------------------------|-----------|----------------------------------------------|-----------------------|-------------|-----------------|----------------------------------|
| 11p13                    | 46,XX,dup(11)(p13;p13) (+)             |  33,30 – 33,30 Mb (Exact boundaries from article)               | 430 (?)   | ****                                         | -                     | -           | 1               | Mizuguchi <i>et al.</i> 2008(23) |
| 11q21 <sup>21</sup>      | 46,XY or 46,XX,t(1;11)(q43;q21) (=)    |  92,10 Mb – 96,40 Mb (approximate)                              | 4,299,999 | See Blackwood <i>et al.</i> 2001 in row 1q43 |                       |             |                 | St Clair <i>et al.</i> 1990(16)  |
| 11q21 <sup>21</sup>      | 46,XY or 46,XX,t(1;11)(q42.2; q21) (=) |  88,55 Mb – 93,92 Mb (Breakpoints between TYR and D11S388)      | 5,366,087 | See Blackwood <i>et al.</i> 2001 in row 1q43 |                       |             |                 | Fletcher <i>et al.</i> 1993(14)  |
| 11q21 <sup>21,22</sup>   | 46,XY or 46,XX,t(1;11)(q42.2; q21) (=) |  84,35 Mb – 89,92 Mb (Breakpoints between D11S1354 and D11S931) | 5,565,697 | See Blackwood <i>et al.</i> 2001 in row 1q43 |                       |             |                 | Millar <i>et al.</i> 1998(41)    |
| 11q14.3 <sup>21,22</sup> | 46,XY or 46,XX,t(1;11)(q42; q14.3) (=) |  87,90 Mb – 92,30 Mb (approximate)                            | 4,399,999 | See Blackwood <i>et al.</i> 2001 in row 1q43 |                       |             |                 | Blackwood <i>et al.</i> 2001(17) |

<sup>21</sup> The studies of Fletcher *et al.*, Millar *et al.*, and Blackwood *et al.* are follow-up studies of the study of St. Clair *et al.* Only the most recent follow-up study (Blackwood) is shown in the figure. See also chromosome 1.

<sup>22</sup> This study describes 7 SZ cases within one family carrying the translocation. The thicker bar indicates the multiple cases involved. See also chromosome 1.

|                       |                                                                                                                                                                                                                                 |                                                                                                                                                                       |           |                                               |     |   |   |                                 |
|-----------------------|---------------------------------------------------------------------------------------------------------------------------------------------------------------------------------------------------------------------------------|-----------------------------------------------------------------------------------------------------------------------------------------------------------------------|-----------|-----------------------------------------------|-----|---|---|---------------------------------|
| 11q23.3 <sup>23</sup> | 46,XX,ins(8;11) (q13; q23.3;q24.2) inv(2)(p12; q32.1)t(2;11)(q21.3; q24.2)der(2)(2qter→2q32.1::2p12→2q21.3::11q24.2 →11qter)der(11) (11pter→11q23.3::2q21.3→2q32.1::2p12→2pter) der(8)(8pter→8q13::11q23.3→11q24.2::8q13→8qter) |  120,23 Mb – 120,26 Mb (Spanning bp of three SNPs with most significant association) | 34,314    | ****                                          | Yes | - | 1 | Pickard <i>et al.</i> 2006(42)  |
| 11q25 <sup>24</sup>   | 46,XX,t(6;11)(q14.2; q25) (=)                                                                                                                                                                                                   |  130,30 Mb – 134,45 Mb (approximate)                                                 | 4,152,383 | See Jeffries <i>et al.</i> 2003 in row 6q14.2 |     |   |   | Holland <i>et al.</i> 1990(28)  |
| 11q25 <sup>24</sup>   | See Holland <i>et al.</i>                                                                                                                                                                                                       |  133,98 Mb – 134,15 Mb (Exact boundaries; within AP001999.4)                         | 164,713   | See Jeffries <i>et al.</i> 2003 in row 6q14.2 |     |   |   | Jeffries <i>et al.</i> 2003(29) |

<sup>23</sup> This study describes a female patient with a very complex chromosomal rearrangement ins (8;11). Follow-up association study of the genes located at the breakpoints of the rearrangement revealed significant association for *GRIK4*, located at 11q23.3. For 8q13 no significant association was found, therefore, this study is only present in the table for 11q23.3 and not for chromosome 8. The basepair boundaries are derived from three SNPs significantly associated with schizophrenia.

<sup>24</sup> The study of Jeffries *et al.* is a fine-mapping study of the breakpoints of the translocation of Holland *et al.* Only the fine-mapping study (Jeffries) is shown in the figure. See also chromosome 6.

## Chromosome 12

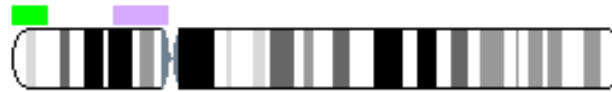

| <i>Band</i>      | <i>Karyotype (type of mutation)</i>  | <i>Cytogenetic band positions</i>                                                  | <i>Size (bp)</i> | <i>Rating Phenotype</i> | <i>MR (IQ if mentioned)?</i> | <i>MPA (type)?</i> | <i>Number of cases</i> | <i>Reference</i>                 |
|------------------|--------------------------------------|------------------------------------------------------------------------------------|------------------|-------------------------|------------------------------|--------------------|------------------------|----------------------------------|
| 12p13.3          | 46,XY,del(12) (p13.3) (-)            | <span style="color: green;">■</span> Pter – 6,2 Mb (Exact boundaries from article) | 6,200,000        | *                       | Yes                          | Yes (F + O)        | 1                      | Velinov <i>et al.</i> 2008(43)   |
| 12pter – 12p12.1 | 46,XY,der(13)t(12;13)(p12.1;p11) (+) | <span style="color: purple;">■</span> 0 – 23,18 Mb (Exact boundaries from article) | 23,100,000       | ****                    | Yes (72)                     | -                  | 1                      | Mizuguchi <i>et al.</i> 2008(23) |



## Chromosome 13

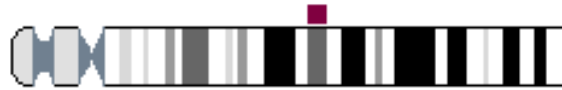

| <i>Band</i> | <i>Karyotype (type of mutation)</i> | <i>Cytogenetic band positions</i>         | <i>Size (bp)</i> | <i>Rating Phenotype</i>                      | <i>MR (IQ if mentioned)?</i> | <i>MPA (type)?</i> | <i>Number of cases</i> | <i>Reference</i>               |
|-------------|-------------------------------------|-------------------------------------------|------------------|----------------------------------------------|------------------------------|--------------------|------------------------|--------------------------------|
| 13q21.31    | 46,XY,t(4;13)(p16.1;q21.31) (=)     | ■ 61,19<br>Mb – 64,59<br>Mb (approximate) | 3,399,552        | See Itokawa <i>et al.</i> 2004 in row 4p16.1 |                              |                    |                        | Itokawa <i>et al.</i> 2004(19) |

## Chromosome 14

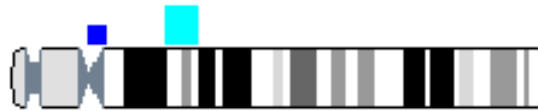

| Band                   | Karyotype (type of mutation)  | Cytogenetic band positions                                                                                                                                                     | Size (bp)  | Rating Phenotype                             | MR (IQ if mentioned)? | MPA (type)? | Number of cases | Reference                          |
|------------------------|-------------------------------|--------------------------------------------------------------------------------------------------------------------------------------------------------------------------------|------------|----------------------------------------------|-----------------------|-------------|-----------------|------------------------------------|
| 14q10 <sup>25</sup>    | 45,XY,der(14;21)(q10;q10) (+) |  Qter Mb – 15,60 Mb (Centromere)                                                              | 15,600,001 | **                                           | -                     | -           | 1               | Toyota <i>et al.</i> 2001(32)      |
| 14q13 <sup>26,27</sup> | 46,XX,t(9;14)(q34.2;q13) (=)  |  32,40 Mb – 36,90 Mb (Breakpoint within ~250 kb window between BAC RP11-55c4 and RP11-206h24) | 4,499,660  | See Pickard <i>et al.</i> 2005 in row 9q34.2 |                       |             |                 | Pickard <i>et al.</i> 2005(39)     |
| 14q13 <sup>27</sup>    | 46,XX,t(9;14)(q34.2;q13) (=)  |  32,85 Mb – 33,53 Mb (Markers D14S730 and D14S70)                                             | 683,130    | See Pickard <i>et al.</i> 2005 in row 9q34.2 |                       |             |                 | Kamnassaran <i>et al.</i> 2003(40) |

<sup>25</sup> In this study, two female cases and two male cases are described with 46,XY and 46,XX,inv(9)(p12;q13). Another male patient showed 45,XY,der(14;21)(q10;q10). All cases are diagnosed according to the DSM-IV. Case entries can be tracked in the chromosome ideogram by identifying the bar in the corresponding color. The first four cases can be found in the tables for the corresponding chromosomes.

<sup>26</sup> In this study, two female cases are described. Both cases are diagnosed according to the DSM-IV, by using the SADS-L and the PAS-ADD respectively. Case entries can be tracked in the chromosome ideogram by identifying the thicker bar in the corresponding color. See also chromosome 9.

<sup>27</sup> The study of Pickard *et al.* is a follow-up study of the study of Kamnassaran *et al.*, using the same cell lines. Only the most recent follow-up study (Pickard) is shown in the figure. See also chromosome 9.

## Chromosome 15

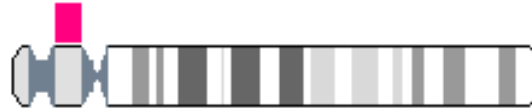

| <i>Band</i>         | <i>Karyotype (type of mutation)</i> | <i>Cytogenetic band positions</i>                                                                                  | <i>Size (bp)</i> | <i>Rating Phenotype</i> | <i>MR (IQ if mentioned)?</i> | <i>MPA (type)?</i> | <i>Number of cases</i> | <i>Reference</i>               |
|---------------------|-------------------------------------|--------------------------------------------------------------------------------------------------------------------|------------------|-------------------------|------------------------------|--------------------|------------------------|--------------------------------|
| 15p11 <sup>28</sup> | 46,XY,t(Y;15)(q12;p11) (=)          |  7,90 Mb – 17,00 MB (approximate) | 9,099,999        | *                       | -                            | Yes (F) (one case) | 2                      | Alitalo <i>et al.</i> 1988(44) |

<sup>28</sup> In this study, two male cases are described. Both cases are diagnosed with paranoid schizophrenia. Case entries can be tracked in the chromosome ideogram by identifying the thicker bar in the corresponding color. See also the Y chromosome.

## Chromosome 16

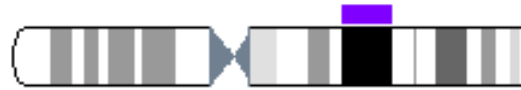

| <i>Band</i> | <i>Karyotype (type of mutation)</i> | <i>Cytogenetic band positions</i>                                                                                   | <i>Size (bp)</i> | <i>Rating Phenotype</i> | <i>MR (IQ if mentioned)?</i>              | <i>MPA (type)?</i> | <i>Number of cases</i> | <i>Reference</i>             |
|-------------|-------------------------------------|---------------------------------------------------------------------------------------------------------------------|------------------|-------------------------|-------------------------------------------|--------------------|------------------------|------------------------------|
| 16q21       | 46,XY,t(1;16)(p31.2;q21) (=)        |  56,70 Mb – 63,90 Mb (approximate) | 7,199,594        |                         | See Millar <i>et al.</i> 2005 in row 1q21 |                    |                        | Millar <i>et al.</i> 2005(9) |

## Chromosome 17

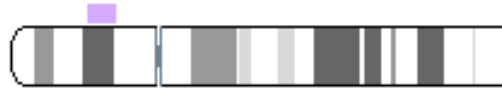

| <i>Band</i> | <i>Karyotype (type of mutation)</i> | <i>Cytogenetic band positions</i>                | <i>Size (bp)</i> | <i>Rating Phenotype</i> | <i>MR (IQ if mentioned)?</i> | <i>MPA (type)?</i> | <i>Number of cases</i> | <i>Reference</i>                 |
|-------------|-------------------------------------|--------------------------------------------------|------------------|-------------------------|------------------------------|--------------------|------------------------|----------------------------------|
| 17p12       | 46,XY,del(17)(p12;p12)<br>(-)       | 14,06 – 15,37 Mb (Exact boundaries from article) | 1,300,000        | ****                    | -                            | -                  | 1                      | Mizuguchi <i>et al.</i> 2008(23) |

## Chromosome 18

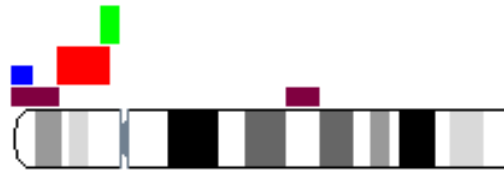

| Band                     | Karyotype (type of mutation)                  | Cytogenetic band positions                                                                                                                 | Size (bp) | Rating Phenotype                               | MR (IQ if mentioned)? | MPA (type)?            | Number of cases | Reference                                 |
|--------------------------|-----------------------------------------------|--------------------------------------------------------------------------------------------------------------------------------------------|-----------|------------------------------------------------|-----------------------|------------------------|-----------------|-------------------------------------------|
| 18pter                   | 46,XY,del(18)(pter) (-)                       |  Pter (Approximate. Cryptic subtelomeric deletion of 18p) | 2,900,000 | **                                             | Yes                   | Yes (F + O)            | 1               | Babovic-Vuksanovic <i>et al.</i> 2004(45) |
| 18p11.3                  | 46,XY,inv(18)(p11.3;q21.1) (=)                |  Pter – 7,20 Mb (approximate)                             | 7,200,000 | ****                                           | -                     | -                      | 1               | Mors <i>et al.</i> 1997(46)               |
| 18p11.2 <sup>29</sup>    | 46, XY and 46, XX, t(2;18) (p11.2;p11.2) (=)  |  7,20 Mb – 15,40 Mb (approximate)                         | 8,199,999 | See Maziade <i>et al.</i> 1993 in row 2p11.2   |                       |                        |                 | Maziade <i>et al.</i> 1993(18)            |
| 18p11.1 <sup>30,31</sup> | 46,XX or XY,t(18;21)(p11.1;p11.1) (=) and (-) |  15,40 – 16,10 Mb (approximate)                           | 699,999   | See Meerabux <i>et al.</i> 2009 in row 18p11.1 |                       |                        |                 | Smith <i>et al.</i> 1996(47)              |
| 18p11.1 <sup>31</sup>    | 46,XX or XY,t(18;21)(p11.1;p11.1) (=) and (-) |  14,85 – 15,01 Mb (BAC RP11-527H14)                       | 157,569   | ****                                           | Yes (only daughter)   | Yes (F; only daughter) | 2               | Meerabux <i>et al.</i> 2009(48)           |
| 18q21.1                  | 46,XY,inv(18)(p11.3;q21.1) (=)                |  41,80 Mb – 48,50 Mb (approximate)                      | 6,699,999 | See Mors <i>et al.</i> 1977 in row 18p11.3     |                       |                        |                 | Mors <i>et al.</i> 1997(46)               |

<sup>29</sup> In this study, one female case and one male case are described. Both cases have been diagnosed according to the DSM-III. Case entries can be tracked in the chromosome ideogram by identifying the thicker bar in the corresponding color. See also chromosome 2.

<sup>30</sup> This study describes two male cases and two female cases. The oldest son and daughter are diagnosed according to DSM-III-R criteria. The youngest son displayed characteristics, but not sufficient for a formal diagnosis. The mother had a diagnosis of psychosis not otherwise specified. Only the oldest son and daughter with schizophrenia are mentioned in the table. The oldest son has a balanced reciprocal translocation. The daughter inherited only the translocated 18. She is the only one with mild mental retardation and dysmorphic facial features. Case entries can be tracked in the chromosome ideogram by identifying the thicker bar in the corresponding color. See also chromosome 21.

<sup>31</sup> The study of Meerabux *et al.* is a follow-up study of the study of Smith *et al.* Only the most recent follow-up study (Meerabux) is shown in the figure. See also chromosome 21.

**Chromosome 19**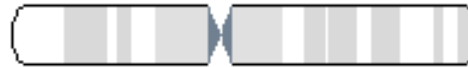

| <i>Band</i>                                           | <i>Karyotype (type of mutation)</i> | <i>Cytogenetic band positions</i> | <i>Size (bp)</i> | <i>Rating Phenotype</i> | <i>MR (IQ if mentioned)?</i> | <i>MPA (type)?</i> | <i>Number of cases</i> | <i>Reference</i> |
|-------------------------------------------------------|-------------------------------------|-----------------------------------|------------------|-------------------------|------------------------------|--------------------|------------------------|------------------|
| <i>No cytogenetic abnormalities for chromosome 19</i> |                                     |                                   |                  |                         |                              |                    |                        |                  |

**Chromosome 20**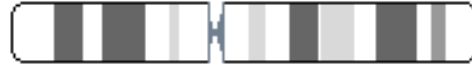

| <i>Band</i>                                           | <i>Karyotype<br/>(type of<br/>mutation)</i> | <i>Cytogenetic<br/>band positions</i> | <i>Size (bp)</i> | <i>Rating<br/>Phenotype</i> | <i>MR (IQ if<br/>mentioned)?</i> | <i>MPA (type)?</i> | <i>Number of<br/>cases</i> | <i>Reference</i> |
|-------------------------------------------------------|---------------------------------------------|---------------------------------------|------------------|-----------------------------|----------------------------------|--------------------|----------------------------|------------------|
| <i>No cytogenetic abnormalities for chromosome 20</i> |                                             |                                       |                  |                             |                                  |                    |                            |                  |



## Chromosome 21

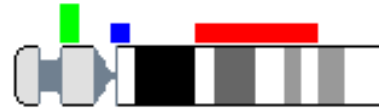

| Band                  | Karyotype (type of mutation)                  | Cytogenetic band positions                                                                                           | Size (bp)  | Rating Phenotype                               | MR (IQ if mentioned)? | MPA (type)? | Number of cases | Reference                       |
|-----------------------|-----------------------------------------------|----------------------------------------------------------------------------------------------------------------------|------------|------------------------------------------------|-----------------------|-------------|-----------------|---------------------------------|
| 21p11.1 <sup>32</sup> | 46,XX or XY,t(18;21)(p11.1;p11.1) (=) and (-) |  10,00 – 12,30 Mb (approximate)     | 2,299,999  | See Meerabux <i>et al.</i> 2009 in row 18p11.1 |                       |             |                 | Smith <i>et al.</i> 1996(47)    |
| 21p11.1 <sup>33</sup> | 46,XX or XY,t(18;21)(p11.1;p11.1) (=) and (-) |  10,79 – 10,79 Mb (BAC RP11-2503J9) | 161        | See Meerabux <i>et al.</i> 2009 in row 18p11.1 |                       |             |                 | Meerabux <i>et al.</i> 2009(48) |
| 21q10 <sup>34</sup>   | 45,XY,der(14;21)(q10;q10) (+)                 |  Qter – 13,20 Mb (Centromere)       | 13,200,001 | See Toyota <i>et al.</i> 2001 in row 14q10     |                       |             |                 | Toyota <i>et al.</i> 2001(32)   |
| 21q21.2-q22.1         | 46,XY,del(21)(q21.2;q22.1) (-)                |  15,30 – 38,60 Mb (approximate)     | 23,299,999 | ****                                           | Yes (58)              | Yes (F + O) | 1               | Murtagh <i>et al.</i> 2005(49)  |

<sup>32</sup> This study describes two male cases and two female cases. The mother, son and oldest daughter are diagnosed according to DSM-III-R criteria. The youngest daughter displayed characteristics, but not sufficient for a formal diagnosis. The mother, son and youngest daughter have a balanced reciprocal translocation. The oldest daughter inherited only the translocated 18. She is the only one with mild mental retardation and dysmorphic facial features. Case entries can be tracked in the chromosome ideogram by identifying the thicker bar in the corresponding color. See also chromosome 18.

<sup>33</sup> The study of Meerabux *et al.* is a follow-up study of the study of Smith *et al.* Only the most recent follow-up study (Meerabux) is shown in the figure. See also chromosome 18.

<sup>34</sup> In this study, two female cases and two male cases are described with 46,XY and 46,XX,inv(9)(p12;q13). Another male patient showed 45,XY,der(14;21)(q10;q10). All cases are diagnosed according to the DSM-IV. Case entries can be tracked in the chromosome ideogram by identifying the bar in the corresponding color. The first four cases can be found in the tables for the corresponding chromosomes.

## Chromosome 22

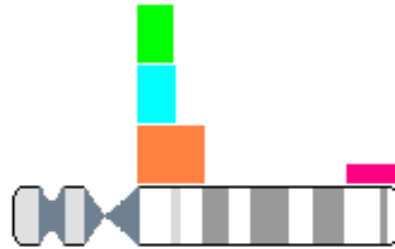

| Band                  | Karyotype (type of mutation)                                     | Cytogenetic band positions                                                                                                                                    | Size (bp)  | Rating Phenotype | MR (IQ if mentioned)? | MPA (type)? | Number of cases                  | Reference                          |
|-----------------------|------------------------------------------------------------------|---------------------------------------------------------------------------------------------------------------------------------------------------------------|------------|------------------|-----------------------|-------------|----------------------------------|------------------------------------|
| 22q11.2 <sup>35</sup> | 16 22q11.2 deletions in 2133 patients (0.75%, 95% CI: 0.5%-1.2%) |  16,31 Mb – 24,32 Mb (approximate)                                           | 8,005,928  | -                | -                     | -           | Review and prevalence estimation | Hoogendoorn <i>et al.</i> 2008(50) |
| 22q11.2 <sup>36</sup> | Fine-mapping of deletion in 22 patients with SZ                  |  17,16 Mb – 20,14 Mb (Proximal between USP18 & PRODH; distal D22S936 & HIC2) | 3,100,000  | **               | -                     | -           | 22                               | Weksberg <i>et al.</i> 2007(51)    |
| 22q11.2 <sup>37</sup> | 87% of the 22q11 deletions in SZ cases                           |  16,97 Mb – 19,78 Mb (Between markers D22S427 and D22S801)                   | 32,811,378 | -                | -                     | -           | Overview study                   | Karayiorgou <i>et al.</i> 2004(52) |
| 22q13.3-qter          | 46,XX,dup(22)(q13.3-qter) (+)                                    |  42,63 Mb – 49,59 Mb (Approximate. Terminal duplication of 5.4 Mb)         | 6,436,619  | ***              | Yes (73)              | Yes (F + O) | 1                                | Failla <i>et al.</i> 2007(53)      |

<sup>35</sup> This study is included as a review and update for the prevalence estimation of the 22q11.2 deletion in schizophrenia patients. It is an illustration for all published 22q11 studies on schizophrenia. The colored bar is thick to illustrate the many cases.

<sup>36</sup> In this study, 22 patients are fine-mapped on the 22q11.2 region, satisfying the DSM-IV criteria for schizophrenia. The colored bar is thick to illustrate the many cases.

<sup>37</sup> This study is included as an overview-study for the different forms of the 22q11.2 deletion in schizophrenia patients. Used is the large deletion region, present in the overwhelming majority (87%) of the schizophrenia cases with this deletion. The colored bar is thick to illustrate the many cases.

## Chromosome X

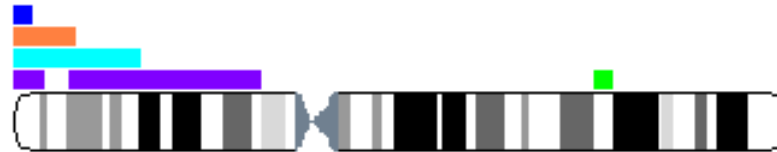

| Band                                             | Karyotype (type of mutation)                                   | Cytogenetic band positions                                                                                                                                                                                                                                     | Size (bp)               | Rating Phenotype | MR (IQ if mentioned)? | MPA (type)? | Number of cases | Reference                       |
|--------------------------------------------------|----------------------------------------------------------------|----------------------------------------------------------------------------------------------------------------------------------------------------------------------------------------------------------------------------------------------------------------|-------------------------|------------------|-----------------------|-------------|-----------------|---------------------------------|
| Xp22                                             | 46,Y,der(X)t(X;Y)(p22;q11)mat (=)                              |  Pter Mb – 24,71 Mb (approximate)                                                                                                                                             | 24,714,276              | *                | No (90)               | Yes (O)     | 1               | Yamada <i>et al.</i> 1982(54)   |
| Xp22.2-p22.3 <sup>38</sup>                       | 46,XX,del(X)(p22.2;p22.3) (-)                                  |  3,00 Mb – 10,15 Mb (Markers DXS1233 and DXS7108)                                                                                                                             | 7,153,532               | ***              | Learning disabilities | Yes (O)     | 1               | Milunsky <i>et al.</i> 1999(55) |
| Xp22.2-p22.33 and<br>Xp11.23-p22.2 <sup>38</sup> | 46,XX,del(X)(p22.2;p22.33) (-) and<br>dup(X)(p11.23;p22.2) (+) |  2,63 Mb – 5,42 Mb (Markers AFMB290XG5 and DXS1060)<br>AND  9,30 Mb – 49,50 Mb (approximate) | 2,788,457<br>40,199,999 | ***              | -                     | Yes (F + O) | 1               | Milunsky <i>et al.</i> 1999(55) |
| Xp22.33                                          | 46,X,t(XY)(p22.33;p11.2) (=)                                   |  1,48 Mb – 1,72 Mb (Genes ASMTL and ASMT)                                                                                                                                     | 239,942                 | **               | Yes (72)              | Yes (O)     | 1               | Ross <i>et al.</i> 2001(56)     |
| Xq24                                             | 46,X, del (Xq24) (-)                                           |  116,30 Mb – 120,60 Mb (approximate)                                                                                                                                        | 4,299,999               | **               | -                     | Yes (F)     | 1               | Kumra <i>et al.</i> 1998(57)    |

<sup>38</sup> In this study, two cases are described. One case with del(X)(p22.2;p22.3) and another case with dup(X)(p11.23;p22.2) and del(X)(p22.2;p22.33). Both cases met DSM-IV criteria for schizophrenia. Because basepair limits are not the same for both individuals, case entries have different colors in the chromosome ideogram.

## Chromosome Y

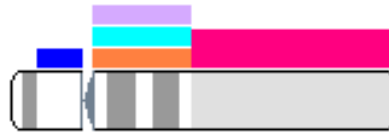

| Band               | Karyotype (type of mutation)      | Cytogenetic band positions                                                                                                                                                                 | Size (bp)  | Rating Phenotype                            | MR (IQ if mentioned)? | MPA (type)? | Number of cases | Reference                        |
|--------------------|-----------------------------------|--------------------------------------------------------------------------------------------------------------------------------------------------------------------------------------------|------------|---------------------------------------------|-----------------------|-------------|-----------------|----------------------------------|
| Yp11.2             | 46,X,t(XY)(p22.33;p11.2) (=)      |  3,30 Mb – 11,20 Mb (approximate)                                                                         | 7,899,999  | See Ross <i>et al.</i> 2001 in row Xp22.33  |                       |             |                 | Ross <i>et al.</i> 2001(56)      |
| Yq11               | 46,X,dic(Y)(q11) (+)              |  11,51 Mb – 27,13 MB (Approximate. Breakpoint q11, resulting in 2 copies short arm and proximal long arm) | 15,619,266 | ***                                         | Yes (60)              | Yes (O)     | 1               | Nanko <i>et al.</i> 1993(58)     |
| Yq11               | 46,Y,der(X)t(X;Y)(p22;q11)mat (=) |  11,51 Mb – 27,13 Mb (approximate)                                                                        | 15,619,266 | See Yamada <i>et al.</i> 1982 in row Xp22   |                       |             |                 | Yamada <i>et al.</i> 1982(54)    |
| Yq11.2             | 46,X,idic(Y)(q11.2)               |  12,50 – 27,20 Mb (approximate)                                                                           | 14,700,000 | ****                                        | -                     | -           | 1               | Mizuguchi <i>et al.</i> 2008(23) |
| Yq12 <sup>39</sup> | 46,XY,t(Y;15)(q12;p11) (=)        |  27,13 Mb – 57,77 MB (approximate)                                                                        | 30,639,484 | See Alitalo <i>et al.</i> 1988 in row 15p11 |                       |             |                 | Alitalo <i>et al.</i> 1988(44)   |

<sup>39</sup> In this study, two male cases are described. Both cases are diagnosed with paranoid schizophrenia. Case entries can be tracked in the chromosome ideogram by identifying the thicker bar in the corresponding color. See also chromosome 15.

## References

1. Bassett A (1992): Chromosomal aberrations and schizophrenia. *Br J Psychiatry* 16: 323-334.
2. Bassett A (2000): Chromosomal abnormalities and schizophrenia. *Am J Med Genet (Semin Med Genet)* 97: 45-51.
3. Craddock N, Owen MJ (1994): Chromosomal aberrations and bipolar affective disorder. *Br J Psychiatry* 164: 507-512.
4. DeLisi L, Reiss A, White B, Gershon E (1988): Cytogenetic studies of males with schizophrenia. Screening for the fragile X chromosome and other chromosomal abnormalities. *Schizophr Res* 1: 277-281.
5. MacIntyre D, Blackwood D, Porteous D, Pickard B, Muir W (2003): Chromosomal abnormalities and mental illness. *Mol Psychiatry* 8: 275-287.
6. Hoogendoorn M, Vorstman J, Jalali G, Selten J, Sinke R, Emanuel B, *et al.* (2008): Prevalence of 22q11.2 deletions in 311 Dutch patients with schizophrenia. *Schizophr Res* 98: 84-88.
7. Karayiorgou M, Gogos J (2004): The molecular genetics of the 22q11-associated schizophrenia. *Mol Brain Res* 132: 95-104.
8. Weksberg R, Stachon A, Squire J, Moldovan L, Bayani J, Meyn S, *et al.* (2007): Molecular characterization of deletion breakpoints in adults with 22q11 deletion syndrome. *Hum Genet* 120: 837-845.
9. Millar J, Pickard B, Mackie S, James R, Christie S, Buchanan S, *et al.* (2005): DISC1 and PDE4B are interacting genetic factors in schizophrenia that regulate cAMP signaling. *Science* 310: 1187-1191.
10. Idol J, Addington A, Long R, Rapoport J, Green E (2008): Sequencing and analyzing the t(1;7) reciprocal translocation breakpoints. Associated with a case of childhood-onset schizophrenia/autistic disorder. *J Autism Dev Disord* 38: 668-677.
11. Gordon C, Krasnewich D, White B, Lenane M, Rapoport J (1994): Brief report: translocation involving chromosomes 1 and 7 in a boy with childhood-onset schizophrenia. *J Autism Dev Disord* 24: 537-545.

12. Cordeiro Q, Zung S, Campanha E, Vallada H (2007): Chromosomal translocation t(1;4)(p21;p14) indicating possible susceptibility loci for schizophreniform disorder and mental retardation. *J Neuropsychiatry Clin Neurosci* 19: 339.
13. Price W, Brunton M, Buckton K, Jacobs P (1976): Chromosome survey of new patients admitted to the four maximum security hospitals of the United Kingdom. *Clin Genet* 9: 389-398.
14. Fletcher J, Evans K, Baillie D, Byrd P, Hanratty D, Leach S, *et al.* (1993): Schizophrenia-associated chromosome 11q21 translocation: identification of flanking markers and development of chromosome 11q fragment hybrids as cloning and mapping resources. *Am J Hum Genet* 52: 478-490.
15. Millar J, Wilson-Annan J, Anderson S, Christie S, Taylor M, Semple C, *et al.* (2000): Disruption of two novel genes by a translocation cosegregating with schizophrenia. *Hum Mol Genet* 9: 1415-1423.
16. St Clair D, Blackwood D, Muir W, Carothers A, Walker M, Spowart G, *et al.* (1990): Association within a family of a balanced autosomal translocation with major mental illness. *Lancet* 336: 13-16.
17. Blackwood D, Fordyce A, Walker M, St Clair D, Porteous D, Muir W (2001): Schizophrenia and affective disorders - cosegregation with a translocation at chromosome 1q42 that directly disrupts brain-expressed genes: clinical and P300 findings in a family. *Am J Hum Genet* 69: 428-433.
18. Maziade M, Debraekeleer M, Genest P, Cliche D, Fournier J, Garneau Y, *et al.* (1993): A balanced 2:18 translocation and familial schizophrenia: falling short of an association. *Arch Gen Psychiatry* 50: 73-75.
19. Itokawa M, Kasuga T, Yoshikawa T, Matsushita M (2004): Identification of a male schizophrenic patient carrying a de novo balanced translocation, t(4;13)(p16.1;q21.31). *Psychiatry Clin Neurosci* 58: 333-337.
20. Palmour R, Miller S, Fielding A, Vekemans M, Ervin F (1994): A contribution to the differential diagnosis of the "Group of Schizophrenias": Structural abnormality of chromosome 4. *Psychiatry Neurosci* 19: 270-277.

21. Mensah A, De Luca V, Stachowiak B, Noor A, Windpassinger C, Lam S, *et al.* (2007): Molecular analysis of a chromosome 4 inversion segregating in a large schizophrenia kindred from Hong Kong. *Schizophr Res* 95: 228-235.
22. Malaspina D, Warburton D, Amador X, Harris M, Kaufmann C (1992): Association of schizophrenia and partial trisomy of chromosome 5p. *Schizophr Res* 7: 191-196.
23. Mizuguchi T, Hashimoto R, Itokawa M, Sano A, Shimokawa O, Yoshimura Y, *et al.* (2008): Microarray comparative genomic hybridization analysis of 59 patients with schizophrenia. *J Hum Genet* 53: 914-919.
24. Bassett A, Jones B, McGillivray B, Pantzar J (1988): Partial trisomy chromosome 5 cosegregating with schizophrenia. *Lancet* 1: 799-801.
25. Bennett R, Karayiorgou M, Sobin C, Norwood T, Kay M (1997): Identification of an interstitial deletion in an adult female with schizophrenia, mental retardation, and dysmorphic features: further support for a putative schizophrenia-susceptibility locus at 5q21-23.1. *Am J Hum Genet* 61: 1450-1454.
26. Seal J, Gornick M, Gogtay N, Shaw P, Greenstein D, Coffey M, *et al.* (2006): Segmental uniparental isodisomy on 5q32-qter in a patient with childhood-onset schizophrenia. *J Med Genet* 43: 887-892.
27. Caluseriu O, Mirza G, Ragoussis J, Chow E, MacCrimmon D, Bassett A (2006): Schizophrenia in an adult with 6p25 deletion syndrome. *Am J Med Genet Part A* 140: 1208-1213.
28. Holland T, Gosden C (1990): A balanced chromosomal translocation partially co-segregating with psychotic illness in a family. *Psychiatr Res* 32: 1-8.
29. Jeffries A, Mungall A, Dawson E, Halls K, Langford C, Murray R, *et al.* (2003): Beta-1,3-Glucuronyltransferase-1 gene implicated as a candidate for a schizophrenia-like psychosis through molecular analysis of a balanced translocation. *Mol Psychiatry* 8: 654-663.

30. Knight H, Pickard B, Maclean A, Malloy M, Soares D, McRae A, *et al.* (2009): A cytogenetic abnormality and rare coding variants identify ABCA13 as a candidate gene in schizophrenia, bipolar disorder, and depression. *Am J Hum Genet* 85: 833-846.
31. Yan W, Guan X-Y, Green E, Nicolson R, Yap T, Zhang J, *et al.* (2000): Childhood-onset schizophrenia/autistic disorder and t(1;7) reciprocal translocation: Identification of a BAC Contig spanning the translocation breakpoint at 7q21. *Am J Med Genet* 96: 749-753.
32. Toyota T, Shimizu H, Yamada K, Yoshitsugu K, Meerabux J, Hattori E, *et al.* (2001): Karyotype analysis of 161 unrelated schizophrenics: no increased rates of X chromosome mosaicism or inv(9), using ethnically matched and aged-stratified controls. *Schizophr Res* 52: 171-179.
33. Kunugi H, Lee K, Nanko S (1999): Cytogenetic findings in 250 schizophrenics: evidence confirming an excess of the X chromosome aneuploidies and pericentric inversion of chromosome 9. *Schizophr Res* 40: 43-47.
34. Lee K, Kunugi H, Nanko S (1998): Familial schizophrenia with pericentric inversion of chromosome 9: a case report. *Schizophr Res* 32: 123-126.
35. Miyaoka T, Seno H, Itoga M, Ishino H (1999): A case of small cerebral cyst and pericentric inversion of chromosome 9 that developed schizophrenia-like psychosis. *Psychiatry Clin Neurosci* 53: 599-602.
36. Nanko S, Kunugi H, Sasaki T, Fukuda R, Kawate T, Kazamatsuri H (1993): Pericentric region of chromosome 9 is a possible candidate region for linkage study of schizophrenia. *Biol Psychiatry* 33: 655-658.
37. Demirhan O, Tastemir D (2003): Chromosome aberrations in a schizophrenia population. *Schizophr Res* 65: 1-7.
38. Park J, Moeschler J, Berg S, Wuster-Hill D (1991): Schizophrenia and mental retardation in an adult male with a de novo interstitial deletion 9(q32q34.1). *J Med Genet* 28: 282-283.
39. Pickard B, Malloy M, Porteous D, Blackwood D, Muir W (2005): Disruption of a brain transcription factor, NPAS3, is associated with schizophrenia and learning disability. *Am J Med Genet Part B* 136: 26-32.



40. Kamnasaran D, Muir W, Ferguson-Smith M, Cox D (2003): Disruption of the neuronal PAS3 gene in a family affected with schizophrenia. *J Med Genet* 40: 325-332.
41. Millar J, Brown J, Maule J, Shibasaki Y, Christie S, Lawson D, *et al.* (1998): A long-range restriction map across 3 Mb of the chromosome 11 breakpoint region of a translocation linked to schizophrenia: localization of the breakpoint and the search for neighbouring genes. *Psychiatr Genet* 8: 175-181.
42. Pickard B, Malloy M, Christoforou A, Thomson P, Evans K (2006): Cytogenetic and genetic evidence supports a role for the kainite-type glutamate receptor gene, GRIK4, in schizophrenia and bipolar disorder. *Mol Psychiatry* 11: 847-857.
43. Velinov M, Beldia G, Gu H, Tsiouris J, Jenkins E, Brown W (2008): Psychotic manifestations in a patient with mental retardation and a 6.2 megabase deletion at the distal short arm of chromosome 12. *CNS Spectr* 13: 515-519.
44. Alitalo T, Tiihonen J, Hakola P, de la Chapelle A (1988): Molecular characterization of a Y;15 translocation segregating in a family. *Hum Genet* 79: 29-35.
45. Babovic-Vuksanovic D, Jenkins S, Ensenauer R, Newman D, Jalal S (2004): Subtelomeric deletion of 18p in an adult with paranoid schizophrenia and mental retardation. *Am J Med Genet Part A* 124: 318-322.
46. Mors O, Ewald H, Blackwood D, Muir W (1997): Cytogenetic abnormalities on chromosome 18 associated with bipolar affective disorder or schizophrenia. *Br J Psychiatry* 170: 278-280.
47. Smith A, Peterson P, Wieland J, Moriarty T, DeLisi L (1996): Chromosome 18 translocation (18;21)(p11.1;p11.1) associated with psychosis in one family. *Am J Med Genet Part B* 67B: 560-563.
48. Meerabux J, Ohba H, Iwayama Y, Maekawa M, Detera-Wadleigh S, DeLisi L, *et al.* (2009): Analysis of a t(18;21)(p11.1; p11.1) translocation in a family with schizophrenia. *J Hum Genet* 54: 386-391.

49. Murtagh A, McTigue O, Ramsay L (2005): Interstitial deletion of chromosome 21q and schizophrenia susceptibility. *Schizophr Res* 78: 353-356.
50. Hoogendoorn M, Vorstman J, Jalali G, Selten J, Sinke R, Emanuel B, *et al.* (2008): Prevalence of 22q11.2 deletions in 311 Dutch patients with schizophrenia. *Schizophr Res* 98: 84-88.
51. Weksberg R, Stachon A, Squire J, Moldovan L, Bayani J, Meyn S, *et al.* (2007): Molecular characterization of deletion breakpoints in adults with 22q11 deletion syndrome. *Hum Genet* 120: 837-845.
52. Karayiorgou M, Gogos J (2004): The molecular genetics of the 22q11-associated schizophrenia. *Mol Brain Res* 132: 95-104.
53. Failla P, Romano C, Alberti A, Vasta A, Buono S, Castiglia L, *et al.* (2007): Schizophrenia in a patient with subtelomeric duplication of chromosome 22q. *Clin Genet* 71: 599-601.
54. Yamada K, Nanko S, Hattori S, Isurugi K (1982): Cytogenetic studies in a Y-to-X translocation observed in three members of one family, with evidence of infertility in male carriers. *Hum Genet* 60: 85-90.
55. Milunsky J, Huang X-L, Wyandt H, Milunsky A (1999): Schizophrenia susceptibility gene locus at Xp22.3. *Clin Genet* 55: 455-460.
56. Ross N, Yang J, Sargent C, Boucher C, Nanko S, Wadekar R, *et al.* (2001): Triplication of several PAR1 genes and part of the Homo Sapiens specific Yp11.2/Xq21.3 region of homology in a 46,X,t(X;Y)(p22.33;p11.2) male with schizophrenia. *J Med Genet* 38: 710-719.
57. Kumra S, Wiggs E, Krosnewich D, Meck J, Smith A, Bedwell J, *et al.* (1998): Brief report: association of sex chromosome anomalies with childhood-onset psychotic disorders. *J Am Acad Child Adolesc Psychiatry* 37: 292-296.
58. Nanko S, Konishi T, Satoh S, Ikeda H (1993): A case of schizophrenia with a dicentric Y chromosome. *Jpn J Hum Genet* 38: 229-232.

**Figure S1.** Copy Number Variations (CNVs) in 834 Dutch schizophrenia cases compared with CNVs from literature.

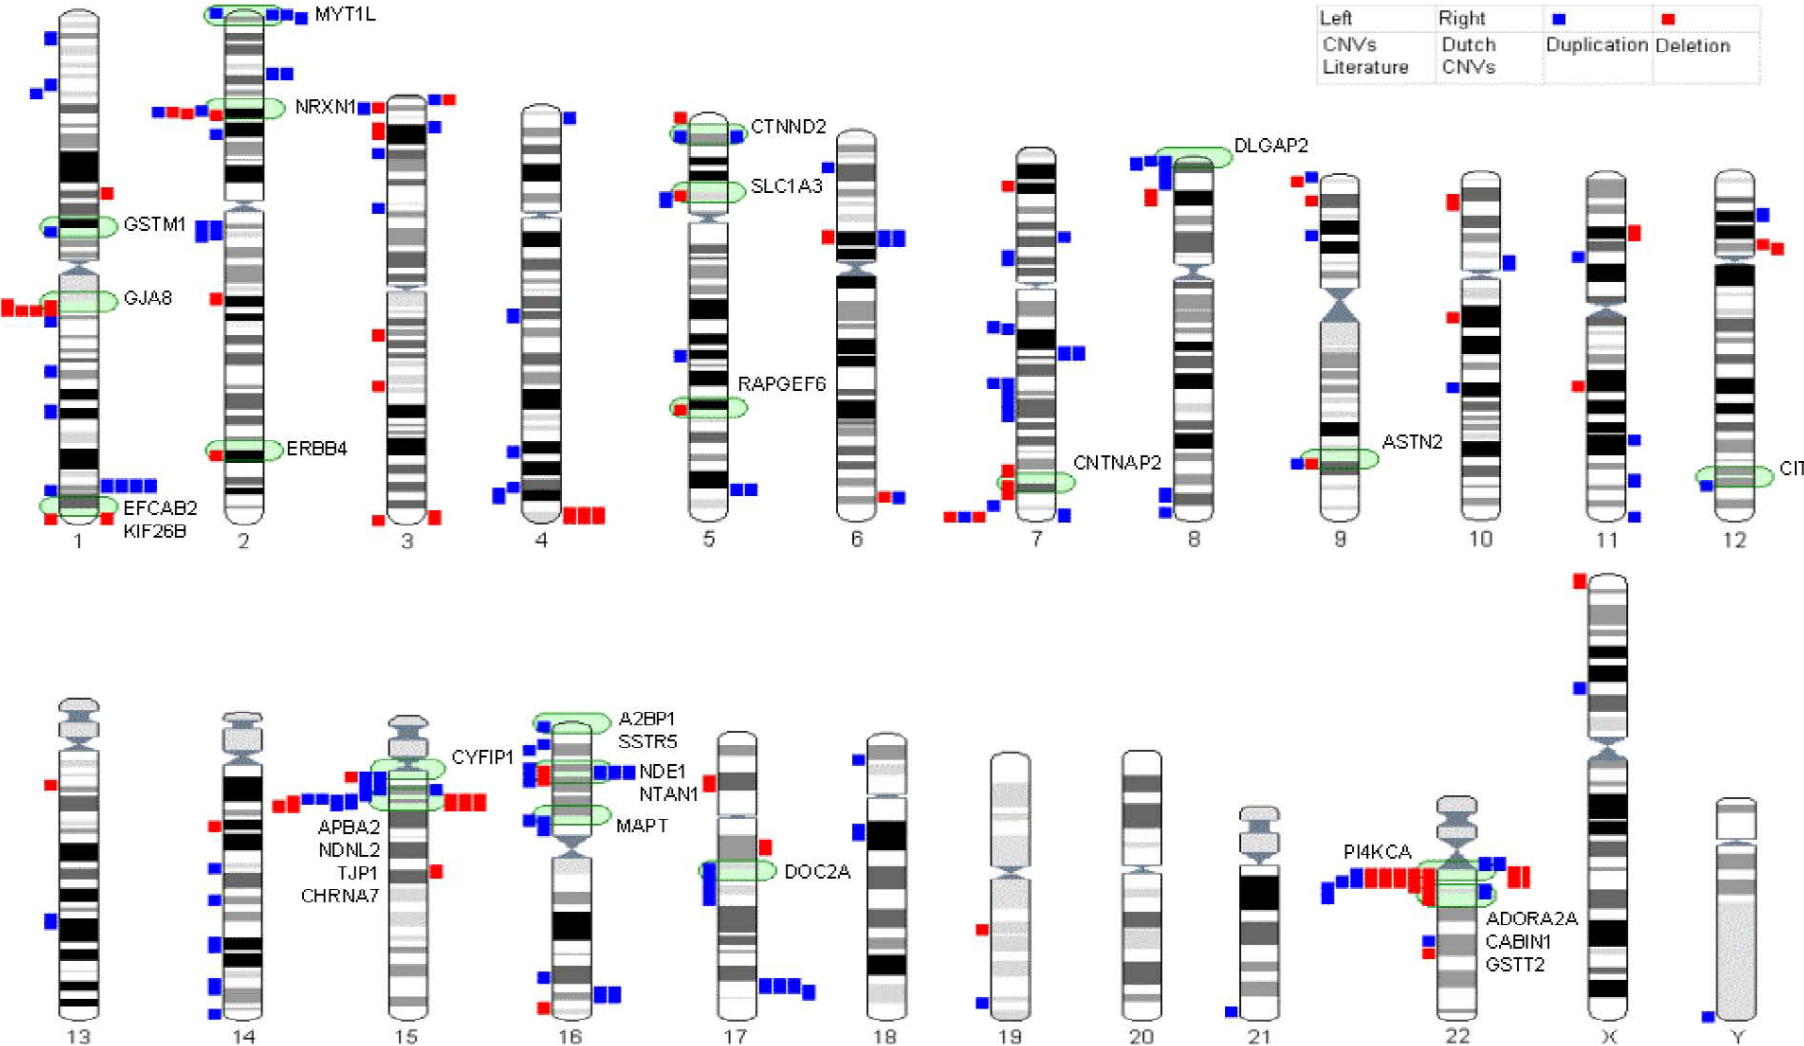

Figure S2. Cytogenetic aberrations in schizophrenia from literature.

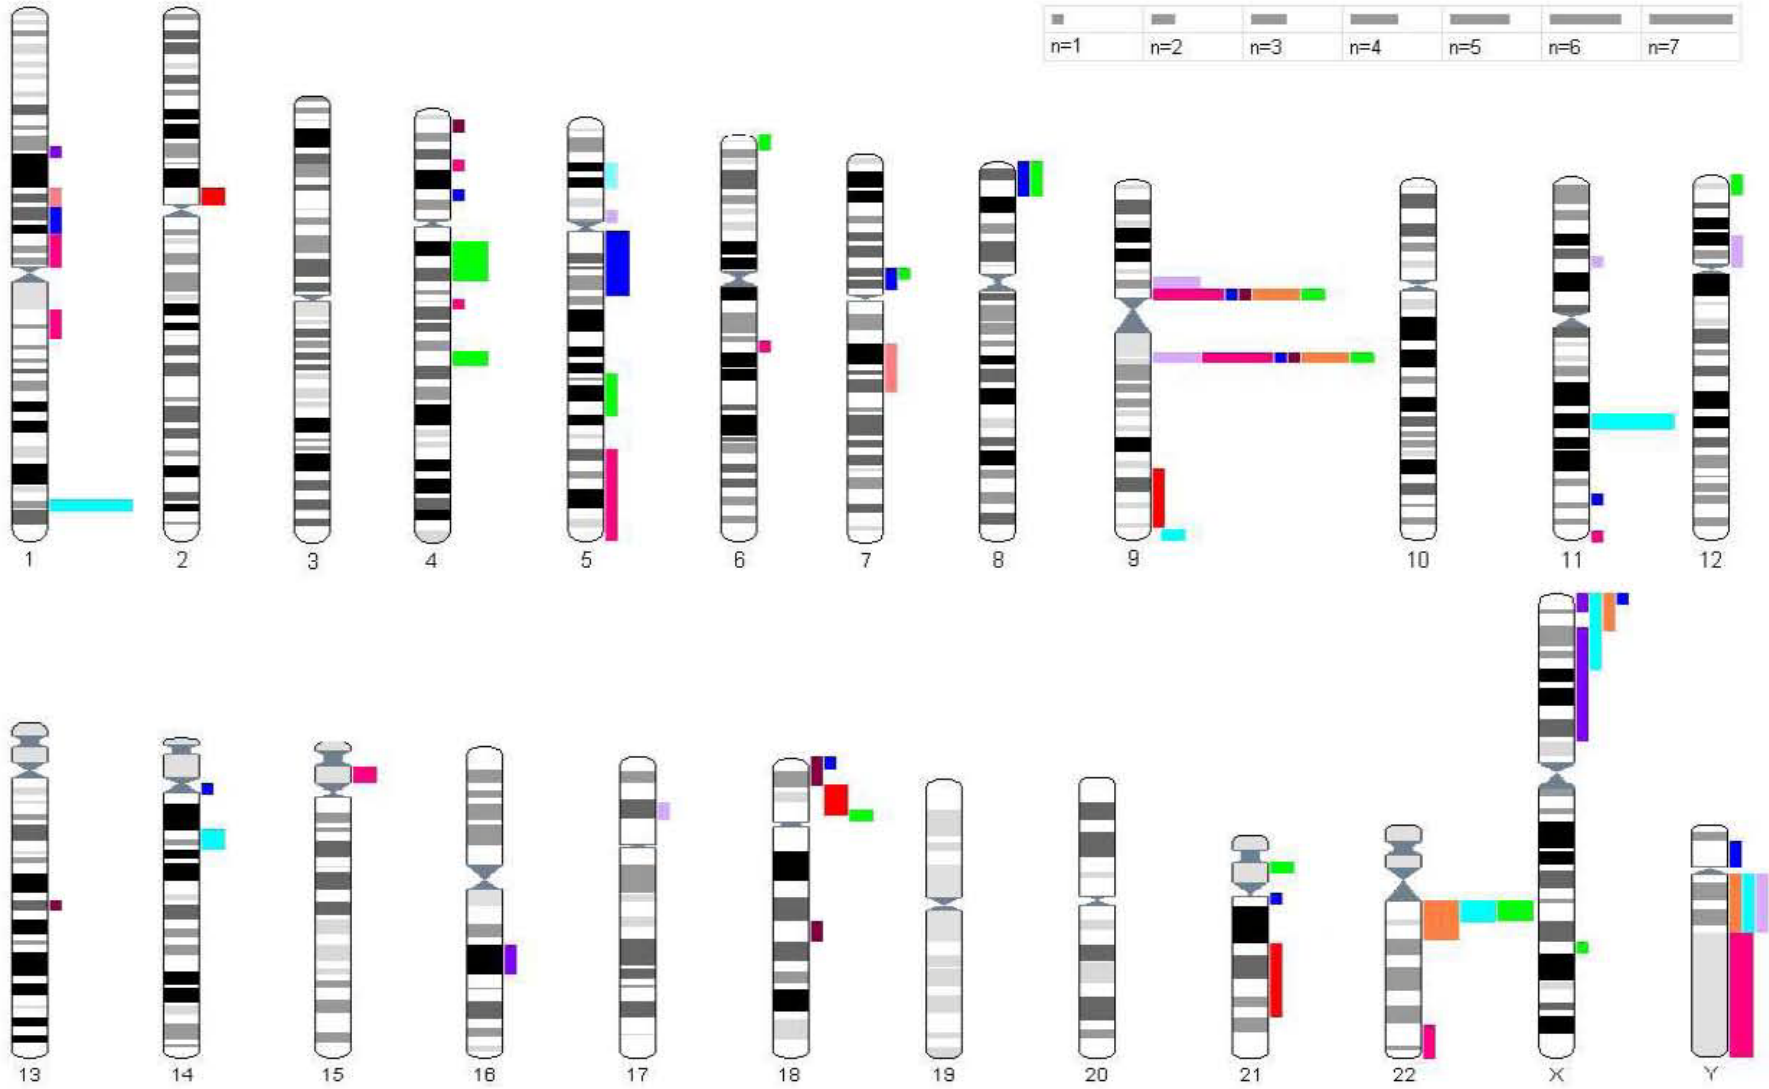

**Figure S3.** [Adapted from UCSC genome browser image]. Location of CNVs in the 22q11 region. LCR: Low Copy Repeat, with the typical 22q11.2 deletion mediated by LCRs A and D. Green boxes: deletions, Red boxes: duplications.

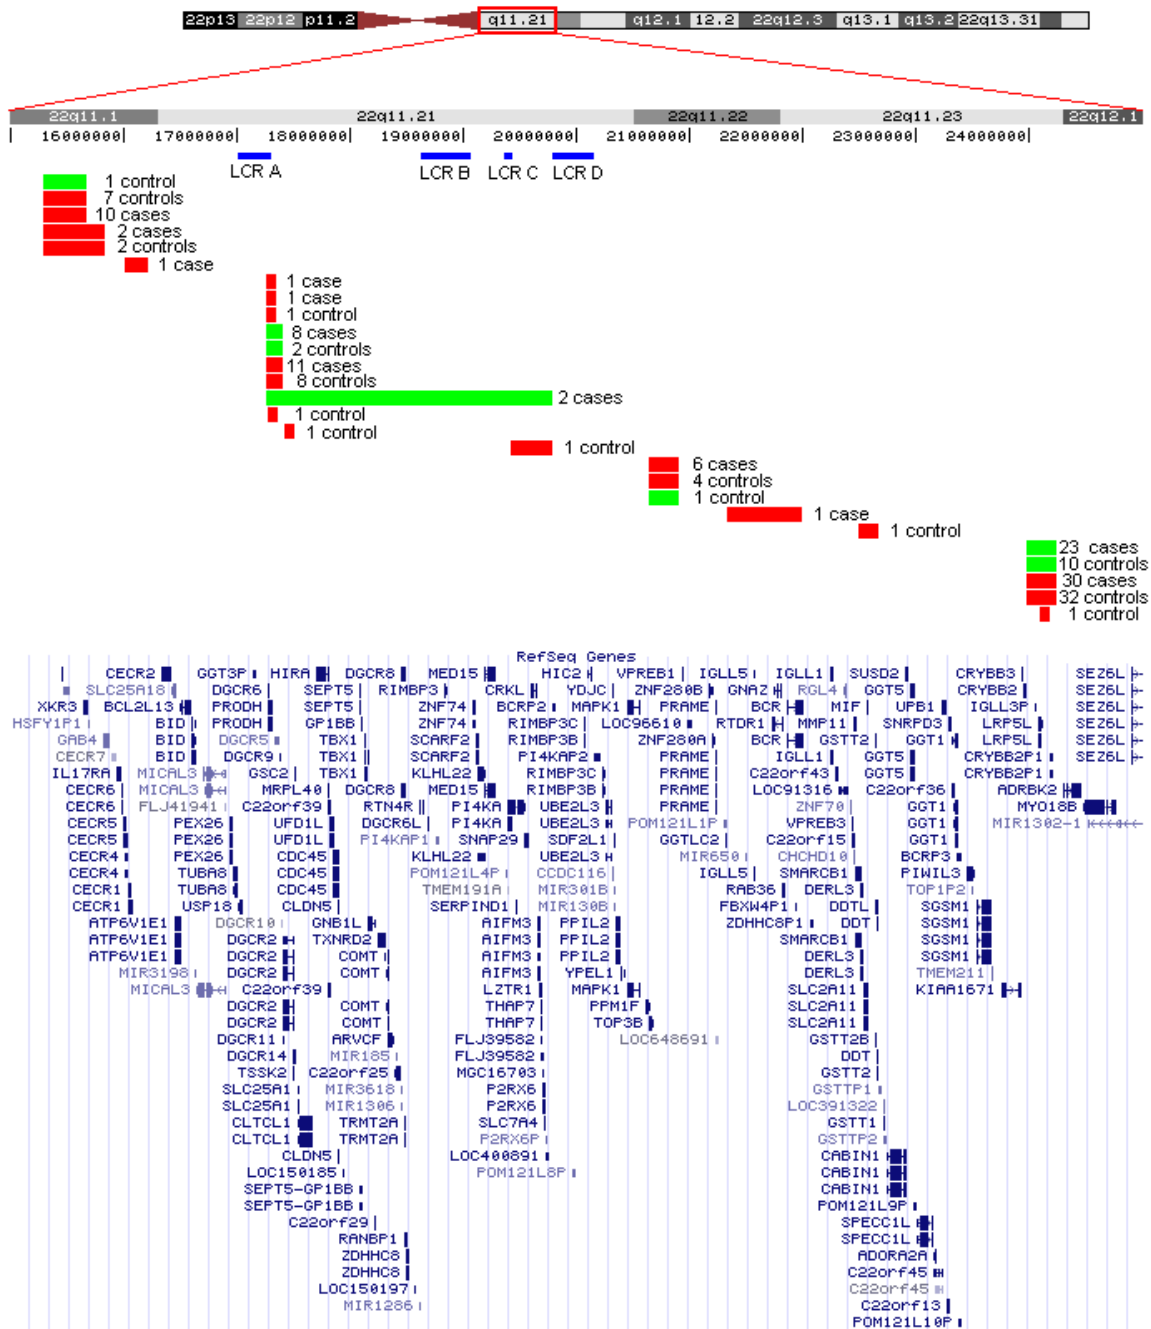

Supplement: NIHMS279509-supplement-01.pdf [file NIHMS279509-supplement-01.pdf]
